# Supplementary material for: SERBP1 interacts with PARP1 and is present in PARylation-dependent protein complexes regulating splicing, cell division, and ribosome biogenesis
Source: bioRxiv preprint, doi:10.1101/2024.03.22.586270, version 2 (2024-10-12)
Supplement: Supplementary Table 8 [file 586270_file18.xlsx]

## Sheet: Table of Content
Table S8
Analysis of SERBP1 and hnRNPU impact on splicing
Table of Content
Sheet	Description
rMATS summary	Consolidated data of the following sheet showing instances of alternative splicing events in U251 knockdown vs. control cells and numbers of genes affected
rMATS SERBP1	Splicing events altered in SERBP1 knockdown cells (only significant events - |dPSI|>0.1 & FDR<0.05)
Overlap CLIP	SERBP1 CLIP sites detected close (<100 nt) to splice sites of events affected by SERBP1 KD
rmATS hnRNPU	Splicing events altered in hnRNPU knockdown cells (only significant events - |dPSI|>0.1 & FDR<0.05)
Overlap SERBP1 hnRNPU	Splicing events showing the same alterations in both analyses of SERBP1 and hnRNPU knockdown
Splicing events in snoRNA hosts	Splicing events in snoRNA host genes altered in SERBP1 knockdown cells
References
Human reference genome GRCh38	Nucleic Acids Res. 2016 Jan 4;44(D1):D73-80. doi: 10.1093/nar/gkv1226.
GENCODE transcriptome Release 29	Nucleic Acids Res. 2021 Jan 8;49(D1):D916-D923. doi: 10.1093/nar/gkaa1087.
STAR	Bioinformatics. 2013 Jan 1;29(1):15-21. doi: 10.1093/bioinformatics/bts635.
rMATS	Proc Natl Acad Sci U S A. 2014 Dec 23;111(51):E5593-601. doi: 10.1073/pnas.1419161111.
CLIP data	Nat Commun. 2021 Nov 26;12(1):6934. doi: 10.1038/s41467-021-27189-5

## Sheet: rMATS summary
KD SERBP1	# AS events				KD SERBP1	# Genes with AS events
	KD	Control	KD or Control			KD	Control	KD and/or Control
SE	490	684	1174		SE	416	559	924
RI	54	66	120		RI	51	65	113
MXE	57	46	103		MXE	54	44	97
A5SS	67	40	107		A5SS	65	39	102
A3SS	72	49	121		A3SS	68	48	116
Total	740	885	1625		Total	628	729	1256
KD HNRNPU	# AS events				KD HNRNPU	# Genes with AS events
	KD	Control	KD or Control			KD	Control	KD and/or Control
SE	3628	1862	5490		SE	2297	1277	3159
RI	356	117	473		RI	312	113	408
MXE	455	382	837		MXE	354	315	601
A5SS	180	146	326		A5SS	171	130	294
A3SS	218	167	385		A3SS	204	155	346
Total	4837	2674	7511		Total	2852	1774	3830

## Sheet: rMATS SERBP1
AS Events KD												AS Events Control
event.id	gene.id	gene.symbol	event.type	chr	strand	event.coords	inc.levels.KD	inc.levels.control	deltaPSI	FDR		event.id	gene.id	gene.symbol	event.type	chr	strand	event.coords	inc.levels.KD	inc.levels.control	deltaPSI	FDR
36712	ENSG00000144504.15	ANKMY1	SE	chr2	-	240507559-240507691:240509347-240509455:240511860-240512001	0.0,0.0,0.0	1.0,0.699,1.0	0.9	9.06425e-08		2629	ENSG00000186575.17	NF2	SE	chr22	+	29681438-29681601:29683019-29683064:29694751-29694806	0.504,0.511,0.523	0.436,0.392,0.411	-0.1	0.00144978
84554	ENSG00000139865.16	TTC6	SE	chr14	+	37682757-37682964:37696716-37696835:37701331-37701526	0.0,0.0,0.0	1.0,1.0,0.527	0.842	1.41892e-06		35185	ENSG00000163517.14	HDAC11	SE	chr3	+	13498512-13498555:13500712-13500789:13501870-13501933	1.0,1.0,1.0	0.849,0.851,1.0	-0.1	0.0132756
40188	ENSG00000134644.15	PUM1	SE	chr1	-	31028795-31028864:31055312-31055380:31059298-31059577	0.256,0.256,0.0	1.0,0.906,1.0	0.798	1.54525e-07		36944	ENSG00000227036.7	LINC00511	SE	chr17	-	72403321-72404816:72420699-72420964:72592202-72592692	0.915,0.914,0.979	0.79,0.831,0.887	-0.1	0.0120182
84553	ENSG00000139865.16	TTC6	SE	chr14	+	37682757-37682964:37696694-37696835:37701331-37701526	0.0,0.0,0.0	1.0,1.0,0.339	0.78	0.00329246		38882	ENSG00000115459.17	ELMOD3	SE	chr2	+	85355075-85355170:85356601-85356667:85356966-85357252	0.051,0.172,0.104	0.0,0.027,0.0	-0.1	0.0180254
65296	ENSG00000136870.10	ZNF189	SE	chr9	+	101399027-101399189:101399394-101399530:101399883-101400010	0.343,0.511,0.0	0.887,1.0,1.0	0.678	7.64307e-05		64519	ENSG00000279457.4	FO538757.1	SE	chr1	-	187375-187577:188129-188266:188438-188584	1.0,1.0,0.94	0.923,1.0,0.717	-0.1	0.0248911
3656	ENSG00000142188.16	TMEM50B	SE	chr21	-	33448781-33448879:33460412-33460505:33467009-33467122	0.0,1.0,0.0	1.0,1.0,1.0	0.667	1.23499e-05		76872	ENSG00000188785.11	ZNF548	SE	chr19	+	57390004-57390114:57390721-57390845:57394187-57394223	0.0,0.12,0.214	0.035,0.0,0.0	-0.1	0.0234081
8177	ENSG00000214293.8	APTR	SE	chr7	-	77659092-77659318:77661197-77661333:77695895-77696265	1.0,0.0,0.0	1.0,1.0,1.0	0.667	0.00192252		98025	ENSG00000171017.10	LRRC8E	SE	chr19	+	7888504-7888600:7893716-7893859:7895598-7895741	0.21,0.075,0.162	0.029,0.085,0.034	-0.1	0.0327174
59628	ENSG00000138663.8	COPS4	SE	chr4	+	83063075-83063246:83065059-83065155:83068437-83068522	0.0,1.0,0.0	1.0,1.0,1.0	0.667	0.000232618		103699	ENSG00000166913.12	YWHAB	SE	chr20	+	44886878-44886978:44887647-44887742:44901530-44901756	1.0,0.981,1.0	0.919,0.816,0.947	-0.1	2.36807e-05
76386	ENSG00000255036.6	STRA6LP	SE	chr9	+	97290853-97290902:97291370-97291487:97293946-97294110	1.0,0.0,0.0	1.0,1.0,1.0	0.667	6.65635e-05		7179	ENSG00000150433.9	TMEM218	SE	chr11	-	125101200-125101303:125102131-125102302:125102733-125102809	0.948,0.965,0.945	0.903,0.826,0.827	-0.101	0.0211629
79924	ENSG00000175215.10	CTDSP2	SE	chr12	-	57824226-57824319:57826995-57827123:57827551-57827590	1.0,0.0,0.0	1.0,1.0,1.0	0.667	0.00045002		18667	ENSG00000177119.15	ANO6	SE	chr12	+	45216084-45216391:45270461-45270524:45302013-45302093	0.1,0.204,0.232	0.06,0.082,0.091	-0.101	0.0242508
88459	ENSG00000147679.11	UTP23	SE	chr8	+	116766508-116766791:116779482-116779586:116786502-116786649	0.0,0.0,1.0	1.0,1.0,1.0	0.667	9.75751e-05		24184	ENSG00000106829.18	TLE4	SE	chr9	+	79612655-79612718:79627373-79627448:79652592-79652794	1.0,1.0,0.899	0.862,0.894,0.839	-0.101	0.00356485
41513	ENSG00000267123.6	LINC02081	SE	chr17	-	78627917-78628035:78628317-78628438:78630031-78630141	0.315,0.469,0.235	1.0,1.0,1.0	0.66	2.20078e-07		27930	ENSG00000075303.12	SLC25A40	SE	chr7	-	87841632-87841714:87843753-87843863:87846948-87847122	0.948,1.0,1.0	0.76,0.927,0.958	-0.101	0.0294437
36699	ENSG00000116580.18	GON4L	SE	chr1	-	155826869-155827028:155831534-155831620:155832831-155832950	0.0,0.0,0.297	0.241,1.0,1.0	0.648	0.021454		48374	ENSG00000163898.9	LIPH	SE	chr3	-	185519141-185519309:185524070-185524160:185527483-185527585	0.929,1.0,1.0	0.752,1.0,0.875	-0.101	0.0103249
18846	ENSG00000172382.9	PRSS27	SE	chr16	-	2714064-2714336:2715717-2715880:2716499-2716526	0.16,0.589,0.323	1.0,1.0,1.0	0.643	1.07811e-07		81466	ENSG00000169609.13	C15orf40	SE	chr15	-	82988440-82988828:82991955-82992046:83008547-83008675	0.0,0.22,0.142	0.0,0.0,0.058	-0.101	0.0440149
36322	ENSG00000011275.18	RNF216	SE	chr7	-	5761010-5761138:5766894-5766939:5775004-5775179	0.535,0.0,0.0	1.0,0.434,1.0	0.633	0.0204279		12890	ENSG00000204580.13	DDR1	SE	chr6	+	30884352-30884710:30885624-30885680:30888687-30888814	0.614,0.558,0.631	0.526,0.473,0.497	-0.102	0.0103779
76726	ENSG00000143436.10	MRPL9	SE	chr1	-	151759642-151760181:151761450-151761552:151762112-151762155	0.117,0.372,0.426	0.704,1.0,1.0	0.596	4.83131e-05		15785	ENSG00000131504.16	DIAPH1	SE	chr5	-	141587041-141587197:141588223-141588250:141618797-141618999	0.863,0.852,0.876	0.771,0.796,0.718	-0.102	4.2767e-05
59886	ENSG00000270011.7	ZNF559-ZNF177	SE	chr19	+	9324694-9324780:9338493-9338582:9341101-9341184	0.385,0.0,0.173	1.0,1.0,0.343	0.595	0.00917315		16529	ENSG00000218739.9	CEBPZOS	SE	chr2	+	37196504-37196520:37198493-37198672:37199703-37199819	0.194,0.185,0.188	0.109,0.054,0.097	-0.102	0.00101847
96231	ENSG00000108846.15	ABCC3	SE	chr17	+	50634813-50634981:50656701-50656827:50658434-50658496	0.153,0.394,0.448	1.0,1.0,0.765	0.59	0.000554295		33374	ENSG00000058799.14	YIPF1	SE	chr1	-	53888906-53888986:53889243-53889463:53889712-53889780	0.395,0.407,0.433	0.283,0.346,0.297	-0.103	0.0205798
94850	ENSG00000196535.16	MYO18A	SE	chr17	-	29124652-29124688:29125892-29125967:29165941-29167021	0.0,0.0,0.0	0.143,1.0,0.624	0.589	0.0436338		37536	ENSG00000228794.8	LINC01128	SE	chr1	+	847653-847806:850177-850351:851926-852090	0.204,0.044,0.062	0.0,0.0,0.0	-0.103	0.041316
98897	ENSG00000104881.15	PPP1R13L	SE	chr19	-	45396337-45396436:45398004-45398147:45406291-45406309	0.0,0.0,1.0	1.0,0.754,1.0	0.585	0.000413317		54768	ENSG00000127838.13	PNKD	SE	chr2	+	218340727-218340786:218341533-218341626:218341980-218342144	1.0,1.0,1.0	0.76,0.96,0.971	-0.103	0.0242947
15391	ENSG00000120725.12	SIL1	SE	chr5	-	139133333-139133471:139196440-139196528:139198268-139198297	0.626,0.239,0.0	1.0,1.0,0.611	0.582	0.00189375		61267	ENSG00000007341.18	ST7L	SE	chr1	-	112582374-112582472:112583971-112584126:112591524-112591603	1.0,1.0,0.869	0.844,0.913,0.802	-0.103	0.0441171
67622	ENSG00000165996.13	HACD1	SE	chr10	-	17594204-17594383:17603559-17603648:17603929-17604047	0.334,0.0,0.0	0.653,1.0,0.385	0.568	0.0183262		73492	ENSG00000172716.16	SLFN11	SE	chr17	-	35366946-35367043:35367602-35367700:35373473-35373695	0.986,0.927,1.0	0.925,0.881,0.798	-0.103	0.000622724
16644	ENSG00000077782.20	FGFR1	SE	chr8	-	38421796-38421941:38423024-38423175:38427920-38428093	0.0,0.199,0.153	0.332,0.713,1.0	0.564	0.014003		85572	ENSG00000172113.9	NME6	SE	chr3	-	48293263-48294803:48296118-48296158:48296726-48296829	1.0,0.931,1.0	0.833,0.887,0.902	-0.103	0.0270157
23710	ENSG00000174669.11	SLC29A2	SE	chr11	-	66368536-66368671:66369059-66369131:66369368-66369532	0.403,0.574,0.0	1.0,0.669,1.0	0.564	0.0402332		15091	ENSG00000240184.6	PCDHGC3	SE	chr5	+	141476000-141476146:141478393-141478546:141494806-141494865	0.87,0.847,0.812	0.764,0.707,0.745	-0.104	0.00184235
102180	ENSG00000182986.13	ZNF320	SE	chr19	-	52891228-52891346:52893383-52893619:52897647-52897693	0.608,0.162,0.537	1.0,1.0,1.0	0.564	0.000853006		31650	ENSG00000224078.13	SNHG14	SE	chr15	+	25051101-25051236:25053827-25053967:25056482-25056622	1.0,1.0,1.0	0.951,0.736,1.0	-0.104	0.00666995
28719	ENSG00000106723.16	SPIN1	SE	chr9	+	88389370-88389410:88415606-88415699:88416643-88416766	0.0,1.0,0.316	1.0,1.0,1.0	0.561	0.00534588		58215	ENSG00000117481.10	NSUN4	SE	chr1	+	46340819-46340919:46341322-46341497:46344800-46345144	0.309,0.21,0.221	0.123,0.178,0.127	-0.104	0.00368028
43982	ENSG00000103034.14	NDRG4	SE	chr16	+	58494963-58495008:58499143-58501077:58503797-58503903	0.16,0.186,0.239	1.0,0.477,0.791	0.561	0.00261433		88511	ENSG00000140463.13	BBS4	SE	chr15	+	72724527-72724655:72729615-72729684:72731304-72731457	1.0,1.0,1.0	1.0,0.945,0.744	-0.104	0.00989807
92134	ENSG00000102878.16	HSF4	SE	chr16	+	67169035-67169101:67169278-67169348:67169630-67169781	0.645,0.185,0.312	0.826,1.0,1.0	0.561	0.000378217		27864	ENSG00000158106.13	RHPN1	SE	chr8	+	143375552-143375668:143376524-143376653:143377379-143377455	1.0,0.94,0.94	0.898,0.828,0.84	-0.105	0.0281113
86294	ENSG00000140153.17	WDR20	SE	chr14	+	102194937-102195120:102197754-102197847:102208861-102210521	0.48,0.133,0.711	1.0,1.0,1.0	0.559	5.24668e-06		67561	ENSG00000103197.17	TSC2	SE	chr16	+	2076490-2076585:2077597-2077726:2079034-2079196	0.197,0.211,0.26	0.084,0.109,0.16	-0.105	0.000387207
67980	ENSG00000225077.3	LINC00337	SE	chr1	+	6237244-6237345:6237813-6237848:6238220-6238940	0.351,1.0,0.0	1.0,1.0,1.0	0.55	0.000242546		68297	ENSG00000150712.10	MTMR12	SE	chr5	-	32273979-32274122:32276681-32276742:32312757-32312938	0.932,0.989,0.967	0.93,0.825,0.819	-0.105	0.00149285
70359	ENSG00000156398.12	SFXN2	SE	chr10	+	102716233-102716329:102724935-102724996:102726611-102726797	0.587,0.503,0.262	1.0,1.0,1.0	0.549	6.27297e-06		44112	ENSG00000196922.10	ZNF252P	SE	chr8	-	144994478-144994592:144996506-144996607:144999602-144999769	0.953,1.0,0.943	0.667,0.95,0.962	-0.106	0.0365374
32652	ENSG00000102900.12	NUP93	SE	chr16	+	56836600-56836717:56838951-56839069:56841704-56841833	0.0,1.0,0.358	1.0,1.0,1.0	0.547	0.00730634		66284	ENSG00000121749.15	TBC1D15	SE	chr12	+	71839706-71839811:71841100-71841231:71872069-71872168	0.117,0.143,0.081	0.024,0.0,0.0	-0.106	0.0130746
65066	ENSG00000204681.10	GABBR1	SE	chr6	-	29629086-29629107:29630521-29630643:29631395-29631599	0.524,0.268,0.579	1.0,1.0,1.0	0.543	0.000729754		79260	ENSG00000135390.18	ATP5MC2	SE	chr12	-	53665238-53665428:53669870-53670114:53672575-53672645	1.0,1.0,1.0	1.0,0.681,1.0	-0.106	0.00649071
60810	ENSG00000215386.12	MIR99AHG	SE	chr21	+	16487489-16487538:16589352-16589540:16594339-16594454	0.689,0.0,0.0	0.307,1.0,1.0	0.539	0.00166903		94395	ENSG00000121281.12	ADCY7	SE	chr16	+	50308326-50308411:50308666-50308792:50309547-50309646	1.0,1.0,1.0	0.938,0.931,0.813	-0.106	0.0096805
51245	ENSG00000136002.18	ARHGEF4	SE	chr2	+	131027944-131028084:131043451-131043583:131045368-131045446	1.0,0.0,0.0	1.0,1.0,0.614	0.538	0.00113643		864	ENSG00000094841.13	UPRT	SE	chrX	+	75274084-75274640:75293471-75293514:75299734-75299896	0.949,1.0,1.0	1.0,0.928,0.7	-0.107	0.0246411
102906	ENSG00000173253.15	DMRT2	SE	chr9	+	1053721-1053824:1055721-1055799:1056215-1056830	0.396,0.0,0.0	0.0,1.0,1.0	0.535	0.0220464		9719	ENSG00000164638.10	SLC29A4	SE	chr7	+	5291692-5291821:5294859-5294934:5298987-5299126	1.0,1.0,0.956	0.936,0.777,0.923	-0.107	0.0118917
13988	ENSG00000083097.14	DOP1A	SE	chr6	+	83110124-83110314:83113322-83113421:83118887-83118987	0.107,1.0,0.311	1.0,1.0,1.0	0.527	0.0010396		13692	ENSG00000124782.19	RREB1	SE	chr6	+	7228996-7231907:7246423-7247221:7248510-7249274	0.942,1.0,0.975	0.896,0.766,0.934	-0.107	0.00730634
79631	ENSG00000152380.9	FAM151B	SE	chr5	+	80487968-80488148:80501791-80501917:80513603-80513661	0.419,1.0,0.0	1.0,1.0,1.0	0.527	0.00636032		22199	ENSG00000133619.17	KRBA1	SE	chr7	+	149714780-149715066:149715238-149715349:149719545-149719672	0.054,0.177,0.168	0.0,0.079,0.0	-0.107	0.0132756
84393	ENSG00000168952.15	STXBP6	SE	chr14	-	24987885-24987972:25010524-25010640:25049877-25050064	0.0,1.0,0.428	1.0,1.0,1.0	0.524	0.0228499		78873	ENSG00000161791.13	FMNL3	SE	chr12	-	49644930-49645903:49646638-49646753:49646885-49647009	0.94,0.958,0.907	0.82,0.906,0.757	-0.107	0.0389226
102187	ENSG00000182986.13	ZNF320	SE	chr19	-	52891228-52891346:52893778-52893927:52897647-52897693	0.333,0.429,0.667	1.0,1.0,1.0	0.524	0.00145634		14685	ENSG00000070814.19	TCOF1	SE	chr5	+	150389886-150390023:150391543-150391657:150391956-150392176	0.706,0.713,0.726	0.598,0.654,0.568	-0.108	0.00254744
14755	ENSG00000175471.19	MCTP1	SE	chr5	-	94912805-94912976:94917895-94917973:94940083-94940195	0.396,0.0,0.0	0.568,1.0,0.396	0.523	0.00165341		17447	ENSG00000164258.11	NDUFS4	SE	chr5	+	53603451-53603530:53604723-53604895:53683117-53683338	1.0,0.955,1.0	0.848,0.784,1.0	-0.108	0.016924
25736	ENSG00000132780.16	NASP	SE	chr1	+	45591222-45591270:45613168-45613248:45614292-45614366	0.394,0.303,0.394	1.0,1.0,0.661	0.523	0.0013618		34206	ENSG00000233429.9	HOTAIRM1	SE	chr7	+	27096232-27096388:27099073-27099366:27099778-27099966	0.221,0.193,0.225	0.099,0.085,0.13	-0.108	1.17884e-07
54980	ENSG00000105397.13	TYK2	SE	chr19	-	10368294-10368371:10369756-10369877:10378213-10378426	0.356,0.356,0.479	0.752,1.0,1.0	0.52	0.00146559		44303	ENSG00000204406.13	MBD5	SE	chr2	+	148458202-148458871:148462581-148462684:148463738-148463919	1.0,1.0,1.0	0.867,1.0,0.809	-0.108	0.0338819
94966	ENSG00000134444.14	RELCH	SE	chr18	+	62275373-62275473:62280359-62280442:62280645-62280709	0.491,0.562,0.391	1.0,1.0,1.0	0.519	0.00113643		67165	ENSG00000197343.10	ZNF655	SE	chr7	+	99560532-99560695:99561887-99562494:99563862-99564705	0.683,0.675,0.793	0.614,0.595,0.617	-0.108	0.0467498
53805	ENSG00000167182.14	SP2	SE	chr17	+	47896149-47896293:47915311-47915388:47922961-47923274	0.142,0.0,0.0	0.687,0.0,1.0	0.515	0.0100467		82684	ENSG00000133104.13	SPART	SE	chr13	-	36335020-36335832:36336286-36336358:36346224-36346283	0.177,0.204,0.177	0.01,0.081,0.142	-0.108	0.0277014
95761	ENSG00000184007.20	PTP4A2	SE	chr1	-	31919568-31919658:31935588-31935659:31937777-31937818	0.404,0.458,0.0	0.404,1.0,1.0	0.514	0.00393318		9281	ENSG00000109466.13	KLHL2	SE	chr4	+	165219933-165220059:165228806-165228913:165238777-165238831	1.0,0.92,0.908	0.933,0.787,0.781	-0.109	0.0460613
90324	ENSG00000262468.6	LINC01569	SE	chr16	-	4243942-4247061:4251321-4252034:4253676-4253817	0.206,0.257,0.692	1.0,0.686,1.0	0.51	0.0443241		74880	ENSG00000110075.14	PPP6R3	SE	chr11	+	68575957-68576043:68583042-68583129:68587944-68588024	1.0,1.0,0.971	0.791,0.923,0.931	-0.109	0.00460909
15872	ENSG00000064692.18	SNCAIP	SE	chr5	+	122403792-122403865:122425351-122425531:122431968-122432082	0.475,0.0,1.0	1.0,1.0,1.0	0.508	0.0156289		83748	ENSG00000130177.15	CDC16	SE	chr13	+	114234886-114235132:114236644-114236699:114236801-114236896	1.0,1.0,1.0	1.0,0.896,0.777	-0.109	0.00165837
69102	ENSG00000127616.18	SMARCA4	SE	chr19	+	10977652-10977815:10980776-10980852:10984123-10984373	0.57,0.142,0.57	0.799,1.0,1.0	0.506	0.00122525		87846	ENSG00000069943.9	PIGB	SE	chr15	+	55341737-55341802:55350698-55350912:55354797-55354978	1.0,0.941,0.979	0.964,0.722,0.906	-0.109	0.00813808
102271	ENSG00000112796.9	ENPP5	SE	chr6	-	46167433-46168297:46170052-46170114:46170807-46170971	0.0,0.15,0.0	0.66,0.0,1.0	0.503	0.00480409		7783	ENSG00000166529.14	ZSCAN21	SE	chr7	+	100057697-100057890:100063787-100063979:100064082-100065038	0.926,1.0,1.0	0.792,0.847,0.956	-0.11	0.0137774
90053	ENSG00000135018.13	UBQLN1	SE	chr9	-	83666349-83669327:83682950-83683066:83707499-83707934	0.123,0.0,1.0	1.0,0.628,1.0	0.502	0.00168457		10636	ENSG00000079819.18	EPB41L2	SE	chr6	-	130869562-130870126:130878103-130878250:130885095-130885268	0.604,0.636,0.599	0.496,0.513,0.501	-0.11	0.0183262
90783	ENSG00000174628.16	IQCK	SE	chr16	+	19733697-19733827:19763847-19764112:19788837-19788922	0.265,0.0,0.093	0.742,0.569,0.552	0.502	0.0065732		14687	ENSG00000070814.19	TCOF1	SE	chr5	+	150389886-150390023:150391543-150391795:150391956-150394916	0.382,0.399,0.389	0.266,0.309,0.265	-0.11	0.00239836
43909	ENSG00000157734.13	SNX22	SE	chr15	+	64151740-64151850:64152242-64152742:64153244-64153339	0.408,0.103,1.0	1.0,1.0,1.0	0.496	0.00481599		18871	ENSG00000063761.15	ADCK1	SE	chr14	+	77907802-77907919:77924456-77924606:77931517-77931711	1.0,1.0,1.0	0.824,0.971,0.875	-0.11	0.00965045
65064	ENSG00000204681.10	GABBR1	SE	chr6	-	29629086-29629107:29630457-29630643:29631395-29631599	0.572,0.308,0.64	1.0,1.0,1.0	0.493	0.00129798		53428	ENSG00000104067.16	TJP1	SE	chr15	-	29718265-29719138:29719776-29720016:29720357-29720708	0.456,0.466,0.405	0.335,0.302,0.359	-0.11	0.0374534
98210	ENSG00000123106.10	CCDC91	SE	chr12	+	28225794-28225861:28226139-28226199:28255580-28255662	0.641,0.363,0.517	1.0,1.0,1.0	0.493	1.32675e-05		87100	ENSG00000179588.8	ZFPM1	SE	chr16	+	88514386-88514520:88516112-88516233:88526813-88526916	0.084,0.0,0.263	0.0,0.0,0.017	-0.11	0.00206572
61312	ENSG00000131507.10	NDFIP1	SE	chr5	+	142132211-142132342:142137733-142137858:142144570-142144676	0.12,1.0,0.405	1.0,1.0,1.0	0.492	0.000665257		55981	ENSG00000126391.13	FRMD8	SE	chr11	+	65387036-65387121:65393572-65393674:65394040-65394099	1.0,0.902,1.0	0.859,0.806,0.905	-0.111	0.0102544
15704	ENSG00000107614.21	TRDMT1	SE	chr10	-	17160304-17160374:17162165-17162237:17168840-17168917	0.144,0.0,0.144	0.503,1.0,0.252	0.489	0.00364098		6779	ENSG00000131437.15	KIF3A	SE	chr5	-	132699170-132699295:132700215-132700284:132700646-132700700	1.0,0.883,1.0	0.899,0.816,0.832	-0.112	0.0363199
46086	ENSG00000135740.16	SLC9A5	SE	chr16	+	67259819-67259946:67262211-67262289:67264351-67264522	0.18,0.396,0.0	1.0,0.33,0.697	0.484	0.0420674		42918	ENSG00000114867.20	EIF4G1	SE	chr3	+	184314494-184314674:184315762-184315856:184317320-184317497	0.245,0.359,0.38	0.186,0.22,0.242	-0.112	0.0362866
52225	ENSG00000008394.12	MGST1	SE	chr12	+	16347644-16347710:16354230-16354270:16363794-16363999	0.283,0.0,0.612	0.825,0.703,0.798	0.477	0.019807		92672	ENSG00000198909.7	MAP3K3	SE	chr17	+	63691732-63691862:63692241-63692419:63693548-63693874	0.907,0.919,0.858	0.742,0.805,0.802	-0.112	0.0026362
82111	ENSG00000060709.15	RIMBP2	SE	chr12	-	130506647-130506770:130517827-130517917:130628321-130628456	0.2,0.0,0.609	0.238,1.0,1.0	0.476	0.0317039		22201	ENSG00000133619.17	KRBA1	SE	chr7	+	149715010-149715066:149719545-149719672:149720007-149720127	1.0,1.0,0.96	0.98,0.952,0.688	-0.113	0.0103029
15871	ENSG00000064692.18	SNCAIP	SE	chr5	+	122403792-122403865:122422867-122423739:122431968-122432082	0.422,0.154,1.0	1.0,1.0,1.0	0.475	0.0135134		88506	ENSG00000140463.13	BBS4	SE	chr15	+	72716777-72716850:72722788-72722847:72724527-72724575	1.0,0.915,1.0	0.94,0.759,0.878	-0.113	0.0399135
73269	ENSG00000149182.14	ARFGAP2	SE	chr11	-	47172025-47172333:47173758-47173840:47175181-47175313	0.518,0.392,0.392	0.721,1.0,1.0	0.473	0.00228491		10767	ENSG00000118518.15	RNF146	SE	chr6	+	127280230-127280340:127285207-127285348:127286049-127286097	0.054,0.154,0.241	0.044,0.064,0.0	-0.114	0.0305569
56702	ENSG00000135801.9	TAF5L	SE	chr1	-	229606833-229606876:229607773-229607835:229610105-229610210	0.261,0.622,0.204	1.0,0.679,0.809	0.467	0.0223782		43626	ENSG00000166526.16	ZNF3	SE	chr7	-	100077017-100077433:100079535-100079656:100081634-100081703	0.986,0.971,0.882	0.859,0.851,0.787	-0.114	0.00481599
100436	ENSG00000087085.14	ACHE	SE	chr7	-	100891168-100891338:100892333-100892554:100893164-100894252	0.0,0.232,1.0	1.0,1.0,0.617	0.462	0.00204599		54444	ENSG00000157036.12	EXOG	SE	chr3	+	38497628-38497778:38500089-38500164:38501354-38501494	0.091,0.129,0.282	0.098,0.012,0.049	-0.114	0.0363483
103111	ENSG00000100997.18	ABHD12	SE	chr20	-	25309445-25309575:25320198-25320318:25339226-25339351	1.0,0.156,0.156	1.0,0.689,1.0	0.459	0.00206219		65701	ENSG00000167595.15	PROSER3	SE	chr19	+	35758142-35758226:35759788-35759991:35762018-35762146	0.934,0.928,1.0	0.834,0.813,0.874	-0.114	0.0182728
11986	ENSG00000137221.14	TJAP1	SE	chr6	+	43477522-43477628:43478658-43478718:43497880-43497977	0.384,0.3,0.294	0.877,0.662,0.811	0.457	0.00252129		68746	ENSG00000100813.14	ACIN1	SE	chr14	-	23069475-23069617:23071124-23071186:23071426-23071538	0.521,0.428,0.407	0.371,0.361,0.281	-0.114	0.0345123
55910	ENSG00000114354.13	TFG	SE	chr3	+	100709969-100710295:100710970-100711068:100713642-100713869	0.547,0.0,0.335	0.707,0.547,1.0	0.457	0.0256262		88510	ENSG00000140463.13	BBS4	SE	chr15	+	72724527-72724655:72727939-72727994:72731304-72731457	1.0,1.0,1.0	1.0,0.948,0.711	-0.114	0.0222729
67260	ENSG00000133794.17	ARNTL	SE	chr11	+	13277797-13277923:13326412-13326467:13349944-13350070	0.687,0.268,0.687	1.0,1.0,1.0	0.453	0.0418122		91535	ENSG00000154114.12	TBCEL	SE	chr11	+	121054747-121055308:121058344-121058471:121086777-121086849	1.0,0.89,1.0	0.785,1.0,0.764	-0.114	0.0292609
101747	ENSG00000215769.8	ARHGAP27P1-BPTFP1-KPNA2P3	SE	chr17	-	64749662-64750008:64750593-64750723:64751806-64751956	1.0,0.0,0.0	0.348,1.0,1.0	0.449	0.0232372		102007	ENSG00000062822.13	POLD1	SE	chr19	+	50393974-50394063:50395024-50395150:50398850-50399053	0.924,1.0,0.956	0.842,0.77,0.926	-0.114	0.0426431
14752	ENSG00000175471.19	MCTP1	SE	chr5	-	94779109-94779163:94799012-94799132:94868332-94868452	0.454,0.624,0.581	1.0,1.0,1.0	0.447	0.0213006		2952	ENSG00000244486.8	SCARF2	SE	chr22	-	20430689-20430908:20431017-20431537:20431744-20431846	0.858,0.966,0.908	0.807,0.824,0.756	-0.115	0.0334468
16127	ENSG00000151422.12	FER	SE	chr5	+	108747821-108748000:108768092-108768238:108798123-108798389	0.112,0.503,0.716	1.0,1.0,0.669	0.446	0.0202807		22200	ENSG00000133619.17	KRBA1	SE	chr7	+	149715010-149715066:149719532-149719672:149720007-149720127	1.0,1.0,0.944	0.974,0.944,0.682	-0.115	0.012646
101216	ENSG00000223546.6	LINC00630	SE	chrX	+	102769217-102769341:102816991-102817082:102825992-102826169	1.0,0.437,0.237	1.0,1.0,1.0	0.442	0.00928674		49223	ENSG00000176261.15	ZBTB8OS	SE	chr1	-	32627507-32627544:32631826-32631879:32650428-32650550	1.0,0.952,0.956	0.942,0.937,0.683	-0.115	0.0325835
29266	ENSG00000151689.12	INPP1	SE	chr2	+	190343917-190344078:190348887-190349031:190360038-190360131	0.175,1.0,0.504	1.0,1.0,1.0	0.44	0.000544308		56724	ENSG00000110881.11	ASIC1	SE	chr12	+	50059758-50059954:50077212-50077363:50077999-50078127	1.0,1.0,1.0	0.942,1.0,0.713	-0.115	0.0237958
43985	ENSG00000103034.14	NDRG4	SE	chr16	+	58494963-58495008:58500987-58501077:58503797-58503903	0.581,0.466,0.428	1.0,0.849,0.946	0.44	2.00649e-05		1517	ENSG00000102054.17	RBBP7	SE	chrX	-	16852045-16852122:16852415-16852550:16852748-16852875	0.947,1.0,1.0	1.0,0.6,1.0	-0.116	0.0310833
47324	ENSG00000003989.17	SLC7A2	SE	chr8	+	17497087-17497237:17502256-17502302:17543317-17543715	0.203,0.0,0.753	1.0,0.276,1.0	0.44	0.0443276		36423	ENSG00000164162.13	ANAPC10	SE	chr4	-	145095984-145096111:145097494-145097562:145097687-145097760	0.096,0.34,0.059	0.0,0.147,0.0	-0.116	0.0254538
7212	ENSG00000150433.9	TMEM218	SE	chr11	-	125110490-125110549:125110643-125110746:125111586-125111613	0.372,0.674,0.639	1.0,1.0,1.0	0.438	0.000797983		69588	ENSG00000131143.8	COX4I1	SE	chr16	+	85801204-85801278:85804539-85804661:85804940-85805328	0.182,0.177,0.138	0.013,0.029,0.107	-0.116	0.000387207
54987	ENSG00000196345.12	ZKSCAN7	SE	chr3	+	44565486-44565655:44567911-44568003:44568306-44568433	0.553,0.0,0.134	0.0,1.0,1.0	0.438	0.0343		89099	ENSG00000089639.10	GMIP	SE	chr19	-	19641975-19642051:19642536-19642619:19643510-19643601	1.0,1.0,0.92	0.628,0.943,1.0	-0.116	0.03384
97482	ENSG00000137075.17	RNF38	SE	chr9	-	36369718-36369932:36390466-36390616:36400553-36400923	0.564,0.529,0.399	1.0,0.799,1.0	0.436	0.000263129		3549	ENSG00000182670.13	TTC3	SE	chr21	+	37091292-37091413:37094004-37094090:37095349-37095444	1.0,1.0,1.0	0.915,1.0,0.733	-0.117	0.0343
76645	ENSG00000214548.16	MEG3	SE	chr14	+	100831015-100831094:100831420-100831534:100836166-100836300	0.548,0.757,0.389	1.0,1.0,1.0	0.435	2.6544e-05		27588	ENSG00000225470.7	JPX	SE	chrX	+	73944183-73944465:73944583-73944662:73946998-73947096	0.943,1.0,0.942	0.828,0.872,0.835	-0.117	0.00356378
68916	ENSG00000213420.7	GPC2	SE	chr7	-	100172086-100172217:100174684-100174765:100176206-100176365	0.206,0.493,1.0	1.0,1.0,1.0	0.434	0.0033643		16778	ENSG00000120647.9	CCDC77	SE	chr12	+	389349-389486:405510-405564:411746-411978	1.0,1.0,0.688	0.71,1.0,0.623	-0.118	0.0101669
99709	ENSG00000171466.9	ZNF562	SE	chr19	-	9653707-9653881:9658008-9658135:9660719-9660874	0.403,0.73,0.564	1.0,1.0,1.0	0.434	1.51686e-05		64227	ENSG00000011451.19	WIZ	SE	chr19	-	15426981-15427533:15431011-15431182:15432433-15432557	0.86,0.843,0.932	0.771,0.75,0.761	-0.118	0.0224258
61875	ENSG00000114796.15	KLHL24	SE	chr3	+	183635622-183635747:183636220-183636311:183643479-183643542	0.094,0.0,1.0	0.383,1.0,1.0	0.43	0.00204599		92186	ENSG00000102901.12	CENPT	SE	chr16	-	67829422-67829516:67829929-67830088:67831215-67831358	1.0,1.0,0.918	0.738,0.826,1.0	-0.118	0.0112411
25954	ENSG00000248323.6	LUCAT1	SE	chr5	-	91302730-91303161:91310855-91311032:91313637-91313777	0.478,0.234,1.0	1.0,1.0,1.0	0.429	0.0163261		99015	ENSG00000142765.17	SYTL1	SE	chr1	+	27349971-27350485:27353282-27353488:27353712-27353893	1.0,1.0,1.0	1.0,1.0,0.647	-0.118	0.0312865
78117	ENSG00000173406.15	DAB1	SE	chr1	-	56994777-56998128:57010679-57010790:57011144-57011272	0.364,0.181,0.067	0.534,0.364,1.0	0.429	0.0363199		30303	ENSG00000005206.16	SPPL2B	SE	chr19	+	2328629-2328775:2337442-2337625:2339068-2339208	1.0,1.0,1.0	0.745,0.897,1.0	-0.119	0.00394001
22166	ENSG00000164294.13	GPX8	SE	chr5	+	55160166-55160243:55160329-55160396:55164054-55164179	0.674,0.408,0.408	1.0,0.775,1.0	0.428	0.0236569		38170	ENSG00000031823.14	RANBP3	SE	chr19	-	5941798-5941835:5951392-5951596:5957906-5957973	1.0,1.0,0.892	0.912,0.896,0.726	-0.119	0.0274319
75003	ENSG00000137497.17	NUMA1	SE	chr11	-	72050661-72050833:72068104-72068231:72069841-72070063	0.598,0.351,0.778	1.0,1.0,1.0	0.424	0.00267331		11323	ENSG00000104447.12	TRPS1	SE	chr8	-	115623600-115623758:115637233-115637330:115668544-115669001	0.359,0.0,0.0	0.0,0.0,0.0	-0.12	0.00968814
8872	ENSG00000214783.9	POLR2J4	SE	chr7	-	43973209-43973323:43986600-43986677:44013592-44013679	0.622,0.331,0.397	0.822,0.798,1.0	0.423	0.00337158		35817	ENSG00000107186.16	MPDZ	SE	chr9	-	13183417-13183585:13186269-13186386:13188783-13188993	1.0,1.0,1.0	0.837,0.907,0.894	-0.121	0.000932496
58873	ENSG00000101391.20	CDK5RAP1	SE	chr20	-	33379460-33379691:33392141-33392242:33401427-33401452	1.0,0.23,0.511	1.0,1.0,1.0	0.42	0.0285112		47353	ENSG00000169760.17	NLGN1	SE	chr3	+	173604278-173605091:173800292-173800352:173807679-173807832	0.118,0.033,0.211	0.0,0.0,0.0	-0.121	0.00650924
81351	ENSG00000089022.13	MAPKAPK5	SE	chr12	+	111841977-111842769:111866155-111866231:111871084-111871180	0.57,0.0,0.57	1.0,0.398,1.0	0.419	0.0118917		54919	ENSG00000198925.11	ATG9A	SE	chr2	-	219225331-219225572:219227921-219228053:219229534-219229636	0.96,1.0,1.0	0.752,0.938,0.907	-0.121	0.00671149
54207	ENSG00000173166.17	RAPH1	SE	chr2	-	203461847-203461925:203470238-203470313:203477075-203477156	0.727,0.499,0.2	0.88,1.0,0.8	0.418	0.00199816		56303	ENSG00000130429.14	ARPC1B	SE	chr7	+	99374728-99374781:99376443-99376574:99377337-99377439	0.053,0.144,0.186	0.019,0.0,0.0	-0.121	0.00881018
67263	ENSG00000133794.17	ARNTL	SE	chr11	+	13309986-13310059:13326412-13326467:13354300-13354448	0.523,0.268,0.226	0.889,0.785,0.594	0.417	0.0138936		65551	ENSG00000165185.14	KIAA1958	SE	chr9	+	112486846-112487118:112574056-112575251:112645649-112645822	1.0,1.0,1.0	0.923,0.715,1.0	-0.121	0.0074363
43650	ENSG00000124574.14	ABCC10	SE	chr6	+	43427553-43427757:43430747-43430866:43432141-43432176	0.714,0.69,0.218	1.0,0.87,1.0	0.416	0.0363199		15751	ENSG00000189050.15	RNFT1	SE	chr17	-	59958290-59958444:59962539-59962616:59962826-59962966	1.0,1.0,0.767	0.725,0.676,1.0	-0.122	0.0200928
80468	ENSG00000180881.19	CAPS2	SE	chr12	-	75371078-75371482:75390321-75390381:75390837-75390901	0.322,0.416,0.0	0.74,0.543,0.704	0.416	0.0381866		22595	ENSG00000275052.4	PPP4R3B	SE	chr2	-	55568193-55568363:55573618-55573777:55577314-55577356	1.0,1.0,0.982	0.909,0.831,0.877	-0.122	1.03577e-05
100439	ENSG00000087085.14	ACHE	SE	chr7	-	100891168-100891338:100892686-100892818:100893164-100894233	0.15,0.117,1.0	1.0,1.0,0.515	0.416	0.00585562		67000	ENSG00000188747.8	NOXA1	SE	chr9	+	137428881-137429016:137429275-137429383:137430783-137430843	1.0,1.0,1.0	1.0,0.874,0.759	-0.122	0.0137242
28546	ENSG00000104723.20	TUSC3	SE	chr8	+	15673762-15673836:15743445-15743612:15764202-15764418	0.32,0.44,0.485	1.0,0.485,1.0	0.413	0.00289067		95202	ENSG00000095794.19	CREM	SE	chr10	+	35148367-35148491:35178871-35178986:35179133-35179276	1.0,1.0,0.92	0.794,0.949,0.811	-0.122	0.0254471
54445	ENSG00000157036.12	EXOG	SE	chr3	+	38499680-38499747:38500089-38500164:38501354-38501494	0.0,0.842,0.689	0.769,1.0,1.0	0.413	0.00476302		49238	ENSG00000176261.15	ZBTB8OS	SE	chr1	-	32627507-32627544:32633644-32633727:32650428-32650550	1.0,0.938,0.926	0.923,0.893,0.68	-0.123	0.0304569
71533	ENSG00000177225.16	GATD1	SE	chr11	-	767227-767368:770313-770398:770992-771104	0.267,1.0,0.241	0.741,1.0,1.0	0.411	0.0205422		59472	ENSG00000168679.17	SLC16A4	SE	chr1	-	110376949-110377161:110378852-110379356:110380981-110381143	0.936,1.0,0.94	0.709,0.939,0.858	-0.123	0.00961565
67074	ENSG00000127314.17	RAP1B	SE	chr12	+	68610907-68611052:68624674-68624873:68641037-68641153	0.658,0.461,0.461	1.0,0.811,1.0	0.41	0.000416323		61207	ENSG00000284770.1	TBCE	SE	chr1	+	235414432-235414618:235427139-235427239:235430704-235430780	0.962,0.965,0.97	0.804,0.966,0.758	-0.123	0.0129953
13934	ENSG00000263020.6	AL662899.2	SE	chr6	+	31669117-31669172:31670972-31671008:31671155-31671284	0.212,0.0,0.0	0.349,0.287,0.801	0.408	0.00562446		73040	ENSG00000198830.10	HMGN2	SE	chr1	+	26472516-26472627:26473702-26473817:26474084-26474135	1.0,1.0,0.93	0.798,1.0,0.762	-0.123	0.0063952
76664	ENSG00000214548.16	MEG3	SE	chr14	+	100831015-100831094:100835735-100835879:100836166-100836300	0.521,0.753,0.504	1.0,1.0,1.0	0.407	2.20401e-06		516	ENSG00000102034.16	ELF4	SE	chrX	-	130074580-130074752:130081255-130081312:130110619-130110716	0.944,0.904,0.986	0.768,0.787,0.907	-0.124	0.00185786
28149	ENSG00000143207.20	COP1	SE	chr1	-	176149005-176149074:176175909-176176007:176206571-176206691	0.311,0.475,1.0	1.0,1.0,1.0	0.405	0.00145824		13699	ENSG00000147852.15	VLDLR	SE	chr9	+	2650369-2650516:2651414-2651498:2651873-2651954	0.542,0.574,0.621	0.476,0.453,0.437	-0.124	0.000580159
72218	ENSG00000246273.7	SBF2-AS1	SE	chr11	+	9775730-9775765:9780375-9780575:9807847-9808038	0.146,0.631,0.316	0.847,0.587,0.872	0.404	0.0257057		45226	ENSG00000166025.17	AMOTL1	SE	chr11	+	94728920-94729055:94740937-94740988:94795010-94795160	1.0,1.0,0.906	0.739,1.0,0.796	-0.124	0.0373756
78653	ENSG00000166707.10	ZCCHC18	SE	chrX	+	104113194-104113246:104113433-104113573:104115251-104115842	0.325,1.0,0.462	1.0,1.0,1.0	0.404	0.000337233		73486	ENSG00000172716.16	SLFN11	SE	chr17	-	35366946-35367043:35367540-35367700:35373473-35373620	0.981,0.898,1.0	0.905,0.841,0.761	-0.124	0.000733842
88046	ENSG00000128915.11	ICE2	SE	chr15	-	60477936-60478069:60478567-60478650:60479071-60479132	0.517,0.658,0.176	1.0,1.0,0.562	0.404	0.0235487		94338	ENSG00000154803.12	FLCN	SE	chr17	-	17219018-17219209:17222500-17222661:17226175-17226322	1.0,1.0,1.0	1.0,0.794,0.833	-0.124	0.00659655
11079	ENSG00000159433.11	STARD9	SE	chr15	+	42575658-42575762:42583345-42583415:42634855-42634972	1.0,0.544,0.254	1.0,1.0,1.0	0.401	0.000736786		93586	ENSG00000139990.17	DCAF5	SE	chr14	-	69122216-69122360:69149430-69149503:69152943-69153040	0.134,0.066,0.201	0.0,0.0,0.027	-0.125	0.00378739
83806	ENSG00000244306.11	DUXAP10	SE	chr14	-	19268852-19269380:19307020-19307111:19331481-19331617	0.713,0.848,0.237	1.0,1.0,1.0	0.401	0.0251558		79013	ENSG00000050426.15	LETMD1	SE	chr12	+	51052087-51052207:51053777-51053860:51056143-51056245	1.0,1.0,1.0	0.914,0.861,0.848	-0.126	0.0192437
84278	ENSG00000196497.16	IPO4	SE	chr14	-	24181512-24181617:24182277-24182423:24182791-24182842	0.431,0.574,0.431	0.639,1.0,1.0	0.401	0.0467008		81135	ENSG00000076555.15	ACACB	SE	chr12	+	109206709-109206856:109209164-109209353:109212835-109212936	1.0,0.917,1.0	0.807,0.925,0.806	-0.126	0.0153208
102227	ENSG00000174165.7	ZDHHC24	SE	chr11	-	66521081-66521466:66526935-66527006:66543703-66543981	0.0,0.0,0.0	0.504,0.289,0.404	0.399	0.000507987		25000	ENSG00000128581.15	IFT22	SE	chr7	-	101316339-101316542:101318955-101319032:101321670-101321777	0.838,0.92,0.844	0.773,0.663,0.784	-0.127	0.00696774
68596	ENSG00000256061.7	DNAAF4	SE	chr15	-	55439471-55439581:55450221-55450367:55491122-55491256	0.503,0.0,0.558	1.0,0.503,0.752	0.398	0.00847549		29500	ENSG00000122085.16	MTERF4	SE	chr2	-	241094276-241094432:241095129-241096438:241097242-241097427	0.723,0.772,0.714	0.615,0.589,0.625	-0.127	0.0199612
81353	ENSG00000089022.13	MAPKAPK5	SE	chr12	+	111841977-111842769:111867571-111867669:111871084-111871180	0.809,0.547,0.0	1.0,0.547,1.0	0.397	0.0251178		93774	ENSG00000166444.18	ST5	SE	chr11	-	8811246-8811335:8831555-8831688:8871333-8871367	1.0,0.679,1.0	0.538,0.76,1.0	-0.127	0.020027
67979	ENSG00000225077.3	LINC00337	SE	chr1	+	6237244-6237345:6237469-6237848:6238220-6239408	0.509,1.0,0.311	1.0,1.0,1.0	0.393	0.000733842		103063	ENSG00000197586.12	ENTPD6	SE	chr20	+	25195700-25195867:25206521-25206590:25209848-25209925	0.529,0.592,0.544	0.397,0.433,0.453	-0.127	0.00177127
13392	ENSG00000172765.17	TMCC1	SE	chr3	-	129848345-129848412:129860939-129861012:129893493-129893606	1.0,0.402,0.0	0.573,1.0,1.0	0.39	0.0410003		6503	ENSG00000133627.17	ACTR3B	SE	chr7	+	152801620-152801731:152811696-152811733:152814549-152814645	0.154,0.265,0.114	0.076,0.014,0.06	-0.128	0.00254744
34589	ENSG00000173599.13	PC	SE	chr11	-	66954248-66954436:66957868-66957996:66958321-66958344	0.0,0.212,0.0	0.574,0.518,0.278	0.386	0.0382896		65038	ENSG00000100038.19	TOP3B	SE	chr22	-	21975639-21975807:21975904-21976187:21982729-21982793	0.251,0.284,0.31	0.167,0.156,0.139	-0.128	0.0149088
92588	ENSG00000085276.17	MECOM	SE	chr3	-	169102059-169102226:169107925-169107952:169112786-169112874	0.145,0.0,0.22	0.856,0.361,0.297	0.383	0.0335814		844	ENSG00000165240.19	ATP7A	SE	chrX	+	77910739-77910835:77922998-77923052:77971620-77971761	0.134,0.227,0.05	0.0,0.024,0.0	-0.129	0.01369
51871	ENSG00000043093.13	DCUN1D1	SE	chr3	-	182963880-182964049:182965678-182965753:182980486-182980520	0.444,0.727,0.571	1.0,0.889,1.0	0.382	0.000833786		10581	ENSG00000007392.16	LUC7L	SE	chr16	-	208077-208188:227241-228402:229278-229451	1.0,1.0,1.0	0.612,1.0,1.0	-0.129	0.0443276
84900	ENSG00000072042.12	RDH11	SE	chr14	-	67690211-67690421:67692437-67692593:67695629-67695774	0.62,0.806,0.289	1.0,0.859,1.0	0.381	0.00185786		18968	ENSG00000162194.12	LBHD1	SE	chr11	-	62669640-62669803:62669881-62670165:62671239-62671540	0.861,1.0,1.0	0.938,1.0,0.537	-0.129	0.0398961
99704	ENSG00000171466.9	ZNF562	SE	chr19	-	9641807-9653881:9656546-9656653:9660719-9660874	0.505,0.823,0.538	1.0,1.0,1.0	0.378	3.45569e-05		23847	ENSG00000189171.14	S100A13	SE	chr1	-	153626319-153627598:153630449-153630656:153631010-153631360	0.205,0.0,0.279	0.027,0.051,0.019	-0.129	0.00253281
90292	ENSG00000213918.10	DNASE1	SE	chr16	+	3656637-3656753:3656963-3657111:3657186-3657341	0.601,0.601,0.667	1.0,1.0,1.0	0.377	0.000165125		55423	ENSG00000069956.11	MAPK6	SE	chr15	+	52019921-52020032:52042753-52042833:52045829-52046109	0.085,0.338,0.0	0.037,0.0,0.0	-0.129	0.0103628
100438	ENSG00000087085.14	ACHE	SE	chr7	-	100891168-100891338:100892333-100892818:100893164-100894252	0.135,0.32,1.0	1.0,1.0,0.585	0.377	0.00696774		66393	ENSG00000119383.19	PTPA	SE	chr9	+	129120512-129120610:129127963-129128068:129128984-129129110	0.84,0.865,0.87	0.737,0.766,0.686	-0.129	0.000858799
6374	ENSG00000114107.8	CEP70	SE	chr3	-	138537177-138537347:138572858-138572914:138591853-138591956	0.0,0.0,0.0	0.353,0.353,0.421	0.376	0.000607466		91714	ENSG00000173267.13	SNCG	SE	chr10	+	86959632-86959674:86959948-86960128:86962603-86962675	1.0,1.0,0.954	0.901,0.828,0.839	-0.129	0.00491295
26054	ENSG00000135541.20	AHI1	SE	chr6	-	135318518-135318616:135323161-135323324:135358131-135358187	0.462,0.694,0.724	1.0,1.0,1.0	0.373	3.61759e-05		30726	ENSG00000138696.10	BMPR1B	SE	chr4	+	95104407-95104567:95114719-95114827:95115684-95115789	0.823,1.0,1.0	0.744,0.846,0.844	-0.13	0.038046
61783	ENSG00000114416.17	FXR1	SE	chr3	+	180912301-180912736:180933333-180933386:180947864-180947936	0.269,1.0,0.0	0.596,0.787,1.0	0.371	0.0297242		56301	ENSG00000130429.14	ARPC1B	SE	chr7	+	99374729-99374781:99376432-99376574:99377337-99377439	0.051,0.139,0.268	0.0,0.068,0.0	-0.13	0.00846462
4479	ENSG00000172785.18	CBWD1	SE	chr9	-	134978-135030:146101-146158:154708-154795	0.367,0.266,0.591	0.591,1.0,0.743	0.37	0.0257057		86619	ENSG00000100330.15	MTMR3	SE	chr22	+	30019479-30020884:30022028-30022139:30022608-30022697	0.86,0.872,0.859	0.726,0.838,0.638	-0.13	0.0474593
143	ENSG00000126903.15	SLC10A3	SE	chrX	-	154487310-154489082:154489941-154490027:154490593-154490628	0.0,0.202,0.174	0.655,0.241,0.588	0.369	0.0285112		103053	ENSG00000197586.12	ENTPD6	SE	chr20	+	25195791-25195867:25196153-25196254:25207078-25207397	0.332,0.201,0.162	0.05,0.197,0.059	-0.13	0.0443143
43282	ENSG00000228812.7	LAMA5-AS1	SE	chr20	+	62353011-62353208:62355267-62355480:62356191-62356215	0.0,0.452,0.0	0.767,0.171,0.622	0.369	0.0346295		103697	ENSG00000166913.12	YWHAB	SE	chr20	+	44886878-44886978:44887544-44887742:44901530-44901833	1.0,0.973,1.0	0.891,0.765,0.928	-0.13	1.32675e-05
71219	ENSG00000125970.11	RALY	SE	chr20	+	34073818-34073866:34076701-34076815:34078504-34078553	1.0,0.221,0.274	1.0,0.586,1.0	0.364	0.0346295		6992	ENSG00000225177.5	FLJ46906	SE	chr6	+	138692547-138692617:138694392-138694547:138696596-138697288	0.869,0.803,0.804	0.673,0.622,0.789	-0.131	0.0379543
10130	ENSG00000270647.5	TAF15	SE	chr17	+	35809454-35809576:35824077-35824198:35834565-35834598	0.734,0.181,1.0	1.0,1.0,1.0	0.362	0.0446525		21086	ENSG00000163625.15	WDFY3	SE	chr4	-	84724425-84724594:84726860-84726911:84733381-84733609	0.835,0.917,0.964	0.792,0.706,0.826	-0.131	0.0264726
52803	ENSG00000115827.13	DCAF17	SE	chr2	+	171468887-171469030:171473865-171473975:171477986-171478070	0.76,0.697,0.0	0.535,1.0,1.0	0.359	0.0484183		83114	ENSG00000136100.13	VPS36	SE	chr13	-	52416016-52416093:52417991-52418056:52423573-52423639	0.907,1.0,1.0	0.874,0.699,0.941	-0.131	0.0158699
89622	ENSG00000100983.10	GSS	SE	chr20	-	34936942-34937023:34942487-34942585:34942930-34942980	1.0,0.256,0.475	1.0,0.809,1.0	0.359	0.00924938		27950	ENSG00000164941.13	INTS8	SE	chr8	+	94836523-94836631:94838493-94838618:94841490-94841591	1.0,1.0,0.91	0.7,0.886,0.929	-0.132	0.0189813
85318	ENSG00000117859.18	OSBPL9	SE	chr1	+	51651990-51652041:51669433-51669814:51714002-51714079	0.747,0.529,0.29	1.0,0.797,0.842	0.358	0.0148934		36943	ENSG00000227036.7	LINC00511	SE	chr17	-	72403321-72404816:72420699-72420964:72428235-72428298	0.358,0.231,0.305	0.185,0.165,0.149	-0.132	2.30531e-05
30322	ENSG00000160688.18	FLAD1	SE	chr1	+	154983372-154984066:154990158-154990257:154992564-154992673	0.706,0.474,0.231	0.474,1.0,1.0	0.354	0.0248286		52512	ENSG00000173402.11	DAG1	SE	chr3	+	49476848-49476905:49487253-49487415:49488625-49488745	1.0,1.0,1.0	0.928,0.901,0.774	-0.132	0.0059416
41606	ENSG00000205221.12	VIT	SE	chr2	+	36773790-36773847:36775001-36775067:36781726-36781771	0.409,0.708,0.708	0.884,1.0,1.0	0.353	0.0158699		95663	ENSG00000198496.11	NBR2	SE	chr17	+	43125609-43125770:43131207-43131270:43138656-43138922	1.0,1.0,0.934	0.956,0.828,0.753	-0.132	0.00375704
94557	ENSG00000108641.15	B9D1	SE	chr17	-	19371235-19371633:19372114-19372224:19377858-19377890	0.0,0.0,0.0	0.223,0.301,0.535	0.353	0.025417		99899	ENSG00000129351.17	ILF3	SE	chr19	+	10683916-10683970:10684415-10684476:10688549-10688678	0.653,0.607,0.635	0.513,0.475,0.511	-0.132	8.36866e-05
33789	ENSG00000100614.17	PPM1A	SE	chr14	+	60250430-60250481:60268292-60268435:60282683-60283266	0.0,0.0,0.0	0.338,0.0,0.718	0.352	0.00978249		101666	ENSG00000105419.17	MEIS3	SE	chr19	-	47414716-47414815:47415050-47415101:47416651-47416702	1.0,1.0,0.968	0.887,0.773,0.913	-0.132	0.000243019
37037	ENSG00000231584.8	FAHD2CP	SE	chr2	+	96010613-96010732:96015108-96015325:96019200-96019260	0.263,0.328,0.337	0.671,0.525,0.776	0.348	0.0335814		39324	ENSG00000263528.7	IKBKE	SE	chr1	+	206471155-206471245:206473195-206473314:206474330-206474471	0.924,0.943,1.0	0.897,0.762,0.809	-0.133	0.00666995
38216	ENSG00000145247.11	OCIAD2	SE	chr4	-	48892832-48892889:48897803-48897835:48904483-48904611	0.664,0.787,0.507	1.0,1.0,1.0	0.347	0.000134562		51455	ENSG00000182901.16	RGS7	SE	chr1	-	240775514-240776213:240801454-240801508:240802903-240802993	0.29,0.0,0.109	0.0,0.0,0.0	-0.133	0.041682
15598	ENSG00000152705.7	CATSPER3	SE	chr5	+	134996272-134996512:135008840-135008981:135009370-135009490	0.407,0.822,0.073	1.0,0.339,1.0	0.346	0.0440267		51654	ENSG00000082258.12	CCNT2	SE	chr2	+	134942611-134942674:134945888-134945975:134946100-134946146	0.256,0.095,0.048	0.0,0.0,0.0	-0.133	0.00613203
94558	ENSG00000108641.15	B9D1	SE	chr17	-	19371559-19371633:19372114-19372239:19377858-19378193	0.0,0.0,0.0	0.214,0.29,0.521	0.342	0.0293973		54109	ENSG00000010810.17	FYN	SE	chr6	-	111780565-111780635:111846588-111846629:111872967-111873037	0.92,0.829,0.811	0.805,0.658,0.694	-0.134	0.0328518
99021	ENSG00000283103.1	AC010642.2	SE	chr19	-	58310448-58312288:58312969-58313113:58314805-58315036	1.0,0.504,0.478	1.0,1.0,1.0	0.339	0.00629196		90412	ENSG00000168096.14	ANKS3	SE	chr16	-	4726658-4726780:4726978-4727177:4729979-4730151	0.946,0.946,0.964	0.835,0.777,0.842	-0.134	6.40545e-06
65890	ENSG00000106070.18	GRB10	SE	chr7	-	50703820-50703908:50727792-50727890:50780626-50780736	0.585,0.43,0.446	0.475,1.0,1.0	0.338	0.021069		32592	ENSG00000100483.13	VCPKMT	SE	chr14	-	50109536-50109713:50114284-50114404:50115838-50115911	1.0,1.0,0.961	0.906,0.649,1.0	-0.135	0.0369003
75279	ENSG00000172965.15	MIR4435-2HG	SE	chr2	-	111367486-111367575:111477335-111477481:111479906-111480061	0.78,0.387,0.82	1.0,1.0,1.0	0.338	0.0109233		36478	ENSG00000198825.13	INPP5F	SE	chr10	+	119791868-119792036:119792156-119792211:119796714-119796913	1.0,1.0,1.0	1.0,0.594,1.0	-0.135	0.0374819
46517	ENSG00000134909.18	ARHGAP32	SE	chr11	-	129123445-129123530:129123887-129123929:129124802-129124894	0.141,0.206,0.305	0.449,0.661,0.548	0.335	0.0192475		17290	ENSG00000137210.13	TMEM14B	SE	chr6	+	10747758-10747881:10770076-10770204:10829006-10829165	1.0,1.0,1.0	0.617,1.0,0.974	-0.136	0.0111483
31571	ENSG00000068745.14	IP6K2	SE	chr3	-	48708119-48708237:48715314-48715527:48717156-48717188	0.277,0.535,0.279	0.812,0.774,0.507	0.334	0.0451072		34695	ENSG00000009709.11	PAX7	SE	chr1	+	18631005-18631688:18634302-18634538:18635110-18635240	1.0,1.0,1.0	0.73,0.949,0.913	-0.136	0.0209355
22285	ENSG00000168036.17	CTNNB1	SE	chr3	+	41199712-41199807:41222333-41222345:41224020-41224081	0.0,0.0,1.0	1.0,1.0,0.0	0.333	0.000717779		50079	ENSG00000235257.8	ITGA9-AS1	SE	chr3	-	37821013-37821100:37834678-37834767:37851423-37851450	0.949,1.0,1.0	0.918,1.0,0.622	-0.136	0.019633
52224	ENSG00000008394.12	MGST1	SE	chr12	+	16347644-16347710:16354230-16354270:16357604-16357699	0.33,0.305,0.525	0.78,0.626,0.754	0.333	0.00481599		103393	ENSG00000101019.21	UQCC1	SE	chr20	-	35374183-35374256:35384037-35384133:35392235-35392277	1.0,1.0,1.0	1.0,0.591,1.0	-0.136	0.0317039
64372	ENSG00000108352.12	RAPGEFL1	SE	chr17	+	40178248-40178381:40181298-40181373:40181615-40181694	1.0,0.0,0.0	1.0,0.0,1.0	0.333	0.000607466		14899	ENSG00000086758.15	HUWE1	SE	chrX	-	53625156-53625258:53625785-53626034:53627409-53627515	0.741,0.742,0.715	0.588,0.608,0.591	-0.137	0.000165125
71752	ENSG00000182973.18	CNOT10	SE	chr3	+	32764681-32764809:32765049-32765177:32773456-32773616	1.0,0.0,0.0	1.0,1.0,0.0	0.333	0.0291869		36946	ENSG00000227036.7	LINC00511	SE	chr17	-	72403321-72404816:72420699-72421066:72428235-72428298	0.331,0.2,0.278	0.143,0.136,0.12	-0.137	4.45533e-07
17359	ENSG00000184640.17	SEPT9	SE	chr17	+	77280568-77280806:77294773-77294903:77307140-77307197	0.243,0.13,0.078	0.634,0.263,0.546	0.331	0.0209355		93924	ENSG00000161955.16	TNFSF13	SE	chr17	+	7558292-7558375:7559067-7559297:7559623-7559702	1.0,1.0,1.0	0.9,1.0,0.69	-0.137	0.0138883
82806	ENSG00000102780.16	DGKH	SE	chr13	+	42129551-42129632:42153749-42153915:42155290-42155395	0.0,0.0,0.0	0.321,0.351,0.321	0.331	0.000248415		29287	ENSG00000103148.15	NPRL3	SE	chr16	-	112621-112775:117300-117375:119125-119255	0.657,0.589,0.666	0.459,0.447,0.593	-0.138	0.0222682
88409	ENSG00000138604.9	GLCE	SE	chr15	+	69160583-69160757:69194435-69194525:69210315-69210406	0.294,0.082,0.135	0.555,0.442,0.499	0.328	0.00603591		70994	ENSG00000076043.9	REXO2	SE	chr11	+	114439385-114439675:114447825-114447879:114449845-114449909	0.911,0.893,0.859	0.759,0.74,0.751	-0.138	0.0114044
74790	ENSG00000105676.13	ARMC6	SE	chr19	+	19034130-19034238:19037551-19037707:19042715-19042877	0.122,0.0,0.043	0.394,0.494,0.246	0.323	0.00386189		73392	ENSG00000149187.18	CELF1	SE	chr11	-	47468813-47468891:47471997-47472102:47472190-47472357	0.594,0.691,0.572	0.479,0.484,0.479	-0.138	0.0496345
38621	ENSG00000239521.8	CASTOR3	SE	chr7	-	100200652-100202603:100213046-100213133:100222596-100222720	0.587,0.558,0.513	1.0,0.612,1.0	0.318	0.03384		83331	ENSG00000139746.15	RBM26	SE	chr13	-	79344668-79344794:79353152-79353224:79354438-79354561	0.357,0.296,0.198	0.15,0.163,0.123	-0.138	0.0375013
40485	ENSG00000174197.16	MGA	SE	chr15	+	41621223-41621298:41668827-41669958:41696074-41697023	0.399,0.728,0.833	0.908,1.0,1.0	0.316	0.000414109		16459	ENSG00000081189.15	MEF2C	SE	chr5	-	88823734-88823927:88880923-88881022:88882954-88883227	0.348,0.0,0.07	0.0,0.0,0.0	-0.139	0.00967274
83142	ENSG00000250299.6	MRPS31P4	SE	chr13	+	52627437-52627578:52629218-52629359:52632421-52632494	0.395,0.545,0.4	0.782,0.625,0.874	0.314	0.0391322		67560	ENSG00000103197.17	TSC2	SE	chr16	+	2076490-2076585:2077597-2077726:2079031-2079196	0.285,0.311,0.374	0.146,0.196,0.211	-0.139	0.000171415
37852	ENSG00000197321.14	SVIL	SE	chr10	-	29532528-29533458:29535988-29536069:29550596-29551263	0.602,1.0,0.463	1.0,1.0,1.0	0.312	0.0237203		79359	ENSG00000135424.16	ITGA7	SE	chr12	-	55698709-55698917:55699869-55699989:55700261-55700393	0.937,1.0,0.927	0.846,0.743,0.857	-0.139	0.00394001
85101	ENSG00000186566.12	GPATCH8	SE	chr17	-	44436477-44436545:44467096-44467114:44474828-44474903	0.0,0.0,0.0	0.308,0.527,0.1	0.312	0.00813808		53937	ENSG00000104133.14	SPG11	SE	chr15	-	44570524-44570658:44573546-44573745:44583813-44584558	1.0,1.0,1.0	0.72,0.861,1.0	-0.14	0.0345305
17700	ENSG00000181458.10	TMEM45A	SE	chr3	+	100492659-100492928:100519532-100519608:100558404-100558527	0.469,0.598,1.0	1.0,1.0,1.0	0.311	0.00177127		59100	ENSG00000177542.10	SLC25A22	SE	chr11	-	794986-795169:796042-796367:798216-798267	0.357,0.396,0.4	0.245,0.226,0.262	-0.14	3.2854e-05
62956	ENSG00000162542.13	TMCO4	SE	chr1	-	19787025-19787117:19798136-19798215:19799173-19799344	0.662,0.586,0.735	1.0,0.915,1.0	0.311	3.45569e-05		65753	ENSG00000148180.19	GSN	SE	chr9	+	121297765-121297842:121300055-121300126:121301962-121302149	1.0,1.0,0.942	0.811,0.709,1.0	-0.141	0.0338577
80834	ENSG00000073584.19	SMARCE1	SE	chr17	-	40627780-40629568:40630207-40630286:40630713-40630924	0.863,0.782,0.424	1.0,1.0,1.0	0.31	5.92319e-05		66643	ENSG00000165698.15	SPACA9	SE	chr9	+	132883910-132884091:132887368-132887571:132888289-132888437	1.0,1.0,1.0	0.856,0.905,0.816	-0.141	0.0437865
97753	ENSG00000154655.15	L3MBTL4	SE	chr18	-	5960093-5960156:5969392-5969562:6093354-6093528	0.7,0.483,0.894	1.0,1.0,1.0	0.308	0.0196948		99691	ENSG00000171469.10	ZNF561	SE	chr19	-	9614020-9614103:9617048-9617171:9618090-9618179	1.0,1.0,0.923	0.719,1.0,0.781	-0.141	0.048869
30117	ENSG00000166169.16	POLL	SE	chr10	-	101585861-101586156:101587121-101587200:101588203-101588248	0.45,1.0,0.395	1.0,1.0,0.766	0.307	0.00959714		31510	ENSG00000220804.8	LINC01881	SE	chr2	+	242118964-242119057:242122286-242122455:242138783-242138888	0.849,1.0,1.0	0.868,0.714,0.838	-0.143	0.0443566
95191	ENSG00000095794.19	CREM	SE	chr10	+	35127456-35127567:35137781-35137879:35148367-35148491	0.547,0.585,0.501	1.0,1.0,0.547	0.305	0.0107193		34752	ENSG00000109670.14	FBXW7	SE	chr4	-	152350041-152350124:152411302-152411872:152534940-152536063	1.0,1.0,1.0	0.946,0.859,0.765	-0.143	0.00175852
40643	ENSG00000109680.10	TBC1D19	SE	chr4	+	26583915-26584292:26613168-26613241:26614407-26614453	0.502,0.484,1.0	0.897,1.0,1.0	0.304	0.00438551		47618	ENSG00000178234.12	GALNT11	SE	chr7	+	152094189-152094522:152100824-152100921:152103111-152103174	0.913,0.923,1.0	0.863,0.791,0.752	-0.143	0.021177
70350	ENSG00000156398.12	SFXN2	SE	chr10	+	102716233-102716329:102716613-102716711:102726611-102726777	0.576,0.633,0.883	1.0,1.0,1.0	0.303	0.000101122		65242	ENSG00000106785.14	TRIM14	SE	chr9	-	98084354-98088005:98091908-98092001:98099930-98099976	0.931,0.947,0.891	0.837,0.702,0.801	-0.143	0.00724846
17026	ENSG00000183474.15	GTF2H2C	SE	chr5	+	69566966-69567053:69567726-69567777:69572444-69572550	0.788,0.566,0.492	1.0,0.749,1.0	0.301	0.00219237		23230	ENSG00000088543.14	C3orf18	SE	chr3	-	50558024-50559737:50565465-50565861:50567462-50567665	1.0,0.95,0.938	0.939,0.732,0.784	-0.144	0.0443241
33031	ENSG00000181396.12	OGFOD3	SE	chr17	-	82406417-82406482:82411454-82411530:82418405-82418588	0.726,0.469,0.548	0.638,1.0,1.0	0.298	0.0443276		21049	ENSG00000145332.13	KLHL8	SE	chr4	-	87183202-87183389:87195323-87195690:87220417-87220463	1.0,1.0,1.0	1.0,0.905,0.66	-0.145	0.0135395
83586	ENSG00000184916.8	JAG2	SE	chr14	-	105150864-105150911:105150990-105151104:105151282-105151396	0.872,0.665,0.569	1.0,1.0,1.0	0.298	0.0170422		37814	ENSG00000103121.8	CMC2	SE	chr16	-	80975801-80976179:80980769-80980879:80997313-80997429	0.752,0.674,0.709	0.539,0.551,0.609	-0.145	0.00961565
36353	ENSG00000092199.17	HNRNPC	SE	chr14	-	21212959-21213117:21230957-21231072:21269297-21269409	0.0,0.158,0.0	0.53,0.414,0.101	0.296	0.00649051		50550	ENSG00000042088.13	TDP1	SE	chr14	+	89956036-89956278:89956577-89956800:89963107-89963552	0.753,0.718,0.687	0.589,0.588,0.546	-0.145	0.0124469
46781	ENSG00000168661.14	ZNF30	SE	chr19	+	34933627-34933723:34942593-34942673:34943222-34945168	0.796,0.619,0.465	1.0,1.0,0.765	0.295	0.0187285		72215	ENSG00000246273.7	SBF2-AS1	SE	chr11	+	9775644-9775765:9779816-9779942:9780375-9780575	1.0,0.0,1.0	0.0,1.0,0.565	-0.145	0.0345568
89655	ENSG00000167733.13	HSD11B1L	SE	chr19	+	5684780-5684905:5684988-5685119:5687281-5687304	0.29,0.615,1.0	1.0,1.0,0.788	0.294	0.0126278		82885	ENSG00000170919.15	TPT1-AS1	SE	chr13	+	45379194-45380001:45383090-45383235:45389734-45389820	1.0,0.859,1.0	0.912,0.743,0.77	-0.145	0.0190646
1664	ENSG00000184319.15	RPL23AP82	SE	chr22	+	50756947-50757326:50783119-50783294:50785172-50785293	0.656,0.885,0.58	1.0,1.0,1.0	0.293	0.000127747		96003	ENSG00000171574.17	ZNF584	SE	chr19	+	58401570-58401662:58409964-58410091:58415523-58415646	0.96,1.0,1.0	0.818,0.85,0.856	-0.145	0.00109843
27878	ENSG00000254641.1	AC091564.3	SE	chr11	-	6608666-6608725:6608836-6608978:6609907-6610135	0.0,0.0,0.0	0.0,0.406,0.473	0.293	0.00281427		38098	ENSG00000214013.9	GANC	SE	chr15	+	42327362-42327442:42329305-42329449:42330575-42330672	0.967,0.97,0.864	0.753,0.841,0.77	-0.146	0.0341053
55176	ENSG00000188501.11	LCTL	SE	chr15	-	66550040-66550104:66551661-66551861:66552042-66552169	0.142,0.275,0.419	0.621,0.532,0.562	0.293	0.0433154		85153	ENSG00000072415.8	MPP5	SE	chr14	+	67241341-67241533:67254203-67254310:67269700-67269764	0.109,0.127,0.241	0.023,0.015,0.0	-0.146	8.36866e-05
85438	ENSG00000119661.14	DNAL1	SE	chr14	+	73644874-73645042:73661986-73662042:73671541-73671597	0.645,0.476,1.0	1.0,1.0,1.0	0.293	0.0255692		43803	ENSG00000121775.17	TMEM39B	SE	chr1	+	32075602-32075822:32077163-32077318:32091674-32091744	0.633,0.583,0.555	0.394,0.469,0.467	-0.147	0.0121673
97096	ENSG00000129646.14	QRICH2	SE	chr17	-	76287799-76287897:76289991-76290077:76291014-76291252	0.792,0.514,0.717	1.0,0.899,1.0	0.292	0.00451457		82376	ENSG00000128699.13	ORMDL1	SE	chr2	-	189782421-189782602:189783013-189783123:189784268-189784371	0.507,0.487,0.517	0.303,0.307,0.459	-0.147	0.0394946
20620	ENSG00000156170.12	NDUFAF6	SE	chr8	+	94895812-94895927:94945482-94945619:94957994-94958179	0.0,0.0,0.0	0.0,0.258,0.61	0.289	0.0171375		14843	ENSG00000197008.9	ZNF138	SE	chr7	+	64794387-64794571:64814917-64815044:64831450-64832242	1.0,0.844,1.0	0.764,0.739,0.896	-0.148	0.0251328
17514	ENSG00000242802.7	AP5Z1	SE	chr7	+	4781174-4781312:4783315-4783460:4784202-4784371	0.82,0.603,0.537	0.921,1.0,0.901	0.287	0.00649071		60296	ENSG00000214021.15	TTLL3	SE	chr3	+	9828959-9829395:9834680-9834907:9835093-9835208	1.0,1.0,1.0	0.809,0.748,1.0	-0.148	0.0275189
53831	ENSG00000188690.13	UROS	SE	chr10	-	125796102-125796188:125796789-125796861:125797411-125797425	0.628,0.479,0.702	0.844,0.825,1.0	0.287	0.0051757		90799	ENSG00000196387.9	ZNF140	SE	chr12	+	133079837-133081072:133081272-133081329:133083102-133083229	1.0,0.975,1.0	0.892,0.817,0.82	-0.149	0.00010874
47219	ENSG00000117155.16	SSX2IP	SE	chr1	-	84670645-84670815:84671188-84671308:84680337-84680387	0.675,1.0,0.356	1.0,0.882,1.0	0.284	0.0243813		91633	ENSG00000125503.12	PPP1R12C	SE	chr19	-	55096050-55096178:55103408-55103568:55117222-55117413	1.0,1.0,1.0	0.918,0.867,0.768	-0.149	0.000466059
57028	ENSG00000151576.10	QTRT2	SE	chr3	+	114056736-114056864:114056998-114057106:114070625-114070838	0.794,0.525,0.784	1.0,1.0,0.942	0.28	7.04646e-05		73496	ENSG00000172716.16	SLFN11	SE	chr17	-	35366946-35367043:35367649-35367700:35373473-35373620	0.981,0.897,1.0	0.89,0.811,0.726	-0.15	0.000473809
63530	ENSG00000186638.16	KIF24	SE	chr9	-	34263100-34263172:34271808-34271930:34306251-34306441	0.658,0.794,0.524	0.815,1.0,1.0	0.28	0.020216		77738	ENSG00000088387.18	DOCK9	SE	chr13	-	98837493-98837609:98845328-98845372:98845923-98846060	0.395,0.0,0.162	0.0,0.106,0.0	-0.15	0.0192649
80032	ENSG00000177990.11	DPY19L2	SE	chr12	-	63660894-63661481:63663757-63663845:63668056-63668577	0.611,0.79,0.759	1.0,1.0,1.0	0.28	0.0213655		38864	ENSG00000073331.17	ALPK1	SE	chr4	+	112377677-112377898:112382397-112382552:112411826-112412025	1.0,0.915,1.0	1.0,0.581,0.88	-0.151	0.0383994
82344	ENSG00000180776.15	ZDHHC20	SE	chr13	-	21413651-21413772:21425651-21425678:21459053-21459248	0.559,0.458,1.0	0.856,1.0,1.0	0.28	0.04625		40104	ENSG00000182919.14	C11orf54	SE	chr11	+	93741590-93741728:93747296-93747448:93750345-93750444	1.0,0.908,1.0	0.955,0.712,0.788	-0.151	0.0111759
27142	ENSG00000213047.12	DENND1B	SE	chr1	-	197605481-197607174:197611930-197611976:197617658-197617759	0.632,1.0,0.534	1.0,1.0,1.0	0.278	0.031034		48530	ENSG00000168890.13	TMEM150A	SE	chr2	-	85601020-85601107:85601434-85601482:85601883-85602064	0.959,1.0,1.0	1.0,0.806,0.701	-0.151	0.00149285
15343	ENSG00000167460.15	TPM4	SE	chr19	+	16077020-16077130:16080914-16081075:16081912-16082046	0.375,0.569,1.0	0.771,1.0,1.0	0.276	0.00753365		79040	ENSG00000110925.6	CSRNP2	SE	chr12	-	51076620-51076647:51081427-51081461:51082520-51082627	0.0,0.213,0.379	0.0,0.14,0.0	-0.151	0.0155324
73109	ENSG00000108387.14	SEPT4	SE	chr17	-	58526219-58526313:58526681-58526978:58531479-58531551	0.637,0.45,0.878	0.95,1.0,0.842	0.276	0.0251121		6032	ENSG00000010219.13	DYRK4	SE	chr12	+	4604913-4605086:4607326-4607387:4610154-4610284	0.589,0.578,0.466	0.376,0.396,0.406	-0.152	0.0240693
43910	ENSG00000157734.13	SNX22	SE	chr15	+	64151714-64151850:64152637-64152742:64153244-64153339	0.804,0.37,1.0	1.0,1.0,1.0	0.275	0.0252526		54722	ENSG00000277072.4	STAG3L2	SE	chr7	-	74884433-74884524:74885022-74885146:74888311-74888397	0.929,0.941,1.0	0.652,0.962,0.8	-0.152	0.0414931
97984	ENSG00000168675.18	LDLRAD4	SE	chr18	+	13387340-13387762:13484036-13484119:13621116-13621270	0.0,0.0,0.0	0.121,0.616,0.084	0.274	0.00748972		80042	ENSG00000123352.17	SPATS2	SE	chr12	+	49366904-49367587:49371227-49371290:49387053-49387137	1.0,1.0,1.0	1.0,0.711,0.831	-0.153	0.0103249
101213	ENSG00000223546.6	LINC00630	SE	chrX	+	102769160-102769341:102770351-102770420:102825992-102826169	1.0,0.506,0.672	1.0,1.0,1.0	0.274	0.0217302		9818	ENSG00000164828.17	SUN1	SE	chr7	+	843340-843520:849519-849603:851383-851482	0.816,0.76,0.74	0.668,0.598,0.589	-0.154	0.0109233
16961	ENSG00000234062.7	AL390879.1	SE	chrX	+	136909394-136909780:136921243-136922776:136925246-136925379	0.579,0.751,0.334	0.739,0.745,1.0	0.273	0.0286034		55628	ENSG00000183530.13	PRR14L	SE	chr22	-	31725537-31725610:31738386-31738911:31749992-31750131	1.0,1.0,1.0	0.903,0.837,0.797	-0.154	0.00163139
103443	ENSG00000088367.21	EPB41L1	SE	chr20	+	36092731-36092813:36109672-36109886:36112425-36112480	0.0,0.093,0.0	0.0,0.406,0.506	0.273	0.00860648		83941	ENSG00000100888.13	CHD8	SE	chr14	-	21428963-21429335:21430800-21431724:21431810-21431858	0.845,0.897,0.842	0.733,0.657,0.731	-0.154	0.00274125
30353	ENSG00000143393.16	PI4KB	SE	chr1	-	151307573-151307801:151310210-151310255:151326171-151326373	0.483,0.495,0.642	0.826,0.684,0.918	0.269	0.0100533		17390	ENSG00000164509.13	IL31RA	SE	chr5	+	55851495-55851633:55853321-55853567:55859508-55859599	0.299,0.378,0.299	0.177,0.248,0.087	-0.155	0.00367131
14926	ENSG00000162910.18	MRPL55	SE	chr1	-	228108234-228108321:228108436-228108474:228109148-228109306	0.285,0.125,0.347	0.503,0.535,0.523	0.268	0.030491		57001	ENSG00000111364.15	DDX55	SE	chr12	+	123602076-123602256:123605930-123605981:123607431-123607523	0.95,0.942,1.0	0.701,0.882,0.845	-0.155	0.0074363
65163	ENSG00000081377.16	CDC14B	SE	chr9	-	96534454-96534542:96539077-96539140:96562692-96562785	1.0,0.385,0.646	1.0,1.0,0.831	0.267	0.0246411		83940	ENSG00000100888.13	CHD8	SE	chr14	-	21428963-21429335:21430800-21431643:21431810-21431858	0.846,0.895,0.839	0.732,0.656,0.727	-0.155	0.00302003
66019	ENSG00000173611.17	SCAI	SE	chr9	-	124971670-124971844:124975246-124975389:124976113-124976186	0.0,0.06,0.0	0.505,0.078,0.277	0.267	0.00985132		27671	ENSG00000135636.13	DYSF	SE	chr2	+	71539156-71539239:71549349-71549391:71551040-71551156	0.157,0.51,0.238	0.438,0.0,0.0	-0.156	0.0203685
47338	ENSG00000135549.14	PKIB	SE	chr6	+	122633282-122633367:122675077-122675144:122717786-122717963	0.356,0.674,1.0	0.828,1.0,1.0	0.266	0.0127326		83747	ENSG00000130177.15	CDC16	SE	chr13	+	114234886-114235132:114236644-114236699:114236798-114236896	0.933,0.981,0.96	0.834,0.739,0.833	-0.156	4.87235e-07
1456	ENSG00000177189.13	RPS6KA3	SE	chrX	-	20240568-20240605:20241592-20241686:20266563-20266606	0.444,0.847,0.58	1.0,0.88,0.786	0.265	0.0121413		99437	ENSG00000087903.12	RFX2	SE	chr19	-	6026162-6026237:6039979-6040241:6110392-6110446	1.0,1.0,1.0	1.0,0.788,0.744	-0.156	0.0228545
61241	ENSG00000124532.14	MRS2	SE	chr6	+	24405167-24405241:24408407-24408444:24412221-24412395	0.647,0.892,0.526	1.0,0.954,0.906	0.265	0.00146559		49269	ENSG00000176261.15	ZBTB8OS	SE	chr1	-	32627507-32627544:32633950-32634110:32634767-32634792	0.675,0.645,0.612	0.53,0.488,0.444	-0.157	0.00665943
70042	ENSG00000149273.14	RPS3	SE	chr11	+	75399519-75399577:75401639-75401733:75404671-75404730	0.235,0.424,0.551	1.0,0.0,1.0	0.263	0.038718		67820	ENSG00000120539.14	MASTL	SE	chr10	+	27173117-27173259:27180952-27181066:27181479-27181581	1.0,1.0,0.921	0.716,0.908,0.826	-0.157	0.00330306
92472	ENSG00000112078.13	KCTD20	SE	chr6	+	36451533-36451632:36452563-36452680:36470051-36470257	0.0,0.0,0.0	0.157,0.272,0.359	0.263	0.0338422		4990	ENSG00000156787.16	TBC1D31	SE	chr8	+	123130197-123130333:123134113-123134206:123140760-123140901	1.0,1.0,1.0	0.618,1.0,0.908	-0.158	0.00491295
54097	ENSG00000010810.17	FYN	SE	chr6	-	111719804-111720062:111740980-111741093:111754433-111754677	0.63,0.587,1.0	1.0,1.0,1.0	0.261	0.0300625		49436	ENSG00000270820.5	AC016727.1	SE	chr2	+	61471748-61471808:61480324-61480583:61482626-61482720	1.0,1.0,0.594	0.549,1.0,0.572	-0.158	0.0311943
64309	ENSG00000188385.11	JAKMIP3	SE	chr10	+	132153912-132153990:132163208-132163412:132164669-132164735	0.52,0.76,0.823	1.0,0.878,1.0	0.258	0.00307709		66078	ENSG00000136856.17	SLC2A8	SE	chr9	+	127397141-127397286:127397375-127397538:127399906-127400006	0.731,0.66,0.74	0.579,0.569,0.51	-0.158	0.000593183
52559	ENSG00000186132.14	C2orf76	SE	chr2	-	119339826-119339971:119340158-119340361:119366356-119366682	0.7,1.0,0.53	1.0,1.0,1.0	0.257	0.0137242		5245	ENSG00000156162.16	DPY19L4	SE	chr8	+	94734629-94734754:94738368-94738459:94739412-94739534	1.0,1.0,0.956	0.713,0.893,0.872	-0.159	0.00528883
49254	ENSG00000176261.15	ZBTB8OS	SE	chr1	-	32627507-32627544:32633950-32634072:32650401-32650525	0.49,0.099,1.0	1.0,0.355,1.0	0.255	0.0139521		46508	ENSG00000005175.9	RPAP3	SE	chr12	-	47670106-47670345:47679492-47679594:47679703-47679774	0.922,0.948,0.974	0.728,0.786,0.853	-0.159	0.00637972
58320	ENSG00000180376.16	CCDC66	SE	chr3	+	56559568-56559594:56560861-56561012:56561256-56561378	0.554,0.691,1.0	1.0,1.0,1.0	0.252	0.0207702		54555	ENSG00000128989.10	ARPP19	SE	chr15	-	52557099-52557222:52564189-52564246:52568288-52568832	1.0,0.685,1.0	0.653,0.771,0.783	-0.159	0.034426
17044	ENSG00000152942.18	RAD17	SE	chr5	+	69371034-69371171:69371453-69371557:69373829-69374087	0.144,0.0,0.0	0.371,0.227,0.3	0.251	0.00635489		88391	ENSG00000260007.3	AC107871.1	SE	chr15	-	68191129-68194112:68197439-68197628:68218535-68218650	0.891,0.986,0.983	0.745,0.882,0.756	-0.159	3.61759e-05
37199	ENSG00000117569.18	PTBP2	SE	chr1	+	96804784-96804939:96806418-96806452:96806865-96806958	0.0,0.111,0.0	0.213,0.119,0.533	0.251	0.00883757		43785	ENSG00000114098.17	ARMC8	SE	chr3	+	138188400-138188530:138209816-138209893:138221925-138221997	0.842,0.752,0.738	0.594,0.645,0.614	-0.16	0.0434081
67011	ENSG00000148399.12	DPH7	SE	chr9	-	137565084-137565154:137574751-137574846:137576079-137576167	0.647,0.667,0.594	0.928,1.0,0.733	0.251	0.00606764		67464	ENSG00000118961.14	LDAH	SE	chr2	-	20790254-20790398:20801309-20801465:20823036-20823101	1.0,0.94,0.935	0.761,0.724,0.911	-0.16	0.00324089
22101	ENSG00000261832.6	AC138894.1	SE	chr16	-	28484005-28484118:28487455-28487541:28489289-28489386	0.777,0.266,1.0	1.0,1.0,0.792	0.25	0.0162981		18965	ENSG00000162194.12	LBHD1	SE	chr11	-	62669640-62669803:62669881-62670015:62671239-62671388	0.787,1.0,1.0	0.863,1.0,0.441	-0.161	0.0274319
34369	ENSG00000204120.14	GIGYF2	SE	chr2	+	232697351-232697392:232731121-232731258:232735154-232735238	0.0,0.148,0.0	0.385,0.0,0.51	0.249	0.00850465		98561	ENSG00000185404.16	SP140L	SE	chr2	+	230327183-230327301:230328756-230328831:230357804-230357967	0.944,0.925,0.976	0.8,0.779,0.782	-0.161	0.00946833
95492	ENSG00000115084.13	SLC35F5	SE	chr2	-	113714646-113715195:113717752-113717848:113719153-113719244	0.92,0.664,0.527	1.0,0.924,0.933	0.249	0.00220782		27998	ENSG00000131095.12	GFAP	SE	chr17	-	44903160-44903559:44904441-44904554:44908063-44908149	1.0,1.0,0.82	1.0,0.686,0.649	-0.162	0.0310403
101057	ENSG00000188766.12	SPRED3	SE	chr19	+	38388420-38388807:38390298-38390479:38391945-38392114	0.599,0.618,0.551	0.828,0.796,0.888	0.248	0.0089716		73393	ENSG00000149187.18	CELF1	SE	chr11	-	47470293-47470555:47471997-47472102:47472190-47472357	0.789,0.683,0.722	0.618,0.492,0.598	-0.162	0.021454
48697	ENSG00000177565.16	TBL1XR1	SE	chr3	-	177098486-177098541:177110808-177110887:177131362-177131449	0.0,0.246,0.0	0.359,0.495,0.133	0.247	0.00643824		76756	ENSG00000149428.18	HYOU1	SE	chr11	-	119056069-119056167:119056278-119056418:119057074-119057142	0.137,0.256,0.132	0.0,0.0,0.038	-0.162	0.00113103
99712	ENSG00000171466.9	ZNF562	SE	chr19	-	9652278-9653881:9659378-9659467:9660719-9660821	0.61,0.898,0.75	1.0,1.0,1.0	0.247	0.000596246		78297	ENSG00000131115.15	ZNF227	SE	chr19	+	44228445-44228572:44229732-44229816:44234701-44234835	0.927,1.0,1.0	0.644,0.879,0.918	-0.162	0.00175852
10829	ENSG00000172594.12	SMPDL3A	SE	chr6	+	122804908-122805089:122806232-122806357:122809090-122809717	0.545,1.0,0.717	1.0,1.0,1.0	0.246	0.00370017		68812	ENSG00000126456.15	IRF3	SE	chr19	-	49663342-49663514:49664552-49664673:49665630-49665788	0.904,0.937,0.776	0.768,0.688,0.672	-0.163	0.0119022
11082	ENSG00000159433.11	STARD9	SE	chr15	+	42575658-42575762:42585520-42585637:42634855-42634972	1.0,0.645,0.617	1.0,1.0,1.0	0.246	0.000357014		89480	ENSG00000214367.7	HAUS3	SE	chr4	-	2240037-2241093:2241519-2241790:2242050-2242164	1.0,1.0,1.0	0.923,0.837,0.751	-0.163	0.00204599
16586	ENSG00000152348.15	ATG10	SE	chr5	+	82178489-82178587:82252561-82252659:82276144-82276297	0.491,0.644,0.723	0.809,0.882,0.906	0.246	0.038046		89481	ENSG00000214367.7	HAUS3	SE	chr4	-	2240915-2241093:2241519-2241837:2242050-2242128	1.0,1.0,1.0	0.918,0.832,0.761	-0.163	0.00206878
17343	ENSG00000151657.11	KIN	SE	chr10	-	7780055-7780178:7780263-7780307:7787819-7787981	0.659,1.0,0.607	1.0,1.0,1.0	0.245	0.0391322		25856	ENSG00000143819.12	EPHX1	SE	chr1	+	225810094-225810169:225810411-225810615:225831778-225831959	1.0,0.933,0.851	0.672,0.768,0.851	-0.164	0.00928398
28548	ENSG00000104723.20	TUSC3	SE	chr8	+	15673746-15673836:15743537-15743612:15764202-15764613	0.399,0.666,0.599	1.0,0.399,1.0	0.245	0.00978249		27825	ENSG00000204138.12	PHACTR4	SE	chr1	+	28407409-28407463:28457831-28457855:28459084-28459258	0.717,0.824,0.761	0.667,0.51,0.633	-0.164	0.0213993
11155	ENSG00000085382.11	HACE1	SE	chr6	-	104811310-104811393:104833041-104833173:104843222-104843298	0.68,0.873,0.593	1.0,1.0,0.877	0.244	0.0119689		64361	ENSG00000132589.15	FLOT2	SE	chr17	-	28883107-28883231:28885856-28885947:28897525-28897652	1.0,1.0,1.0	0.587,1.0,0.922	-0.164	0.0210867
57523	ENSG00000141446.10	ESCO1	SE	chr18	-	21529280-21530490:21532472-21532660:21536041-21536185	0.699,0.399,1.0	1.0,1.0,0.829	0.244	0.0221453		19446	ENSG00000121897.14	LIAS	SE	chr4	+	39471235-39471306:39473099-39473211:39477062-39477075	0.974,0.979,1.0	0.904,0.861,0.692	-0.165	1.75521e-05
16880	ENSG00000198780.11	FAM169A	SE	chr5	-	74834425-74834597:74838964-74839050:74840073-74840173	1.0,0.588,0.597	1.0,0.91,1.0	0.242	0.0205774		36992	ENSG00000179403.11	VWA1	SE	chr1	+	1435522-1435821:1437321-1437484:1439080-1440765	1.0,1.0,1.0	0.752,0.851,0.901	-0.165	0.000988615
26413	ENSG00000072756.16	TRNT1	SE	chr3	+	3126979-3127289:3127945-3128018:3129013-3129188	0.573,0.402,0.0	0.0,0.701,1.0	0.242	0.0382554		70602	ENSG00000151090.18	THRB	SE	chr3	-	24228937-24229001:24297225-24297371:24318357-24318494	0.0,1.0,0.835	1.0,0.336,0.0	-0.166	0.0137242
28736	ENSG00000106723.16	SPIN1	SE	chr9	+	88388429-88388538:88448940-88448989:88468371-88468605	0.653,0.751,0.819	1.0,1.0,0.948	0.242	0.00293746		3451	ENSG00000141956.13	PRDM15	SE	chr21	-	41804533-41804614:41810752-41810836:41815704-41815836	0.949,1.0,0.92	0.817,0.615,0.936	-0.167	0.0215822
47799	ENSG00000072422.16	RHOBTB1	SE	chr10	-	60871471-60871651:60872042-60872290:60874953-60875043	0.68,0.709,0.641	0.929,0.918,0.91	0.242	0.0428347		16184	ENSG00000127990.17	SGCE	SE	chr7	-	94585263-94585515:94587777-94588732:94598774-94598963	0.854,1.0,1.0	0.769,0.843,0.739	-0.168	0.0118688
67621	ENSG00000165996.13	HACD1	SE	chr10	-	17594204-17594383:17599289-17599411:17603929-17604047	0.798,0.815,0.551	0.943,1.0,0.948	0.242	0.000526208		81288	ENSG00000141971.12	MVB12A	SE	chr19	+	17413096-17413104:17413220-17413305:17420312-17420411	1.0,1.0,1.0	0.86,1.0,0.637	-0.168	0.0338577
66224	ENSG00000106976.20	DNM1	SE	chr9	+	128239727-128239779:128239984-128239996:128240426-128240485	0.698,0.698,0.881	1.0,1.0,1.0	0.241	0.00330306		83623	ENSG00000233532.6	LINC00460	SE	chr13	+	106381086-106381174:106382090-106382173:106382899-106384315	0.391,0.042,0.2	0.0,0.129,0.0	-0.168	0.0429715
100709	ENSG00000268362.5	AC092279.1	SE	chr19	+	24049404-24049548:24063815-24063941:24065462-24066688	0.404,1.0,0.876	1.0,1.0,1.0	0.24	0.0107715		99308	ENSG00000105355.8	PLIN3	SE	chr19	-	4852015-4852301:4861328-4861411:4867608-4867653	1.0,1.0,1.0	0.779,0.828,0.889	-0.168	0.0127326
31297	ENSG00000105997.22	HOXA3	SE	chr7	-	27122558-27122642:27126885-27127070:27140082-27140219	0.0,0.0,0.0	0.182,0.401,0.129	0.237	0.00435902		101452	ENSG00000180537.12	RNF182	SE	chr6	+	13924866-13925023:13961479-13961562:13974209-13974364	0.155,0.176,0.222	0.0,0.0,0.047	-0.169	0.000837237
75304	ENSG00000103653.16	CSK	SE	chr15	+	74782667-74782720:74790816-74790946:74798211-74798312	0.0,0.0,0.0	0.461,0.211,0.039	0.237	0.00125331		25776	ENSG00000104691.14	UBXN8	SE	chr8	+	30744164-30744277:30751395-30751518:30753034-30753105	1.0,0.969,1.0	0.948,0.509,1.0	-0.171	0.0198802
90293	ENSG00000213918.10	DNASE1	SE	chr16	+	3656637-3656753:3656998-3657111:3657186-3657341	0.695,0.758,0.837	1.0,1.0,1.0	0.237	0.000821851		36447	ENSG00000231064.7	AC234582.1	SE	chr1	+	155195003-155195368:155196850-155197017:155198402-155198618	1.0,1.0,1.0	0.88,0.85,0.757	-0.171	0.00372907
71086	ENSG00000203780.10	FANK1	SE	chr10	+	125988550-125988675:125989429-125989447:125995416-125995498	0.0,0.0,0.0	0.229,0.0,0.472	0.234	0.00732325		57803	ENSG00000012061.15	ERCC1	SE	chr19	-	45416820-45416897:45449172-45449244:45478735-45478828	0.519,0.088,0.31	0.0,0.403,0.0	-0.171	0.0123433
89662	ENSG00000167733.13	HSD11B1L	SE	chr19	+	5684818-5684905:5686899-5686991:5687281-5687304	0.611,0.6,1.0	1.0,1.0,0.906	0.232	0.00192759		91536	ENSG00000154114.12	TBCEL	SE	chr11	+	121054747-121055308:121059968-121060085:121086777-121086849	1.0,0.87,1.0	0.606,1.0,0.746	-0.173	0.00976939
48703	ENSG00000177565.16	TBL1XR1	SE	chr3	-	177053772-177053918:177160870-177160988:177197120-177197225	0.482,1.0,0.826	1.0,1.0,1.0	0.231	0.00763286		95642	ENSG00000108799.12	EZH1	SE	chr17	-	42722794-42722915:42724304-42724424:42727661-42727763	1.0,1.0,1.0	1.0,0.778,0.702	-0.173	0.0159483
11858	ENSG00000272980.4	Z94721.2	SE	chr6	+	167000059-167000113:167003192-167004401:167010812-167010893	0.705,0.658,0.846	1.0,1.0,0.9	0.23	0.000756866		103061	ENSG00000197586.12	ENTPD6	SE	chr20	+	25195700-25195867:25206521-25206590:25207075-25207397	0.671,0.688,0.705	0.488,0.518,0.538	-0.173	9.1682e-09
24506	ENSG00000184497.12	TMEM255B	SE	chr13	+	113769097-113769160:113795147-113795237:113799338-113799419	0.862,0.584,0.789	1.0,1.0,0.926	0.23	0.033956		10286	ENSG00000165416.14	SUGT1	SE	chr13	+	52659178-52659249:52661474-52661570:52662648-52662702	0.559,0.48,0.589	0.417,0.302,0.388	-0.174	0.0065732
66350	ENSG00000171097.13	KYAT1	SE	chr9	-	128846679-128846859:128847432-128847643:128881896-128882075	0.764,0.853,0.582	1.0,0.887,1.0	0.229	0.00109485		54918	ENSG00000198925.11	ATG9A	SE	chr2	-	219225331-219225572:219227921-219228053:219229009-219229342	1.0,1.0,1.0	0.881,0.598,1.0	-0.174	0.0017189
62990	ENSG00000163138.18	PACRGL	SE	chr4	+	20704659-20704814:20707802-20707870:20727284-20727397	0.5,0.685,0.966	0.943,0.945,0.947	0.228	0.0229882		86561	ENSG00000122678.16	POLM	SE	chr7	-	44078350-44078811:44079570-44079741:44080732-44080916	1.0,0.929,1.0	0.705,0.916,0.785	-0.174	9.25926e-05
40126	ENSG00000106692.14	FKTN	SE	chr9	+	105573654-105573746:105574197-105574332:105574944-105575018	0.0,0.0,0.0	0.104,0.344,0.231	0.226	0.0010396		102505	ENSG00000166704.11	ZNF606	SE	chr19	-	57988594-57988721:57999807-57999896:58000682-58000739	1.0,1.0,1.0	0.856,1.0,0.622	-0.174	0.00132645
87814	ENSG00000206195.10	DUXAP8	SE	chr22	+	15784962-15785057:15788551-15788699:15788819-15788931	0.53,0.73,0.847	1.0,1.0,0.786	0.226	0.0173402		59338	ENSG00000175063.16	UBE2C	SE	chr20	+	45814383-45814470:45815389-45815540:45815853-45815913	0.562,0.523,0.56	0.423,0.332,0.364	-0.175	0.00226413
95219	ENSG00000095794.19	CREM	SE	chr10	+	35195908-35196099:35201450-35201486:35206894-35207051	1.0,0.326,0.446	1.0,1.0,0.446	0.225	0.0317039		65294	ENSG00000148123.14	PLPPR1	SE	chr9	+	101185449-101185557:101269879-101270068:101286103-101286160	1.0,1.0,1.0	0.829,1.0,0.647	-0.175	0.0273199
102154	ENSG00000269834.5	ZNF528-AS1	SE	chr19	-	52396315-52396499:52396609-52396752:52397461-52397757	0.078,0.0,0.023	0.399,0.203,0.174	0.225	0.000330102		89284	ENSG00000106636.7	YKT6	SE	chr7	+	44208132-44208198:44211553-44211604:44212246-44212595	0.389,0.485,0.465	0.296,0.31,0.205	-0.176	0.00252442
62310	ENSG00000141127.14	PRPSAP2	SE	chr17	+	18865801-18865952:18867256-18867334:18872582-18872628	0.537,0.669,0.585	0.733,0.829,0.902	0.224	0.000290914		78333	ENSG00000185379.20	RAD51D	SE	chr17	-	35106440-35106481:35118500-35118619:35119110-35119157	0.414,0.537,0.394	0.291,0.254,0.27	-0.177	0.0322828
87615	ENSG00000167004.12	PDIA3	SE	chr15	+	43768488-43768597:43770249-43770329:43771104-43771545	1.0,0.82,0.51	1.0,1.0,1.0	0.223	0.0414931		89479	ENSG00000214367.7	HAUS3	SE	chr4	-	2240846-2241093:2241519-2241781:2242050-2242121	1.0,1.0,1.0	0.913,0.819,0.735	-0.178	0.00136264
89704	ENSG00000103852.12	TTC23	SE	chr15	-	99228532-99228732:99234987-99235080:99245388-99245510	0.17,0.0,0.133	0.17,0.418,0.381	0.222	0.00880445		10016	ENSG00000154889.16	MPPE1	SE	chr18	-	11883689-11884627:11884878-11885043:11886916-11887025	1.0,0.919,1.0	0.816,0.74,0.826	-0.179	0.0305591
38915	ENSG00000094975.13	SUCO	SE	chr1	+	172575517-172575623:172577538-172577559:172577763-172577819	0.395,0.577,0.517	0.741,0.599,0.812	0.221	0.0285391		13838	ENSG00000137274.12	BPHL	SE	chr6	+	3137361-3137493:3138040-3140509:3152487-3153062	1.0,1.0,1.0	0.846,0.715,0.903	-0.179	0.0148562
90085	ENSG00000124749.16	COL21A1	SE	chr6	-	56182530-56182656:56231060-56231134:56247386-56247435	0.0,0.0,0.0	0.069,0.308,0.276	0.218	0.00426323		22685	ENSG00000235109.7	ZSCAN31	SE	chr6	-	28327382-28327533:28329302-28329714:28353861-28353952	0.914,0.905,1.0	0.778,0.595,0.909	-0.179	0.0107251
27501	ENSG00000140416.20	TPM1	SE	chr15	+	63042750-63042943:63043468-63043831:63056984-63057010	0.739,0.85,0.612	1.0,0.85,1.0	0.216	0.00696774		32105	ENSG00000008382.15	MPND	SE	chr19	+	4354323-4354420:4355096-4355173:4357339-4357421	1.0,0.725,1.0	0.725,0.664,0.798	-0.179	0.0426431
704	ENSG00000271147.7	ARMCX5-GPRASP2	SE	chrX	+	102599705-102599859:102600919-102601032:102601463-102601509	0.532,0.837,0.862	1.0,1.0,0.872	0.214	0.0221064		55486	ENSG00000164953.15	TMEM67	SE	chr8	+	93791262-93791319:93791881-93792004:93793197-93793296	0.268,0.0,0.268	0.0,0.0,0.0	-0.179	0.0186618
36899	ENSG00000070501.11	POLB	SE	chr8	+	42344959-42345019:42352518-42352568:42355515-42355567	0.866,0.483,0.847	0.868,0.971,1.0	0.214	0.0213006		61188	ENSG00000242288.9	AC022400.3	SE	chr10	-	73713197-73713332:73718014-73718165:73719159-73719299	1.0,1.0,0.894	0.665,0.691,1.0	-0.179	0.0233117
16316	ENSG00000164932.12	CTHRC1	SE	chr8	+	103375737-103375959:103378026-103378243:103382457-103382614	1.0,0.634,0.726	1.0,1.0,1.0	0.213	0.0277395		13287	ENSG00000117616.17	RSRP1	SE	chr1	-	25243549-25243633:25244453-25244498:25245149-25245301	0.347,0.332,0.128	0.102,0.121,0.045	-0.18	0.0461873
49286	ENSG00000176261.15	ZBTB8OS	SE	chr1	-	32627507-32627544:32634767-32634792:32650401-32650525	0.562,0.673,1.0	1.0,0.873,1.0	0.213	0.0130746		21047	ENSG00000145332.13	KLHL8	SE	chr4	-	87183202-87183389:87185250-87185799:87220417-87220608	1.0,1.0,1.0	1.0,0.852,0.609	-0.18	0.00678393
72638	ENSG00000148950.10	IMMP1L	SE	chr11	-	31456312-31456386:31463171-31463305:31473723-31473786	0.826,1.0,0.537	1.0,1.0,1.0	0.212	0.0443566		75450	ENSG00000149257.14	SERPINH1	SE	chr11	+	75562345-75562378:75563726-75563770:75566315-75566801	0.874,0.698,1.0	0.491,0.786,0.755	-0.18	0.0492434
45394	ENSG00000117069.14	ST6GALNAC5	SE	chr1	+	76868496-76868742:77044203-77044613:77050257-77050316	1.0,0.789,0.579	1.0,1.0,1.0	0.211	0.00736494		1201	ENSG00000102225.15	CDK16	SE	chrX	+	47218412-47218664:47222260-47222380:47223551-47223759	0.517,0.589,0.467	0.369,0.331,0.33	-0.181	0.00313735
8910	ENSG00000106603.18	COA1	SE	chr7	-	43650611-43650712:43665657-43665722:43711399-43711449	0.65,0.893,0.83	1.0,1.0,1.0	0.209	0.00144167		63447	ENSG00000233554.5	B4GALT1-AS1	SE	chr9	+	33177419-33177469:33178895-33178957:33179324-33179983	1.0,0.761,1.0	0.886,0.469,0.864	-0.181	0.0498472
17400	ENSG00000164509.13	IL31RA	SE	chr5	+	55910531-55910672:55913476-55913570:55916643-55916834	0.734,0.551,1.0	1.0,0.912,1.0	0.209	0.00961565		70696	ENSG00000183011.13	NAA38	SE	chr17	-	7858248-7858496:7858631-7858831:7883234-7883335	1.0,1.0,0.842	0.895,0.895,0.509	-0.181	0.0225861
75249	ENSG00000172965.15	MIR4435-2HG	SE	chr2	-	111207775-111208661:111248147-111248241:111344060-111344237	0.421,0.443,0.488	0.682,0.574,0.717	0.207	0.0392086		24735	ENSG00000185596.16	WASH3P	SE	chr15	+	101961603-101961641:101965952-101966223:101972900-101973047	0.761,1.0,1.0	0.554,0.761,0.899	-0.182	0.010462
53848	ENSG00000188690.13	UROS	SE	chr10	-	125812213-125812288:125816176-125816260:125823028-125823039	0.299,0.0,0.0	0.204,0.39,0.324	0.206	0.0226576		47442	ENSG00000163291.14	PAQR3	SE	chr4	-	78930169-78930325:78935120-78935283:78939039-78939225	0.959,0.984,0.988	0.735,0.729,0.92	-0.182	1.17098e-06
65175	ENSG00000196312.13	MFSD14C	SE	chr9	-	96918642-96918826:96933794-96933915:96949554-96949585	0.127,0.224,0.034	0.274,0.356,0.373	0.206	0.0224258		59155	ENSG00000197283.16	SYNGAP1	SE	chr6	+	33438774-33438919:33440552-33440965:33441172-33441374	1.0,1.0,1.0	0.724,1.0,0.73	-0.182	0.000988615
90247	ENSG00000140987.19	ZSCAN32	SE	chr16	-	3390009-3390183:3390422-3390517:3393648-3393814	0.888,0.799,0.696	1.0,1.0,1.0	0.206	0.0105361		12421	ENSG00000138798.11	EGF	SE	chr4	+	109940775-109941145:109943253-109943435:109943841-109943972	1.0,1.0,1.0	0.659,0.793,1.0	-0.183	0.00141945
711	ENSG00000271147.7	ARMCX5-GPRASP2	SE	chrX	+	102605481-102605653:102639399-102639533:102649953-102650145	0.531,1.0,0.853	1.0,1.0,1.0	0.205	0.0023028		29303	ENSG00000103148.15	NPRL3	SE	chr16	-	112621-112775:130521-130591:138149-138334	0.763,0.803,0.811	0.631,0.568,0.629	-0.183	0.000300454
3562	ENSG00000185808.13	PIGP	SE	chr21	-	37059169-37065712:37069551-37069624:37072144-37072310	0.77,0.843,0.686	0.915,1.0,1.0	0.205	0.0213416		39244	ENSG00000127129.9	EDN2	SE	chr1	-	41478774-41479502:41481094-41481193:41482465-41482588	0.94,1.0,1.0	0.759,0.844,0.788	-0.183	0.00594845
21830	ENSG00000145868.16	FBXO38	SE	chr5	+	148425521-148425701:148427212-148427722:148433423-148433524	0.607,0.684,0.666	0.893,0.74,0.94	0.205	0.0391322		59312	ENSG00000240344.8	PPIL3	SE	chr2	-	200882341-200882382:200885261-200885367:200885697-200885772	1.0,1.0,1.0	0.875,0.577,1.0	-0.183	0.0237958
73828	ENSG00000177058.11	SLC38A9	SE	chr5	-	55645788-55645895:55652528-55652723:55656714-55656774	1.0,0.849,0.536	1.0,1.0,1.0	0.205	0.0181994		64520	ENSG00000279457.4	FO538757.1	SE	chr1	-	188438-188584:188790-188902:195262-195411	0.774,1.0,1.0	0.666,0.695,0.863	-0.183	0.00946833
4664	ENSG00000181135.15	ZNF707	SE	chr8	+	143684755-143685067:143688661-143689301:143690056-143690123	0.702,0.751,0.813	0.878,1.0,1.0	0.204	0.0286639		77468	ENSG00000140750.16	ARHGAP17	SE	chr16	-	24919394-24920260:24927683-24927732:24929612-24929660	1.0,0.973,1.0	0.64,0.813,0.969	-0.184	0.000189466
79766	ENSG00000134490.13	TMEM241	SE	chr18	-	23384989-23385067:23421366-23421444:23437780-23437939	0.766,0.496,0.697	1.0,0.568,1.0	0.203	0.0394826		87845	ENSG00000069943.9	PIGB	SE	chr15	+	55341737-55341802:55350698-55350803:55354797-55354978	1.0,0.895,0.948	0.927,0.532,0.833	-0.184	0.0343162
94411	ENSG00000072310.16	SREBF1	SE	chr17	-	17820089-17820521:17823517-17823607:17836726-17836987	0.528,0.488,0.508	0.707,0.708,0.717	0.203	0		10875	ENSG00000111877.17	MCM9	SE	chr6	-	118813441-118816294:118826146-118826292:118826781-118826864	1.0,1.0,1.0	0.735,1.0,0.708	-0.186	0.00978249
55008	ENSG00000189180.15	ZNF33A	SE	chr10	+	38017290-38017386:38054374-38054511:38064087-38065088	1.0,0.51,0.806	1.0,1.0,0.923	0.202	0.0281113		32914	ENSG00000226711.6	FAM66C	SE	chr12	+	8188471-8188645:8193519-8193655:8194202-8194481	0.0,1.0,1.0	0.295,1.0,0.148	-0.186	0.0498049
27503	ENSG00000140416.20	TPM1	SE	chr15	+	63042750-63042943:63043705-63043831:63056984-63057118	0.757,0.862,0.692	1.0,0.914,1.0	0.201	0.00378739		65217	ENSG00000136936.10	XPA	SE	chr9	-	97674908-97675587:97684922-97685040:97693648-97693759	1.0,1.0,1.0	0.826,1.0,0.616	-0.186	0.00223318
97428	ENSG00000182446.13	NPLOC4	SE	chr17	-	81572016-81572088:81606690-81606814:81613317-81613402	1.0,0.489,0.766	1.0,1.0,0.857	0.201	0.0414931		13339	ENSG00000231113.2	AL035587.1	SE	chr6	+	42940772-42940929:42941509-42941615:42943797-42943970	0.0,1.0,1.0	0.369,0.369,0.7	-0.187	0.0460613
9927	ENSG00000064225.12	ST3GAL6	SE	chr3	+	98770878-98770956:98771120-98771190:98772812-98772916	0.0,0.0,0.0	0.089,0.214,0.298	0.2	0.00603591		59440	ENSG00000093167.17	LRRFIP2	SE	chr3	-	37096615-37096660:37105454-37105523:37121491-37121536	0.243,0.093,0.324	0.0,0.097,0.0	-0.188	0.00499773
15578	ENSG00000126522.16	ASL	SE	chr7	+	66075879-66076093:66082367-66082451:66086584-66086662	0.59,0.893,0.754	0.916,0.922,1.0	0.2	0.0153943		371	ENSG00000013619.13	MAMLD1	SE	chrX	+	150363283-150363530:150445453-150445612:150462771-150462846	0.921,0.795,0.93	0.782,0.717,0.58	-0.189	0.0455674
22866	ENSG00000251474.6	RPL32P3	SE	chr3	-	129393606-129393795:129397039-129397140:129399007-129399405	0.817,0.582,1.0	1.0,1.0,1.0	0.2	0.0074363		69757	ENSG00000049541.10	RFC2	SE	chr7	-	74243145-74243246:74249011-74249220:74249738-74249780	0.74,0.775,0.795	0.619,0.581,0.542	-0.189	0.00625528
48903	ENSG00000204839.8	MROH6	SE	chr8	-	143566186-143567465:143567610-143567676:143567785-143567888	0.702,0.754,0.492	0.776,0.847,0.926	0.2	0.0499264		82739	ENSG00000188811.13	NHLRC3	SE	chr13	+	39039563-39039711:39042104-39042305:39044089-39044181	0.847,0.874,0.897	0.675,0.775,0.601	-0.189	0.00604252
47675	ENSG00000120899.17	PTK2B	SE	chr8	+	27322401-27322499:27323266-27323426:27325563-27325681	0.0,0.0,0.0	0.229,0.138,0.224	0.197	0.00041072		102283	ENSG00000066468.22	FGFR2	SE	chr10	-	121551289-121551459:121564501-121564579:121593708-121593967	1.0,1.0,0.868	0.844,0.771,0.684	-0.19	0.0056292
90405	ENSG00000168096.14	ANKS3	SE	chr16	-	4724749-4724831:4726658-4726780:4729979-4730151	0.532,0.466,0.575	0.644,0.755,0.765	0.197	0.021317		5825	ENSG00000197969.12	VPS13A	SE	chr9	+	77282120-77282274:77283354-77283471:77283546-77283650	1.0,1.0,1.0	0.708,0.87,0.849	-0.191	0.0206763
6510	ENSG00000163818.16	LZTFL1	SE	chr3	-	45835589-45835784:45837926-45838047:45841988-45842116	0.42,1.0,0.815	1.0,1.0,0.824	0.196	0.0433154		16633	ENSG00000001167.14	NFYA	SE	chr6	+	41079028-41079164:41080810-41080897:41084045-41084192	0.795,0.712,0.852	0.622,0.614,0.546	-0.192	0.0132521
8005	ENSG00000254827.5	SLC22A18AS	SE	chr11	-	2887779-2888635:2899395-2899790:2902583-2902709	0.57,0.673,1.0	0.831,1.0,1.0	0.196	0.0133103		24118	ENSG00000151917.17	BEND6	SE	chr6	+	56992377-56992555:57014461-57014525:57015132-57015160	0.368,0.104,0.104	0.0,0.0,0.0	-0.192	0.0220065
10026	ENSG00000154889.16	MPPE1	SE	chr18	-	11896982-11897356:11897525-11897620:11902584-11902755	0.821,0.83,0.762	1.0,1.0,1.0	0.196	0.00457689		27928	ENSG00000075303.12	SLC25A40	SE	chr7	-	87836729-87836810:87841632-87841714:87846948-87847122	0.916,1.0,1.0	0.632,0.744,0.964	-0.192	0.00631198
63291	ENSG00000122591.11	FAM126A	SE	chr7	-	22983993-22984045:22985547-22985735:23013924-23014130	0.0,0.025,0.047	0.307,0.1,0.249	0.195	0.00638486		40105	ENSG00000182919.14	C11orf54	SE	chr11	+	93741641-93741728:93747301-93747448:93750345-93750444	1.0,0.858,1.0	0.94,0.621,0.722	-0.192	0.00807538
103448	ENSG00000088367.21	EPB41L1	SE	chr20	+	36112425-36112480:36121659-36121816:36175550-36175715	0.0,0.0,0.0	0.14,0.327,0.117	0.195	0.0131215		72341	ENSG00000187079.16	TEAD1	SE	chr11	+	12674590-12674834:12675408-12675561:12764178-12764434	0.773,0.771,0.747	0.64,0.515,0.561	-0.192	0.000628852
90447	ENSG00000253161.5	LINC01605	SE	chr8	-	37421340-37421569:37473077-37473210:37475841-37476012	0.764,0.679,0.778	1.0,0.907,0.894	0.193	0.000942968		103351	ENSG00000088298.12	EDEM2	SE	chr20	-	35123889-35124034:35131641-35131783:35137879-35138005	1.0,1.0,0.849	0.535,0.738,1.0	-0.192	0.0494081
79573	ENSG00000141447.17	OSBPL1A	SE	chr18	-	24179737-24179835:24181144-24181279:24196124-24196200	0.743,0.743,0.84	1.0,0.902,1.0	0.192	0.0203663		88841	ENSG00000169371.13	SNUPN	SE	chr15	-	75620893-75621056:75622341-75622490:75624714-75625179	0.5,1.0,1.0	0.556,0.529,0.833	-0.194	0.0216083
45334	ENSG00000283761.1	AC118553.2	SE	chr1	+	99993536-99993741:99999260-99999415:100007033-100007156	0.919,0.729,0.637	1.0,0.857,1.0	0.191	0.0210038		68813	ENSG00000126456.15	IRF3	SE	chr19	-	49663342-49663514:49664552-49664673:49665634-49665847	0.925,0.965,0.969	0.664,0.688,0.922	-0.195	0.000554295
31083	ENSG00000133056.13	PIK3C2B	SE	chr1	-	204468869-204469886:204489815-204489931:204494355-204494701	0.0,0.0,0.0	0.086,0.0,0.484	0.19	0.0293973		46371	ENSG00000179818.13	PCBP1-AS1	SE	chr2	-	70051202-70051305:70059642-70059680:70083506-70083627	0.411,0.091,0.406	0.0,0.032,0.285	-0.197	0.0341967
60048	ENSG00000175455.14	CCDC14	SE	chr3	-	123948895-123949132:123955842-123955965:123956045-123956115	0.711,0.733,0.804	0.854,1.0,0.962	0.189	0.00249239		63186	ENSG00000163697.16	APBB2	SE	chr4	-	41013946-41014398:41065575-41065673:41142986-41143142	0.547,1.0,1.0	0.644,0.311,1.0	-0.197	0.0343
21763	ENSG00000150471.16	ADGRL3	SE	chr4	+	61676825-61676935:61730621-61730636:61732753-61733554	0.0,0.476,0.0	0.507,0.176,0.353	0.187	0.00869503		65041	ENSG00000100038.19	TOP3B	SE	chr22	-	21975639-21975807:21975980-21976187:21982729-21982787	0.473,0.473,0.427	0.282,0.245,0.255	-0.197	0.000797983
71006	ENSG00000165660.7	ABRAXAS2	SE	chr10	+	124806830-124806921:124816575-124816612:124826594-124826785	0.658,0.884,0.753	1.0,0.857,1.0	0.187	0.0120211		46750	ENSG00000187583.10	PLEKHN1	SE	chr1	+	973185-973326:973499-973640:973832-974051	1.0,1.0,0.944	0.694,0.799,0.857	-0.198	0.000189466
70179	ENSG00000119929.12	CUTC	SE	chr10	+	99747256-99747390:99750368-99750396:99755624-99756134	0.771,0.541,0.903	1.0,0.771,1.0	0.185	0.0353036		33195	ENSG00000137807.15	KIF23	SE	chr15	+	69423158-69423329:69425281-69425323:69426069-69426182	0.52,0.571,0.479	0.349,0.325,0.298	-0.199	1.51686e-05
94836	ENSG00000196535.16	MYO18A	SE	chr17	-	29115663-29115840:29116443-29116455:29118044-29118189	0.359,0.344,0.24	0.533,0.527,0.439	0.185	0.00204638		44738	ENSG00000137947.11	GTF2B	SE	chr1	-	88863980-88864114:88887275-88887367:88891482-88891589	1.0,0.928,1.0	0.775,0.934,0.622	-0.199	0.000729754
61593	ENSG00000196295.11	GARS-DT	SE	chr7	-	30579005-30579128:30579230-30579314:30584710-30584808	0.793,0.742,0.675	1.0,1.0,0.762	0.184	0.019633		66020	ENSG00000173611.17	SCAI	SE	chr9	-	125055875-125056007:125065989-125066058:125142632-125142677	0.506,0.461,0.395	0.282,0.232,0.249	-0.2	0.0401734
9053	ENSG00000167775.10	CD320	SE	chr19	-	8303854-8303973:8305030-8305805:8308148-8308300	1.0,0.452,1.0	1.0,1.0,1.0	0.183	0.0474621		97393	ENSG00000182446.13	NPLOC4	SE	chr17	-	81560561-81560629:81563920-81563979:81565504-81565607	1.0,1.0,1.0	0.903,1.0,0.496	-0.2	0.00946833
82310	ENSG00000032742.17	IFT88	SE	chr13	+	20656364-20656430:20663262-20663386:20663497-20663604	0.0,0.0,0.0	0.45,0.0,0.098	0.183	0.0317039		25869	ENSG00000145428.14	RNF175	SE	chr4	-	153710124-153710489:153712474-153712576:153715528-153715662	1.0,1.0,1.0	0.735,0.806,0.856	-0.201	0.01369
100975	ENSG00000254004.6	ZNF260	SE	chr19	-	36510694-36515699:36525154-36525373:36528218-36528268	0.725,0.586,0.717	0.669,0.907,1.0	0.183	0.00993078		78877	ENSG00000139644.12	TMBIM6	SE	chr12	+	49738992-49739082:49741201-49741329:49752463-49752526	0.177,0.287,0.291	0.0,0.0,0.152	-0.201	0.00223925
13393	ENSG00000172765.17	TMCC1	SE	chr3	-	129857249-129857405:129860939-129861012:129880308-129880559	0.0,0.0,0.0	0.0,0.058,0.489	0.182	0.0228545		96688	ENSG00000160226.15	CFAP410	SE	chr21	-	44333032-44333262:44336823-44336920:44337648-44337667	0.0,0.232,0.438	0.0,0.067,0.0	-0.201	0.0162981
103108	ENSG00000100997.18	ABHD12	SE	chr20	-	25309445-25309575:25317047-25317078:25339226-25339351	1.0,0.453,0.0	1.0,0.0,1.0	0.182	0.016404		20084	ENSG00000164073.10	MFSD8	SE	chr4	-	127917932-127921771:127921859-127921963:127930682-127930817	1.0,0.925,1.0	0.673,0.746,0.9	-0.202	0.00807538
6990	ENSG00000134982.16	APC	SE	chr5	+	112828855-112828972:112834950-112835165:112837552-112837722	0.854,0.741,0.863	1.0,1.0,1.0	0.181	0.0036058		20807	ENSG00000051620.10	HEBP2	SE	chr6	+	138405970-138406033:138412082-138412256:138412879-138413154	0.187,0.235,0.316	0.021,0.0,0.112	-0.202	0.00347236
8253	ENSG00000204054.13	LINC00963	SE	chr9	+	129488911-129489299:129490843-129491128:129503322-129503430	0.256,0.309,0.139	0.372,0.503,0.373	0.181	0.0484017		24981	ENSG00000154743.17	TSEN2	SE	chr3	+	12505153-12505231:12519058-12519197:12528887-12528924	0.919,1.0,1.0	0.644,0.823,0.845	-0.202	0.00330306
24408	ENSG00000104164.10	BLOC1S6	SE	chr15	+	45587351-45587525:45597879-45597891:45603099-45603187	0.0,0.0,0.085	0.246,0.0,0.382	0.181	0.000733842		84409	ENSG00000186960.10	LINC01551	SE	chr14	+	28773359-28773433:28777857-28777991:28791879-28793234	0.528,0.501,0.517	0.286,0.33,0.32	-0.203	1.32675e-05
70082	ENSG00000269891.2	ARHGAP19-SLIT1	SE	chr10	-	97246271-97246337:97256317-97256404:97259401-97259628	0.737,0.898,0.788	1.0,1.0,0.965	0.181	2.78392e-05		93782	ENSG00000166444.18	ST5	SE	chr11	-	8811246-8811335:8839309-8839350:8871333-8871416	1.0,0.702,1.0	0.523,0.567,1.0	-0.204	0.0212624
71607	ENSG00000119689.14	DLST	SE	chr14	+	74881902-74882016:74885585-74885634:74889274-74889349	1.0,0.53,0.653	1.0,1.0,0.725	0.181	0.0345378		49276	ENSG00000176261.15	ZBTB8OS	SE	chr1	-	32631824-32631879:32633950-32634110:32650432-32650903	0.915,0.847,0.83	0.672,0.802,0.503	-0.205	0.0447254
75456	ENSG00000132952.11	USPL1	SE	chr13	+	30630834-30631474:30637743-30637857:30642627-30642757	1.0,0.613,0.843	1.0,1.0,1.0	0.181	0.0426431		70926	ENSG00000179988.14	PSTK	SE	chr10	+	122980039-122980695:122982732-122983024:122983271-122983470	1.0,0.844,0.928	0.676,0.802,0.679	-0.205	0.0176518
75072	ENSG00000041982.15	TNC	SE	chr9	-	115042218-115042341:115052739-115053015:115057152-115057425	0.593,0.627,0.625	0.752,0.837,0.797	0.18	0.00247234		48661	ENSG00000122435.9	TRMT13	SE	chr1	+	100139648-100139711:100140181-100140251:100140407-100140514	1.0,0.946,1.0	0.731,1.0,0.596	-0.206	0.00511841
53918	ENSG00000131373.14	HACL1	SE	chr3	-	15582876-15582989:15586524-15586602:15589539-15589612	0.568,0.84,0.882	0.964,0.862,1.0	0.179	0.00655953		69913	ENSG00000149582.15	TMEM25	SE	chr11	+	118532916-118533207:118533419-118533551:118533856-118533887	0.859,0.841,0.822	0.666,0.665,0.574	-0.206	0.000451714
57212	ENSG00000165322.17	ARHGAP12	SE	chr10	-	31843460-31843586:31852516-31852597:31861394-31861658	0.734,0.618,0.921	0.808,1.0,1.0	0.178	0.0257057		96369	ENSG00000166260.11	COX11	SE	chr17	-	54951908-54952112:54961118-54961312:54963305-54963431	0.854,1.0,0.943	0.592,0.887,0.701	-0.206	0.0210137
62108	ENSG00000116539.12	ASH1L	SE	chr1	-	155521099-155521618:155562152-155562295:155562778-155562807	0.843,0.793,0.737	1.0,1.0,0.907	0.178	0.0492434		80530	ENSG00000058272.18	PPP1R12A	SE	chr12	-	79805591-79805768:79806165-79806333:79807225-79807330	0.538,0.596,0.534	0.336,0.434,0.277	-0.207	0.0251328
80025	ENSG00000177990.11	DPY19L2	SE	chr12	-	63600305-63600386:63608615-63608675:63617303-63617390	0.681,0.811,0.662	0.877,0.811,1.0	0.178	0.041682		99062	ENSG00000087076.8	HSD17B14	SE	chr19	-	48813108-48813348:48813662-48813730:48815036-48815072	1.0,1.0,0.906	0.842,0.892,0.55	-0.207	0.00565859
18713	ENSG00000205581.10	HMGN1	SE	chr21	-	39345145-39345274:39345829-39347292:39347378-39347483	0.116,0.163,0.14	0.328,0.222,0.4	0.177	0.000263129		3234	ENSG00000160298.17	C21orf58	SE	chr21	-	46318011-46318220:46318784-46318961:46322638-46323869	0.884,0.844,0.863	0.712,0.611,0.643	-0.208	0.00853985
29214	ENSG00000069020.18	MAST4	SE	chr5	+	66828861-66828882:66870777-66870852:66899950-66899982	0.062,0.0,0.0	0.307,0.166,0.117	0.176	0.00946833		21170	ENSG00000231721.7	LINC-PINT	SE	chr7	-	130945609-130945835:130967388-130967517:130984052-130984109	0.349,0.349,0.063	0.133,0.0,0.0	-0.209	0.0466838
35808	ENSG00000107186.16	MPDZ	SE	chr9	-	13121738-13121954:13122086-13122170:13123152-13123271	0.836,0.701,0.793	1.0,1.0,0.852	0.174	0.0389226		33270	ENSG00000008294.20	SPAG9	SE	chr17	-	50974770-50974947:50975862-50975901:50977107-50977221	0.683,0.635,0.665	0.352,0.51,0.495	-0.209	0.00807538
43998	ENSG00000106078.18	COBL	SE	chr7	-	51016211-51017568:51025108-51025231:51026545-51026665	0.749,0.661,0.858	1.0,0.954,0.835	0.174	0.0443276		44033	ENSG00000142794.18	NBPF3	SE	chr1	+	21444947-21445219:21468687-21468897:21470631-21470734	1.0,1.0,1.0	0.643,0.932,0.798	-0.209	0.00215368
76656	ENSG00000214548.16	MEG3	SE	chr14	+	100829651-100831534:100834631-100834751:100835738-100835879	0.122,0.356,1.0	1.0,0.0,1.0	0.174	0.0440267		44587	ENSG00000282057.1	AC092807.3	SE	chr1	-	85496165-85496281:85575831-85575904:85577983-85578250	0.349,0.277,0.0	0.0,0.0,0.0	-0.209	0.0112306
100511	ENSG00000130517.13	PGPEP1	SE	chr19	+	18357505-18357615:18358005-18358070:18369705-18369948	0.0,0.0,0.0	0.303,0.128,0.09	0.174	0.00429249		72343	ENSG00000187079.16	TEAD1	SE	chr11	+	12862249-12862314:12864837-12864900:12881004-12881051	1.0,1.0,1.0	0.525,1.0,0.849	-0.209	0.0148934
49631	ENSG00000117266.15	CDK18	SE	chr1	+	205528047-205528168:205528998-205529096:205529323-205529429	0.617,0.864,1.0	1.0,1.0,1.0	0.173	0.00902786		24945	ENSG00000163947.11	ARHGEF3	SE	chr3	-	56958822-56958889:57035087-57035176:57079225-57079308	1.0,1.0,1.0	0.79,0.579,1.0	-0.21	0.00546613
64350	ENSG00000099330.8	OCEL1	SE	chr19	+	17228253-17228309:17228802-17228915:17229008-17229215	0.227,0.245,0.251	0.402,0.427,0.414	0.173	0.00648324		46364	ENSG00000179818.13	PCBP1-AS1	SE	chr2	-	70053730-70053792:70055713-70055910:70059642-70059680	1.0,1.0,0.795	1.0,0.564,0.601	-0.21	0.00638486
72904	ENSG00000179241.12	LDLRAD3	SE	chr11	+	35944098-35944144:36001085-36001186:36081652-36081778	0.0,0.09,0.0	0.373,0.146,0.09	0.173	0.042524		100310	ENSG00000125864.13	BFSP1	SE	chr20	-	17524847-17524908:17541064-17541199:17558687-17558838	0.139,0.208,0.282	0.0,0.0,0.0	-0.21	0.0128174
5474	ENSG00000104343.19	UBE2W	SE	chr8	-	73810473-73810629:73825146-73825249:73830380-73830472	0.794,0.674,0.693	0.944,0.86,0.873	0.172	0.000938228		29946	ENSG00000123636.17	BAZ2B	SE	chr2	-	159448241-159448409:159453612-159453801:159478574-159478721	1.0,0.882,1.0	0.398,1.0,0.851	-0.211	0.0426974
17306	ENSG00000137210.13	TMEM14B	SE	chr6	+	10751169-10751234:10826563-10826612:10829006-10829203	0.0,0.0,0.0	0.055,0.188,0.273	0.172	0.0485765		88650	ENSG00000179151.12	EDC3	SE	chr15	-	74671567-74671774:74679801-74679925:74695879-74695940	0.195,0.254,0.214	0.031,0.0,0.0	-0.211	0.00109873
59249	ENSG00000173818.16	ENDOV	SE	chr17	+	80417810-80417945:80421827-80421962:80422205-80422242	0.695,0.707,1.0	1.0,0.919,1.0	0.172	0.00693363		31514	ENSG00000220804.8	LINC01881	SE	chr2	+	242122286-242122455:242138783-242138888:242159348-242159498	1.0,1.0,1.0	1.0,0.824,0.54	-0.212	0.026045
46769	ENSG00000114126.17	TFDP2	SE	chr3	-	142005440-142005544:142054114-142054149:142093060-142093127	0.186,0.065,0.1	0.304,0.288,0.269	0.17	0.0279235		51599	ENSG00000152133.14	GPATCH11	SE	chr2	+	37088368-37088440:37089639-37089866:37091915-37092036	0.958,0.826,0.956	0.651,0.7,0.751	-0.213	0.0131877
77372	ENSG00000168872.16	DDX19A	SE	chr16	+	70355484-70355535:70356845-70356906:70361417-70361496	0.486,0.81,0.78	1.0,1.0,0.587	0.17	0.0482921		86562	ENSG00000122678.16	POLM	SE	chr7	-	44078350-44078811:44079860-44079959:44080732-44080916	1.0,0.939,1.0	0.733,0.914,0.654	-0.213	1.09491e-05
86951	ENSG00000114062.19	UBE3A	SE	chr15	-	25405460-25405502:25409087-25409207:25411907-25411932	0.843,0.778,0.801	1.0,0.931,1.0	0.17	0.00132645		71864	ENSG00000005801.17	ZNF195	SE	chr11	-	3357927-3360565:3360719-3360788:3361742-3361889	0.24,0.136,0.406	0.0,0.039,0.102	-0.214	0.00677935
16132	ENSG00000151422.12	FER	SE	chr5	+	108798113-108798389:108832769-108832943:108835707-108835807	0.606,0.887,1.0	1.0,1.0,1.0	0.169	0.0103249		15282	ENSG00000204642.13	HLA-F	SE	chr6	+	29725446-29725563:29726010-29726043:29726882-29727296	0.874,1.0,1.0	0.838,0.565,0.825	-0.215	0.00434806
46681	ENSG00000111450.13	STX2	SE	chr12	-	130790833-130791977:130795994-130796120:130798524-130798635	0.287,0.247,0.277	0.439,0.47,0.41	0.169	0.0410203		38634	ENSG00000163467.11	TSACC	SE	chr1	+	156338506-156338605:156339633-156339791:156344579-156344708	1.0,1.0,1.0	1.0,0.447,0.907	-0.215	0.0426431
32132	ENSG00000081923.13	ATP8B1	SE	chr18	-	57701214-57701313:57704554-57704668:57706489-57706587	0.767,1.0,0.729	1.0,1.0,1.0	0.168	0.00390911		82301	ENSG00000032742.17	IFT88	SE	chr13	+	20567137-20567256:20567884-20567997:20574379-20574475	0.221,0.221,0.202	0.0,0.0,0.0	-0.215	0.0137433
46673	ENSG00000240849.10	TMEM189	SE	chr20	-	50130855-50130947:50151211-50151315:50153516-50153734	0.918,0.586,0.943	1.0,1.0,0.95	0.168	0.0420362		101906	ENSG00000126453.9	BCL2L12	SE	chr19	+	49666684-49666799:49669023-49669115:49673697-49673916	0.861,0.878,1.0	0.513,0.701,0.881	-0.215	0.044294
49270	ENSG00000176261.15	ZBTB8OS	SE	chr1	-	32627507-32627544:32633950-32634110:32650401-32650525	0.717,0.689,1.0	1.0,0.91,1.0	0.168	0.0115947		101909	ENSG00000126453.9	BCL2L12	SE	chr19	+	49666684-49666799:49669023-49669164:49670215-49670488	1.0,1.0,1.0	1.0,0.782,0.574	-0.215	0.00204599
35705	ENSG00000166979.12	EVA1C	SE	chr21	+	32495026-32495170:32501414-32501495:32514813-32514880	1.0,0.605,0.894	1.0,1.0,1.0	0.167	0.00234895		2637	ENSG00000100296.13	THOC5	SE	chr22	-	29549051-29549158:29550727-29550843:29553670-29553741	0.484,0.548,0.613	0.306,0.358,0.331	-0.217	2.00649e-05
41389	ENSG00000131791.7	PRKAB2	SE	chr1	-	147166845-147166939:147167766-147167933:147171988-147172167	0.715,0.565,0.826	0.859,0.865,0.88	0.166	0.0273199		59156	ENSG00000197283.16	SYNGAP1	SE	chr6	+	33438774-33438919:33440728-33440965:33441172-33441374	1.0,1.0,1.0	0.659,1.0,0.691	-0.217	0.000538849
85806	ENSG00000100722.19	ZC3H14	SE	chr14	+	88575839-88575940:88577992-88578140:88601923-88602009	1.0,0.501,1.0	1.0,1.0,1.0	0.166	0.0466838		34379	ENSG00000204120.14	GIGYF2	SE	chr2	+	232731121-232731258:232734416-232734486:232735154-232735238	1.0,0.803,1.0	0.605,1.0,0.544	-0.218	0.0101369
12211	ENSG00000146263.11	MMS22L	SE	chr6	-	97230268-97231652:97233860-97233980:97246627-97246690	0.702,0.85,0.953	1.0,1.0,1.0	0.165	0.000797983		19374	ENSG00000162994.15	CLHC1	SE	chr2	-	55177601-55177781:55180509-55180712:55206269-55206376	1.0,0.846,1.0	0.7,0.823,0.664	-0.22	0.0213655
89703	ENSG00000103852.12	TTC23	SE	chr15	-	99228532-99228732:99234987-99235080:99241364-99241559	0.11,0.0,0.044	0.367,0.202,0.081	0.165	0.0017189		61664	ENSG00000142920.16	AZIN2	SE	chr1	+	33081154-33081508:33082177-33082354:33083953-33084127	0.762,0.918,0.95	0.843,0.529,0.599	-0.22	0.043935
72807	ENSG00000026508.18	CD44	SE	chr11	+	35189834-35190065:35204511-35204640:35208104-35208206	0.372,0.421,0.41	0.544,0.571,0.581	0.164	1.245e-05		69487	ENSG00000011105.13	TSPAN9	SE	chr12	+	3083652-3083719:3206279-3206418:3278420-3278612	0.443,0.514,0.299	0.252,0.125,0.22	-0.22	0.00924938
93122	ENSG00000185324.21	CDK10	SE	chr16	+	89686683-89686797:89687588-89687815:89690552-89690624	0.124,0.171,0.193	0.398,0.338,0.244	0.164	0.0138016		85042	ENSG00000274049.4	INO80B-WBP1	SE	chr2	+	74456102-74456272:74459642-74459745:74460220-74460846	1.0,1.0,1.0	0.703,0.904,0.734	-0.22	0.0104437
67146	ENSG00000069869.16	NEDD4	SE	chr15	-	55869578-55869681:55873957-55874008:55915283-55917108	0.895,1.0,0.615	1.0,1.0,1.0	0.163	0.00650987		86300	ENSG00000080823.22	MOK	SE	chr14	-	102224499-102224794:102225094-102226408:102232534-102232708	1.0,1.0,0.478	1.0,0.314,0.505	-0.22	0.010766
68302	ENSG00000196693.14	ZNF33B	SE	chr10	-	42631807-42632024:42632294-42632439:42636919-42636972	0.487,0.554,0.462	0.657,0.672,0.662	0.163	0.00125331		35424	ENSG00000156976.16	EIF4A2	SE	chr3	+	186787802-186787882:186788309-186788420:186789124-186789291	0.664,0.646,0.651	0.423,0.437,0.437	-0.221	0
103835	ENSG00000145390.11	USP53	SE	chr4	+	119273631-119273708:119291164-119291261:119292337-119294638	0.841,0.887,0.784	1.0,1.0,1.0	0.163	0.00254744		78453	ENSG00000087470.17	DNM1L	SE	chr12	+	32737104-32737161:32738263-32738296:32740063-32740240	0.616,0.686,0.726	0.507,0.434,0.423	-0.221	0.00853985
42750	ENSG00000122483.17	CCDC18	SE	chr1	+	93216635-93216746:93217737-93217869:93221608-93221743	1.0,0.788,0.488	1.0,1.0,0.761	0.162	0.0435102		14065	ENSG00000146067.15	FAM193B	SE	chr5	-	177538910-177539147:177553167-177553350:177554248-177554347	0.626,0.545,0.524	0.392,0.315,0.322	-0.222	0.00263552
47071	ENSG00000138778.11	CENPE	SE	chr4	-	103138350-103138452:103139788-103140079:103140255-103140414	0.05,0.053,0.0	0.078,0.213,0.297	0.162	0.0330619		20693	ENSG00000138777.19	PPA2	SE	chr4	-	105370836-105370873:105424195-105424322:105446382-105446502	1.0,1.0,1.0	0.557,0.866,0.907	-0.223	0.00292389
35703	ENSG00000166979.12	EVA1C	SE	chr21	+	32495026-32495170:32501414-32501486:32514813-32515389	1.0,0.632,0.886	1.0,1.0,1.0	0.161	0.00206219		67462	ENSG00000118961.14	LDAH	SE	chr2	-	20790254-20790398:20801291-20801465:20823036-20823089	1.0,0.906,0.874	0.649,0.609,0.854	-0.223	0.00928244
36945	ENSG00000227036.7	LINC00511	SE	chr17	-	72403321-72404816:72420699-72421066:72422746-72423079	0.625,0.579,0.692	0.802,0.833,0.745	0.161	0.00800196		103477	ENSG00000088367.21	EPB41L1	SE	chr20	+	36214372-36214440:36219760-36219844:36221863-36221934	0.779,1.0,1.0	0.836,0.528,0.742	-0.224	0.0229882
37343	ENSG00000204356.13	NELFE	SE	chr6	-	31956940-31957010:31958307-31958454:31958891-31958968	1.0,0.696,0.779	1.0,0.957,1.0	0.161	0.00119778		81261	ENSG00000204852.15	TCTN1	SE	chr12	+	110640445-110640517:110644966-110645129:110647195-110647336	1.0,1.0,1.0	0.682,0.939,0.705	-0.225	0.00230958
54186	ENSG00000119004.15	CYP20A1	SE	chr2	+	203266513-203266681:203278572-203278688:203280058-203280113	0.925,0.713,0.761	1.0,0.954,0.928	0.161	0.00807538		37537	ENSG00000228794.8	LINC01128	SE	chr1	+	849483-849602:850177-850351:851926-852090	0.381,0.48,0.187	0.316,0.055,0.0	-0.226	0.0418042
56985	ENSG00000144366.15	GULP1	SE	chr2	+	188292838-188293112:188294199-188294393:188383762-188383889	0.0,0.0,0.0	0.194,0.152,0.136	0.161	0.00107385		69066	ENSG00000107731.12	UNC5B	SE	chr10	+	71288567-71288732:71288957-71288990:71290914-71291109	1.0,1.0,1.0	0.945,0.635,0.741	-0.226	0.00162601
22452	ENSG00000117543.20	DPH5	SE	chr1	-	100990062-100990631:100995109-100995149:101013709-101013818	0.751,0.714,0.897	1.0,0.945,0.897	0.16	0.015559		39215	ENSG00000169826.7	CSGALNACT2	SE	chr10	+	43160493-43160595:43167003-43167098:43175950-43176032	0.958,1.0,0.746	0.774,0.524,0.726	-0.227	0.0290838
68904	ENSG00000204130.13	RUFY2	SE	chr10	-	68341106-68341288:68345701-68345911:68346006-68346084	0.521,1.0,1.0	1.0,1.0,1.0	0.16	0.049553		42876	ENSG00000069966.18	GNB5	SE	chr15	-	52115104-52122768:52133377-52133469:52141139-52141211	1.0,1.0,1.0	0.848,0.472,1.0	-0.227	0.00317677
28360	ENSG00000146856.14	AGBL3	SE	chr7	+	134989249-134989310:134993492-134993678:135010041-135012511	0.877,1.0,0.65	1.0,1.0,1.0	0.158	0.0237203		14860	ENSG00000164136.16	IL15	SE	chr4	+	141636946-141637224:141688821-141689035:141719365-141719476	0.86,1.0,1.0	0.847,0.672,0.657	-0.228	0.0330243
31665	ENSG00000224078.13	SNHG14	SE	chr15	+	25083395-25083527:25087466-25087599:25089911-25090010	0.905,0.535,1.0	1.0,1.0,0.915	0.158	0.0404118		16608	ENSG00000255152.8	MSH5-SAPCD1	SE	chr6	+	31747386-31747432:31753300-31753439:31758164-31758293	0.956,1.0,1.0	0.856,0.584,0.831	-0.228	3.6518e-05
56580	ENSG00000131374.14	TBC1D5	SE	chr3	-	17406417-17406526:17428449-17428519:17508473-17508605	0.738,0.708,0.818	0.823,0.93,0.979	0.156	0.043935		80732	ENSG00000028203.17	VEZT	SE	chr12	+	95251939-95252071:95256549-95256622:95257153-95257239	1.0,0.825,1.0	0.602,0.676,0.858	-0.23	0.00307709
53348	ENSG00000222041.11	CYTOR	SE	chr2	+	87470149-87470304:87478121-87478230:87480222-87480423	0.679,1.0,0.634	0.776,1.0,1.0	0.154	0.0184315		99061	ENSG00000087076.8	HSD17B14	SE	chr19	-	48813016-48813348:48813455-48813552:48815036-48815141	1.0,1.0,0.869	0.625,0.901,0.653	-0.23	0.0031855
98480	ENSG00000141627.13	DYM	SE	chr18	-	49333727-49333853:49363160-49363233:49391592-49391645	1.0,0.939,0.602	1.0,1.0,1.0	0.153	0.014587		102268	ENSG00000170906.15	NDUFA3	SE	chr19	+	54105933-54106011:54106352-54106446:54106763-54106961	0.916,0.936,0.877	0.61,0.77,0.658	-0.23	0.000444382
26391	ENSG00000196188.10	CTSE	SE	chr1	-	206013771-206013894:206015930-206016130:206021048-206021167	1.0,1.0,0.545	1.0,1.0,1.0	0.152	0.0345378		16156	ENSG00000145723.16	GIN1	SE	chr5	-	103104540-103104846:103106715-103106909:103108568-103108714	0.827,1.0,1.0	0.585,0.544,1.0	-0.233	0.0263151
101920	ENSG00000169169.14	CPT1C	SE	chr19	+	49691115-49691340:49691820-49691953:49692238-49692393	0.075,0.07,0.143	0.346,0.241,0.156	0.152	0.045463		26721	ENSG00000129158.10	SERGEF	SE	chr11	-	18007940-18008076:18010074-18010139:18012501-18012929	1.0,1.0,0.676	1.0,0.657,0.317	-0.234	0.018779
1770	ENSG00000100429.17	HDAC10	SE	chr22	-	50248830-50248890:50249102-50249198:50249327-50249454	0.838,0.77,0.938	1.0,1.0,1.0	0.151	0.027622		63207	ENSG00000245213.6	AC105285.1	SE	chr4	-	173144235-173145511:173166644-173166790:173167961-173168113	1.0,1.0,0.906	0.371,0.906,0.927	-0.234	0.0264909
46249	ENSG00000112425.14	EPM2A	SE	chr6	-	145625303-145627693:145635244-145635486:145686121-145686219	0.77,0.792,0.876	1.0,0.891,1.0	0.151	0.014108		38284	ENSG00000155761.13	SPAG17	SE	chr1	-	118031691-118031867:118036769-118036883:118039291-118039444	1.0,1.0,1.0	0.665,1.0,0.63	-0.235	0.00711539
86456	ENSG00000256053.7	APOPT1	SE	chr14	+	103562961-103563124:103574106-103574170:103579370-103579491	1.0,1.0,0.547	1.0,1.0,1.0	0.151	0.0221325		16700	ENSG00000031003.10	FAM13B	SE	chr5	-	138018478-138018514:138019880-138019977:138021030-138021197	0.232,0.0,0.476	0.0,0.0,0.0	-0.236	0.0060707
36476	ENSG00000198825.13	INPP5F	SE	chr10	+	119781634-119781771:119791516-119791645:119791868-119792036	0.968,0.767,0.734	1.0,0.918,1.0	0.15	0.0017189		57527	ENSG00000141446.10	ESCO1	SE	chr18	-	21539919-21540009:21540576-21540700:21560858-21560981	0.154,0.476,0.267	0.098,0.09,0.0	-0.236	0.0422613
49092	ENSG00000065559.14	MAP2K4	SE	chr17	+	12020823-12021001:12054888-12054991:12095574-12095694	0.885,0.786,0.878	1.0,1.0,1.0	0.15	0.000813817		57762	ENSG00000119772.16	DNMT3A	SE	chr2	-	25248036-25248252:25249656-25249724:25274940-25275087	0.394,0.384,0.256	0.18,0.072,0.069	-0.238	0.00235155
75302	ENSG00000168014.16	C2CD3	SE	chr11	-	74139604-74139828:74161398-74161556:74168343-74168613	0.693,0.781,0.725	0.871,0.963,0.816	0.15	0.0317215		68398	ENSG00000172671.19	ZFAND4	SE	chr10	-	45651965-45652033:45652983-45653059:45663541-45663842	1.0,1.0,0.856	0.879,0.525,0.738	-0.238	0.0043047
101505	ENSG00000104856.13	RELB	SE	chr19	+	45002948-45002996:45009813-45009822:45011935-45012229	0.91,0.635,0.785	1.0,0.85,0.93	0.15	0.0468978		77413	ENSG00000111247.14	RAD51AP1	SE	chr12	+	4543762-4543911:4545218-4545312:4545781-4545832	0.29,0.109,0.551	0.0,0.235,0.0	-0.238	0.0146959
25495	ENSG00000149657.19	LSM14B	SE	chr20	+	62126303-62126439:62127584-62127701:62130218-62130296	0.73,0.576,0.642	0.793,0.829,0.772	0.149	0.0400793		19373	ENSG00000162994.15	CLHC1	SE	chr2	-	55177601-55177781:55180509-55180712:55181569-55181744	1.0,1.0,1.0	0.629,0.846,0.801	-0.241	0.00878081
75393	ENSG00000159023.21	EPB41	SE	chr1	+	28987430-28987905:28997214-28997319:29011864-29011907	0.763,1.0,0.677	0.887,1.0,1.0	0.149	0.020216		44621	ENSG00000089123.15	TASP1	SE	chr20	-	13600542-13600617:13616856-13617123:13623445-13623514	1.0,1.0,0.264	0.349,0.604,0.589	-0.241	0.0179594
85647	ENSG00000151445.15	VIPAS39	SE	chr14	-	77437807-77437881:77441065-77441173:77442559-77442662	0.879,0.753,0.846	1.0,1.0,0.924	0.149	0.0228545		54611	ENSG00000128973.12	CLN6	SE	chr15	-	68211262-68211318:68211555-68211741:68214289-68214388	1.0,1.0,0.862	0.727,0.411,1.0	-0.241	0.0153625
5959	ENSG00000147454.13	SLC25A37	SE	chr8	+	23541686-23541839:23543087-23543211:23566107-23566378	1.0,1.0,0.557	1.0,1.0,1.0	0.148	0.0287386		61862	ENSG00000248932.5	AC097103.2	SE	chr3	+	139389839-139389933:139419556-139419680:139423015-139423114	1.0,1.0,1.0	0.793,0.75,0.732	-0.242	0.0113652
79763	ENSG00000134490.13	TMEM241	SE	chr18	-	23384989-23385067:23399565-23399647:23430630-23430677	0.824,0.819,0.912	1.0,1.0,1.0	0.148	0.0323675		62451	ENSG00000127419.16	TMEM175	SE	chr4	+	948115-948154:948410-948615:950423-950518	1.0,1.0,1.0	1.0,0.503,0.771	-0.242	0.0319412
3566	ENSG00000185808.13	PIGP	SE	chr21	-	37065373-37065712:37072144-37072310:37072433-37072537	0.784,1.0,0.774	1.0,1.0,1.0	0.147	0.0392872		38635	ENSG00000163467.11	TSACC	SE	chr1	+	156338502-156338605:156339734-156339791:156344579-156344708	1.0,1.0,1.0	1.0,0.458,0.813	-0.243	0.0251328
41408	ENSG00000100852.12	ARHGAP5	SE	chr14	+	32077288-32077435:32090501-32094386:32117142-32117287	0.692,0.853,0.939	0.948,0.974,1.0	0.146	0.000710824		91814	ENSG00000221923.8	ZNF880	SE	chr19	+	52374298-52374427:52379420-52379540:52383848-52383969	1.0,0.937,0.968	0.66,0.769,0.745	-0.244	2.23349e-05
49080	ENSG00000139211.6	AMIGO2	SE	chr12	-	47076497-47079065:47079141-47079248:47079461-47079642	0.494,0.431,0.453	0.581,0.654,0.581	0.146	0.000986979		35599	ENSG00000197363.9	ZNF517	SE	chr8	+	144802869-144802947:144803640-144803767:144804124-144804238	1.0,0.829,0.879	0.734,0.579,0.66	-0.245	0.0132521
64345	ENSG00000099330.8	OCEL1	SE	chr19	+	17226692-17227199:17227839-17228005:17228255-17228309	0.647,0.617,0.62	0.781,0.771,0.77	0.146	0.0132756		45981	ENSG00000205531.12	NAP1L4	SE	chr11	-	2979206-2979237:2989128-2989271:2992228-2992258	0.893,0.806,0.818	0.565,0.556,0.66	-0.245	0.0130616
81698	ENSG00000089157.15	RPLP0	SE	chr12	-	120199117-120199485:120200718-120200831:120201082-120201110	0.791,0.726,0.733	0.899,0.918,0.872	0.146	4.85111e-08		58106	ENSG00000165699.14	TSC1	SE	chr9	-	132931208-132931427:132934465-132934540:132935032-132935095	0.454,0.0,0.399	0.117,0.0,0.0	-0.245	0.0257713
86429	ENSG00000126214.21	KLC1	SE	chr14	+	103679383-103679545:103684985-103685036:103693552-103693953	0.867,0.851,0.844	1.0,1.0,1.0	0.146	0.00330306		70601	ENSG00000151090.18	THRB	SE	chr3	-	24228937-24229001:24297225-24297323:24337299-24337371	0.287,0.0,0.679	0.232,0.0,0.0	-0.245	0.0181162
87679	ENSG00000138606.19	SHF	SE	chr15	-	45172146-45172318:45173575-45173716:45175218-45175269	0.0,0.255,0.0	0.192,0.093,0.407	0.146	0.0132756		46085	ENSG00000135740.16	SLC9A5	SE	chr16	+	67257344-67257434:67257530-67257601:67258317-67258447	1.0,1.0,1.0	1.0,0.859,0.404	-0.246	0.0271566
36941	ENSG00000227036.7	LINC00511	SE	chr17	-	72403321-72404816:72420699-72420964:72422746-72423047	0.658,0.62,0.727	0.829,0.857,0.755	0.145	0.0121413		83016	ENSG00000136169.16	SETDB2	SE	chr13	+	49444373-49444857:49451552-49451909:49460106-49460232	1.0,0.746,1.0	0.227,1.0,0.779	-0.247	0.0440267
35707	ENSG00000166979.12	EVA1C	SE	chr21	+	32495026-32495170:32501414-32501538:32514813-32515389	1.0,0.67,0.897	1.0,1.0,1.0	0.144	0.00204599		37856	ENSG00000157833.12	GAREM2	SE	chr2	+	26184232-26185276:26186188-26186358:26187230-26187315	1.0,1.0,1.0	0.766,0.789,0.7	-0.248	0.0152514
44165	ENSG00000080298.15	RFX3	SE	chr9	-	3395471-3395596:3490278-3490345:3525746-3525983	0.027,0.0,0.0	0.256,0.121,0.079	0.143	0.0126241		85511	ENSG00000119688.20	ABCD4	SE	chr14	-	74295147-74295198:74299547-74299675:74302874-74302910	1.0,0.896,1.0	0.397,1.0,0.756	-0.248	0.0048544
98031	ENSG00000150787.7	PTS	SE	chr11	+	112228593-112228673:112230207-112230230:112230625-112230682	0.569,0.605,0.612	0.729,0.753,0.733	0.143	4.58523e-05		13313	ENSG00000223705.9	NSUN5P1	SE	chr7	+	75412788-75412932:75414639-75414798:75414884-75415024	0.367,0.372,0.535	0.187,0.112,0.227	-0.249	0.0255692
21702	ENSG00000248049.6	UBA6-AS1	SE	chr4	+	67701360-67701484:67720421-67721051:67728539-67728686	0.673,0.65,0.745	0.851,0.766,0.878	0.142	0.0357808		26144	ENSG00000196247.11	ZNF107	SE	chr7	+	64666197-64666285:64679176-64679336:64691247-64691374	0.787,1.0,1.0	0.689,0.723,0.628	-0.249	0.00865635
31076	ENSG00000105072.8	C19orf44	SE	chr19	+	16509498-16509988:16513013-16513109:16514496-16514663	0.798,1.0,0.709	0.933,1.0,1.0	0.142	0.0278884		83451	ENSG00000047346.12	FAM214A	SE	chr15	-	52593416-52593736:52600126-52600235:52601085-52601164	1.0,1.0,1.0	0.556,1.0,0.698	-0.249	0.00525275
10113	ENSG00000198648.10	STK39	SE	chr2	-	168063499-168063570:168065318-168065381:168074981-168075011	0.631,0.648,0.717	0.755,0.804,0.859	0.141	0.00131743		99436	ENSG00000087903.12	RFX2	SE	chr19	-	6016089-6016271:6039979-6040241:6110392-6110446	0.8,1.0,1.0	0.434,0.853,0.765	-0.249	0.0120182
82844	ENSG00000188342.11	GTF2F2	SE	chr13	+	45136732-45136806:45149769-45149788:45207423-45207505	1.0,0.816,0.76	1.0,1.0,1.0	0.141	0.00211485		84103	ENSG00000092036.18	HAUS4	SE	chr14	-	22947600-22947731:22950313-22950410:22952327-22952459	1.0,0.752,1.0	0.515,0.488,1.0	-0.25	0.00946269
85406	ENSG00000133961.20	NUMB	SE	chr14	-	73275209-73277293:73279280-73279424:73282358-73282505	0.115,0.119,0.137	0.282,0.221,0.292	0.141	0.000291739		45344	ENSG00000283761.1	AC118553.2	SE	chr1	+	100017681-100017815:100043072-100043229:100049908-100050004	1.0,1.0,0.805	0.773,0.448,0.83	-0.251	0.0192475
91316	ENSG00000169592.14	INO80E	SE	chr16	+	30000928-30001040:30001464-30001530:30005220-30005577	0.356,0.395,0.358	0.497,0.556,0.479	0.141	0.00131022		18038	ENSG00000108021.20	FAM208B	SE	chr10	+	5712822-5712918:5714134-5714207:5720543-5720668	1.0,1.0,0.729	0.573,0.825,0.573	-0.253	0.0415856
23172	ENSG00000049323.15	LTBP1	SE	chr2	+	33315143-33315269:33342837-33342963:33347366-33347409	0.422,0.395,0.415	0.545,0.542,0.565	0.14	0.00534464		69989	ENSG00000095637.22	SORBS1	SE	chr10	-	95410632-95410777:95414493-95414862:95415468-95416185	1.0,1.0,0.812	1.0,0.623,0.43	-0.253	0.00858363
78378	ENSG00000211455.7	STK38L	SE	chr12	+	27297709-27297854:27300553-27300601:27302136-27302188	0.0,0.033,0.0	0.053,0.093,0.306	0.14	0.00601279		35422	ENSG00000156976.16	EIF4A2	SE	chr3	+	186787802-186787882:186788309-186788416:186789124-186789881	0.647,0.646,0.646	0.365,0.42,0.393	-0.254	0
93278	ENSG00000223959.8	AFG3L1P	SE	chr16	+	89985445-89985570:89988851-89988951:89993767-89993893	0.677,0.545,1.0	0.642,1.0,1.0	0.14	0.0490533		45973	ENSG00000205531.12	NAP1L4	SE	chr11	-	2979206-2979237:2983745-2983813:2988076-2988126	0.579,0.186,0.186	0.0,0.0,0.186	-0.255	0.00924938
5115	ENSG00000244625.5	MIATNB	SE	chr22	+	26672766-26672987:26693680-26693836:26711829-26712008	0.936,0.697,0.78	0.83,1.0,1.0	0.139	0.028581		79975	ENSG00000189144.13	ZNF573	SE	chr19	-	37771563-37771696:37773660-37773751:37779543-37779553	1.0,0.756,1.0	0.848,0.756,0.383	-0.256	0.0287222
55371	ENSG00000135437.9	RDH5	SE	chr12	+	55721147-55721494:55721688-55721947:55723885-55724049	0.932,0.771,0.854	1.0,0.975,1.0	0.139	0.000802573		23235	ENSG00000088543.14	C3orf18	SE	chr3	-	50561721-50561747:50565525-50565700:50567462-50567676	0.479,0.385,0.235	0.143,0.03,0.155	-0.257	0.0123433
52334	ENSG00000136536.14	2023-03-07	SE	chr2	+	159712522-159712661:159714556-159714598:159729008-159729175	0.042,0.057,0.023	0.228,0.22,0.089	0.138	0.00230922		20975	ENSG00000138646.8	HERC5	SE	chr4	+	88479352-88479507:88486114-88486228:88489165-88489336	1.0,1.0,1.0	0.596,1.0,0.63	-0.258	0.00134936
101172	ENSG00000130758.7	MAP3K10	SE	chr19	+	40198396-40198555:40205120-40205296:40209102-40209219	0.799,0.744,0.878	0.963,0.873,1.0	0.138	0.0287222		32469	ENSG00000198625.12	MDM4	SE	chr1	+	204532190-204532246:204537458-204537497:204538208-204538308	0.2,0.592,0.284	0.081,0.067,0.155	-0.258	0.0275004
60511	ENSG00000113971.19	NPHP3	SE	chr3	-	132716756-132716909:132717954-132718117:132718993-132719144	0.0,0.056,0.071	0.175,0.241,0.122	0.137	0.0477821		61033	ENSG00000139323.13	POC1B	SE	chr12	-	89466672-89466922:89467616-89467685:89491935-89492115	1.0,1.0,0.774	0.732,0.578,0.69	-0.258	0.0273138
257	ENSG00000067829.18	IDH3G	SE	chrX	-	153785766-153786449:153787050-153787153:153787822-153787955	0.737,0.96,0.863	1.0,1.0,0.969	0.136	0.00165341		62894	ENSG00000118564.14	FBXL5	SE	chr4	-	15644492-15644708:15656228-15656342:15659726-15659922	0.442,0.43,0.221	0.0,0.159,0.159	-0.258	0.0237489
14932	ENSG00000162910.18	MRPL55	SE	chr1	-	228108246-228108321:228108436-228109021:228109148-228109278	0.761,0.662,0.782	0.869,0.856,0.887	0.136	0.00858298		74316	ENSG00000149743.13	TRPT1	SE	chr11	-	64224542-64224717:64224794-64224970:64225785-64225869	0.875,1.0,1.0	0.478,0.653,0.967	-0.259	0.0216743
80449	ENSG00000170100.13	ZNF778	SE	chr16	+	89223156-89223283:89224718-89224802:89225554-89225631	0.77,1.0,0.823	1.0,1.0,1.0	0.136	0.0112834		55978	ENSG00000126391.13	FRMD8	SE	chr11	+	65387036-65387121:65389384-65389528:65394040-65394099	1.0,0.821,1.0	0.521,0.679,0.84	-0.26	0.0028318
82140	ENSG00000185684.14	EP400P1	SE	chr12	+	132084479-132085316:132104566-132105304:132108571-132108898	0.847,0.657,1.0	1.0,0.912,1.0	0.136	0.0482921		1047	ENSG00000158423.16	RIBC1	SE	chrX	+	53428002-53428084:53430395-53430790:53430906-53431115	1.0,1.0,1.0	1.0,0.781,0.437	-0.261	0.00946833
30058	ENSG00000166169.16	POLL	SE	chr10	-	101580247-101580416:101583507-101583681:101584601-101584720	0.732,0.737,0.877	0.936,0.865,0.949	0.135	0.0393979		22402	ENSG00000114120.12	SLC25A36	SE	chr3	+	140963126-140963227:140966999-140967036:140970926-140970993	0.34,0.329,0.318	0.0,0.079,0.125	-0.261	0.000466059
31497	ENSG00000157741.14	UBN2	SE	chr7	+	139237004-139237097:139251955-139252057:139258487-139258625	1.0,0.597,1.0	1.0,1.0,1.0	0.134	0.0274426		17233	ENSG00000120458.11	MSANTD2	SE	chr11	-	124772993-124773054:124774718-124774974:124799870-124800389	0.789,0.859,0.869	0.479,0.626,0.626	-0.262	0.0141037
52254	ENSG00000162604.12	TM2D1	SE	chr1	-	61709328-61709437:61723712-61723772:61724901-61725144	0.789,0.783,0.793	0.947,0.937,0.883	0.134	0.00691463		96465	ENSG00000068489.12	PRR11	SE	chr17	+	59155731-59155805:59160758-59160876:59163598-59163664	0.271,0.527,0.092	0.0,0.1,0.0	-0.263	0.0213006
62312	ENSG00000141127.14	PRPSAP2	SE	chr17	+	18865801-18865952:18867281-18867334:18872582-18872649	0.744,0.82,0.805	0.887,0.922,0.961	0.134	8.2669e-08		17231	ENSG00000120458.11	MSANTD2	SE	chr11	-	124772993-124773054:124774718-124774818:124799870-124800673	0.772,0.863,0.909	0.553,0.68,0.515	-0.265	0.0134359
95788	ENSG00000116396.14	KCNC4	SE	chr1	+	110211342-110212177:110222963-110223900:110225974-110226178	0.842,0.933,0.822	1.0,1.0,1.0	0.134	0.0087258		79964	ENSG00000189144.13	ZNF573	SE	chr19	-	37755200-37755261:37759046-37759139:37770004-37770097	1.0,1.0,1.0	1.0,0.629,0.575	-0.265	0.000821851
16485	ENSG00000078142.12	PIK3C3	SE	chr18	+	42049530-42049605:42057882-42058051:42064739-42064830	0.891,0.621,1.0	0.91,1.0,1.0	0.133	0.037045		13691	ENSG00000124782.19	RREB1	SE	chr6	+	7228996-7231907:7240437-7240602:7248510-7250012	0.865,1.0,0.913	0.775,0.408,0.792	-0.268	0.0148562
55813	ENSG00000068024.16	HDAC4	SE	chr2	-	239139683-239139796:239144582-239144714:239156651-239156773	0.771,0.75,0.848	0.905,0.885,0.978	0.133	0.0274426		28189	ENSG00000164403.14	SHROOM1	SE	chr5	-	132825162-132826182:132827460-132827607:132830593-132830898	0.722,0.972,0.881	0.675,0.525,0.57	-0.268	0.00145127
49081	ENSG00000139211.6	AMIGO2	SE	chr12	-	47076599-47079065:47079146-47079248:47079461-47079951	0.38,0.318,0.339	0.447,0.532,0.454	0.132	0.00923145		56289	ENSG00000112759.17	SLC29A1	SE	chr6	+	44219635-44219782:44226060-44226167:44227262-44227342	0.665,0.686,0.527	0.397,0.301,0.375	-0.268	0.00635177
21113	ENSG00000138674.16	SEC31A	SE	chr4	-	82828999-82829058:82842184-82842481:82844385-82844509	0.629,0.679,0.553	0.772,0.764,0.719	0.131	0.003782		62331	ENSG00000163964.14	PIGX	SE	chr3	+	196716857-196716921:196717808-196717954:196721176-196721356	1.0,0.336,1.0	0.144,1.0,0.387	-0.268	0.023367
81285	ENSG00000141971.12	MVB12A	SE	chr19	+	17406108-17406296:17413096-17413104:17420312-17420411	0.0,0.127,0.0	0.257,0.13,0.132	0.131	0.033637		96370	ENSG00000166260.11	COX11	SE	chr17	-	54951934-54952112:54961118-54961326:54963305-54963414	0.731,1.0,0.906	0.511,0.821,0.5	-0.268	0.0172359
67426	ENSG00000165629.19	ATP5F1C	SE	chr10	+	7802757-7802854:7806973-7807010:7807658-7807793	0.789,0.85,0.805	0.951,0.922,0.96	0.13	0		40222	ENSG00000164050.12	PLXNB1	SE	chr3	-	48421227-48421384:48422764-48422947:48429252-48429463	1.0,1.0,0.854	0.451,0.729,0.863	-0.27	0.00550895
82343	ENSG00000180776.15	ZDHHC20	SE	chr13	-	21413651-21413772:21421060-21421164:21459053-21459370	0.639,0.928,1.0	0.957,1.0,1.0	0.13	0.0221923		57804	ENSG00000012061.15	ERCC1	SE	chr19	-	45421177-45421393:45449172-45449244:45478735-45478828	0.771,0.088,0.144	0.0,0.183,0.0	-0.273	0.0187586
15758	ENSG00000159885.13	ZNF222	SE	chr19	+	44025353-44025478:44026025-44026086:44027022-44027149	0.086,0.0,0.021	0.221,0.0,0.272	0.129	0.0358818		45414	ENSG00000115020.16	PIKFYVE	SE	chr2	+	208304170-208304318:208304845-208305013:208312235-208312295	1.0,1.0,1.0	1.0,0.753,0.425	-0.274	0.00462121
93462	ENSG00000234684.6	SDCBP2-AS1	SE	chr20	+	1325418-1325529:1359698-1359820:1373077-1373178	0.216,0.052,0.0	0.18,0.171,0.305	0.129	0.0101669		60846	ENSG00000114698.14	PLSCR4	SE	chr3	-	146222064-146222092:146250556-146250637:146250959-146251125	0.564,0.178,0.178	0.097,0.0,0.0	-0.274	0.00710987
12079	ENSG00000137413.15	TAF8	SE	chr6	+	42055951-42056014:42066311-42066459:42068464-42068607	1.0,0.616,1.0	1.0,1.0,1.0	0.128	0.0394946		73594	ENSG00000181666.17	HKR1	SE	chr19	+	37324207-37324265:37324795-37324936:37347189-37347196	0.534,0.615,0.545	0.271,0.311,0.289	-0.274	0.00460909
74918	ENSG00000175322.11	ZNF519	SE	chr18	-	14103862-14106409:14124349-14124476:14132274-14132428	0.856,0.696,0.683	1.0,1.0,0.618	0.128	0.0246411		68817	ENSG00000126456.15	IRF3	SE	chr19	-	49663420-49663514:49664586-49664673:49665634-49665754	0.854,0.928,0.925	0.51,0.525,0.847	-0.275	0.00808128
13362	ENSG00000111802.13	TDP2	SE	chr6	-	24654377-24654530:24657811-24657903:24666525-24666611	0.852,0.979,0.788	1.0,1.0,1.0	0.127	0.000406232		74855	ENSG00000110075.14	PPP6R3	SE	chr11	+	68460737-68460827:68505144-68505271:68515027-68515166	1.0,0.922,1.0	0.618,0.783,0.696	-0.275	0.000944531
32000	ENSG00000169762.16	TAPT1	SE	chr4	-	16191360-16191523:16213767-16213898:16226258-16226541	0.735,0.962,0.926	1.0,1.0,1.0	0.126	0.0362117		35348	ENSG00000144681.10	STAC	SE	chr3	+	36443363-36443640:36486133-36486249:36504392-36504457	1.0,0.928,1.0	0.6,0.781,0.717	-0.277	0.00151428
41354	ENSG00000074966.10	TXK	SE	chr4	-	48071516-48071674:48073934-48074053:48076401-48076466	0.774,0.919,0.882	0.952,1.0,1.0	0.126	0.0106557		48081	ENSG00000114021.11	NIT2	SE	chr3	+	100334769-100334798:100339814-100339954:100341072-100341161	0.34,1.0,1.0	0.508,0.0,1.0	-0.277	0.0330404
53743	ENSG00000134070.4	IRAK2	SE	chr3	+	10177837-10178020:10200368-10200515:10209588-10209692	0.867,0.74,0.801	0.903,0.883,1.0	0.126	0.0435759		68810	ENSG00000126456.15	IRF3	SE	chr19	-	49663187-49663258:49664552-49664673:49665630-49665788	0.569,0.737,0.821	0.401,0.545,0.348	-0.278	0.0194122
70704	ENSG00000107560.11	RAB11FIP2	SE	chr10	-	118015064-118015110:118033981-118034041:118038971-118039440	0.0,0.0,0.038	0.082,0.214,0.121	0.126	0.00204638		95489	ENSG00000163374.19	YY1AP1	SE	chr1	-	155679408-155679512:155688070-155688201:155688929-155689000	1.0,1.0,1.0	0.803,0.626,0.736	-0.278	4.75381e-05
78557	ENSG00000134283.17	PPHLN1	SE	chr12	+	42335882-42335974:42351884-42352049:42355160-42355222	0.251,0.263,0.304	0.365,0.435,0.397	0.126	0.000321818		12938	ENSG00000137312.14	FLOT1	SE	chr6	-	30740678-30740798:30741613-30741704:30742526-30742733	1.0,0.736,0.89	0.623,0.453,0.713	-0.279	0.0432245
14749	ENSG00000157510.13	AFAP1L1	SE	chr5	+	149302417-149302526:149306305-149306404:149307401-149307613	0.919,0.832,0.874	1.0,1.0,1.0	0.125	0.0257057		60905	ENSG00000100697.14	DICER1	SE	chr14	-	95133314-95133503:95140658-95140759:95157390-95157486	1.0,0.807,1.0	0.721,0.704,0.544	-0.279	0.00666995
57806	ENSG00000012061.15	ERCC1	SE	chr19	-	45423269-45423381:45449172-45449244:45478735-45478828	0.079,0.062,0.06	0.134,0.307,0.136	0.125	0.00858363		68091	ENSG00000132005.8	RFX1	SE	chr19	-	13993524-13993895:13998117-13998317:14006102-14006262	0.363,0.461,0.647	0.251,0.323,0.056	-0.28	0.0358818
58778	ENSG00000255717.6	SNHG1	SE	chr11	-	62854079-62854551:62854887-62854938:62855132-62855174	0.397,0.423,0.426	0.524,0.54,0.558	0.125	0.00026372		78454	ENSG00000087470.17	DNM1L	SE	chr12	+	32737864-32737942:32738263-32738296:32740063-32740240	0.838,0.878,0.811	0.621,0.525,0.54	-0.28	0.000165125
76733	ENSG00000143436.10	MRPL9	SE	chr1	-	151760873-151760899:151761961-151762025:151762112-151762155	0.111,0.0,0.013	0.259,0.039,0.2	0.125	0.00934483		22657	ENSG00000163931.15	TKT	SE	chr3	-	53231356-53231550:53237796-53237820:53240250-53240348	1.0,1.0,1.0	1.0,0.633,0.518	-0.283	0.0233117
6775	ENSG00000125826.20	RBCK1	SE	chr20	+	419557-419731:420870-421006:422126-422238	0.476,0.467,0.477	0.609,0.595,0.587	0.124	0.0225624		46533	ENSG00000169241.18	SLC50A1	SE	chr1	+	155135849-155135991:155136827-155136951:155137978-155138098	1.0,1.0,1.0	0.766,0.577,0.807	-0.283	0.000639603
46896	ENSG00000235944.8	ZNF815P	SE	chr7	+	5823159-5823526:5839948-5840075:5840689-5840856	0.887,0.579,0.915	0.812,0.942,1.0	0.124	0.0498049		75931	ENSG00000125726.10	CD70	SE	chr19	-	6590840-6591055:6592415-6592575:6603940-6604103	1.0,1.0,0.743	1.0,0.403,0.491	-0.283	0.00751207
57088	ENSG00000136492.8	BRIP1	SE	chr17	-	61847100-61847220:61849128-61849256:61857057-61857231	0.807,0.747,1.0	1.0,1.0,0.925	0.124	0.0123095		44893	ENSG00000155363.18	MOV10	SE	chr1	+	112674697-112674729:112686965-112687106:112688934-112689138	1.0,1.0,1.0	0.85,0.461,0.837	-0.284	0.0011331
84970	ENSG00000126773.12	PCNX4	SE	chr14	+	60091910-60092419:60114699-60114879:60115718-60115819	0.809,0.731,1.0	1.0,1.0,0.912	0.124	0.0363199		68808	ENSG00000126456.15	IRF3	SE	chr19	-	49663187-49663258:49664442-49664673:49665630-49665705	0.478,0.68,0.765	0.329,0.46,0.282	-0.284	0.0257713
43999	ENSG00000106078.18	COBL	SE	chr7	-	51016211-51017568:51025108-51025372:51026545-51026665	0.8,0.794,0.847	1.0,0.959,0.85	0.123	0.0483809		70945	ENSG00000166839.16	ANKDD1A	SE	chr15	+	64926065-64926170:64926900-64926999:64930821-64930920	1.0,1.0,0.643	0.75,0.286,0.75	-0.286	0.00525266
90699	ENSG00000082438.15	COBLL1	SE	chr2	-	164700521-164700756:164703103-164703220:164704443-164704518	0.0,0.0,0.0	0.186,0.027,0.157	0.123	0.00110233		41830	ENSG00000227671.4	AL390728.4	SE	chr1	-	247200066-247200193:247202015-247202095:247210690-247210856	1.0,1.0,1.0	0.809,0.51,0.82	-0.287	0.000660715
43636	ENSG00000285035.1	AC091057.7	SE	chr15	+	30646113-30646295:30647667-30647714:30658765-30658868	1.0,0.753,0.884	1.0,1.0,1.0	0.121	0.0304894		1051	ENSG00000072501.17	SMC1A	SE	chrX	-	53413231-53413435:53421894-53422040:53422491-53422728	0.518,0.486,0.233	0.178,0.168,0.026	-0.288	0.0065732
49093	ENSG00000065559.14	MAP2K4	SE	chr17	+	12020869-12021001:12081355-12081530:12095574-12095694	0.866,0.896,0.876	1.0,1.0,1.0	0.121	0.000635946		7343	ENSG00000084676.15	NCOA1	SE	chr2	+	24762686-24762776:24768078-24768135:24768223-24768543	1.0,0.879,1.0	0.529,0.879,0.606	-0.288	9.3228e-05
74973	ENSG00000137522.17	RNF121	SE	chr11	+	71960749-71960891:71987003-71987111:71990596-71990663	0.784,0.836,0.738	0.84,0.931,0.95	0.121	0.00849908		47407	ENSG00000185519.8	FAM131C	SE	chr1	-	16059493-16059604:16059868-16060051:16062098-16062192	1.0,1.0,0.843	1.0,0.31,0.669	-0.288	0.0112064
30051	ENSG00000166169.16	POLL	SE	chr10	-	101580247-101580416:101582762-101582891:101584601-101584720	0.786,0.774,0.878	0.936,0.899,0.963	0.12	0.0209263		34498	ENSG00000080947.14	CROCCP3	SE	chr1	-	16490864-16490926:16491009-16491316:16499202-16499257	1.0,1.0,0.395	0.246,1.0,0.282	-0.289	0.00683254
50493	ENSG00000118420.16	UBE3D	SE	chr6	-	83044427-83044659:83054147-83054238:83057825-83057969	0.837,0.882,0.8	0.878,1.0,1.0	0.12	0.012869		54650	ENSG00000075711.20	DLG1	SE	chr3	-	197075836-197075870:197076585-197076685:197081050-197081117	0.855,0.779,0.845	0.499,0.529,0.585	-0.289	5.46346e-10
8788	ENSG00000136280.16	CCM2	SE	chr7	+	45038252-45038426:45064462-45064646:45069825-45069961	0.768,0.779,0.795	0.868,0.884,0.946	0.119	0.00610383		80023	ENSG00000177990.11	DPY19L2	SE	chr12	-	63583811-63583836:63590998-63591127:63594086-63594133	0.573,0.446,1.0	1.0,0.152,0.0	-0.289	0.022785
8806	ENSG00000136280.16	CCM2	SE	chr7	+	45064462-45064646:45069825-45069961:45073459-45073571	1.0,0.773,0.795	1.0,0.926,1.0	0.119	0.0141137		88789	ENSG00000140398.13	NEIL1	SE	chr15	+	75347618-75347999:75348420-75348646:75348883-75349339	0.284,1.0,1.0	1.0,0.284,0.13	-0.29	0.03789
21111	ENSG00000138674.16	SEC31A	SE	chr4	-	82828999-82829058:82842139-82842481:82844385-82844460	0.676,0.708,0.61	0.801,0.795,0.756	0.119	0.00131022		7261	ENSG00000148655.14	LRMDA	SE	chr10	+	76324400-76324485:76535797-76535987:76557208-76557366	0.038,0.268,0.606	0.0,0.035,0.0	-0.292	0.0026362
85613	ENSG00000089916.17	GPATCH2L	SE	chr14	+	76177987-76178042:76180763-76180849:76195877-76195972	0.789,0.81,0.903	1.0,0.96,0.899	0.119	0.00305228		85379	ENSG00000144115.16	THNSL2	SE	chr2	+	88182947-88183073:88185327-88185479:88185897-88186626	1.0,1.0,0.0	0.198,0.798,0.124	-0.293	0.0312187
95850	ENSG00000115204.14	MPV17	SE	chr2	-	27312993-27313074:27322447-27322522:27323051-27323054	0.854,0.865,0.923	1.0,1.0,1.0	0.119	0.000889791		43622	ENSG00000166526.16	ZNF3	SE	chr7	-	100077302-100077433:100079535-100079572:100081634-100081709	0.956,0.872,0.626	0.478,0.645,0.445	-0.295	0.0446965
21192	ENSG00000122299.11	ZC3H7A	SE	chr16	-	11758430-11758539:11761467-11761511:11761909-11762043	0.755,1.0,0.822	1.0,0.931,1.0	0.118	0.0242508		54610	ENSG00000128973.12	CLN6	SE	chr15	-	68211262-68211318:68211555-68211643:68214289-68214388	1.0,1.0,0.759	0.611,0.264,1.0	-0.295	0.010407
60392	ENSG00000114331.13	ACAP2	SE	chr3	-	195308785-195308837:195312946-195312967:195320700-195320813	0.0,0.0,0.093	0.042,0.087,0.317	0.118	0.0259711		99692	ENSG00000171469.10	ZNF561	SE	chr19	-	9614020-9614103:9617620-9617758:9618090-9618179	1.0,1.0,0.903	0.581,1.0,0.438	-0.295	0.0114787
63761	ENSG00000137135.17	ARHGEF39	SE	chr9	-	35662178-35662267:35662945-35663074:35663321-35663392	0.736,0.83,0.918	0.915,0.958,0.965	0.118	0.0220065		93123	ENSG00000185324.21	CDK10	SE	chr16	+	89686971-89687334:89687588-89687815:89689251-89689324	0.888,1.0,1.0	0.79,0.413,0.798	-0.296	0.000554295
30967	ENSG00000172986.12	GXYLT2	SE	chr3	+	72922203-72922335:72957228-72957352:72967546-72967719	0.904,1.0,0.727	1.0,1.0,0.982	0.117	0.00327291		18040	ENSG00000108021.20	FAM208B	SE	chr10	+	5712822-5712918:5717658-5717750:5720543-5720611	1.0,1.0,0.773	0.812,0.684,0.382	-0.298	0.0211434
31999	ENSG00000169762.16	TAPT1	SE	chr4	-	16191360-16191523:16202461-16202580:16226258-16226471	0.804,0.96,0.886	1.0,1.0,1.0	0.117	0.0345378		72831	ENSG00000026508.18	CD44	SE	chr11	+	35204511-35204640:35206114-35206243:35211245-35211253	1.0,1.0,0.938	0.87,0.718,0.455	-0.298	0.000219232
17293	ENSG00000137210.13	TMEM14B	SE	chr6	+	10749621-10749698:10770076-10770204:10826563-10826612	0.871,0.708,1.0	1.0,0.928,1.0	0.116	0.0383994		31652	ENSG00000224078.13	SNHG14	SE	chr15	+	25053827-25053967:25055073-25055230:25059154-25059294	1.0,1.0,0.594	0.448,0.378,0.872	-0.299	0.00981164
46765	ENSG00000114126.17	TFDP2	SE	chr3	-	141994269-141995141:142005440-142005544:142028578-142028597	0.943,0.751,0.959	1.0,1.0,1.0	0.116	0.00225305		7419	ENSG00000144935.14	TRPC1	SE	chr3	+	142736378-142736533:142743484-142743586:142748257-142748460	0.372,0.078,0.543	0.09,0.0,0.0	-0.301	0.0074363
58236	ENSG00000142330.19	CAPN10	SE	chr2	+	240595023-240595304:240595933-240596521:240597887-240598087	0.908,0.827,0.818	0.902,1.0,1.0	0.116	0.0146959		32108	ENSG00000008382.15	MPND	SE	chr19	+	4355096-4355173:4357514-4357585:4359162-4359255	1.0,0.905,1.0	0.815,0.361,0.826	-0.301	0.0028318
60596	ENSG00000118007.12	STAG1	SE	chr3	-	136369107-136369282:136377659-136377752:136398748-136398829	1.0,0.866,0.741	1.0,1.0,0.956	0.116	0.00178694		36679	ENSG00000182796.14	TMEM198B	SE	chr12	+	55831256-55831349:55832958-55833014:55833446-55833541	1.0,1.0,0.744	0.421,0.421,1.0	-0.301	0.00898716
35708	ENSG00000166979.12	EVA1C	SE	chr21	+	32495116-32495170:32503925-32504015:32514813-32514880	1.0,0.709,0.946	1.0,1.0,1.0	0.115	0.0036233		42575	ENSG00000162601.9	MYSM1	SE	chr1	-	58668429-58668566:58668983-58669038:58671869-58671958	1.0,1.0,1.0	0.719,0.378,1.0	-0.301	0.00645105
54095	ENSG00000010810.17	FYN	SE	chr6	-	111699514-111699670:111700103-111700268:111702884-111703034	0.296,0.291,0.227	0.359,0.408,0.393	0.115	0.0135724		101845	ENSG00000104872.10	PIH1D1	SE	chr19	-	49450781-49450848:49451367-49451578:49453269-49453497	1.0,1.0,1.0	0.713,0.383,1.0	-0.301	0.00924938
53917	ENSG00000131373.14	HACL1	SE	chr3	-	15582876-15582989:15585247-15585342:15589539-15589612	0.695,0.918,0.902	0.962,0.895,1.0	0.114	0.0226568		5590	ENSG00000105559.11	PLEKHA4	SE	chr19	-	48854216-48854264:48857421-48857496:48858859-48859139	1.0,0.857,1.0	0.602,0.712,0.634	-0.303	0.000731376
19439	ENSG00000121897.14	LIAS	SE	chr4	+	39463524-39463605:39465284-39465342:39467517-39467646	1.0,0.777,0.822	1.0,1.0,0.938	0.113	0.0207702		16821	ENSG00000260565.6	ERVK13-1	SE	chr16	-	2669410-2669561:2671023-2671231:2671344-2671461	1.0,0.876,1.0	0.697,0.594,0.676	-0.303	0.0369003
35588	ENSG00000128683.13	GAD1	SE	chr2	+	170847675-170847792:170848682-170848794:170849285-170849350	0.0,0.0,0.0	0.0,0.054,0.286	0.113	0.0304569		59158	ENSG00000197283.16	SYNGAP1	SE	chr6	+	33447842-33447933:33448788-33448868:33451759-33452395	0.82,0.394,1.0	0.544,0.222,0.539	-0.303	0.0426431
76970	ENSG00000125485.17	DDX31	SE	chr9	-	132612086-132612255:132618329-132618441:132630263-132630403	0.871,0.815,0.842	0.935,0.983,0.949	0.113	0.00575335		48859	ENSG00000135976.18	ANKRD36	SE	chr2	+	97204067-97204096:97204190-97204263:97209680-97209709	1.0,1.0,1.0	0.439,0.649,1.0	-0.304	0.00128236
98585	ENSG00000049759.17	NEDD4L	SE	chr18	+	58333817-58333892:58342905-58343103:58349536-58349614	0.824,0.945,0.892	1.0,1.0,1.0	0.113	0.000910638		61317	ENSG00000131507.10	NDFIP1	SE	chr5	+	142135729-142135817:142140562-142140629:142151730-142154443	1.0,1.0,1.0	1.0,0.509,0.58	-0.304	0.0217894
86103	ENSG00000138050.14	THUMPD2	SE	chr2	-	39768423-39768501:39769709-39770119:39771504-39771640	1.0,0.709,0.857	0.954,1.0,0.946	0.111	0.017558		79608	ENSG00000062485.18	CS	SE	chr12	-	56286266-56286645:56298608-56298691:56299925-56300023	0.943,0.931,0.705	0.67,0.435,0.562	-0.304	0.0213655
9343	ENSG00000136231.13	IGF2BP3	SE	chr7	-	23342063-23342189:23343717-23343853:23345939-23346062	0.837,0.738,0.806	0.821,0.93,0.96	0.11	0.0073696		111	ENSG00000214827.9	MTCP1	SE	chrX	-	155065618-155065789:155065905-155066057:155070693-155071226	0.664,0.364,0.368	0.114,0.169,0.198	-0.305	0.042524
26412	ENSG00000072756.16	TRNT1	SE	chr3	+	3126964-3126990:3127945-3128018:3129013-3129188	0.046,0.038,0.0	0.0,0.243,0.171	0.11	0.00289495		96076	ENSG00000162591.15	MEGF6	SE	chr1	-	3507794-3507923:3508557-3508689:3509074-3509245	1.0,1.0,1.0	0.598,0.881,0.604	-0.306	9.76477e-05
59879	ENSG00000270011.7	ZNF559-ZNF177	SE	chr19	+	9324694-9324780:9333014-9333113:9337795-9338017	0.0,0.074,0.0	0.167,0.07,0.167	0.11	0.0290863		27299	ENSG00000135951.14	TSGA10	SE	chr2	-	99148263-99148348:99154290-99154427:99154692-99154861	1.0,1.0,0.676	0.294,0.676,0.785	-0.307	0.0437172
72972	ENSG00000149084.12	HSD17B12	SE	chr11	+	43816346-43816391:43830975-43831010:43854714-43854864	0.945,0.888,0.776	1.0,0.94,1.0	0.11	0.000848735		43987	ENSG00000103034.14	NDRG4	SE	chr16	+	58500089-58500269:58500987-58501077:58503705-58503903	0.897,1.0,1.0	0.57,0.692,0.714	-0.307	0.000828265
83723	ENSG00000251503.8	CENPS-CORT	SE	chr1	+	10434656-10434690:10440346-10440413:10451376-10451659	0.904,0.759,0.843	0.99,0.966,0.881	0.11	0.0241402		75189	ENSG00000175581.13	MRPL48	SE	chr11	+	73787894-73787992:73789334-73789490:73844806-73844976	1.0,1.0,0.887	0.518,1.0,0.449	-0.307	0.00807538
84847	ENSG00000126777.17	KTN1	SE	chr14	+	55580253-55580354:55601756-55601880:55616516-55616654	0.946,0.925,0.699	1.0,1.0,0.9	0.11	0.0345568		47465	ENSG00000143398.19	PIP5K1A	SE	chr1	+	151224138-151224279:151224370-151224406:151231670-151231801	1.0,0.866,1.0	0.763,0.617,0.563	-0.308	0.00175852
99327	ENSG00000132635.16	PCED1A	SE	chr20	-	2839191-2839271:2839788-2839933:2840865-2841190	0.802,0.938,0.761	0.947,0.959,0.925	0.11	0.0443241		8956	ENSG00000140876.11	NUDT7	SE	chr16	+	77725430-77725584:77735827-77735986:77736649-77736743	1.0,1.0,0.892	0.465,0.842,0.659	-0.309	0.000929693
100616	ENSG00000101928.12	MOSPD1	SE	chrX	-	134896813-134897034:134899089-134899165:134899279-134899534	0.864,0.814,0.815	0.882,1.0,0.94	0.11	0.0485765		29558	ENSG00000065154.11	OAT	SE	chr10	-	124411972-124412200:124414345-124414432:124414952-124415072	0.654,1.0,1.0	1.0,0.525,0.202	-0.309	0.0246411
6511	ENSG00000163818.16	LZTFL1	SE	chr3	-	45834237-45835784:45837926-45838051:45841988-45842136	0.66,1.0,0.916	1.0,1.0,0.902	0.109	0.0187908		48529	ENSG00000168890.13	TMEM150A	SE	chr2	-	85601020-85601107:85601305-85601482:85601883-85602064	0.886,1.0,1.0	1.0,0.549,0.407	-0.31	0.00263154
6776	ENSG00000125826.20	RBCK1	SE	chr20	+	419557-419731:420870-421031:422126-422238	0.622,0.647,0.685	0.756,0.776,0.749	0.109	0.00738856		74853	ENSG00000110075.14	PPP6R3	SE	chr11	+	68460730-68460827:68505144-68505249:68515027-68515166	1.0,0.876,1.0	0.617,0.732,0.595	-0.311	0.00130721
58605	ENSG00000163681.14	SLMAP	SE	chr3	+	57896872-57896932:57907883-57908006:57909075-57909150	0.955,0.806,0.911	1.0,1.0,1.0	0.109	0.00330306		83465	ENSG00000102595.19	UGGT2	SE	chr13	-	95895179-95895304:95900806-95900938:95902853-95903060	1.0,1.0,1.0	0.553,0.68,0.834	-0.311	0.0195545
65785	ENSG00000148187.17	MRRF	SE	chr9	+	122264903-122264938:122270952-122271075:122280442-122280598	0.884,0.763,0.762	0.875,0.926,0.936	0.109	0.0153986		41388	ENSG00000131791.7	PRKAB2	SE	chr1	-	147162439-147162573:147166845-147166939:147171988-147172167	0.889,1.0,0.734	0.45,0.417,0.821	-0.312	0.0224775
67145	ENSG00000069869.16	NEDD4	SE	chr15	-	55869578-55869681:55872414-55872476:55915283-55915654	0.921,1.0,0.752	1.0,1.0,1.0	0.109	0.0126935		50185	ENSG00000106484.15	MEST	SE	chr7	+	130492471-130492584:130493202-130493263:130495367-130495522	0.827,0.587,0.934	0.48,0.342,0.587	-0.313	0.0425468
91264	ENSG00000171889.3	MIR31HG	SE	chr9	-	21455641-21455944:21476898-21477035:21477168-21477292	0.92,0.847,0.905	1.0,1.0,1.0	0.109	0.0221325		122	ENSG00000269335.5	IKBKG	SE	chrX	+	154558531-154558650:154560406-154560559:154561687-154561763	0.461,0.357,0.787	0.246,0.27,0.148	-0.314	0.0380814
15610	ENSG00000228106.5	AL392172.1	SE	chr1	+	222835118-222835215:222836995-222837066:222837218-222837229	0.747,0.744,0.887	0.935,0.87,0.896	0.108	0.0276263		88724	ENSG00000125743.10	SNRPD2	SE	chr19	-	45688386-45688466:45689232-45689347:45691886-45691941	0.568,0.568,0.55	0.297,0.239,0.208	-0.314	0.0241094
47435	ENSG00000163291.14	PAQR3	SE	chr4	-	78910837-78912063:78917760-78917880:78923856-78923947	0.698,1.0,0.896	1.0,0.917,1.0	0.108	0.0448604		7394	ENSG00000140374.15	ETFA	SE	chr15	-	76284364-76284460:76284804-76284927:76285636-76285738	1.0,1.0,1.0	0.877,0.687,0.489	-0.316	0.00275009
47816	ENSG00000016864.18	GLT8D1	SE	chr3	-	52697859-52697934:52704723-52704948:52705446-52705654	0.864,0.867,0.863	0.919,1.0,1.0	0.108	0.0323024		92797	ENSG00000260643.2	AC092718.3	SE	chr16	-	81053664-81054094:81057904-81058064:81087600-81087664	1.0,0.591,1.0	0.266,1.0,0.376	-0.316	0.0133068
56806	ENSG00000071282.11	LMCD1	SE	chr3	+	8532736-8532825:8537184-8537440:8548567-8548863	0.831,0.835,0.918	0.987,0.961,0.96	0.108	0.000792235		100173	ENSG00000083444.16	PLOD1	SE	chr1	+	11954829-11954893:11957089-11957193:11957841-11957943	1.0,1.0,1.0	1.0,0.541,0.508	-0.317	0.00109873
54496	ENSG00000135913.10	USP37	SE	chr2	-	218529955-218530040:218534608-218534706:218546220-218546298	0.815,0.847,0.917	0.978,0.945,0.976	0.107	0.0221453		100461	ENSG00000138629.15	UBL7	SE	chr15	-	74445976-74446227:74449625-74449675:74456551-74456671	0.0,0.652,0.428	0.059,0.0,0.07	-0.317	0.012514
86320	ENSG00000022976.15	ZNF839	SE	chr14	+	102334553-102334646:102335688-102335838:102338815-102338830	0.975,0.843,0.772	0.979,1.0,0.931	0.107	0.00946269		20671	ENSG00000138780.14	GSTCD	SE	chr4	+	105825671-105825800:105837858-105837889:105842064-105842134	1.0,1.0,0.832	0.315,0.743,0.82	-0.318	0.00594845
82667	ENSG00000133119.12	RFC3	SE	chr13	+	33831255-33831354:33835147-33835217:33966086-33966425	0.872,0.74,1.0	0.979,1.0,0.95	0.106	0.0096805		58508	ENSG00000011638.10	TMEM159	SE	chr16	+	21170436-21170605:21174009-21174148:21179474-21179612	1.0,1.0,0.939	0.756,0.692,0.538	-0.318	0.000691832
85317	ENSG00000117859.18	OSBPL9	SE	chr1	+	51651990-51652041:51669433-51669512:51714002-51714079	0.955,0.92,0.748	1.0,0.965,0.976	0.106	0.00753365		92681	ENSG00000153774.8	CFDP1	SE	chr16	-	75372290-75372568:75391379-75391508:75395089-75395136	0.86,1.0,0.728	0.517,0.728,0.385	-0.319	0.02714
94477	ENSG00000234456.7	MAGI2-AS3	SE	chr7	+	79454828-79455007:79456089-79456180:79458846-79458999	0.0,0.0,0.0	0.171,0.121,0.022	0.105	0.0394107		12124	ENSG00000050820.16	BCAR1	SE	chr16	-	75242469-75243090:75264350-75264601:75267914-75268053	1.0,0.73,0.813	0.548,0.427,0.608	-0.32	0.00809018
67615	ENSG00000148484.17	RSU1	SE	chr10	-	16782033-16782084:16816972-16817084:16817314-16817528	0.775,0.846,0.733	0.902,0.906,0.858	0.104	0.00163322		80462	ENSG00000180881.19	CAPS2	SE	chr12	-	75359883-75361019:75371078-75371482:75390837-75390908	0.796,1.0,1.0	0.837,0.748,0.252	-0.32	0.0134063
97985	ENSG00000168675.18	LDLRAD4	SE	chr18	+	13438243-13438384:13484036-13484119:13621116-13621270	0.0,0.0,0.0	0.118,0.138,0.055	0.104	0.00305228		45126	ENSG00000116039.12	ATP6V1B1	SE	chr2	+	70962776-70962900:70963161-70963261:70963571-70963654	1.0,1.0,0.749	0.705,0.374,0.705	-0.322	0.0156419
6360	ENSG00000065534.18	MYLK	SE	chr3	-	123640286-123640504:123647223-123647427:123648970-123649064	0.826,0.878,0.704	0.926,0.925,0.867	0.103	0.0330847		82421	ENSG00000234323.6	LINC01505	SE	chr9	+	106279100-106279190:106500356-106500505:106558471-106558583	0.667,0.8,1.0	0.538,0.294,0.667	-0.323	0.0145365
45936	ENSG00000144810.15	COL8A1	SE	chr3	+	99685432-99685539:99691398-99691568:99744896-99745021	0.859,1.0,0.666	1.0,0.831,1.0	0.102	0.0433904		36681	ENSG00000182796.14	TMEM198B	SE	chr12	+	55831256-55831349:55832958-55833038:55833446-55833541	1.0,1.0,0.839	0.565,0.303,1.0	-0.324	0.00971216
58121	ENSG00000004534.14	RBM6	SE	chr3	+	49962575-49962685:49967197-49968748:49972058-49972148	0.805,0.844,0.778	0.918,0.872,0.942	0.102	0.025057		94016	ENSG00000133466.13	C1QTNF6	SE	chr22	-	37191671-37191737:37195380-37195512:37197602-37197841	1.0,1.0,1.0	0.761,0.65,0.614	-0.325	0.00836765
71669	ENSG00000105983.20	LMBR1	SE	chr7	-	156677790-156684163:156688029-156688191:156724111-156724178	0.82,0.803,0.806	0.949,0.847,0.938	0.102	0.021255		79534	ENSG00000092841.18	MYL6	SE	chr12	+	56158683-56158711:56159586-56159622:56160024-56160148	1.0,0.742,1.0	0.633,0.399,0.731	-0.326	0.000122886
14240	ENSG00000100288.19	CHKB	SE	chr22	-	50579726-50579802:50580056-50580082:50580189-50580271	0.749,1.0,0.907	1.0,0.96,1.0	0.101	0.0454921		26428	ENSG00000267419.2	AC011477.1	SE	chr19	+	19776635-19776994:19786608-19786691:19806280-19806376	1.0,1.0,1.0	0.36,1.0,0.658	-0.327	0.00274597
32909	ENSG00000031081.10	ARHGAP31	SE	chr3	+	119365315-119365418:119368371-119368516:119380903-119380986	0.948,0.87,0.755	0.951,0.925,1.0	0.101	0.015151		37539	ENSG00000228794.8	LINC01128	SE	chr1	+	849483-849602:850180-850351:851926-852014	0.318,0.482,0.189	0.0,0.0,0.0	-0.33	0.00954031
35415	ENSG00000156976.16	EIF4A2	SE	chr3	+	186784563-186784696:186784961-186785101:186785882-186785913	0.636,0.592,0.65	0.71,0.731,0.741	0.101	0.00167421		102079	ENSG00000141665.12	FBXO15	SE	chr18	-	74125974-74126101:74129404-74129614:74130415-74130658	0.555,1.0,1.0	0.713,0.555,0.293	-0.331	0.022146
77540	ENSG00000064313.11	TAF2	SE	chr8	-	119762414-119762608:119778018-119778129:119781052-119781193	0.866,0.96,0.793	1.0,0.923,1.0	0.101	0.0189457		80617	ENSG00000198707.14	CEP290	SE	chr12	-	88053651-88053746:88054339-88054413:88055575-88055717	1.0,1.0,1.0	0.903,0.572,0.527	-0.333	0.000277559
48688	ENSG00000177565.16	TBL1XR1	SE	chr3	-	177053772-177053918:177098465-177098541:177197120-177197192	0.774,1.0,0.925	1.0,1.0,1.0	0.1	0.0422362		91190	ENSG00000176953.12	NFATC2IP	SE	chr16	+	28954564-28954682:28958716-28958861:28963704-28965698	0.0,1.0,1.0	0.0,0.0,1.0	-0.333	0.00482352
81697	ENSG00000089157.15	RPLP0	SE	chr12	-	120199309-120199485:120200045-120200150:120201082-120201108	0.057,0.0,0.03	0.025,0.268,0.095	0.1	0.043844		48	ENSG00000183878.15	UTY	SE	chrY	-	13335562-13336335:13354785-13354833:13355002-13355398	0.274,0.0,0.735	0.0,0.0,0.0	-0.336	0.0064778
85772	ENSG00000127914.16	AKAP9	SE	chr7	+	91940866-91941147:91973710-91973968:91980288-91980333	0.749,0.908,1.0	1.0,1.0,0.956	0.1	0.0441171		48185	ENSG00000115325.13	DOK1	SE	chr2	+	74549070-74549172:74554793-74554859:74555153-74555387	1.0,1.0,1.0	0.536,0.675,0.776	-0.338	0.000387207
91310	ENSG00000169592.14	INO80E	SE	chr16	+	30000928-30001040:30001211-30001530:30005220-30005323	0.43,0.45,0.444	0.536,0.565,0.523	0.1	0.0273199		34726	ENSG00000171735.18	CAMTA1	SE	chr1	+	6785517-6785575:6806982-6807088:6871756-6872019	0.523,0.517,0.577	0.089,0.163,0.349	-0.339	0.0213297
2775	ENSG00000172771.11	EFCAB12	RI	chr3	-	129411157-129411354:129411354-129415244:129415244-129415401	1.0,1.0,1.0	1.0,0.018,0.156	0.609	9.24918e-07		4823	ENSG00000131773.13	KHDRBS3	SE	chr8	+	135521236-135521355:135557447-135557587:135606954-135607027	1.0,0.508,1.0	0.34,0.147,1.0	-0.34	0.0242679
2297	ENSG00000087303.17	NID2	RI	chr14	-	52005736-52005849:52005849-52006536:52006536-52006660	0.348,1.0,1.0	0.211,0.097,0.263	0.592	0.000257254		99478	ENSG00000125648.14	SLC25A23	SE	chr19	-	6436080-6436464:6438446-6438534:6438723-6438821	1.0,1.0,1.0	0.595,0.386,1.0	-0.34	0.00108866
5276	ENSG00000206149.10	HERC2P9	RI	chr15	+	28655272-28655420:28655420-28655494:28655494-28655691	1.0,1.0,1.0	0.667,0.572,0.0	0.587	4.99407e-05		101448	ENSG00000178386.12	ZNF223	SE	chr19	+	44060748-44060841:44063264-44063566:44066063-44066219	0.623,0.224,0.426	0.042,0.191,0.02	-0.34	0.00243525
1917	ENSG00000159588.14	CCDC17	RI	chr1	-	45622954-45623117:45623117-45623556:45623556-45623652	1.0,1.0,1.0	0.275,0.432,0.622	0.557	0.00266742		38424	ENSG00000128284.19	APOL3	SE	chr22	-	36145472-36145599:36149045-36149371:36160668-36160755	1.0,1.0,1.0	0.455,0.523,1.0	-0.341	0.0426974
5467	ENSG00000103355.13	PRSS33	RI	chr16	-	2783952-2784802:2784802-2785001:2785001-2785171	1.0,0.794,1.0	0.562,0.391,0.363	0.493	0.000562594		49271	ENSG00000176261.15	ZBTB8OS	SE	chr1	-	32627507-32627544:32633950-32634110:32650428-32650550	1.0,0.828,0.853	0.707,0.61,0.342	-0.341	0.0206402
5603	ENSG00000132604.10	TERF2	RI	chr16	-	69368375-69368482:69368482-69368586:69368586-69368595	0.841,0.764,0.836	0.522,0.164,0.306	0.483	0.000258362		16502	ENSG00000127184.12	COX7C	SE	chr5	+	86619352-86619442:86619738-86619878:86620667-86620766	0.462,0.474,0.093	0.0,0.0,0.0	-0.343	0.000126396
4948	ENSG00000130653.15	PNPLA7	RI	chr9	-	137464125-137464195:137464195-137464339:137464339-137464456	1.0,1.0,0.504	0.203,0.0,1.0	0.434	5.59335e-05		32409	ENSG00000115977.18	AAK1	SE	chr2	-	69476879-69476990:69495984-69496080:69505568-69505673	1.0,1.0,0.77	0.68,0.415,0.646	-0.343	0.0127027
5444	ENSG00000162004.16	CCDC78	RI	chr16	-	722921-723161:723161-723856:723856-723936	0.514,1.0,1.0	0.6,0.402,0.227	0.428	0.0118933		73248	ENSG00000197889.9	MEIG1	SE	chr10	+	14966439-14966606:14970247-14970546:14972512-14972681	1.0,1.0,0.499	0.47,1.0,0.0	-0.343	0.0268755
4223	ENSG00000179532.12	DNHD1	RI	chr11	+	6547862-6548040:6548040-6548209:6548209-6548402	0.701,1.0,0.789	0.413,0.319,0.64	0.373	0.0080699		81265	ENSG00000204852.15	TCTN1	SE	chr12	+	110640382-110640517:110644966-110645143:110647195-110647336	1.0,1.0,1.0	0.533,0.932,0.507	-0.343	0.000651924
4243	ENSG00000243970.3	PPIEL	RI	chr1	-	39547578-39547634:39547634-39548861:39548861-39548951	1.0,1.0,0.494	1.0,0.413,0.035	0.349	0.0022184		31200	ENSG00000160117.14	ANKLE1	SE	chr19	+	17283224-17283884:17284088-17284266:17285430-17285590	0.695,1.0,1.0	0.732,0.615,0.313	-0.345	0.0199862
5651	ENSG00000197912.15	SPG7	RI	chr16	+	89545871-89546030:89546030-89546657:89546657-89546760	1.0,1.0,0.729	0.434,0.277,1.0	0.339	0.00729312		70614	ENSG00000166261.10	ZNF202	SE	chr11	-	123730751-123730985:123740116-123740189:123740416-123740536	0.934,0.729,0.701	0.573,0.234,0.518	-0.346	0.0485143
3552	ENSG00000114626.17	ABTB1	RI	chr3	+	127676535-127676581:127676581-127677167:127677167-127677286	1.0,0.169,1.0	1.0,0.0,0.169	0.333	0.000399797		9180	ENSG00000227014.6	AC007285.1	SE	chr7	+	29988599-29988793:29988889-29989224:30008227-30008377	1.0,0.772,1.0	1.0,0.278,0.451	-0.348	0.00571929
1114	ENSG00000282458.1	WASH5P	RI	chr19	-	65821-66047:66047-66345:66345-66499	0.526,0.0,0.55	0.045,0.057,0.018	0.319	0.00165887		16530	ENSG00000218739.9	CEBPZOS	SE	chr2	+	37197253-37197350:37198493-37198672:37199703-37199819	0.803,1.0,1.0	0.645,0.476,0.635	-0.349	0.000280101
3424	ENSG00000088340.15	FER1L4	RI	chr20	-	35559340-35559627:35559627-35560539:35560539-35560638	0.558,1.0,1.0	0.27,0.33,1.0	0.319	0.00499349		42348	ENSG00000054282.15	SDCCAG8	SE	chr1	+	243293090-243293219:243293398-243293494:243304712-243304777	0.378,0.422,0.477	0.048,0.126,0.052	-0.35	8.36866e-05
4947	ENSG00000130653.15	PNPLA7	RI	chr9	-	137460633-137460737:137460737-137461535:137461535-137461620	1.0,0.239,1.0	0.191,0.095,1.0	0.318	0.0110694		36152	ENSG00000143850.14	PLEKHA6	SE	chr1	-	204218850-204222779:204223461-204223585:204228082-204228228	1.0,1.0,1.0	0.522,0.421,1.0	-0.352	0.000109602
1850	ENSG00000020577.13	SAMD4A	RI	chr14	+	54784339-54784381:54784381-54784536:54784536-54784620	1.0,0.774,1.0	0.797,0.35,0.71	0.306	0.002345		17310	ENSG00000137210.13	TMEM14B	SE	chr6	+	10747758-10747881:10827696-10827824:10829006-10829186	1.0,1.0,1.0	0.082,1.0,0.855	-0.354	0.0305569
5367	ENSG00000140398.13	NEIL1	RI	chr15	+	75354249-75354277:75354277-75354430:75354430-75354492	1.0,0.856,1.0	0.812,0.657,0.478	0.303	9.94693e-05		44290	ENSG00000041880.14	PARP3	SE	chr3	+	51942344-51942708:51942929-51943046:51943348-51943538	1.0,0.737,1.0	0.627,0.797,0.252	-0.354	0.00456867
3776	ENSG00000213930.11	GALT	RI	chr9	+	34647088-34647258:34647258-34648114:34648114-34648171	1.0,1.0,1.0	1.0,0.532,0.64	0.276	0.00537213		55943	ENSG00000178809.11	TRIM73	SE	chr7	+	75395062-75395503:75399107-75399332:75403644-75403740	1.0,1.0,0.285	0.443,0.166,0.614	-0.354	0.0145036
3944	ENSG00000177943.13	MAMDC4	RI	chr9	+	136859208-136859317:136859317-136859885:136859885-136860064	1.0,0.798,0.737	0.702,0.284,0.722	0.276	0.0384117		28291	ENSG00000165171.10	METTL27	SE	chr7	-	73834914-73835080:73841069-73841198:73842489-73842516	1.0,1.0,0.763	1.0,0.349,0.349	-0.355	0.0422099
2795	ENSG00000171401.14	KRT13	RI	chr17	-	41505055-41505235:41505235-41505446:41505446-41505597	1.0,1.0,1.0	0.57,0.869,0.743	0.273	0.00129843		26061	ENSG00000135541.20	AHI1	SE	chr6	-	135492227-135492291:135495813-135495898:135497187-135497249	0.761,0.793,1.0	0.389,0.844,0.241	-0.36	0.0286001
2683	ENSG00000177000.12	MTHFR	RI	chr1	-	11802880-11803129:11803129-11803404:11803404-11803526	1.0,1.0,0.794	1.0,0.584,0.413	0.266	0.0022184		36704	ENSG00000144504.15	ANKMY1	SE	chr2	-	240480936-240481097:240482182-240482261:240499957-240500123	0.662,0.766,0.723	0.272,0.362,0.433	-0.361	0.0211314
5446	ENSG00000162004.16	CCDC78	RI	chr16	-	724910-724989:724989-725077:725077-725145	1.0,0.611,1.0	0.44,0.456,1.0	0.238	0.0367457		70615	ENSG00000166261.10	ZNF202	SE	chr11	-	123730486-123730985:123740116-123740192:123740416-123740536	0.941,0.79,0.699	0.602,0.231,0.514	-0.361	0.0317215
4476	ENSG00000168763.15	CNNM3	RI	chr2	+	96827730-96827900:96827900-96828995:96828995-96829134	0.917,0.857,0.791	0.59,0.622,0.642	0.237	0.0167795		47376	ENSG00000138316.10	ADAMTS14	SE	chr10	+	70672802-70672884:70674555-70674995:70702311-70702468	1.0,1.0,0.842	0.835,0.317,0.603	-0.362	0.00144167
6297	ENSG00000069399.14	BCL3	RI	chr19	+	44758245-44758473:44758473-44758723:44758723-44758841	1.0,0.673,1.0	0.599,0.849,0.528	0.232	0.0118912		73033	ENSG00000198830.10	HMGN2	SE	chr1	+	26472449-26472627:26473459-26473527:26474084-26474128	1.0,1.0,0.774	0.282,1.0,0.407	-0.362	0.0196909
4216	ENSG00000166313.18	APBB1	RI	chr11	-	6401573-6401688:6401688-6401976:6401976-6401982	0.705,1.0,1.0	0.712,0.592,0.725	0.225	0.00306894		10219	ENSG00000137868.18	STRA6	SE	chr15	-	74196007-74196147:74197751-74197862:74202154-74202282	1.0,1.0,0.775	0.462,0.223,1.0	-0.363	0.00286912
2861	ENSG00000242086.8	MUC20-OT1	RI	chr3	+	195708153-195708513:195708513-195708746:195708746-195708841	1.0,1.0,1.0	1.0,0.854,0.484	0.221	0.0356865		26467	ENSG00000054116.11	TRAPPC3	SE	chr1	-	36136569-36137322:36139719-36139819:36149091-36149497	0.545,0.545,0.374	0.374,0.0,0.0	-0.363	0.0135134
5050	ENSG00000100888.13	CHD8	RI	chr14	-	21428963-21429335:21429335-21431810:21431810-21431858	0.706,0.805,0.708	0.555,0.467,0.542	0.218	0.00183712		41511	ENSG00000267123.6	LINC02081	SE	chr17	-	78624191-78624315:78627917-78628035:78630031-78630280	0.661,0.202,0.418	0.0,0.157,0.034	-0.363	0.00913669
3090	ENSG00000187796.14	CARD9	RI	chr9	-	136364482-136365217:136365217-136366799:136366799-136366845	1.0,0.664,1.0	0.601,0.647,0.779	0.212	0.0281381		46935	ENSG00000241962.9	AC079447.1	SE	chr2	+	99195572-99195756:99206633-99206757:99215997-99216114	1.0,1.0,1.0	1.0,0.29,0.621	-0.363	0.0123038
1219	ENSG00000240303.7	ACAD11	RI	chr3	-	132578795-132579056:132579056-132579491:132579491-132579558	0.641,1.0,1.0	0.641,1.0,0.373	0.209	0.0368522		43415	ENSG00000075651.15	PLD1	SE	chr3	-	171677565-171677694:171686684-171686798:171687370-171687584	1.0,0.872,0.694	0.459,0.63,0.386	-0.364	0.00347784
1438	ENSG00000145020.15	AMT	RI	chr3	-	49419709-49419788:49419788-49420210:49420210-49420342	0.439,1.0,1.0	0.758,0.701,0.383	0.199	0.00499349		20085	ENSG00000164073.10	MFSD8	SE	chr4	-	127921523-127921771:127921859-127921982:127930682-127930817	1.0,0.839,1.0	0.291,0.64,0.814	-0.365	0.0121413
4822	ENSG00000135452.9	TSPAN31	RI	chr12	+	57746175-57746256:57746256-57746588:57746588-57746720	0.362,0.432,0.448	0.218,0.332,0.134	0.186	0.00578999		1098	ENSG00000102003.10	SYP	SE	chrX	-	49194190-49194361:49197538-49197839:49198967-49199033	1.0,1.0,1.0	0.699,0.199,1.0	-0.367	0.0497288
1145	ENSG00000161010.14	MRNIP	RI	chr5	-	179837275-179837885:179837885-179840871:179840871-179840959	0.541,0.568,0.53	0.345,0.397,0.358	0.18	5.59335e-05		5858	ENSG00000142303.13	ADAMTS10	SE	chr19	-	8605011-8605358:8605622-8605809:8608133-8608248	1.0,1.0,1.0	0.526,1.0,0.372	-0.367	0.0363199
4943	ENSG00000032742.17	IFT88	RI	chr13	+	20601704-20601748:20601748-20601850:20601850-20601933	0.856,1.0,1.0	0.856,0.826,0.64	0.178	0.0148316		36682	ENSG00000182796.14	TMEM198B	SE	chr12	+	55831256-55831349:55832958-55833125:55833446-55833521	1.0,1.0,0.739	0.398,0.239,1.0	-0.367	0.00527047
4412	ENSG00000142186.16	SCYL1	RI	chr11	+	65538269-65538324:65538324-65538446:65538446-65538704	0.832,0.861,0.887	0.799,0.615,0.712	0.151	0.0202357		17297	ENSG00000137210.13	TMEM14B	SE	chr6	+	10751132-10751234:10770076-10770204:10826563-10826612	1.0,1.0,1.0	0.811,0.402,0.683	-0.368	0.001168
2966	ENSG00000204839.8	MROH6	RI	chr8	-	143567610-143567676:143567676-143567785:143567785-143567888	0.3,0.382,0.366	0.214,0.174,0.228	0.144	0.0339262		27613	ENSG00000225470.7	JPX	SE	chrX	+	73994839-73994961:73998767-73998844:74004269-74004351	0.702,1.0,0.628	0.594,0.248,0.384	-0.368	0.0385629
1503	ENSG00000143702.15	CEP170	RI	chr1	-	243185778-243186072:243186072-243186258:243186258-243186422	0.146,0.147,0.27	0.053,0.0,0.086	0.141	0.0025382		81903	ENSG00000180902.17	D2HGDH	SE	chr2	+	241750150-241750294:241754630-241754746:241755044-241756014	1.0,1.0,0.36	0.252,1.0,0.0	-0.369	0.0193897
4139	ENSG00000075826.16	SEC31B	RI	chr10	-	100505360-100505495:100505495-100506039:100506039-100506201	1.0,0.838,1.0	0.811,0.606,1.0	0.14	0.00706552		15337	ENSG00000172244.8	C5orf34	SE	chr5	-	43505549-43506394:43508576-43508666:43514805-43515078	1.0,1.0,1.0	0.862,0.555,0.471	-0.371	6.18725e-05
4886	ENSG00000234608.7	MAPKAPK5-AS1	RI	chr12	-	111841326-111841470:111841470-111841683:111841683-111841710	0.868,0.81,0.78	0.601,0.757,0.683	0.139	0.0108701		33354	ENSG00000117676.13	RPS6KA1	SE	chr1	+	26558806-26558937:26561044-26561134:26571448-26571508	1.0,1.0,1.0	1.0,0.333,0.555	-0.371	0.0243909
1251	ENSG00000133247.13	KMT5C	RI	chr19	+	55341793-55342046:55342046-55342214:55342214-55342380	0.305,0.135,0.154	0.02,0.061,0.098	0.138	0.00612817		51331	ENSG00000123415.15	SMUG1	SE	chr12	-	54187818-54187905:54188514-54188596:54188676-54188957	1.0,0.866,1.0	1.0,0.244,0.508	-0.371	0.00481599
1340	ENSG00000179832.17	MROH1	RI	chr8	+	144261113-144261216:144261216-144261283:144261283-144261349	0.395,0.336,0.221	0.134,0.174,0.235	0.136	0.0486562		47441	ENSG00000163291.14	PAQR3	SE	chr4	-	78930169-78930325:78935120-78935176:78939039-78939195	0.867,0.948,0.972	0.538,0.421,0.712	-0.372	1.245e-05
4158	ENSG00000159348.12	CYB5R1	RI	chr1	-	202965886-202966109:202966109-202966527:202966527-202966600	1.0,1.0,0.798	0.798,0.786,0.833	0.127	0.0353689		3240	ENSG00000215424.9	MCM3AP-AS1	SE	chr21	+	46229272-46229363:46236223-46236326:46240833-46242999	1.0,1.0,1.0	0.639,0.441,0.794	-0.375	0.000157846
6350	ENSG00000099331.13	MYO9B	RI	chr19	+	17211650-17211774:17211774-17211894:17211894-17213284	0.553,0.57,0.591	0.402,0.479,0.457	0.125	0.00218211		18331	ENSG00000234741.7	GAS5	SE	chr1	-	173864483-173864506:173865856-173865894:173866527-173866567	1.0,1.0,1.0	0.499,0.374,1.0	-0.376	0.00146559
2184	ENSG00000267796.7	LIN37	RI	chr19	+	35754245-35754319:35754319-35754392:35754392-35754519	0.13,0.094,0.23	0.019,0.032,0.031	0.124	0.000259838		64185	ENSG00000197467.14	COL13A1	SE	chr10	+	69947306-69947342:69953947-69954025:69957003-69957042	0.127,1.0,0.304	0.304,0.0,0.0	-0.376	0.0189813
4544	ENSG00000167257.10	RNF214	RI	chr11	+	117238600-117238646:117238646-117239800:117239800-117239860	0.936,0.949,0.9	0.877,0.722,0.821	0.122	0.0405435		99435	ENSG00000087903.12	RFX2	SE	chr19	-	6016089-6016271:6026162-6026237:6110392-6110482	0.769,1.0,1.0	0.129,0.8,0.7	-0.38	0.00677935
2527	ENSG00000126088.13	UROD	RI	chr1	+	45013908-45014070:45014070-45014735:45014735-45014836	1.0,0.968,1.0	0.963,0.789,0.856	0.12	0.00087842		1097	ENSG00000102003.10	SYP	SE	chrX	-	49194310-49194361:49197486-49197839:49198967-49199033	1.0,1.0,1.0	0.675,0.182,1.0	-0.381	0.0394946
4115	ENSG00000162032.15	SPSB3	RI	chr16	-	1777746-1777872:1777872-1777945:1777945-1778612	0.299,0.257,0.313	0.149,0.194,0.176	0.117	0.00120311		88241	ENSG00000267426.5	AC087289.3	SE	chr17	-	75904663-75904719:75909467-75909817:75912191-75912307	1.0,1.0,1.0	0.817,0.272,0.767	-0.381	0.00639878
3595	ENSG00000144591.18	GMPPA	RI	chr2	+	219505457-219505555:219505555-219505694:219505694-219505761	0.958,0.968,0.976	0.885,0.747,0.925	0.115	0.0016487		24788	ENSG00000172819.16	RARG	SE	chr12	-	53215645-53215794:53229841-53230053:53231168-53231232	0.674,1.0,1.0	0.131,1.0,0.398	-0.382	0.00314368
1789	ENSG00000113240.12	CLK4	RI	chr5	-	178617343-178617434:178617434-178618555:178618555-178618778	0.135,0.19,0.118	0.058,0.027,0.02	0.113	0.0025382		64704	ENSG00000165121.11	AL353743.1	SE	chr9	+	85806001-85806133:85822879-85823080:85837758-85837965	0.63,1.0,1.0	0.46,0.46,0.561	-0.383	0.0120182
2463	ENSG00000136826.14	KLF4	RI	chr9	-	107487027-107487192:107487192-107487294:107487294-107488267	0.229,0.026,0.073	0.0,0.0,0.0	0.109	0.0133087		39633	ENSG00000197935.6	ZNF311	SE	chr6	-	29003512-29003594:29003945-29004214:29005007-29005260	1.0,1.0,1.0	0.517,0.322,1.0	-0.387	0.000627248
431	ENSG00000147475.15	ERLIN2	RI	chr8	+	37744570-37744696:37744696-37745568:37745568-37746550	0.25,0.0,0.111	0.0,0.02,0.028	0.104	0.0011545		70342	ENSG00000156398.12	SFXN2	SE	chr10	+	102714537-102714681:102716613-102716711:102717702-102717780	0.751,0.768,0.911	0.601,0.091,0.576	-0.387	0.0466838
5229	ENSG00000122678.16	POLM	RI	chr7	-	44073782-44074025:44074025-44074397:44074397-44074530	1.0,0.966,0.883	0.944,0.739,0.86	0.102	0.00836181		56592	ENSG00000131374.14	TBC1D5	SE	chr3	-	17508473-17508605:17562018-17562142:17586352-17586557	1.0,1.0,1.0	0.732,0.75,0.353	-0.388	0.000207804
3300	ENSG00000213024.11	NUP62	RI	chr19	-	49927693-49927848:49927848-49929325:49929325-49929504	0.303,0.254,0.284	0.201,0.166,0.172	0.101	6.40958e-06		70746	ENSG00000119979.17	FAM45A	SE	chr10	+	119104763-119105022:119105310-119105495:119107947-119108096	1.0,1.0,1.0	0.527,0.308,1.0	-0.388	0.00646505
1431	ENSG00000145020.15	AMT	RI	chr3	-	49416777-49417367:49417367-49417614:49417614-49417718	0.53,1.0,1.0	1.0,0.44,0.79	0.1	0.0110694		17277	ENSG00000137210.13	TMEM14B	SE	chr6	+	10747758-10747881:10755141-10755232:10829006-10829205	1.0,1.0,1.0	0.0,1.0,0.832	-0.389	0.0265997
3514	ENSG00000197070.13	ARRDC1	RI	chr9	+	137612895-137613006:137613006-137613459:137613459-137613510	0.306,0.297,0.27	0.204,0.208,0.16	0.1	5.3323e-05		66866	ENSG00000164142.15	FAM160A1	SE	chr4	+	151409215-151409465:151454700-151454808:151566137-151566364	1.0,0.723,1.0	0.635,0.345,0.575	-0.389	0.0103249
5367	ENSG00000136717.14	BIN1	MXE	chr2	-	127051153-127051243:127052254-127052362:127053904-127054012:127057472-127057601	1.0,1.0,1.0	1.0,0.0,0.0	0.667	0.00353		48215	ENSG00000204843.12	DCTN1	SE	chr2	-	74378904-74378972:74390582-74390728:74391793-74391843	1.0,0.735,1.0	0.574,0.752,0.24	-0.39	0.00453363
13509	ENSG00000153066.12	TXNDC11	MXE	chr16	-	11700451-11700564:11703669-11703750:11721313-11721435:11721576-11721670	1.0,1.0,1.0	0.0,1.0,0.221	0.593	0.00136707		67737	ENSG00000078403.16	MLLT10	SE	chr10	+	21681331-21681376:21688490-21688538:21713771-21713950	0.602,1.0,0.0	0.431,0.0,0.0	-0.39	0.0430467
1216	ENSG00000149346.14	SLX4IP	MXE	chr20	+	10458175-10458231:10556230-10556320:10560699-10560820:10598674-10598752	0.693,1.0,0.798	0.361,0.0,0.361	0.59	0.0115174		93096	ENSG00000197912.15	SPG7	SE	chr16	+	89545871-89546030:89546131-89546181:89546657-89546760	1.0,1.0,0.6	0.428,0.0,1.0	-0.391	0.0415372
6944	ENSG00000224699.8	LAMTOR5-AS1	MXE	chr1	+	110412172-110412293:110413320-110413410:110414151-110414231:110416008-110416188	0.324,1.0,0.59	0.0,0.193,0.0	0.574	0.0033679		20275	ENSG00000213079.9	SCAF8	SE	chr6	+	154733324-154733930:154773988-154774072:154787860-154788022	0.88,1.0,1.0	0.719,0.497,0.48	-0.395	3.23813e-05
12606	ENSG00000257126.5	FOXG1-AS1	MXE	chr14	-	28738726-28738844:28741833-28741959:28762331-28762474:28765159-28765263	0.485,0.32,0.739	0.0,0.0,0.0	0.515	0.000113915		78200	ENSG00000111731.12	C2CD5	SE	chr12	-	22456970-22457161:22458483-22458585:22459491-22459542	1.0,0.728,1.0	0.308,1.0,0.229	-0.397	0.0217894
3668	ENSG00000121903.14	ZSCAN20	MXE	chr1	+	33488464-33488651:33489114-33489191:33489517-33489602:33491024-33491702	0.597,0.47,0.898	0.103,0.257,0.079	0.509	0.00328796		80418	ENSG00000088986.10	DYNLL1	SE	chr12	+	120469856-120470104:120488116-120488177:120493802-120493925	0.587,1.0,1.0	0.587,0.221,0.587	-0.397	0.0294437
15120	ENSG00000223546.6	LINC00630	MXE	chrX	+	102770351-102770420:102816991-102817082:102825992-102826169:102826968-102827144	0.731,0.62,0.671	0.214,0.28,0.0	0.509	0.00752142		17350	ENSG00000184640.17	SEPT9	SE	chr17	+	77281450-77281554:77294488-77294571:77294773-77294903	0.9,0.702,1.0	0.507,0.138,0.763	-0.398	0.0286748
11276	ENSG00000285533.1	AP001362.2	MXE	chr11	+	65663426-65663683:65665420-65665543:65666130-65666217:65671422-65671716	0.722,0.591,0.859	0.303,0.245,0.126	0.499	0.00738866		52526	ENSG00000173402.11	DAG1	SE	chr3	+	49487253-49487415:49492822-49492973:49510418-49510516	1.0,1.0,1.0	0.142,1.0,0.665	-0.398	0.0217729
11397	ENSG00000165521.15	EML5	MXE	chr14	-	88627645-88627819:88634468-88634489:88638808-88638907:88642892-88643022	0.733,1.0,1.0	0.407,0.578,0.255	0.498	0.00228934		14847	ENSG00000197008.9	ZNF138	SE	chr7	+	64794387-64794571:64815575-64815653:64831450-64832202	1.0,0.568,1.0	0.747,0.621,0.0	-0.4	0.038484
10945	ENSG00000103042.8	SLC38A7	MXE	chr16	-	58670112-58670167:58672095-58672243:58675939-58676121:58683954-58684110	1.0,1.0,1.0	0.915,0.264,0.35	0.49	0.000372809		52912	ENSG00000236039.2	AC019117.1	SE	chr7	-	17465169-17465226:17482526-17482782:17483405-17483534	1.0,1.0,0.768	0.252,0.315,1.0	-0.4	0.00175852
94	ENSG00000188917.14	TRMT2B	MXE	chrX	-	101036973-101037073:101041316-101041371:101051250-101051366:101051643-101051733	0.794,0.606,0.507	0.278,0.278,0.0	0.45	0.0459812		103155	ENSG00000101294.17	HM13	SE	chr20	+	31547381-31547606:31549028-31549114:31550063-31550121	0.835,1.0,0.954	0.729,0.467,0.388	-0.402	2.30531e-05
12663	ENSG00000183668.17	PSG9	MXE	chr19	-	43258201-43258456:43258856-43259135:43261859-43262138:43267783-43268149	0.375,0.6,0.778	0.0,0.333,0.105	0.438	0.0188357		46372	ENSG00000179818.13	PCBP1-AS1	SE	chr2	-	70051202-70051305:70059642-70059680:70083537-70083687	0.838,0.313,0.56	0.137,0.262,0.102	-0.403	0.0425069
7072	ENSG00000179818.13	PCBP1-AS1	MXE	chr2	-	70051202-70051305:70055655-70055910:70059642-70059680:70077300-70077381	0.764,0.0,0.844	0.0,0.302,0.0	0.435	0.00971251		87678	ENSG00000138606.19	SHF	SE	chr15	-	45170665-45172002:45172148-45172318:45175218-45175425	0.726,0.808,1.0	0.398,0.515,0.412	-0.403	0.00665943
14030	ENSG00000133466.13	C1QTNF6	MXE	chr22	-	37190864-37190928:37191671-37191737:37195380-37195512:37197602-37197841	0.433,0.697,1.0	0.203,0.277,0.38	0.423	0.0413362		85504	ENSG00000119688.20	ABCD4	SE	chr14	-	74295147-74295198:74296332-74296449:74302874-74302910	1.0,0.818,1.0	0.384,1.0,0.219	-0.405	0.00330816
8372	ENSG00000184182.18	UBE2F	MXE	chr2	+	237973091-237973225:238016565-238016633:238025341-238025412:238032221-238032254	0.458,1.0,0.112	0.202,0.0,0.112	0.419	0.0448519		48711	ENSG00000177565.16	TBL1XR1	SE	chr3	-	177131377-177131449:177160870-177160988:177197120-177197225	0.77,0.707,0.826	0.472,0.527,0.085	-0.406	0.00974966
12074	ENSG00000088986.10	DYNLL1	MXE	chr12	+	120469856-120470104:120488116-120488177:120493802-120493925:120495283-120495437	0.721,1.0,1.0	0.683,0.191,0.721	0.375	0.0177682		31831	ENSG00000091592.15	NLRP1	SE	chr17	-	5501813-5501872:5515472-5515517:5517745-5517887	0.434,1.0,1.0	0.0,0.606,0.606	-0.407	0.00648324
2112	ENSG00000175471.19	MCTP1	MXE	chr5	-	94912805-94912976:94917895-94917973:94931952-94931991:94940083-94940195	0.858,1.0,1.0	0.644,0.547,0.547	0.373	0.0318298		13993	ENSG00000083097.14	DOP1A	SE	chr6	+	83162789-83162919:83164659-83164719:83167861-83168331	0.681,0.151,0.393	0.0,0.0,0.0	-0.408	4.75381e-05
13540	ENSG00000174628.16	IQCK	MXE	chr16	+	19733697-19733827:19735352-19735450:19763847-19764112:19788837-19788922	0.754,1.0,0.916	0.79,0.432,0.358	0.363	0.0418439		26571	ENSG00000265479.6	DTX2P1-UPK3BP1-PMS2P11	SE	chr7	+	77015671-77015855:77018908-77018997:77023593-77023761	1.0,1.0,1.0	0.687,0.556,0.534	-0.408	1.61534e-05
10374	ENSG00000164024.11	METAP1	MXE	chr4	+	99035399-99035460:99035953-99036011:99037766-99037941:99039373-99039465	0.758,0.439,0.824	0.0,0.0,1.0	0.34	0.0358678		17259	ENSG00000137210.13	TMEM14B	SE	chr6	+	10747772-10747881:10749621-10749698:10829006-10829165	1.0,1.0,1.0	0.377,1.0,0.397	-0.409	0.00356485
4006	ENSG00000008513.15	ST3GAL1	MXE	chr8	-	133499134-133499189:133507198-133507321:133539636-133539729:133545773-133545926	0.91,1.0,0.894	0.646,0.745,0.457	0.319	0.00159635		81595	ENSG00000134291.11	TMEM106C	SE	chr12	+	47965281-47965345:47966682-47966732:47968132-47968171	0.818,0.0,0.75	0.272,0.07,0.0	-0.409	0.028581
12386	ENSG00000172766.18	NAA16	MXE	chr13	+	41331273-41331369:41336649-41336756:41355143-41355216:41358303-41358718	0.722,0.849,0.943	0.394,0.494,0.684	0.314	0.0300185		86145	ENSG00000120963.11	ZNF706	SE	chr8	-	101202332-101202447:101204649-101204693:101205434-101205682	1.0,0.822,0.436	0.436,0.181,0.412	-0.41	0.00974966
10694	ENSG00000107669.17	ATE1	MXE	chr10	-	121910905-121911151:121913789-121913893:121924265-121924329:121927843-121928063	0.586,0.609,0.389	0.109,0.237,0.308	0.31	0.0135595		8587	ENSG00000146733.13	PSPH	SE	chr7	-	56033960-56034106:56043147-56043261:56051313-56051392	1.0,0.221,1.0	0.175,0.075,0.739	-0.411	0.033956
6886	ENSG00000143847.15	PPFIA4	MXE	chr1	+	203048582-203048714:203048917-203048980:203049675-203049767:203051768-203051877	1.0,1.0,0.773	0.431,0.74,0.695	0.302	0.0421433		62895	ENSG00000118564.14	FBXL5	SE	chr4	-	15644492-15644708:15656228-15656342:15659740-15659867	1.0,1.0,0.459	0.221,1.0,0.0	-0.413	0.0200183
10176	ENSG00000134470.20	IL15RA	MXE	chr10	-	5959753-5959786:5960366-5960468:5963742-5963841:5966144-5966339	0.378,0.415,0.574	0.158,0.16,0.152	0.299	0.0413362		94851	ENSG00000196535.16	MYO18A	SE	chr17	-	29125892-29125967:29127851-29128544:29165941-29167021	1.0,1.0,1.0	0.347,1.0,0.414	-0.413	0.0126593
11938	ENSG00000123411.14	IKZF4	MXE	chr12	+	56019319-56019415:56023670-56023764:56024661-56024905:56025053-56025158	1.0,0.866,1.0	0.683,0.288,1.0	0.298	0.030646		5535	ENSG00000139116.18	KIF21A	SE	chr12	-	39326263-39326324:39330241-39330262:39330745-39330911	0.467,0.798,0.616	0.397,0.071,0.171	-0.414	0.00629196
3682	ENSG00000054654.16	SYNE2	MXE	chr14	+	64002719-64003330:64007042-64007222:64009965-64010116:64016472-64016631	0.854,0.725,0.609	0.451,0.412,0.451	0.291	0.00965991		66867	ENSG00000164142.15	FAM160A1	SE	chr4	+	151409351-151409465:151482523-151482648:151566137-151566258	1.0,0.685,1.0	0.685,0.165,0.592	-0.414	0.00603548
10191	ENSG00000165629.19	ATP5F1C	MXE	chr10	+	7800026-7800091:7802757-7802854:7806973-7807010:7807658-7807815	0.436,0.387,0.414	0.123,0.172,0.101	0.28	0		19201	ENSG00000150625.16	GPM6A	SE	chr4	-	175701574-175701767:175786871-175786917:175787335-175787387	0.337,0.753,0.433	0.0,0.276,0.0	-0.416	0.00177994
625	ENSG00000107036.11	RIC1	MXE	chr9	+	5747301-5747505:5753199-5753238:5753535-5753646:5754840-5754930	0.58,0.531,0.605	0.416,0.201,0.332	0.256	0.0419831		102836	ENSG00000125846.15	ZNF133	SE	chr20	+	18288282-18288604:18289898-18290074:18305667-18305807	0.696,0.133,0.647	0.096,0.133,0.0	-0.416	0.0238882
12024	ENSG00000177990.11	DPY19L2	MXE	chr12	-	63647244-63647365:63661343-63661481:63665834-63665859:63668056-63668542	0.184,0.398,0.28	0.0,0.0,0.105	0.252	0.00654679		41590	ENSG00000163596.16	ICA1L	SE	chr2	-	202828847-202829016:202870529-202870656:202871190-202871246	1.0,0.73,1.0	0.574,0.618,0.288	-0.417	0.0132521
1135	ENSG00000229180.7	AC006001.3	MXE	chr7	-	66573384-66573550:66576754-66576929:66588511-66588580:66592256-66592397	0.598,0.498,0.382	0.294,0.268,0.22	0.232	0.0240986		30640	ENSG00000213742.6	ZNF337-AS1	SE	chr20	+	25634728-25634827:25645530-25645648:25673851-25673908	0.77,0.77,1.0	0.0,0.784,0.482	-0.425	0.0325835
10628	ENSG00000156398.12	SFXN2	MXE	chr10	+	102714635-102714681:102716233-102716329:102717702-102717780:102726611-102726797	0.317,0.351,0.098	0.0,0.093,0.0	0.224	0.00328796		67240	ENSG00000103494.13	RPGRIP1L	SE	chr16	-	53619024-53619208:53622218-53622356:53636438-53636512	1.0,0.342,0.675	0.394,0.0,0.342	-0.427	0.0355221
8210	ENSG00000075711.20	DLG1	MXE	chr3	-	197069218-197069260:197075836-197075870:197076585-197076682:197081050-197081117	0.874,0.849,0.896	0.667,0.627,0.679	0.215	4.2913e-10		62360	ENSG00000090487.10	SPG21	SE	chr15	-	64976474-64976555:64989168-64989273:64989664-64989707	1.0,1.0,0.638	0.37,0.54,0.439	-0.43	0.00206219
685	ENSG00000196118.11	CCDC189	MXE	chr16	-	30757430-30757654:30759011-30759101:30759653-30759724:30760283-30760453	0.759,0.685,0.635	0.487,0.447,0.521	0.208	0.044115		72842	ENSG00000026508.18	CD44	SE	chr11	+	35204511-35204640:35208104-35208206:35211245-35211253	1.0,1.0,0.885	0.849,0.426,0.316	-0.431	0.000519287
10629	ENSG00000156398.12	SFXN2	MXE	chr10	+	102714635-102714681:102716233-102716329:102724935-102724996:102726611-102726797	0.197,0.3,0.3	0.0,0.176,0.0	0.207	0.00965991		103461	ENSG00000088367.21	EPB41L1	SE	chr20	+	36122678-36122747:36173763-36173954:36175550-36175715	1.0,1.0,1.0	0.523,0.637,0.547	-0.431	0.000422863
2208	ENSG00000158402.19	CDC25C	MXE	chr5	-	138319218-138319374:138325814-138325904:138326020-138326054:138328483-138328529	0.459,0.516,0.438	0.19,0.298,0.34	0.195	0.0279941		9975	ENSG00000124831.18	LRRFIP1	SE	chr2	+	237756094-237756187:237757455-237757548:237758728-237758821	0.552,0.649,1.0	0.291,0.133,0.48	-0.432	0.013411
11584	ENSG00000214548.16	MEG3	MXE	chr14	+	100829033-100829749:100831015-100831094:100831420-100831534:100835735-100835879	0.366,0.0,0.243	0.0,0.0,0.057	0.184	0.0358678		69701	ENSG00000145014.17	TMEM44	SE	chr3	-	194615568-194615697:194617635-194617776:194623223-194623310	1.0,1.0,0.562	0.643,0.0,0.607	-0.437	0.0166904
1567	ENSG00000159433.11	STARD9	MXE	chr15	+	42575669-42575762:42583345-42583415:42585520-42585634:42634855-42634972	1.0,0.894,1.0	0.678,0.692,1.0	0.175	0.0158054		88314	ENSG00000138614.14	INTS14	SE	chr15	-	65584769-65584888:65593427-65593569:65595732-65595825	1.0,1.0,1.0	0.434,1.0,0.254	-0.437	0.0278861
7972	ENSG00000198270.12	TMEM116	MXE	chr12	-	111932584-111932659:111933885-111936830:111937159-111937243:111938160-111938210	0.847,0.899,0.902	0.618,0.747,0.764	0.173	0.0175088		26944	ENSG00000118495.19	PLAGL1	SE	chr6	-	143947984-143948460:143960472-143960556:143968906-143968950	1.0,1.0,1.0	0.49,0.793,0.39	-0.442	0.0328518
13487	ENSG00000103199.13	ZNF500	MXE	chr16	-	4760491-4760588:4762270-4762335:4762572-4762713:4765564-4766004	0.243,0.356,0.228	0.098,0.164,0.045	0.173	0.044115		73485	ENSG00000172716.16	SLFN11	SE	chr17	-	35363536-35363826:35367540-35367700:35373581-35373620	1.0,0.325,1.0	0.0,0.0,1.0	-0.442	0.000515916
4246	ENSG00000143207.20	COP1	MXE	chr1	-	176116623-176116681:176135009-176135086:176184632-176184692:176206571-176206691	0.459,0.494,0.491	0.299,0.321,0.319	0.168	0.0164521		87676	ENSG00000138606.19	SHF	SE	chr15	-	45171593-45172002:45172146-45172318:45175218-45175425	0.668,0.848,1.0	0.436,0.432,0.317	-0.444	0.00671561
12082	ENSG00000058272.18	PPP1R12A	MXE	chr12	-	79798493-79798584:79805591-79805768:79806165-79806333:79807225-79807330	0.291,0.312,0.386	0.219,0.15,0.145	0.158	0.0105071		1350	ENSG00000130962.17	PRRG1	SE	chrX	+	37349329-37349469:37386598-37386689:37406208-37406259	0.554,1.0,0.171	0.0,0.383,0.0	-0.447	0.0300693
68	ENSG00000175556.16	LONRF3	MXE	chrX	+	118978344-118978463:118982820-118982943:118986924-118987080:118989407-118989672	0.966,0.958,0.923	0.729,0.897,0.754	0.156	0.0105071		96891	ENSG00000109066.13	TMEM104	SE	chr17	+	74776519-74776577:74777266-74777375:74788788-74788870	0.49,0.556,0.679	0.055,0.204,0.126	-0.447	0.000733842
7920	ENSG00000173402.11	DAG1	MXE	chr3	+	49470353-49470433:49487253-49487415:49488697-49488745:49492822-49492973	1.0,0.93,0.943	1.0,0.689,0.717	0.156	0.0262573		87311	ENSG00000137841.11	PLCB2	SE	chr15	-	40290760-40290837:40291017-40291183:40291264-40291487	1.0,1.0,0.839	0.321,1.0,0.169	-0.45	0.00260502
8211	ENSG00000075711.20	DLG1	MXE	chr3	-	197069218-197069260:197075836-197075870:197076585-197076685:197081050-197081117	0.917,0.889,0.917	0.754,0.715,0.79	0.155	8.68364e-09		100994	ENSG00000267360.6	AC012309.1	SE	chr19	-	37190023-37190150:37198938-37199054:37207039-37207254	1.0,1.0,1.0	0.628,0.484,0.529	-0.453	0.00207903
8565	ENSG00000136682.14	CBWD2	MXE	chr2	+	113460672-113460719:113462407-113462494:113465128-113465173:113471032-113471089	0.93,1.0,0.938	0.822,0.841,0.767	0.146	0.00406397		97834	ENSG00000064547.13	LPAR2	SE	chr19	-	19627396-19627504:19627753-19627969:19628091-19628167	1.0,1.0,1.0	0.588,0.38,0.671	-0.454	4.55855e-05
8636	ENSG00000168385.17	SEPT2	MXE	chr2	+	241315354-241315610:241316421-241316540:241320202-241320287:241324215-241324241	0.111,0.2,0.214	0.098,0.0,0.0	0.142	0.0240059		94634	ENSG00000034152.18	MAP2K3	SE	chr17	+	21287990-21288091:21295674-21295769:21298412-21298479	0.478,1.0,1.0	0.234,0.71,0.169	-0.455	0.0213416
2555	ENSG00000173210.19	ABLIM3	MXE	chr5	+	149239758-149239888:149240675-149240774:149242490-149242538:149244880-149245015	0.065,0.219,0.173	0.0,0.036,0.0	0.14	0.00527133		100063	ENSG00000196646.11	ZNF136	SE	chr19	+	12163063-12163206:12169281-12169391:12185784-12185911	1.0,0.063,0.365	0.0,0.0,0.06	-0.456	0.0420674
7681	ENSG00000139218.17	SCAF11	MXE	chr12	-	45922462-45922582:45922935-45923154:45924727-45925074:45926141-45928859	0.712,0.731,0.688	0.634,0.562,0.528	0.136	0.0420955		43312	ENSG00000250903.8	GMDS-DT	SE	chr6	+	2269697-2269799:2271815-2273417:2283498-2283774	1.0,1.0,1.0	0.577,0.544,0.505	-0.458	0.0149088
12379	ENSG00000102710.19	SUPT20H	MXE	chr13	-	37022010-37022080:37024034-37024193:37024339-37024442:37025319-37025437	0.722,0.838,0.793	0.619,0.697,0.639	0.133	0.0300185		77418	ENSG00000111247.14	RAD51AP1	SE	chr12	+	4543762-4543911:4545781-4545832:4548091-4548175	0.0,1.0,1.0	0.0,0.199,0.427	-0.458	0.0137774
13740	ENSG00000072736.18	NFATC3	MXE	chr16	+	68181474-68181530:68183239-68183366:68190767-68191775:68226349-68226471	0.38,0.35,0.411	0.265,0.239,0.242	0.132	0.00752142		33798	ENSG00000100614.17	PPM1A	SE	chr14	+	60250430-60250481:60277312-60277365:60282683-60283089	0.689,0.425,0.425	0.156,0.0,0.0	-0.461	0.00137538
982	ENSG00000150433.9	TMEM218	MXE	chr11	-	125101200-125101303:125102636-125102809:125110490-125110549:125110643-125110746	0.106,0.217,0.265	0.094,0.1,0.0	0.131	0.046645		47871	ENSG00000168259.14	DNAJC7	SE	chr17	-	42000481-42000570:42003358-42003557:42017051-42017162	0.853,1.0,0.481	0.165,0.517,0.268	-0.461	0.0210867
1708	ENSG00000128656.13	CHN1	MXE	chr2	-	174824433-174824518:174846879-174846957:174877839-174878128:174915057-174915171	0.486,0.509,0.538	0.383,0.372,0.403	0.125	0.0188357		62972	ENSG00000163138.18	PACRGL	SE	chr4	+	20700458-20700617:20701757-20701884:20702140-20702221	1.0,1.0,1.0	1.0,0.245,0.351	-0.468	0.00334804
5251	ENSG00000204120.14	GIGYF2	MXE	chr2	+	232703423-232703489:232724573-232724691:232731121-232731258:232735154-232735238	1.0,0.965,1.0	0.785,1.0,0.811	0.123	0.0420955		69696	ENSG00000145014.17	TMEM44	SE	chr3	-	194615568-194615697:194616480-194616587:194623223-194623310	1.0,1.0,0.0	0.0,0.225,0.368	-0.469	0.0135395
2207	ENSG00000158402.19	CDC25C	MXE	chr5	-	138291969-138292116:138319218-138319374:138326020-138326054:138328483-138328529	0.205,0.344,0.221	0.093,0.165,0.148	0.121	0.0299635		15110	ENSG00000100418.7	DESI1	SE	chr22	-	41603258-41603381:41607261-41607331:41620751-41621096	1.0,1.0,1.0	0.405,1.0,0.185	-0.47	0.0153625
8228	ENSG00000159685.10	CHCHD6	MXE	chr3	+	126733077-126733222:126852643-126852730:126914679-126914750:126957415-126957933	0.294,0.139,0.144	0.101,0.031,0.104	0.114	0.0136059		96124	ENSG00000206417.8	H1FX-AS1	SE	chr3	+	129315519-129315638:129318542-129318637:129323349-129323604	1.0,0.753,1.0	0.604,0.289,0.449	-0.47	0.000352944
13180	ENSG00000149596.6	JPH2	MXE	chr20	-	44115664-44116386:44118504-44118623:44159617-44160407:44186326-44187578	0.717,0.666,0.746	0.561,0.6,0.636	0.111	0.047555		21415	ENSG00000076513.16	ANKRD13A	SE	chr12	+	110019138-110019328:110021107-110021301:110025741-110025823	1.0,1.0,1.0	0.246,0.503,0.839	-0.471	6.28426e-05
65	ENSG00000102078.15	SLC25A14	MXE	chrX	+	130349250-130349345:130349823-130349867:130350645-130350731:130358639-130358735	0.151,0.221,0.053	0.04,0.022,0.061	0.101	0.0105071		60302	ENSG00000151687.14	ANKAR	SE	chr2	+	189696149-189696369:189705022-189705224:189706937-189707146	1.0,1.0,1.0	1.0,0.0,0.586	-0.471	0.00229871
5009	ENSG00000172531.14	PPP1CA	A5SS	chr11	-	67419407-67419597:67419443-67419597:67401067-67401199	1.0,1.0,1.0	0.0,1.0,0.0	0.667	0.00187519		22484	ENSG00000237651.6	C2orf74	SE	chr2	+	61145130-61145196:61159317-61159439:61163051-61163163	1.0,1.0,0.767	0.658,0.0,0.687	-0.474	0.0024784
6399	ENSG00000108515.17	ENO3	A5SS	chr17	+	4951118-4951214:4951118-4951182:4951827-4951914	1.0,1.0,1.0	0.0,0.0,1.0	0.667	0.0379727		60234	ENSG00000119487.16	MAPKAP1	SE	chr9	-	125467971-125468109:125471082-125471237:125478079-125478182	0.424,0.495,0.746	0.0,0.098,0.123	-0.481	0.00901983
2935	ENSG00000223960.6	AC009948.1	A5SS	chr2	+	178426365-178426703:178426365-178426661:178430694-178430889	1.0,1.0,1.0	0.796,0.319,0.0	0.628	0.000393225		38283	ENSG00000155761.13	SPAG17	SE	chr1	-	118031745-118031867:118036625-118036883:118039291-118039342	1.0,1.0,1.0	0.354,1.0,0.196	-0.483	0.000750944
144	ENSG00000205643.10	CDPF1	A5SS	chr22	-	46247105-46247221:46247109-46247221:46246672-46246795	1.0,0.796,1.0	0.0,0.28,1.0	0.505	0.00234509		45979	ENSG00000205531.12	NAP1L4	SE	chr11	-	2983745-2983813:2988076-2988126:2989128-2989197	1.0,1.0,1.0	0.272,1.0,0.272	-0.485	0.0430719
6689	ENSG00000183010.16	PYCR1	A5SS	chr17	-	81937179-81937239:81937192-81937239:81936747-81936861	1.0,0.535,1.0	0.116,0.763,0.155	0.5	0.0264583		98618	ENSG00000198521.11	ZNF43	SE	chr19	-	21845391-21845506:21851162-21851360:21851904-21852029	0.0,1.0,0.462	0.0,0.0,0.0	-0.487	0.0401379
5044	ENSG00000111237.18	VPS29	A5SS	chr12	-	110499456-110499546:110499534-110499546:110496822-110497002	0.783,0.396,1.0	0.0,0.396,0.396	0.462	0.00143827		66581	ENSG00000130714.15	POMT1	SE	chr9	+	131502901-131503313:131504188-131504340:131506402-131506453	1.0,1.0,1.0	0.271,0.497,0.763	-0.49	4.13538e-05
1212	ENSG00000173230.15	GOLGB1	A5SS	chr3	-	121669196-121669355:121669211-121669355:121668060-121668158	0.522,0.82,0.476	0.062,0.312,0.24	0.401	0.0237073		79152	ENSG00000167779.8	IGFBP6	SE	chr12	+	53097666-53098051:53099266-53099324:53101040-53101160	1.0,1.0,1.0	0.265,1.0,0.265	-0.49	0.000416323
4304	ENSG00000108352.12	RAPGEFL1	A5SS	chr17	+	40181298-40181486:40181298-40181373:40181615-40181694	1.0,1.0,0.862	0.363,0.773,0.556	0.39	0.00278774		32403	ENSG00000115977.18	AAK1	SE	chr2	-	69465845-69466551:69480859-69480961:69495984-69496080	1.0,0.64,1.0	0.308,0.454,0.404	-0.491	0.00263154
3854	ENSG00000168385.17	SEPT2	A5SS	chr2	+	241316421-241316555:241316421-241316540:241317498-241317599	0.803,0.602,0.342	0.275,0.142,0.199	0.377	0.0263441		77920	ENSG00000275778.2	PRH1-PRR4	SE	chr12	-	10883060-10883096:10884153-10884275:10973654-10973721	1.0,0.562,0.892	0.524,0.355,0.099	-0.492	0.0122627
1056	ENSG00000111445.13	RFC5	A5SS	chr12	+	118017689-118017852:118017689-118017815:118019071-118019136	0.572,0.5,0.127	0.0,0.0,0.127	0.357	0.00159512		44975	ENSG00000169398.19	PTK2	SE	chr8	-	140890542-140890769:140948665-140948723:140983841-140984155	0.683,1.0,0.783	0.419,0.194,0.365	-0.496	0.00813316
5183	ENSG00000111247.14	RAD51AP1	A5SS	chr12	+	4543762-4543911:4543762-4543904:4545218-4545312	0.193,0.364,0.489	0.0,0.0,0.0	0.349	0.00200435		9721	ENSG00000164638.10	SLC29A4	SE	chr7	+	5291729-5291821:5294864-5294934:5298987-5299126	1.0,1.0,0.845	0.505,0.338,0.505	-0.499	0.000242546
6355	ENSG00000197912.15	SPG7	A5SS	chr16	+	89545871-89546181:89545871-89546030:89546657-89546760	1.0,1.0,0.713	0.554,0.142,1.0	0.339	0.0237073		65621	ENSG00000230601.6	TEX48	SE	chr9	-	114666433-114666746:114668205-114668337:114682034-114682066	1.0,1.0,1.0	0.347,0.809,0.347	-0.499	0.000850499
3553	ENSG00000236283.4	AC019197.1	A5SS	chr2	+	164959254-164959360:164959254-164959329:164960898-164960967	1.0,1.0,0.0	0.0,1.0,0.0	0.333	0.00314017		90908	ENSG00000243716.10	NPIPB5	SE	chr16	+	22513763-22513921:22519137-22519269:22523819-22523908	1.0,1.0,1.0	0.347,1.0,0.15	-0.501	0.0112547
5359	ENSG00000170581.13	STAT2	A5SS	chr12	-	56349344-56349509:56349425-56349509:56348751-56348804	1.0,1.0,1.0	1.0,0.633,0.368	0.333	0.0011422		94015	ENSG00000133466.13	C1QTNF6	SE	chr22	-	37190864-37190928:37195380-37195512:37197602-37197841	1.0,1.0,1.0	0.15,1.0,0.347	-0.501	0.000441218
6870	ENSG00000188002.10	AC026412.1	A5SS	chr5	-	1632643-1632906:1632844-1632906:1602690-1602735	0.749,1.0,1.0	0.669,0.46,0.63	0.33	0.0205185		82886	ENSG00000170919.15	TPT1-AS1	SE	chr13	+	45379898-45380001:45383759-45383838:45389734-45389820	1.0,0.466,1.0	0.395,0.359,0.207	-0.502	0.0312719
3655	ENSG00000157036.12	EXOG	A5SS	chr3	+	38497628-38497689:38497628-38497684:38501354-38501494	1.0,1.0,0.744	0.744,0.356,0.659	0.328	0.00423678		103550	ENSG00000162521.18	RBBP4	SE	chr1	+	32672790-32672901:32679634-32679698:32680525-32680651	0.208,0.38,1.0	0.08,0.0,0.0	-0.503	0.00325961
514	ENSG00000160410.14	SHKBP1	A5SS	chr19	+	40577556-40577709:40577556-40577630:40578461-40578542	1.0,0.723,0.495	1.0,0.246,0.0	0.324	0.00695788		45848	ENSG00000183207.13	RUVBL2	SE	chr19	+	48993888-48993923:48994779-48994933:49003278-49003334	1.0,1.0,1.0	0.33,0.496,0.663	-0.504	0.00175352
4344	ENSG00000124067.16	SLC12A4	A5SS	chr16	-	67962243-67963559:67963436-67963559:67961574-67961706	1.0,1.0,0.6	0.6,0.561,0.47	0.323	0.0366163		77044	ENSG00000213020.9	ZNF611	SE	chr19	-	52706653-52706864:52707420-52707542:52714014-52714141	1.0,0.733,0.733	0.524,0.355,0.064	-0.508	0.00113103
4838	ENSG00000049449.9	RCN1	A5SS	chr11	+	32103003-32103202:32103003-32103158:32103280-32103480	1.0,1.0,1.0	1.0,0.436,0.607	0.319	0.00257249		1000	ENSG00000089472.16	HEPH	SE	chrX	+	66208114-66208246:66255034-66255141:66258839-66258979	1.0,1.0,0.368	0.225,0.214,0.368	-0.52	0.00206343
3885	ENSG00000165699.14	TSC1	A5SS	chr9	-	132925586-132927304:132927200-132927304:132923347-132923492	1.0,1.0,1.0	0.575,0.496,1.0	0.31	0.00143827		39824	ENSG00000157224.15	CLDN12	SE	chr7	+	90463239-90463371:90466409-90466513:90479227-90479274	1.0,1.0,1.0	1.0,0.44,0.0	-0.52	0.000985909
5034	ENSG00000149262.16	INTS4	A5SS	chr11	-	77987528-77987698:77987603-77987698:77981458-77981576	1.0,0.823,1.0	0.399,1.0,0.499	0.308	0.00435351		101228	ENSG00000223546.6	LINC00630	SE	chrX	+	102839800-102839863:102845856-102846020:102865041-102865152	1.0,1.0,1.0	0.588,0.526,0.323	-0.521	0.000988615
916	ENSG00000197062.11	ZSCAN26	A5SS	chr6	+	28271853-28272336:28271853-28271934:28272669-28272787	0.95,0.705,0.619	0.464,0.568,0.351	0.297	0.042515		31283	ENSG00000127124.15	HIVEP3	SE	chr1	-	41700915-41700995:41865547-41865615:42035806-42035925	0.507,0.733,1.0	0.0,0.256,0.407	-0.526	0.00557763
917	ENSG00000197062.11	ZSCAN26	A5SS	chr6	+	28271853-28272339:28271853-28271934:28272669-28272787	0.959,0.734,0.696	0.499,0.592,0.427	0.29	0.0172465		26390	ENSG00000196188.10	CTSE	SE	chr1	-	206012307-206012406:206012507-206012649:206013771-206013894	0.719,0.506,0.885	0.434,0.093,0.0	-0.528	0.00629196
3716	ENSG00000137449.15	CPEB2	A5SS	chr4	+	15007304-15007595:15007304-15007586:15017187-15017278	0.239,0.43,0.361	0.173,0.0,0.0	0.286	0.0103974		26668	ENSG00000008513.15	ST3GAL1	SE	chr8	-	133507198-133507321:133539636-133539729:133545773-133545926	1.0,1.0,0.787	0.425,0.425,0.345	-0.531	0.000189466
3476	ENSG00000082258.12	CCNT2	A5SS	chr2	+	134946100-134946465:134946100-134946146:134947735-134947899	0.637,0.515,0.315	0.248,0.06,0.305	0.285	0.0201431		49230	ENSG00000176261.15	ZBTB8OS	SE	chr1	-	32631826-32631879:32632207-32632345:32634767-32634792	1.0,0.257,0.342	0.0,0.0,0.0	-0.533	0.0019711
6265	ENSG00000140854.12	KATNB1	A5SS	chr16	+	57736977-57737067:57736977-57737063:57737225-57737283	0.754,1.0,0.867	0.493,0.703,0.619	0.269	0.0285218		27234	ENSG00000116750.13	UCHL5	SE	chr1	-	193051791-193051817:193059412-193059515:193059632-193060080	1.0,1.0,1.0	0.372,0.372,0.639	-0.539	6.18725e-05
2320	ENSG00000164609.9	SLU7	A5SS	chr5	-	160418595-160419081:160419022-160419081:160417111-160417241	1.0,0.0,1.0	0.206,0.28,0.721	0.264	0.0375425		54443	ENSG00000157036.12	EXOG	SE	chr3	+	38497628-38497684:38500089-38500164:38501354-38501494	1.0,1.0,0.857	0.571,0.0,0.666	-0.54	0.000220288
5179	ENSG00000002016.17	RAD52	A5SS	chr12	-	949601-949665:949605-949665:932974-933076	1.0,0.915,1.0	0.63,0.493,1.0	0.264	0.00780784		29431	ENSG00000228409.6	CCT6P1	SE	chr7	+	65751141-65751278:65752163-65752310:65754526-65754661	1.0,1.0,0.557	0.219,0.602,0.112	-0.541	0.00263522
2443	ENSG00000187634.11	SAMD11	A5SS	chr1	+	939274-939460:939274-939412:942135-942251	0.602,1.0,1.0	0.777,0.396,0.645	0.261	0.00649258		18268	ENSG00000234741.7	GAS5	SE	chr1	-	173864483-173864506:173865228-173865282:173866527-173866567	1.0,1.0,1.0	0.0,0.355,1.0	-0.548	0.000797983
4411	ENSG00000001631.15	KRIT1	A5SS	chr7	-	92245789-92245914:92245843-92245914:92244901-92245171	1.0,1.0,1.0	0.669,0.786,0.801	0.248	0.0048888		20577	ENSG00000105889.15	STEAP1B	SE	chr7	-	22494771-22494886:22495361-22495480:22632809-22632925	1.0,1.0,0.625	0.0,0.357,0.625	-0.548	0.0187737
2988	ENSG00000204406.13	MBD5	A5SS	chr2	+	148483109-148484135:148483109-148483436:148485741-148485950	0.731,1.0,1.0	1.0,0.645,0.356	0.243	0.0255853		25777	ENSG00000104691.14	UBXN8	SE	chr8	+	30744189-30744277:30751506-30751518:30753034-30753105	1.0,0.649,1.0	0.0,0.0,1.0	-0.55	3.27826e-05
5099	ENSG00000183426.16	NPIPA1	A5SS	chr16	+	14929250-14930031:14929250-14929421:14930165-14930322	0.906,0.797,1.0	0.525,0.836,0.621	0.24	0.025757		8727	ENSG00000232110.7	AL353751.1	SE	chr10	+	89283764-89283891:89285035-89285264:89291986-89292125	1.0,1.0,1.0	0.165,1.0,0.165	-0.557	0.00176784
355	ENSG00000010361.13	FUZ	A5SS	chr19	-	49812614-49812736:49812637-49812736:49811630-49811699	1.0,1.0,1.0	0.722,0.565,1.0	0.238	0.0375425		24471	ENSG00000121903.14	ZSCAN20	SE	chr1	+	33488464-33488651:33489114-33489191:33491024-33491702	1.0,0.569,0.789	0.18,0.397,0.099	-0.561	0.00506091
2028	ENSG00000020577.13	SAMD4A	A5SS	chr14	+	54784339-54784447:54784339-54784381:54784536-54784620	1.0,0.675,1.0	0.829,0.357,0.792	0.232	0.00631854		73247	ENSG00000197889.9	MEIG1	SE	chr10	+	14959509-14959557:14970247-14970546:14972512-14972681	1.0,1.0,1.0	0.571,0.666,0.077	-0.562	3.45569e-05
2802	ENSG00000134825.15	TMEM258	A5SS	chr11	-	61790374-61790602:61790422-61790602:61789784-61789990	0.708,0.769,0.78	0.608,0.467,0.56	0.207	0.0205185		87949	ENSG00000182718.16	ANXA2	SE	chr15	-	60349074-60349197:60360940-60361054:60386027-60386086	1.0,1.0,1.0	0.0,0.312,1.0	-0.563	0.00117642
2233	ENSG00000143761.15	ARF1	A5SS	chr1	+	228083149-228083374:228083149-228083309:228097077-228097262	0.862,1.0,1.0	0.819,0.798,0.626	0.206	0.0162953		4967	ENSG00000078304.19	PPP2R5C	SE	chr14	+	101786017-101786183:101831700-101831804:101836168-101836432	0.44,1.0,0.252	0.0,0.0,0.0	-0.564	0.0060174
3927	ENSG00000144747.16	TMF1	A5SS	chr3	-	69047348-69048562:69047357-69048562:69044491-69044595	0.32,0.191,0.239	0.043,0.105,0.0	0.201	0.0255853		14850	ENSG00000197008.9	ZNF138	SE	chr7	+	64794387-64794571:64830939-64831076:64831450-64831803	1.0,0.723,1.0	0.51,0.51,0.0	-0.568	0.00123883
6824	ENSG00000174652.18	ZNF266	A5SS	chr19	-	9419050-9419299:9419216-9419299:9418765-9418895	0.912,1.0,1.0	0.876,0.68,0.755	0.2	0.0145742		63205	ENSG00000245213.6	AC105285.1	SE	chr4	-	173144235-173145511:173166123-173166299:173167961-173168113	1.0,1.0,0.733	0.071,0.478,0.478	-0.569	0.000136783
531	ENSG00000119801.12	YPEL5	A5SS	chr2	+	30148244-30148541:30148244-30148305:30156627-30156792	1.0,1.0,0.941	1.0,0.73,0.64	0.19	0.00396892		3402	ENSG00000160201.11	U2AF1	SE	chr21	-	43095693-43095743:43100452-43100519:43101365-43101432	1.0,1.0,0.805	0.509,0.0,0.58	-0.572	0.00460909
3415	ENSG00000099326.8	MZF1	A5SS	chr19	-	58573054-58573575:58573372-58573575:58570993-58571429	0.771,0.693,0.833	0.653,0.447,0.642	0.185	0.0375425		49523	ENSG00000114982.17	KANSL3	SE	chr2	-	96619671-96619762:96628571-96628648:96636920-96637228	0.248,0.569,1.0	0.099,0.0,0.0	-0.573	0.000797983
281	ENSG00000124222.22	STX16	A5SS	chr20	+	58652072-58652138:58652072-58652087:58659622-58659634	0.642,0.671,0.531	0.396,0.517,0.383	0.183	0.0209285		69644	ENSG00000080189.14	SLC35C2	SE	chr20	-	46358386-46358558:46358690-46358763:46364370-46364458	1.0,1.0,1.0	0.668,0.212,0.402	-0.573	1.2695e-06
5192	ENSG00000126746.17	ZNF384	A5SS	chr12	-	6689097-6689510:6689367-6689510:6688166-6688226	0.629,0.704,0.654	0.504,0.467,0.476	0.18	0.00200435		54416	ENSG00000157036.12	EXOG	SE	chr3	+	38497628-38497689:38498766-38498836:38498925-38498989	1.0,1.0,1.0	0.254,1.0,0.0	-0.582	0.00211253
3227	ENSG00000116127.17	ALMS1	A5SS	chr2	+	73489633-73491498:73489633-73490158:73519774-73520016	1.0,0.82,1.0	0.891,0.895,0.508	0.175	0.0234506		71974	ENSG00000130956.13	HABP4	SE	chr9	+	96458378-96458541:96465709-96465778:96484461-96484633	1.0,1.0,1.0	0.255,1.0,0.0	-0.582	0.0489362
6939	ENSG00000011332.19	DPF1	A5SS	chr19	-	38217459-38217876:38217797-38217876:38216352-38216403	1.0,1.0,1.0	0.964,0.739,0.795	0.167	0.000393225		45647	ENSG00000224699.8	LAMTOR5-AS1	SE	chr1	+	110412172-110412293:110413320-110413410:110416008-110416186	0.135,1.0,1.0	0.0,0.384,0.0	-0.584	0.003782
4756	ENSG00000129749.3	CHRNA10	A5SS	chr11	-	3669733-3669941:3669795-3669941:3669195-3669350	0.414,1.0,1.0	0.514,0.414,1.0	0.162	0.0241862		90791	ENSG00000218510.8	LINC00339	SE	chr1	+	22025492-22025945:22027413-22027534:22030279-22030374	1.0,1.0,1.0	0.099,0.623,0.525	-0.584	3.61759e-05
4999	ENSG00000174483.19	BBS1	A5SS	chr11	+	66531655-66532205:66531655-66531742:66532295-66533603	1.0,1.0,1.0	0.641,0.883,1.0	0.159	0.0172465		29430	ENSG00000228409.6	CCT6P1	SE	chr7	+	65751141-65751278:65752163-65752202:65754526-65754661	1.0,1.0,0.613	0.15,0.543,0.165	-0.585	0.0129505
3876	ENSG00000088340.15	FER1L4	A5SS	chr20	-	35560122-35560638:35560539-35560638:35559340-35559627	0.208,1.0,1.0	0.313,0.42,1.0	0.158	0.0211834		63939	ENSG00000158286.12	RNF207	SE	chr1	+	6206535-6206726:6207378-6207511:6208880-6209025	1.0,1.0,1.0	0.232,0.864,0.15	-0.585	3.45569e-05
54	ENSG00000271147.7	ARMCX5-GPRASP2	A5SS	chrX	+	102599705-102599859:102599705-102599847:102601463-102601509	0.288,0.066,0.198	0.0,0.0,0.085	0.156	0.00502834		64444	ENSG00000137877.9	SPTBN5	SE	chr15	-	41858889-41858980:41860585-41860758:41861418-41861496	1.0,1.0,1.0	0.316,0.481,0.425	-0.593	1.33605e-07
2384	ENSG00000130349.9	C6orf203	A5SS	chr6	+	107028212-107028797:107028212-107028271:107039748-107040230	0.274,0.325,0.383	0.13,0.147,0.243	0.154	0.0241862		26946	ENSG00000118495.19	PLAGL1	SE	chr6	-	143947984-143948460:143964786-143964818:143968906-143968978	1.0,1.0,1.0	0.0,0.767,0.452	-0.594	0.0137774
3104	ENSG00000269893.6	SNHG8	A5SS	chr4	+	118278708-118279137:118278708-118278792:118279388-118279431	0.708,0.728,0.701	0.57,0.581,0.535	0.15	5.4589e-09		72626	ENSG00000148950.10	IMMP1L	SE	chr11	-	31447982-31449091:31460625-31460714:31509518-31509574	0.715,1.0,0.715	0.238,0.238,0.173	-0.594	0.00162017
5185	ENSG00000111247.14	RAD51AP1	A5SS	chr12	+	4543762-4543911:4543762-4543904:4546308-4546418	0.177,0.229,0.301	0.112,0.085,0.067	0.148	0.0285694		7244	ENSG00000228192.7	AL512353.1	SE	chr1	-	42834680-42835131:42837669-42837939:42842774-42842916	1.0,1.0,1.0	0.681,0.262,0.262	-0.598	0.000370213
98	ENSG00000102225.15	CDK16	A5SS	chrX	+	47222260-47222380:47222260-47222342:47223551-47223759	0.528,0.648,0.498	0.395,0.456,0.385	0.146	0.0418646		62129	ENSG00000168038.10	ULK4	SE	chr3	-	41912806-41912899:41915976-41916052:41918456-41918540	1.0,1.0,1.0	0.57,0.306,0.306	-0.606	1.47186e-07
5639	ENSG00000100888.13	CHD8	A5SS	chr14	-	21430800-21431858:21431810-21431858:21428963-21429335	0.858,0.911,0.855	0.757,0.682,0.747	0.146	0.00200435		56658	ENSG00000149179.13	C11orf49	SE	chr11	+	46936696-46936851:47137315-47137560:47137644-47137729	0.654,0.502,1.0	0.051,0.04,0.24	-0.608	0.00302363
1139	ENSG00000164199.17	ADGRV1	A5SS	chr5	+	90690796-90691041:90690796-90690958:90692604-90692786	1.0,0.876,1.0	0.616,0.828,1.0	0.144	0.019737		56505	ENSG00000206562.11	METTL6	SE	chr3	-	15383642-15384187:15384480-15384573:15411244-15411437	1.0,0.629,0.198	0.0,0.0,0.0	-0.609	0.00163139
3417	ENSG00000167220.11	HDHD2	A5SS	chr18	-	47136301-47136449:47136338-47136449:47134495-47134704	0.228,0.338,0.174	0.103,0.071,0.138	0.143	0.0238183		101605	ENSG00000141551.14	CSNK1D	SE	chr17	-	82266707-82266894:82272069-82272316:82273305-82273731	0.805,1.0,1.0	0.429,0.32,0.22	-0.612	1.11045e-05
3850	ENSG00000172888.11	ZNF621	A5SS	chr3	+	40524877-40525274:40524877-40525038:40525778-40525864	1.0,1.0,0.911	0.907,0.659,0.922	0.141	0.0182907		10675	ENSG00000115762.16	PLEKHB2	SE	chr2	+	131125752-131125905:131130720-131130760:131140166-131140275	1.0,1.0,1.0	0.542,0.612,0.0	-0.615	1.38563e-05
1890	ENSG00000158321.16	AUTS2	A5SS	chr7	+	70766113-70766355:70766113-70766334:70768023-70768068	0.575,0.498,0.51	0.389,0.368,0.427	0.133	0.0103274		81202	ENSG00000099817.11	POLR2E	SE	chr19	-	1089471-1089551:1093755-1093903:1095258-1095336	0.847,1.0,1.0	1.0,0.0,0.0	-0.616	0.000985909
6019	ENSG00000178802.17	MPI	A5SS	chr15	+	74890041-74890201:74890041-74890089:74891378-74891579	0.102,0.063,0.23	0.038,0.014,0.0	0.114	0.000757327		37960	ENSG00000127191.17	TRAF2	SE	chr9	+	136886517-136886541:136889669-136889736:136890348-136890542	1.0,1.0,0.256	0.147,0.0,0.256	-0.618	0.00880932
6680	ENSG00000185504.16	FAAP100	A5SS	chr17	-	81551731-81552052:81551927-81552052:81550247-81551203	0.639,0.655,0.662	0.543,0.543,0.531	0.113	0.00780784		55161	ENSG00000169026.12	SLC49A3	SE	chr4	-	684718-684856:685834-685911:686531-686690	1.0,0.397,1.0	0.497,0.0,0.0	-0.633	0.0237203
4957	ENSG00000168002.11	POLR2G	A5SS	chr11	+	62761794-62762866:62761794-62761904:62765181-62765232	1.0,0.975,1.0	0.745,0.951,0.942	0.112	0.00117041		61327	ENSG00000067221.13	STOML1	SE	chr15	-	73990350-73990457:73990814-73990945:73992212-73992318	0.727,1.0,1.0	0.081,0.399,0.347	-0.633	0.000106355
4273	ENSG00000198561.13	CTNND1	A5SS	chr11	+	57761796-57762068:57761796-57762046:57791384-57791673	0.235,0.145,0.191	0.056,0.099,0.085	0.11	0.0341862		89625	ENSG00000100983.10	GSS	SE	chr20	-	34936942-34937023:34942487-34942627:34945952-34946098	0.673,0.508,1.0	0.279,0.0,0.0	-0.634	0.00809018
6275	ENSG00000100865.14	CINP	A5SS	chr14	-	102355767-102355897:102355771-102355897:102348510-102348759	0.979,0.952,1.0	1.0,0.644,0.957	0.11	0.0234506		59574	ENSG00000183137.14	CEP57L1	SE	chr6	+	109100191-109100286:109106034-109106090:109140420-109140675	1.0,1.0,1.0	0.0,1.0,0.094	-0.635	0.0193897
149	ENSG00000183569.17	SERHL2	A5SS	chr22	+	42571120-42571901:42571120-42571203:42572435-42572529	1.0,0.913,1.0	0.872,0.92,0.806	0.105	0.0209877		30557	ENSG00000173137.11	ADCK5	SE	chr8	+	144374054-144374107:144375465-144375637:144377392-144377490	1.0,0.582,0.65	0.0,0.085,0.236	-0.637	2.94632e-05
6896	ENSG00000105393.15	BABAM1	A5SS	chr19	+	17267442-17267527:17267442-17267516:17268801-17269091	1.0,1.0,1.0	1.0,1.0,0.689	0.104	0.0285309		92202	ENSG00000102901.12	CENPT	SE	chr16	-	67835171-67835300:67835537-67835658:67847579-67847752	0.453,1.0,1.0	0.0,0.0,0.525	-0.643	0.00119389
2686	ENSG00000014914.20	MTMR11	A5SS	chr1	-	149933609-149933942:149933854-149933942:149933405-149933530	1.0,1.0,1.0	0.779,0.916,1.0	0.102	0.0462653		75026	ENSG00000284922.1	AP000812.5	SE	chr11	+	72080844-72080885:72088339-72088380:72093495-72093701	1.0,1.0,0.148	0.207,0.0,0.0	-0.647	0.00206219
2829	ENSG00000082153.17	BZW1	A5SS	chr2	+	200811545-200811946:200811545-200811727:200813207-200813281	0.241,0.329,0.218	0.158,0.157,0.167	0.102	0.0380612		85576	ENSG00000172113.9	NME6	SE	chr3	-	48294523-48294803:48296118-48296236:48296726-48296829	1.0,0.817,1.0	0.157,0.427,0.271	-0.654	0.000102965
3510	ENSG00000163479.13	SSR2	A5SS	chr1	-	156012384-156012565:156012394-156012565:156011809-156011887	1.0,1.0,1.0	1.0,1.0,0.701	0.1	0.025024		18036	ENSG00000108021.20	FAM208B	SE	chr10	+	5684947-5685175:5714134-5714207:5720543-5720668	0.573,1.0,0.402	0.0,0.0,0.0	-0.658	0.00127559
5621	ENSG00000131080.14	EDA2R	A3SS	chrX	-	66602632-66602797:66599473-66599866:66599473-66599860	1.0,0.0,1.0	0.0,0.0,0.0	0.667	8.72035e-05		65083	ENSG00000135365.15	PHF21A	SE	chr11	-	46092182-46092223:46117921-46118145:46118741-46118800	1.0,1.0,1.0	0.516,0.5,0.0	-0.661	3.23813e-05
6164	ENSG00000204622.11	HLA-J	A3SS	chr6	+	30008584-30008701:30009037-30009177:30009144-30009177	0.0,1.0,1.0	0.0,0.0,0.0	0.667	0.00245848		54922	ENSG00000198925.11	ATG9A	SE	chr2	-	219225410-219225572:219227921-219228079:219229534-219229618	0.795,1.0,1.0	0.122,0.195,0.493	-0.662	2.94632e-05
10619	ENSG00000143498.17	TAF1A	A3SS	chr1	-	222588442-222588565:222579758-222579890:222579758-222579872	0.0,1.0,1.0	0.182,0.0,0.0	0.606	0.00342108		9462	ENSG00000197056.10	ZMYM1	SE	chr1	+	35079385-35079442:35093319-35093441:35095818-35095891	1.0,1.0,1.0	0.0,1.0,0.0	-0.667	0.0217978
3634	ENSG00000166619.13	BLCAP	A3SS	chr20	-	37527792-37527878:37521318-37521451:37521318-37521409	1.0,0.811,1.0	0.0,0.438,0.757	0.539	0.0376042		44586	ENSG00000282057.1	AC092807.3	SE	chr1	-	85496165-85496281:85575831-85575904:85576656-85576858	1.0,1.0,1.0	1.0,0.0,0.0	-0.667	0.0236347
10494	ENSG00000065717.14	TLE2	A3SS	chr19	-	3019698-3019773:3019282-3019466:3019282-3019463	1.0,0.844,1.0	0.296,0.567,0.44	0.514	0.000662045		32400	ENSG00000115977.18	AAK1	SE	chr2	-	69465845-69466551:69476879-69476990:69495984-69496080	1.0,0.534,1.0	0.0,0.364,0.076	-0.698	0.00144167
8345	ENSG00000151135.9	TMEM263	A3SS	chr12	+	106957081-106957149:106959269-106959385:106959287-106959385	0.908,1.0,1.0	0.501,0.641,0.284	0.494	2.84316e-05		65082	ENSG00000135365.15	PHF21A	SE	chr11	-	46092182-46092223:46117921-46118114:46118741-46118800	1.0,1.0,1.0	0.225,0.466,0.179	-0.71	1.59612e-06
10346	ENSG00000205885.7	C1RL-AS1	A3SS	chr12	+	7110297-7110572:7111024-7111606:7111370-7111606	1.0,1.0,1.0	0.644,0.601,0.311	0.481	0.0145462		7045	ENSG00000285106.1	AC016831.6	SE	chr7	-	130881057-130884396:130912109-130912152:130945719-130945835	1.0,1.0,1.0	0.0,0.608,0.225	-0.722	1.1282e-06
2615	ENSG00000163870.15	TPRA1	A3SS	chr3	-	127595451-127595690:127594799-127595140:127594799-127594933	1.0,0.715,1.0	1.0,0.0,0.295	0.473	0.0244245		78543	ENSG00000015153.14	YAF2	SE	chr12	-	42161612-42161765:42210354-42210454:42210547-42210619	1.0,1.0,1.0	0.285,0.456,0.0	-0.753	4.3404e-09
10617	ENSG00000143498.17	TAF1A	A3SS	chr1	-	222584127-222584297:222579758-222579890:222579758-222579825	1.0,1.0,1.0	0.676,0.41,0.511	0.468	0.00143484		44164	ENSG00000080298.15	RFX3	SE	chr9	-	3395471-3395596:3488775-3488895:3490278-3490345	1.0,1.0,1.0	0.0,0.356,0.356	-0.763	1.58841e-05
10956	ENSG00000125846.15	ZNF133	A3SS	chr20	+	18305084-18305178:18305667-18305807:18305680-18305807	1.0,1.0,1.0	0.786,0.58,0.356	0.426	2.26805e-05		20692	ENSG00000138777.19	PPA2	SE	chr4	-	105370836-105370873:105399036-105399164:105446382-105446502	1.0,1.0,1.0	0.0,0.0,0.518	-0.827	3.38962e-09
5518	ENSG00000114933.15	INO80D	A3SS	chr2	-	206063150-206063244:206062798-206063045:206062798-206062954	1.0,1.0,0.651	0.383,0.134,0.882	0.417	0.0334899		87804	ENSG00000069974.15	RAB27A	SE	chr15	-	55234781-55234956:55237315-55237442:55238402-55238491	1.0,1.0,0.519	0.0,0.0,0.0	-0.84	9.1682e-09
3968	ENSG00000163219.11	ARHGAP25	A3SS	chr2	+	68787839-68787956:68807272-68807480:68807275-68807480	1.0,1.0,1.0	0.595,1.0,0.197	0.403	0.0294853		28698	ENSG00000055163.19	CYFIP2	SE	chr5	+	157296672-157296774:157302793-157302890:157307760-157307864	1.0,1.0,0.548	0.0,0.0,0.0	-0.849	0.000195985
4820	ENSG00000237765.6	FAM200B	A3SS	chr4	+	15681860-15682021:15684849-15684959:15684885-15684959	1.0,1.0,1.0	0.287,0.547,1.0	0.389	0.0240646		20593	ENSG00000138801.8	PAPSS1	SE	chr4	-	107701170-107701285:107718341-107718396:107720003-107720213	1.0,1.0,1.0	0.0,0.422,0.0	-0.859	9.52342e-11
9279	ENSG00000172183.14	ISG20	A3SS	chr15	+	88639342-88639594:88650234-88652310:88652169-88652310	0.534,1.0,1.0	0.14,0.627,0.632	0.378	0.0103105		15061	ENSG00000197948.10	FCHSD1	SE	chr5	-	141641701-141641757:141642396-141642503:141644217-141644438	1.0,1.0,1.0	0.195,0.0,0.0	-0.935	1.68297e-10
2673	ENSG00000248323.6	LUCAT1	A3SS	chr5	-	91313637-91313777:91310626-91313229:91310626-91311032	1.0,0.519,1.0	0.683,0.471,0.276	0.363	0.00839496		19392	ENSG00000162994.15	CLHC1	SE	chr2	-	55222234-55222493:55228031-55228204:55232235-55232354	1.0,1.0,1.0	0.0,0.0,0.0	-1	4.3404e-09
2131	ENSG00000164073.10	MFSD8	A3SS	chr4	-	127930682-127930817:127921523-127921963:127921523-127921771	1.0,0.834,1.0	0.546,0.433,0.778	0.359	0.00239354		93583	ENSG00000139990.17	DCAF5	SE	chr14	-	69122216-69122360:69149430-69149503:69152413-69152599	1.0,1.0,1.0	0.0,0.0,0.0	-1	8.34353e-12
2786	ENSG00000115274.14	INO80B	A3SS	chr2	+	74455108-74455296:74455390-74455598:74455405-74455598	1.0,1.0,1.0	0.405,1.0,0.548	0.349	0.000894349		867	ENSG00000204536.13	CCHCR1	RI	chr6	-	31156730-31156836:31156836-31157022:31157022-31157089	0.722,0.791,0.849	0.921,0.874,0.87	-0.101	0.0129011
3925	ENSG00000205771.6	CATSPER2P1	A3SS	chr15	-	43746213-43746285:43745021-43745170:43745021-43745167	0.746,0.551,0.0	0.089,0.0,0.164	0.348	0.0176877		2255	ENSG00000128604.19	IRF5	RI	chr7	+	128947022-128947056:128947056-128947229:128947229-128947535	0.028,0.066,0.066	0.113,0.263,0.088	-0.101	0.00282344
9943	ENSG00000166579.15	NDEL1	A3SS	chr17	+	8436650-8436694:8443926-8444357:8444259-8444357	0.918,0.801,0.832	0.553,0.676,0.279	0.348	0.0294853		2336	ENSG00000142541.16	RPL13A	RI	chr19	+	49489849-49489912:49489912-49490231:49490231-49490297	0.217,0.231,0.203	0.281,0.3,0.386	-0.105	0.000802882
5155	ENSG00000146243.13	IRAK1BP1	A3SS	chr6	+	78897828-78897959:78898063-78903102:78902618-78903102	1.0,1.0,1.0	0.606,0.753,0.629	0.337	0.0364525		3956	ENSG00000176058.12	TPRN	RI	chr9	-	137191616-137192174:137192174-137192258:137192258-137192365	0.013,0.021,0.022	0.062,0.161,0.161	-0.109	0
9536	ENSG00000117640.17	MTFR1L	A3SS	chr1	+	25820442-25820659:25822995-25823128:25823018-25823128	1.0,1.0,1.0	0.52,0.634,0.846	0.333	0.000113428		6197	ENSG00000170889.13	RPS9	RI	chr19	+	54206275-54206462:54206462-54206552:54206552-54206724	0.502,0.511,0.544	0.638,0.652,0.597	-0.11	0.0011052
1418	ENSG00000204713.10	TRIM27	A3SS	chr6	-	28911695-28911718:28903001-28908840:28903001-28904665	0.849,1.0,1.0	0.779,0.508,0.588	0.325	0.000515406		4282	ENSG00000198830.10	HMGN2	RI	chr1	+	26473482-26473585:26473585-26473702:26473702-26473732	0.821,0.823,0.878	0.962,0.926,0.966	-0.111	1.05012e-05
2269	ENSG00000123737.12	EXOSC9	A3SS	chr4	+	121811582-121811671:121813754-121814047:121813865-121814047	1.0,0.863,1.0	0.632,0.632,0.632	0.322	0.022843		3451	ENSG00000132323.8	ILKAP	RI	chr2	-	238194274-238194331:238194331-238194781:238194781-238194870	0.06,0.142,0.136	0.148,0.288,0.249	-0.116	0.0268977
3665	ENSG00000048707.15	VPS13D	A3SS	chr1	+	12338230-12338305:12341779-12341885:12341782-12341885	0.495,0.797,0.0	0.329,0.0,0.0	0.321	0.0339463		2976	ENSG00000182224.11	CYB5D1	RI	chr17	+	7858402-7858479:7858479-7858605:7858605-7858824	0.036,0.046,0.041	0.155,0.26,0.063	-0.118	7.12542e-05
5686	ENSG00000113163.16	COL4A3BP	A3SS	chr5	-	75411010-75411103:75400204-75403058:75400204-75400297	1.0,1.0,1.0	1.0,0.51,0.556	0.311	0.0365638		4028	ENSG00000100911.15	PSME2	RI	chr14	-	24145709-24145896:24145896-24146207:24146207-24146240	0.235,0.156,0.21	0.337,0.35,0.289	-0.125	0.000565008
22	ENSG00000071889.16	FAM3A	A3SS	chrX	-	154508473-154508597:154507810-154507882:154507810-154507861	1.0,1.0,1.0	1.0,0.672,0.397	0.31	0.0109133		4749	ENSG00000198919.12	DZIP3	RI	chr3	+	108647942-108648112:108648112-108648917:108648917-108648962	0.028,0.038,0.049	0.273,0.111,0.117	-0.129	0.00729312
5438	ENSG00000116560.10	SFPQ	A3SS	chr1	-	35177988-35178036:35176377-35176474:35176377-35176471	1.0,1.0,1.0	0.648,0.864,0.578	0.303	9.40495e-05		1771	ENSG00000177595.17	PIDD1	RI	chr11	-	800761-800912:800912-800984:800984-801120	0.205,0.143,0.146	0.289,0.307,0.293	-0.132	0.0022184
9443	ENSG00000153048.10	CARHSP1	A3SS	chr16	-	8868048-8868401:8860104-8860309:8860104-8860218	1.0,1.0,1.0	1.0,0.713,0.383	0.301	0.00623765		3011	ENSG00000115677.16	HDLBP	RI	chr2	-	241268953-241269105:241269105-241269205:241269205-241269295	0.705,0.836,0.848	1.0,0.954,0.85	-0.138	0.0326622
358	ENSG00000099977.14	DDT	A3SS	chr22	-	23973767-23973943:23973103-23973347:23973103-23973343	0.262,0.41,0.448	0.057,0.163,0.0	0.3	0.00527192		742	ENSG00000214087.8	ARL16	RI	chr17	-	81682033-81682149:81682149-81682490:81682490-81682675	0.518,0.505,0.505	0.699,0.655,0.639	-0.155	0.00155446
6466	ENSG00000213930.11	GALT	A3SS	chr9	+	34647088-34647258:34647540-34648171:34648114-34648171	1.0,1.0,1.0	1.0,0.472,0.632	0.299	0.0089247		1268	ENSG00000139200.13	PIANP	RI	chr12	-	6693791-6695057:6695057-6695429:6695429-6695651	0.797,0.907,0.778	0.969,1.0,1.0	-0.162	0.000595482
6468	ENSG00000213930.11	GALT	A3SS	chr9	+	34647088-34647258:34648047-34648171:34648114-34648171	1.0,1.0,1.0	1.0,0.717,0.408	0.292	0.0254233		5627	ENSG00000179954.15	SSC5D	RI	chr19	+	55489005-55489032:55489032-55489353:55489353-55489662	0.137,0.0,0.0	0.0,0.241,0.388	-0.164	0.0386789
8575	ENSG00000083544.14	TDRD3	A3SS	chr13	+	60439687-60439772:60444682-60444748:60444686-60444748	1.0,1.0,0.493	0.745,0.415,0.493	0.28	0.0476126		1748	ENSG00000121716.20	PILRB	RI	chr7	+	100352563-100352914:100352914-100352996:100352996-100353123	0.221,0.257,0.223	0.444,0.367,0.388	-0.166	0.0022184
5421	ENSG00000122335.15	SERAC1	A3SS	chr6	-	158158272-158158364:158150452-158150589:158150452-158150587	1.0,0.664,1.0	0.747,0.559,0.526	0.277	0.00370352		5958	ENSG00000089685.14	BIRC5	RI	chr17	+	78215965-78216066:78216066-78216663:78216663-78216781	0.737,0.752,0.901	0.892,1.0,1.0	-0.167	0.00266742
3742	ENSG00000227372.12	TP73-AS1	A3SS	chr1	-	3743060-3743190:3742803-3742983:3742803-3742957	0.221,0.415,0.233	0.0,0.0,0.048	0.274	0.000161547		1509	ENSG00000173209.23	AHSA2P	RI	chr2	+	61185501-61185618:61185618-61186445:61186445-61186497	0.151,0.105,0.194	0.423,0.372,0.19	-0.178	0.00990802
1017	ENSG00000105926.15	MPP6	A3SS	chr7	+	24574012-24574278:24623662-24623784:24623665-24623784	0.424,0.227,0.534	0.0,0.0,0.395	0.263	0.0269736		4988	ENSG00000111653.19	ING4	RI	chr12	-	6652270-6652309:6652309-6652661:6652661-6652770	0.889,0.682,0.7	0.935,0.96,0.915	-0.18	0.0237052
4073	ENSG00000012504.14	NR1H4	A3SS	chr12	+	100534889-100535023:100536506-100536610:100536511-100536610	0.436,0.097,0.244	0.0,0.0,0.0	0.259	0.0351056		2234	ENSG00000182796.14	TMEM198B	RI	chr12	+	55834850-55835615:55835615-55836125:55836125-55836246	0.829,0.626,1.0	1.0,1.0,1.0	-0.182	0.00723493
1704	ENSG00000127990.17	SGCE	A3SS	chr7	-	94623324-94623397:94618757-94618935:94618757-94618932	1.0,1.0,1.0	0.495,0.746,1.0	0.253	0.0121719		2957	ENSG00000158850.14	B4GALT3	RI	chr1	-	161176433-161176579:161176579-161176911:161176911-161177106	0.313,0.205,0.258	0.391,0.51,0.463	-0.196	0.0133588
826	ENSG00000084676.15	NCOA1	A3SS	chr2	+	24762686-24762776:24768220-24770702:24768223-24770702	1.0,0.951,1.0	0.685,0.88,0.632	0.251	0.000113428		1174	ENSG00000147813.15	NAPRT	RI	chr8	-	143576645-143576842:143576842-143577268:143577268-143577399	0.821,0.605,0.62	0.845,0.884,0.956	-0.213	0.0109564
10857	ENSG00000256683.6	ZNF350	A3SS	chr19	-	51974345-51974531:51969004-51969145:51969004-51969131	0.407,0.103,0.234	0.0,0.0,0.0	0.248	0.0105116		4901	ENSG00000089157.15	RPLP0	RI	chr12	-	120199309-120199485:120199485-120201082:120201082-120201110	0.647,0.639,0.624	0.845,0.892,0.814	-0.214	8.2192e-12
10388	ENSG00000152223.13	EPG5	A3SS	chr18	-	45884616-45884811:45882273-45882487:45882273-45882431	1.0,1.0,1.0	0.889,0.813,0.56	0.246	0.0305834		4992	ENSG00000111653.19	ING4	RI	chr12	-	6652661-6652767:6652767-6652944:6652944-6653050	0.091,0.174,0.17	0.273,0.444,0.367	-0.216	0.002345
5673	ENSG00000178809.11	TRIM73	A3SS	chr7	+	75404838-75405069:75405181-75405605:75405184-75405605	1.0,1.0,1.0	0.71,0.735,0.831	0.241	0.000515406		2502	ENSG00000158411.11	MITD1	RI	chr2	-	99169262-99169470:99169470-99169549:99169549-99169610	0.295,0.17,0.202	0.353,0.455,0.511	-0.217	0.00584962
6881	ENSG00000225077.3	LINC00337	A3SS	chr1	+	6237244-6237345:6237469-6237848:6237813-6237848	0.751,0.751,1.0	0.576,0.613,0.602	0.237	0.0416498		4363	ENSG00000167995.15	BEST1	RI	chr11	+	61955106-61955201:61955201-61955717:61955717-61955951	1.0,0.157,0.473	0.573,1.0,0.711	-0.218	0.0395662
4965	ENSG00000168890.13	TMEM150A	A3SS	chr2	-	85601883-85602064:85601020-85601482:85601020-85601107	0.885,1.0,1.0	1.0,0.655,0.614	0.205	0.00245848		5186	ENSG00000100599.15	RIN3	RI	chr14	+	92684986-92685150:92685150-92687685:92687685-92688049	0.487,0.831,0.694	0.85,1.0,0.818	-0.219	0.0139385
3752	ENSG00000227036.7	LINC00511	A3SS	chr17	-	72428235-72428298:72420699-72421066:72420699-72420964	0.581,0.439,0.563	0.278,0.366,0.331	0.203	0.0149407		5845	ENSG00000120699.12	EXOSC8	RI	chr13	+	37002933-37003007:37003007-37004476:37004476-37004561	0.541,1.0,0.798	1.0,1.0,1.0	-0.22	0.00340352
3983	ENSG00000073331.17	ALPK1	A3SS	chr4	+	112382503-112382552:112411722-112412025:112411826-112412025	0.469,0.036,0.181	0.0,0.078,0.0	0.203	0.00771668		2167	ENSG00000162772.16	ATF3	RI	chr1	+	212619045-212619266:212619266-212619357:212619357-212619555	0.623,1.0,0.713	1.0,1.0,1.0	-0.221	0.0139385
5537	ENSG00000144283.21	PKP4	A3SS	chr2	+	158631752-158631941:158634069-158634289:158634072-158634289	0.822,0.768,0.837	0.602,0.636,0.609	0.193	0.000205718		5711	ENSG00000161960.14	EIF4A1	RI	chr17	+	7574259-7574308:7574308-7574521:7574521-7574678	0.792,0.694,0.759	1.0,1.0,0.921	-0.225	9.48037e-05
2883	ENSG00000120896.13	SORBS3	A3SS	chr8	+	22554451-22554608:22554862-22554980:22554907-22554980	0.822,1.0,1.0	0.628,0.864,0.754	0.192	0.0103162		4346	ENSG00000161265.14	U2AF1L4	RI	chr19	-	35743154-35743205:35743205-35743295:35743295-35743345	0.789,0.555,0.827	1.0,0.849,1.0	-0.226	0.00537213
7649	ENSG00000110075.14	PPP6R3	A3SS	chr11	+	68575957-68576043:68587926-68588024:68587944-68588024	1.0,1.0,0.949	0.624,0.835,0.936	0.185	0.00239816		1972	ENSG00000004139.13	SARM1	RI	chr17	+	28388173-28388276:28388276-28388359:28388359-28388539	0.491,0.794,0.75	0.72,1.0,1.0	-0.228	0.00398449
752	ENSG00000114107.8	CEP70	A3SS	chr3	-	138591853-138591956:138572858-138572984:138572858-138572914	1.0,1.0,1.0	0.841,0.685,0.932	0.181	0.000351466		5839	ENSG00000161653.10	NAGS	RI	chr17	+	44006528-44006709:44006709-44007322:44007322-44007494	0.553,0.841,0.811	0.905,1.0,1.0	-0.233	0.0407845
1166	ENSG00000119599.16	DCAF4	A3SS	chr14	+	72939801-72939902:72940219-72940377:72940251-72940377	0.866,0.941,0.974	0.719,0.85,0.7	0.171	0.0115392		31	ENSG00000130822.15	PNCK	RI	chrX	-	153672565-153672697:153672697-153673008:153673008-153673078	0.0,0.0,0.0	0.245,0.075,0.393	-0.238	0.0012539
2080	ENSG00000214331.8	AC009053.1	A3SS	chr16	-	74338738-74338894:74338444-74338660:74338444-74338578	0.139,0.294,0.185	0.088,0.035,0.0	0.165	0.00335229		5332	ENSG00000129197.14	RPAIN	RI	chr17	+	5425970-5426082:5426082-5428070:5428070-5428211	0.561,0.603,0.713	0.819,0.851,0.942	-0.245	0.00902119
2385	ENSG00000138382.14	METTL5	A3SS	chr2	-	169819560-169819643:169812456-169812524:169812456-169812506	0.0,0.129,0.365	0.0,0.0,0.0	0.165	0.00295477		3421	ENSG00000008300.16	CELSR3	RI	chr3	-	48641850-48642009:48642009-48642357:48642357-48642467	0.07,0.086,0.023	0.193,0.358,0.394	-0.255	0.000595482
7709	ENSG00000158636.16	EMSY	A3SS	chr11	+	76539598-76539640:76542167-76542367:76542215-76542367	0.0,0.112,0.452	0.047,0.033,0.0	0.161	0.0129025		3554	ENSG00000114626.17	ABTB1	RI	chr3	+	127677464-127677563:127677563-127677675:127677675-127677843	0.0,0.049,0.0	0.4,0.416,0.0	-0.256	0.00285139
3391	ENSG00000159214.12	CCDC24	A3SS	chr1	+	43992522-43992639:43993803-43993964:43993839-43993964	1.0,0.547,1.0	0.79,0.617,0.662	0.159	0.0357123		54	ENSG00000188917.14	TRMT2B	RI	chrX	-	101051250-101051366:101051366-101051643:101051643-101051733	0.519,0.691,0.6	0.782,0.928,0.91	-0.27	0.00665397
10444	ENSG00000142765.17	SYTL1	A3SS	chr1	+	27347966-27348012:27349079-27349152:27349115-27349152	1.0,1.0,1.0	0.787,1.0,0.744	0.156	0.00345424		5155	ENSG00000163702.19	IL17RC	RI	chr3	+	9923880-9924137:9924137-9924231:9924231-9924291	0.734,0.71,0.495	0.947,1.0,0.821	-0.276	0.0104907
9383	ENSG00000007541.16	PIGQ	A3SS	chr16	+	579068-579180:580182-580972:580857-580972	0.812,0.756,0.806	0.629,0.592,0.688	0.155	0.000613165		1021	ENSG00000138760.9	SCARB2	RI	chr4	-	76163224-76163383:76163383-76166168:76166168-76166301	0.169,1.0,0.092	1.0,0.132,1.0	-0.29	0.0281594
3417	ENSG00000048162.20	NOP16	A3SS	chr5	-	176388432-176388975:176386839-176386926:176386839-176386909	0.154,0.213,0.239	0.022,0.085,0.042	0.152	1.4183e-05		2415	ENSG00000178904.18	DPY19L3	RI	chr19	+	32467473-32467626:32467626-32468730:32468730-32468813	0.471,0.406,1.0	0.769,1.0,1.0	-0.297	0.00182237
8724	ENSG00000153558.15	FBXL2	A3SS	chr3	+	33373091-33373160:33373240-33373355:33373259-33373355	0.275,0.0,0.165	0.0,0.0,0.0	0.147	0.00110988		1591	ENSG00000067445.20	TRO	RI	chrX	+	54926582-54926625:54926625-54927042:54927042-54927105	0.105,0.0,0.235	0.283,0.513,0.5	-0.319	0.0188235
6262	ENSG00000142920.16	AZIN2	A3SS	chr1	+	33098066-33098179:33117901-33120530:33120043-33120530	1.0,0.749,1.0	0.72,0.602,1.0	0.142	0.0395336		5585	ENSG00000102904.14	TSNAXIP1	RI	chr16	+	67825666-67826076:67826076-67826151:67826151-67826282	0.0,0.181,0.0	0.454,0.399,0.285	-0.319	0.0022184
4746	ENSG00000164045.11	CDC25A	A3SS	chr3	-	48183799-48183836:48182928-48183030:48182928-48183027	0.748,0.662,0.764	0.587,0.612,0.555	0.14	0.00674924		3259	ENSG00000163481.7	RNF25	RI	chr2	-	218668078-218668146:218668146-218668604:218668604-218668679	0.41,1.0,0.609	1.0,1.0,1.0	-0.327	0.000243614
7932	ENSG00000010295.19	IFFO1	A3SS	chr12	-	6548424-6548545:6548064-6548160:6548064-6548157	0.72,0.869,0.759	0.641,0.669,0.63	0.136	0.0157722		2005	ENSG00000143630.9	HCN3	RI	chr1	+	155283973-155284135:155284135-155284538:155284538-155284757	0.386,0.829,0.486	1.0,0.692,1.0	-0.33	0.00529961
1465	ENSG00000137434.11	C6orf52	A3SS	chr6	-	10687479-10687561:10686965-10687164:10686965-10687056	1.0,1.0,1.0	1.0,0.603,1.0	0.132	0.0468371		1434	ENSG00000145020.15	AMT	RI	chr3	-	49418970-49419151:49419151-49419259:49419259-49419405	0.367,0.367,0.0	0.582,0.607,0.537	-0.331	0.00706552
3743	ENSG00000227372.12	TP73-AS1	A3SS	chr1	-	3743060-3743190:3742803-3742983:3742803-3742960	0.048,0.115,0.25	0.0,0.0,0.024	0.13	0.0119767		4168	ENSG00000203780.10	FANK1	RI	chr10	+	126009053-126009131:126009131-126009221:126009221-126009592	0.0,0.0,0.0	0.533,0.384,0.082	-0.333	8.99851e-05
126	ENSG00000049769.12	PPP1R3F	A3SS	chrX	+	49281405-49281461:49281980-49282063:49281983-49282063	0.775,0.656,0.784	0.62,0.611,0.596	0.129	0.0406952		2207	ENSG00000273136.6	NBPF26	RI	chr1	+	120805417-120805458:120805458-120805555:120805555-120805765	0.123,0.08,0.232	0.252,0.784,0.414	-0.338	0.0377029
3719	ENSG00000182796.14	TMEM198B	A3SS	chr12	+	55831256-55831349:55832958-55833541:55833446-55833541	1.0,1.0,0.917	0.755,0.782,1.0	0.127	0.0195666		114	ENSG00000215301.10	DDX3X	RI	chrX	+	41337407-41337465:41337465-41339038:41339038-41339083	0.387,0.342,0.244	0.725,0.499,0.784	-0.345	0.0102739
1321	ENSG00000032444.16	PNPLA6	A3SS	chr19	+	7535508-7535577:7535788-7536020:7535932-7536020	0.601,0.713,0.619	0.533,0.547,0.489	0.121	0.0149407		4242	ENSG00000103042.8	SLC38A7	RI	chr16	-	58675939-58676121:58676121-58676288:58676288-58676346	0.485,0.667,0.515	1.0,0.934,0.767	-0.345	0.00665397
751	ENSG00000114107.8	CEP70	A3SS	chr3	-	138591853-138591956:138572858-138572932:138572858-138572914	1.0,1.0,1.0	0.916,0.814,0.915	0.118	0.000507803		1715	ENSG00000164548.10	TRA2A	RI	chr7	-	23521706-23521840:23521840-23522120:23522120-23522432	0.402,0.276,0.369	0.785,0.649,0.676	-0.354	1.10363e-06
4336	ENSG00000183604.14	SMG1P5	A3SS	chr16	-	30277596-30277793:30277263-30277428:30277263-30277386	1.0,0.921,1.0	1.0,0.835,0.741	0.115	0.0238697		4141	ENSG00000141294.9	LRRC46	RI	chr17	+	47834424-47834533:47834533-47835352:47835352-47835399	0.133,1.0,0.188	1.0,0.458,1.0	-0.379	0.0189227
9781	ENSG00000187741.14	FANCA	A3SS	chr16	-	89815876-89815986:89810928-89811071:89810928-89811057	1.0,1.0,1.0	1.0,1.0,0.673	0.109	0.0414862		1979	ENSG00000185513.16	L3MBTL1	RI	chr20	+	43515008-43515159:43515159-43516092:43516092-43516177	0.713,0.121,1.0	1.0,1.0,1.0	-0.389	0.00729312
224	ENSG00000205593.11	DENND6B	A3SS	chr22	-	50317292-50317373:50316565-50316712:50316565-50316626	1.0,1.0,0.864	1.0,0.642,0.899	0.108	0.0191991		3740	ENSG00000110811.19	P3H3	RI	chr12	+	6833591-6833644:6833644-6833924:6833924-6834049	0.343,0.656,0.378	0.829,1.0,0.758	-0.403	0.002345
888	ENSG00000156831.7	NSMCE2	A3SS	chr8	+	125094467-125094533:125102013-125102146:125102050-125102146	0.815,1.0,1.0	0.839,1.0,0.655	0.107	0.0376288		2400	ENSG00000139372.14	TDG	RI	chr12	+	103982798-103982934:103982934-103983294:103983294-103983389	1.0,0.204,0.506	1.0,1.0,1.0	-0.43	0.000304221
3758	ENSG00000214193.10	SH3D21	A3SS	chr1	+	36320914-36320978:36321055-36321778:36321723-36321778	1.0,1.0,1.0	1.0,0.748,0.933	0.106	0.021418		1414	ENSG00000065357.19	DGKA	RI	chr12	+	55951622-55951783:55951783-55952340:55952340-55952431	1.0,0.095,0.0	1.0,1.0,0.388	-0.431	0.000407747
												861	ENSG00000204525.16	HLA-C	RI	chr6	-	31269492-31269543:31269543-31269965:31269965-31270085	0.61,1.0,0.0	1.0,1.0,1.0	-0.463	0.0233562
												2987	ENSG00000168566.12	SNRNP48	RI	chr6	+	7599672-7599680:7599680-7601335:7601335-7601524	0.282,0.165,0.358	1.0,0.383,0.817	-0.465	0.0415643
												5196	ENSG00000165959.11	CLMN	RI	chr14	-	95193848-95193919:95193919-95194214:95194214-95194596	0.402,0.101,1.0	1.0,1.0,1.0	-0.499	0.000832272
												5814	ENSG00000278053.4	DDX52	RI	chr17	-	37619767-37619839:37619839-37621126:37621126-37621277	0.293,0.206,0.454	0.483,1.0,1.0	-0.51	0.000932437
												3097	ENSG00000114859.15	CLCN2	RI	chr3	-	184354903-184354973:184354973-184355693:184355693-184357094	0.231,0.205,1.0	1.0,1.0,1.0	-0.521	0.000595482
												3942	ENSG00000177943.13	MAMDC4	RI	chr9	+	136857978-136858097:136858097-136858399:136858399-136858546	0.062,0.398,0.355	0.748,0.665,1.0	-0.533	0.00129843
												902	ENSG00000102886.14	GDPD3	RI	chr16	-	30112657-30112793:30112793-30113021:30113021-30113064	0.165,0.0,0.0	0.664,0.542,0.703	-0.581	3.02977e-05
												3713	ENSG00000125089.16	SH3TC1	RI	chr4	+	8235432-8235555:8235555-8237473:8237473-8237670	0.0,1.0,0.0	1.0,1.0,1.0	-0.667	8.04316e-07
												4679	ENSG00000151490.13	PTPRO	RI	chr12	+	15594936-15595057:15595057-15596089:15596089-15597399	1.0,0.0,0.0	1.0,1.0,1.0	-0.667	7.65123e-05
												3486	ENSG00000100867.14	DHRS2	RI	chr14	+	23639793-23639895:23639895-23641665:23641665-23643219	0.189,0.189,0.0	1.0,1.0,1.0	-0.874	2.6976e-06
												5215	ENSG00000187961.13	KLHL17	MXE	chr1	+	962726-962917:963031-963253:963336-963504:963919-964008	0.161,0.201,0.125	0.311,0.196,0.287	-0.102	0.0420955
												11539	ENSG00000149294.16	NCAM1	MXE	chr11	+	113214368-113214511:113221295-113221325:113231195-113231273:113231644-113231795	0.943,0.858,0.772	1.0,0.889,1.0	-0.105	0.044115
												1133	ENSG00000154710.17	RABGEF1	MXE	chr7	+	66712166-66712224:66739995-66740792:66771882-66772078:66775226-66775393	0.648,0.671,0.627	0.752,0.772,0.741	-0.106	0.00296289
												2102	ENSG00000070814.19	TCOF1	MXE	chr5	+	150379531-150379732:150389886-150390023:150391543-150391657:150391956-150392176	0.324,0.318,0.297	0.437,0.365,0.485	-0.116	0.0239326
												10249	ENSG00000077463.14	SIRT6	MXE	chr19	-	4175027-4175937:4177078-4177138:4179103-4179286:4182473-4182530	0.315,0.294,0.319	0.429,0.408,0.448	-0.119	0.0188357
												10414	ENSG00000107731.12	UNC5B	MXE	chr10	+	71288567-71288732:71288957-71288990:71290914-71291109:71291431-71291821	0.0,0.106,0.0	0.166,0.13,0.166	-0.119	0.0413362
												15143	ENSG00000151498.11	ACAD8	MXE	chr11	+	134256547-134256648:134258514-134258624:134259007-134259084:134259607-134259745	0.06,0.057,0.022	0.195,0.117,0.194	-0.122	0.026696
												5074	ENSG00000136715.18	SAP130	MXE	chr2	-	128016388-128016547:128017679-128017915:128026180-128026298:128027939-128028120	0.427,0.361,0.427	0.534,0.511,0.549	-0.126	0.00818661
												10310	ENSG00000150712.10	MTMR12	MXE	chr5	-	32270816-32270947:32271832-32271905:32273979-32274122:32312757-32312987	0.14,0.037,0.044	0.148,0.208,0.265	-0.133	0.0188357
												11476	ENSG00000149212.11	SESN3	MXE	chr11	-	95184419-95184594:95185255-95185492:95189778-95189961:95191403-95191601	0.33,0.343,0.279	0.475,0.462,0.438	-0.141	0.0387016
												3892	ENSG00000076685.18	NT5C2	MXE	chr10	-	103105705-103105801:103139405-103139479:103174857-103174982:103193235-103193272	0.919,1.0,0.49	1.0,1.0,0.867	-0.153	0.0372005
												9669	ENSG00000197467.14	COL13A1	MXE	chr10	+	69822368-69822438:69867797-69867805:69887455-69887491:69888303-69888330	0.0,0.0,0.153	0.144,0.261,0.243	-0.165	0.030646
												1725	ENSG00000076641.4	PAG1	MXE	chr8	-	80993102-80993307:81029995-81030089:81070111-81070170:81111590-81112068	0.0,0.0,0.369	0.206,0.467,0.2	-0.168	0.0455967
												14169	ENSG00000100376.11	FAM118A	MXE	chr22	+	45323174-45323427:45327841-45328063:45330602-45330731:45332424-45332710	0.498,0.579,0.437	0.635,0.659,0.75	-0.177	0.0379012
												9670	ENSG00000197467.14	COL13A1	MXE	chr10	+	69822368-69822438:69867797-69867805:69887456-69887491:69888303-69888330	0.0,0.0,0.153	0.163,0.281,0.242	-0.178	0.0270725
												9738	ENSG00000148019.13	CEP78	MXE	chr9	+	78253231-78253277:78254835-78254964:78262906-78262984:78264149-78264316	0.477,0.467,0.482	0.615,0.648,0.706	-0.181	0.00672677
												10884	ENSG00000105983.20	LMBR1	MXE	chr7	-	156796388-156796492:156826604-156826744:156833752-156833792:156836812-156836885	0.419,0.436,0.39	0.618,0.575,0.612	-0.187	0.00342964
												15060	ENSG00000081026.18	MAGI3	MXE	chr1	+	113390748-113391349:113549514-113549631:113580541-113580661:113585386-113585596	0.29,0.177,0.246	0.53,0.396,0.375	-0.196	0.0220546
												6387	ENSG00000166352.15	C11orf74	MXE	chr11	+	36594512-36594641:36610080-36610239:36648015-36648155:36659018-36659062	0.247,0.242,0.211	0.54,0.385,0.408	-0.211	0.0188357
												3862	ENSG00000030582.17	GRN	MXE	chr17	+	44345301-44345334:44345530-44345605:44346088-44346228:44349157-44349302	0.674,0.652,0.563	0.841,0.795,0.919	-0.222	0.0144555
												11346	ENSG00000137497.17	NUMA1	MXE	chr11	-	72035901-72035975:72050661-72050833:72068078-72068231:72069841-72069911	0.68,0.761,0.776	1.0,0.91,1.0	-0.231	0.00883257
												15522	ENSG00000088367.21	EPB41L1	MXE	chr20	+	36212271-36212376:36214359-36214440:36218875-36218962:36221863-36221944	0.0,0.0,0.191	0.255,0.477,0.191	-0.244	0.0418759
												14492	ENSG00000129646.14	QRICH2	MXE	chr17	-	76287799-76287897:76289991-76290077:76291014-76294021:76304414-76304525	0.617,0.714,0.668	1.0,0.775,1.0	-0.259	0.0212895
												15518	ENSG00000088367.21	EPB41L1	MXE	chr20	+	36112425-36112480:36121659-36121816:36173763-36173954:36175550-36175715	0.0,0.0,0.0	0.11,0.526,0.25	-0.295	0.00328796
												2195	ENSG00000167460.15	TPM4	MXE	chr19	+	16077020-16077130:16077956-16078149:16080914-16081075:16081912-16082046	0.214,0.076,0.0	0.393,0.405,0.405	-0.304	0.0469796
												73	ENSG00000101901.11	ALG13	MXE	chrX	+	111684964-111685103:111689086-111689197:111708964-111709048:111711674-111711725	0.0,0.0,0.0	0.23,0.642,0.113	-0.328	0.00527133
												10625	ENSG00000156398.12	SFXN2	MXE	chr10	+	102714635-102714681:102715222-102715328:102716233-102716329:102726611-102726797	0.325,0.579,0.706	1.0,0.658,1.0	-0.349	0.00622434
												2970	ENSG00000203797.9	DDO	MXE	chr6	-	110404773-110404950:110408333-110408442:110413290-110413466:110415466-110415562	0.498,0.254,0.417	0.585,0.843,0.799	-0.353	0.0315482
												8058	ENSG00000175224.16	ATG13	MXE	chr11	+	46630044-46630100:46630896-46630991:46632322-46632459:46644278-46644360	0.143,0.0,0.0	0.351,0.0,0.866	-0.358	0.0105071
												12438	ENSG00000175198.16	PCCA	MXE	chr13	+	100330560-100330671:100340156-100340259:100368471-100368574:100425632-100425731	0.364,0.294,0.308	0.625,0.636,0.8	-0.365	0.045123
												9863	ENSG00000230601.6	TEX48	MXE	chr9	-	114666433-114666746:114668205-114668337:114671719-114671827:114682034-114682066	0.0,0.215,0.353	0.605,0.522,0.686	-0.415	0.0300185
												2600	ENSG00000108021.20	FAM208B	MXE	chr10	+	5684947-5685175:5712822-5712918:5714134-5714207:5720543-5720668	0.377,0.731,0.644	1.0,1.0,1.0	-0.416	0.000237981
												11954	ENSG00000092841.18	MYL6	MXE	chr12	+	56158356-56158404:56158683-56158711:56159586-56159622:56160024-56160148	0.059,0.825,0.049	0.702,0.862,0.715	-0.449	0.0349284
												14686	ENSG00000123106.10	CCDC91	MXE	chr12	+	28225794-28225861:28226139-28226199:28255580-28255662:28257201-28257245	0.0,0.121,0.24	0.356,0.648,0.734	-0.459	0.0105071
												30	ENSG00000089820.15	ARHGAP4	MXE	chrX	-	153910699-153910834:153910921-153910999:153911128-153911189:153912699-153912802	0.0,0.0,0.0	0.393,0.351,0.654	-0.466	2.69132e-05
												1786	ENSG00000204305.13	AGER	MXE	chr6	-	32181350-32181477:32181605-32181632:32182246-32182388:32182567-32182698	0.377,0.377,0.377	0.869,0.673,1.0	-0.47	0.0495419
												3284	ENSG00000132122.11	SPATA6	MXE	chr1	-	48411463-48411588:48413109-48413151:48451551-48451600:48452993-48453131	0.659,0.391,0.194	0.897,0.771,1.0	-0.475	0.0300185
												10655	ENSG00000151090.18	THRB	MXE	chr3	-	24228937-24229001:24297225-24297323:24318357-24318494:24337299-24337371	0.302,1.0,0.11	0.838,1.0,1.0	-0.475	0.00805646
												14105	ENSG00000142494.13	SLC47A1	MXE	chr17	+	19547984-19548133:19549634-19549677:19571477-19571572:19572779-19572861	0.0,0.0,0.0	0.353,0.22,0.91	-0.494	0.000130949
												8112	ENSG00000131373.14	HACL1	MXE	chr3	-	15582876-15582989:15589539-15589612:15591599-15591680:15601089-15601194	0.491,0.0,0.0	0.491,0.659,1.0	-0.553	0.0300185
												9792	ENSG00000204681.10	GABBR1	MXE	chr6	-	29627485-29627646:29629086-29629107:29630457-29630643:29631395-29631599	0.337,0.337,0.64	1.0,1.0,1.0	-0.562	0.000135949
												2340	ENSG00000127990.17	SGCE	MXE	chr7	-	94618757-94618956:94621848-94621995:94622545-94622626:94623324-94623397	0.825,0.3,0.0	1.0,0.865,1.0	-0.58	0.0379012
												12059	ENSG00000135679.23	MDM2	MXE	chr12	+	68813553-68813628:68814602-68814689:68815627-68815720:68816811-68816945	0.255,0.435,0.204	1.0,1.0,0.755	-0.62	0.000237981
												12127	ENSG00000236404.9	VLDLR-AS1	MXE	chr9	-	2425396-2425540:2493074-2493180:2493239-2493425:2494179-2494302	0.0,0.0,0.0	0.432,1.0,0.432	-0.621	0.000558989
												9534	ENSG00000164619.9	BMPER	MXE	chr7	+	34058058-34058163:34062001-34062047:34078984-34079186:34085755-34086092	0.0,0.0,0.474	1.0,0.419,1.0	-0.648	0.00488357
												13337	ENSG00000247828.7	TMEM161B-AS1	MXE	chr5	+	88269023-88269119:88270525-88270585:88282041-88282106:88287435-88287622	1.0,0.0,0.0	1.0,1.0,1.0	-0.667	0.0115174
												2970	ENSG00000137955.15	RABGGTB	A5SS	chr1	+	75789158-75790517:75789158-75789356:75791284-75791337	0.876,0.896,0.81	0.882,1.0,1.0	-0.1	0.0456327
												6434	ENSG00000221926.12	TRIM16	A5SS	chr17	-	15682853-15682951:15682860-15682951:15680864-15680953	0.887,0.827,0.937	0.961,1.0,1.0	-0.103	0.00631854
												4400	ENSG00000090013.10	BLVRB	A5SS	chr19	-	40458173-40458545:40458380-40458545:40451363-40451492	0.87,0.814,0.906	1.0,0.901,1.0	-0.104	0.0236651
												6667	ENSG00000171298.12	GAA	A5SS	chr17	+	80101810-80101925:80101810-80101890:80104554-80105132	0.095,0.052,0.024	0.146,0.079,0.298	-0.117	0.0145742
												3062	ENSG00000115486.11	GGCX	A5SS	chr2	-	85558916-85559075:85558945-85559075:85558439-85558662	0.883,0.979,0.747	1.0,0.982,1.0	-0.124	0.0002841
												6015	ENSG00000140474.13	ULK3	A5SS	chr15	-	74840233-74840641:74840497-74840641:74839267-74839373	1.0,0.743,0.883	1.0,1.0,1.0	-0.125	0.0111497
												1052	ENSG00000174720.15	LARP7	A5SS	chr4	+	112644667-112644768:112644667-112644699:112646350-112646451	1.0,0.732,0.834	1.0,1.0,0.969	-0.134	0.00239816
												2213	ENSG00000116353.15	MECR	A5SS	chr1	-	29220833-29220921:29220837-29220921:29216587-29216685	0.059,0.0,0.036	0.109,0.036,0.385	-0.145	0.0341862
												3821	ENSG00000033867.16	SLC4A7	A5SS	chr3	-	27484066-27484347:27484078-27484347:27452416-27452498	0.122,0.052,0.151	0.357,0.222,0.203	-0.152	0.00818905
												769	ENSG00000214087.8	ARL16	A5SS	chr17	-	81682442-81682675:81682490-81682675:81682033-81682149	0.296,0.325,0.237	0.463,0.454,0.431	-0.163	0.0182907
												2330	ENSG00000204120.14	GIGYF2	A5SS	chr2	+	232731121-232731258:232731121-232731234:232735154-232735238	0.0,0.463,0.0	0.633,0.0,0.33	-0.167	0.0145742
												2003	ENSG00000239382.10	ALKBH6	A5SS	chr19	-	36013000-36013089:36013020-36013089:36010893-36011065	0.793,0.702,1.0	1.0,1.0,1.0	-0.168	0.00402457
												4522	ENSG00000163848.19	ZNF148	A5SS	chr3	-	125323308-125323444:125323387-125323444:125313307-125313656	0.69,0.94,0.742	0.951,0.93,1.0	-0.17	0.015447
												798	ENSG00000112715.21	VEGFA	A5SS	chr6	+	43780731-43780803:43780731-43780785:43781955-43782087	0.721,0.768,0.796	0.965,0.935,0.899	-0.171	0.00791275
												3797	ENSG00000105700.10	KXD1	A5SS	chr19	+	18557761-18557949:18557761-18557914:18560419-18560550	0.0,0.0,0.0	0.316,0.213,0.0	-0.176	0.0193414
												2166	ENSG00000224078.13	SNHG14	A5SS	chr15	+	25103858-25106294:25103858-25103970:25107471-25107588	1.0,0.434,1.0	1.0,1.0,1.0	-0.189	0.0375425
												3899	ENSG00000086730.16	LAT2	A5SS	chr7	+	74214821-74215010:74214821-74214940:74215946-74216069	0.803,1.0,0.63	1.0,1.0,1.0	-0.189	0.00261253
												5333	ENSG00000139546.10	TARBP2	A5SS	chr12	+	53503026-53503212:53503026-53503129:53503729-53503808	0.483,0.419,0.508	0.692,0.676,0.625	-0.194	0.0258981
												5866	ENSG00000160087.20	UBE2J2	A5SS	chr1	-	1267732-1267992:1267861-1267992:1266097-1266290	0.637,0.63,0.697	0.885,0.932,0.737	-0.197	0.0111497
												7097	ENSG00000101294.17	HM13	A5SS	chr20	+	31538178-31538554:31538178-31538359:31544946-31545035	0.796,0.776,0.565	1.0,1.0,0.752	-0.205	0.0234506
												6081	ENSG00000100983.10	GSS	A5SS	chr20	-	34942487-34943006:34942930-34943006:34936942-34937023	1.0,0.442,0.863	1.0,0.934,1.0	-0.21	0.00780784
												6069	ENSG00000112874.9	NUDT12	A5SS	chr5	-	103560042-103560254:103560096-103560254:103558878-103559468	0.869,0.449,0.933	1.0,0.946,0.965	-0.22	0.00604976
												5317	ENSG00000139631.18	CSAD	A5SS	chr12	-	53171176-53171441:53171325-53171441:53170422-53170502	0.0,0.0,0.0	0.217,0.36,0.13	-0.236	0.000393225
												2822	ENSG00000078053.16	AMPH	A5SS	chr7	-	38427837-38429285:38429055-38429285:38426953-38426986	0.141,0.098,0.064	0.298,0.353,0.375	-0.241	0.00290596
												3999	ENSG00000175455.14	CCDC14	A5SS	chr3	-	123955842-123956115:123956045-123956115:123948895-123949132	0.624,0.659,0.713	0.809,1.0,0.94	-0.251	0.00181891
												4574	ENSG00000198246.8	SLC29A3	A5SS	chr10	+	71319281-71319731:71319281-71319310:71322755-71323054	0.0,0.0,0.0	0.343,0.13,0.282	-0.252	0.00502834
												5329	ENSG00000197111.15	PCBP2	A5SS	chr12	+	53460330-53460686:53460330-53460425:53461014-53461143	0.577,0.82,0.725	0.934,1.0,1.0	-0.271	0.00105842
												3047	ENSG00000154134.14	ROBO3	A5SS	chr11	+	124877518-124878131:124877518-124877658:124878297-124878436	0.193,0.489,1.0	0.545,1.0,1.0	-0.288	0.0172462
												4272	ENSG00000198561.13	CTNND1	A5SS	chr11	+	57761796-57762119:57761796-57762068:57789036-57789155	0.804,0.848,0.46	1.0,1.0,1.0	-0.296	0.000393225
												6912	ENSG00000196268.11	ZNF493	A5SS	chr19	+	21397132-21397422:21397132-21397267:21405128-21405255	0.0,0.0,0.329	0.329,0.662,0.246	-0.303	0.0142392
												3733	ENSG00000135678.11	CPM	A5SS	chr12	-	68933141-68933202:68933159-68933202:68932677-68932840	0.527,1.0,0.527	1.0,1.0,1.0	-0.315	0.0021476
												6086	ENSG00000167733.13	HSD11B1L	A5SS	chr19	+	5684818-5685119:5684818-5684905:5687281-5687375	0.221,0.451,1.0	1.0,1.0,0.672	-0.333	0.014391
												4777	ENSG00000105717.13	PBX4	A5SS	chr19	-	19570098-19570299:19570108-19570299:19569448-19569584	0.172,0.0,0.0	0.319,0.385,0.539	-0.357	0.00143827
												435	ENSG00000169129.14	AFAP1L2	A5SS	chr10	-	114297219-114297413:114297231-114297413:114296977-114297100	0.911,0.316,0.581	1.0,1.0,1.0	-0.397	0.00331726
												3542	ENSG00000197905.8	TEAD4	A5SS	chr12	+	2959947-2960353:2959947-2960196:3011003-3011068	1.0,0.661,0.0	1.0,1.0,1.0	-0.446	0.0352262
												6006	ENSG00000144535.19	DIS3L2	A5SS	chr2	+	232130618-232130943:232130618-232130719:232163458-232163632	0.706,0.706,0.048	0.815,1.0,1.0	-0.452	0.00118017
												799	ENSG00000112715.21	VEGFA	A5SS	chr6	+	43780731-43780854:43780731-43780785:43781955-43782087	0.291,0.281,0.0	0.804,0.578,0.578	-0.463	0.0235812
												1087	ENSG00000148498.15	PARD3	A5SS	chr10	-	34347955-34348115:34347964-34348115:34346197-34346449	0.485,0.095,0.239	1.0,0.654,0.654	-0.496	0.0376797
												3855	ENSG00000168385.17	SEPT2	A5SS	chr2	+	241316421-241316555:241316421-241316540:241324215-241324241	0.476,0.872,0.0	1.0,1.0,1.0	-0.551	0.000393225
												4471	ENSG00000118961.14	LDAH	A5SS	chr2	-	20801291-20801465:20801309-20801465:20774809-20774979	0.229,0.182,0.472	1.0,1.0,0.69	-0.602	0.000393225
												7880	ENSG00000111801.15	BTN3A3	A3SS	chr6	+	26440471-26440648:26443366-26443442:26443381-26443442	0.0,0.0,0.0	0.302,0.0,0.0	-0.101	0.0334899
												3876	ENSG00000102048.15	ASB9	A3SS	chrX	-	15252253-15252404:15250429-15250564:15250429-15250534	0.794,0.941,0.926	1.0,0.97,1.0	-0.103	0.000738152
												7374	ENSG00000109911.18	ELP4	A3SS	chr11	+	31594769-31594901:31603764-31603907:31603767-31603907	0.152,0.12,0.089	0.212,0.3,0.167	-0.106	0.0294853
												8741	ENSG00000100938.17	GMPR2	A3SS	chr14	+	24233478-24233598:24234106-24234241:24234112-24234241	0.766,1.0,0.803	1.0,0.896,1.0	-0.109	0.0329232
												11010	ENSG00000100991.11	TRPC4AP	A3SS	chr20	-	35035122-35035308:35021189-35021356:35021189-35021332	0.713,0.696,0.695	0.808,0.808,0.823	-0.112	8.15148e-05
												2814	ENSG00000143198.12	MGST3	A3SS	chr1	+	165632239-165632274:165649754-165649964:165649840-165649964	0.937,0.927,0.757	1.0,0.98,0.979	-0.113	0.00203664
												2661	ENSG00000142102.15	PGGHG	A3SS	chr11	+	290389-290600:290657-291113:290677-291113	0.0,0.15,0.0	0.089,0.407,0.0	-0.115	0.0432925
												6724	ENSG00000167384.10	ZNF180	A3SS	chr19	-	44500197-44500522:44497283-44497377:44497283-44497372	0.897,1.0,0.659	1.0,0.906,1.0	-0.117	0.0408882
												5981	ENSG00000061918.12	GUCY1B1	A3SS	chr4	+	155799876-155800074:155802212-155802579:155802341-155802579	0.0,0.0,0.0	0.085,0.089,0.211	-0.128	0.0125437
												7962	ENSG00000139178.10	C1RL	A3SS	chr12	-	7099900-7100026:7099685-7099807:7099685-7099760	0.0,0.087,0.0	0.147,0.142,0.194	-0.132	0.000778248
												4080	ENSG00000178904.18	DPY19L3	A3SS	chr19	+	32464727-32464784:32467473-32468813:32468730-32468813	0.09,0.117,0.096	0.271,0.274,0.168	-0.137	0.0334899
												6541	ENSG00000099330.8	OCEL1	A3SS	chr19	+	17228255-17228309:17228802-17229219:17229008-17229219	0.501,0.484,0.452	0.6,0.624,0.673	-0.153	0.00610878
												4698	ENSG00000205531.12	NAP1L4	A3SS	chr11	-	2992228-2992258:2989128-2989271:2989128-2989197	0.903,0.893,0.728	1.0,1.0,1.0	-0.159	0.00345424
												9163	ENSG00000129197.14	RPAIN	A3SS	chr17	+	5422768-5422829:5425970-5428211:5428070-5428211	0.744,0.819,0.585	0.874,0.952,0.826	-0.168	0.0244245
												5997	ENSG00000161013.16	MGAT4B	A3SS	chr5	-	179799505-179799636:179798927-179799175:179798927-179799121	0.813,0.647,0.783	0.958,0.89,0.905	-0.17	0.00611251
												7780	ENSG00000137760.14	ALKBH8	A3SS	chr11	-	107556765-107557003:107553846-107553978:107553846-107553973	1.0,0.892,0.592	1.0,1.0,1.0	-0.172	0.0144408
												10657	ENSG00000167491.17	GATAD2A	A3SS	chr19	+	19457111-19457229:19465339-19465614:19465344-19465614	0.804,0.842,0.645	0.813,1.0,1.0	-0.174	0.0044575
												4610	ENSG00000196369.11	SRGAP2B	A3SS	chr1	-	144914691-144914754:144905858-144906074:144905858-144906039	0.84,0.581,0.924	1.0,0.903,1.0	-0.186	0.0213556
												9417	ENSG00000213918.10	DNASE1	A3SS	chr16	+	3656637-3656753:3656998-3657341:3657186-3657341	0.793,0.78,0.857	1.0,1.0,1.0	-0.19	0.00160867
												9435	ENSG00000170471.14	RALGAPB	A3SS	chr20	+	38532729-38532859:38535073-38535207:38535085-38535207	0.693,0.618,0.706	0.856,0.93,0.889	-0.219	4.41562e-05
												3359	ENSG00000143353.11	LYPLAL1	A3SS	chr1	+	219179146-219179246:219210514-219210647:219210531-219210647	0.0,0.183,0.0	0.264,0.23,0.391	-0.234	0.00532634
												3407	ENSG00000169231.13	THBS3	A3SS	chr1	-	155202260-155202401:155201956-155202114:155201956-155202034	0.0,0.148,0.0	0.42,0.245,0.258	-0.258	0.000509818
												4612	ENSG00000204628.11	RACK1	A3SS	chr5	-	181241491-181241639:181240215-181240345:181240215-181240327	0.555,0.435,0.391	0.7,0.843,0.634	-0.265	0.0423352
												769	ENSG00000147421.17	HMBOX1	A3SS	chr8	+	29047357-29047453:29048953-29049048:29048956-29049048	0.662,0.635,0.595	0.927,0.855,0.922	-0.271	0.00245848
												2725	ENSG00000225855.6	RUSC1-AS1	A3SS	chr1	-	155321624-155321695:155319802-155319953:155319802-155319932	1.0,0.0,0.0	1.0,0.637,0.226	-0.288	0.0195666
												162	ENSG00000215301.10	DDX3X	A3SS	chrX	+	41337407-41337465:41337690-41339083:41339038-41339083	0.488,0.455,0.394	0.772,0.607,0.83	-0.291	0.034694
												7715	ENSG00000184939.15	ZFP90	A3SS	chr16	+	68557997-68558124:68558374-68558568:68558472-68558568	0.0,0.07,0.0	0.161,0.446,0.335	-0.291	0.000205609
												5954	ENSG00000227124.9	ZNF717	A3SS	chr3	-	75783305-75783364:75741609-75741865:75741609-75741736	0.0,0.0,0.0	0.682,0.0,0.211	-0.298	0.0472447
												745	ENSG00000229212.8	AC044860.1	A3SS	chr15	-	85208774-85208929:85207467-85207618:85207467-85207605	0.216,0.551,0.479	0.479,0.866,0.821	-0.307	0.0376288
												2914	ENSG00000186111.9	PIP5K1C	A3SS	chr19	-	3638883-3639016:3636600-3638006:3636600-3637613	0.641,1.0,0.423	1.0,1.0,1.0	-0.312	0.0484215
												10049	ENSG00000006125.17	AP2B1	A3SS	chr17	+	35598229-35598335:35600936-35601071:35600985-35601071	0.0,1.0,0.751	0.693,1.0,1.0	-0.314	0.0149407
												4944	ENSG00000050748.17	MAPK9	A3SS	chr5	-	180239923-180239987:180233593-180236531:180233593-180236526	0.0,0.492,0.0	0.0,0.446,1.0	-0.318	0.0198092
												8425	ENSG00000111011.17	RSRC2	A3SS	chr12	-	122520503-122520581:122518838-122519051:122518838-122519029	0.511,0.395,0.599	0.807,0.832,0.85	-0.328	0.00724446
												7769	ENSG00000101639.18	CEP192	A3SS	chr18	+	13055779-13056698:13057584-13059312:13059081-13059312	0.541,1.0,0.469	1.0,1.0,1.0	-0.33	0.000813858
												2430	ENSG00000168255.20	POLR2J3	A3SS	chr7	-	102544705-102544776:102543524-102543697:102543524-102543661	1.0,0.0,0.0	0.0,1.0,1.0	-0.333	0.000515406
												1907	ENSG00000280081.3	LINC01667	A3SS	chr21	-	9808173-9808361:9807734-9807974:9807734-9807820	0.0,0.0,1.0	1.0,0.496,0.534	-0.343	0.0334899
												706	ENSG00000164733.20	CTSB	A3SS	chr8	-	11868000-11868089:11867253-11867526:11867253-11867391	0.567,0.743,0.647	1.0,1.0,1.0	-0.348	0.00789248
												7185	ENSG00000159348.12	CYB5R1	A3SS	chr1	-	202966748-202966898:202965886-202966109:202965886-202965993	0.508,0.567,0.861	1.0,1.0,1.0	-0.355	8.15148e-05
												3329	ENSG00000171680.21	PLEKHG5	A3SS	chr1	-	6469041-6469241:6467824-6467898:6467824-6467893	0.492,0.659,0.721	1.0,1.0,1.0	-0.376	0.00200406
												6602	ENSG00000204681.10	GABBR1	A3SS	chr6	-	29631395-29631599:29629086-29629247:29629086-29629107	0.673,0.407,0.77	1.0,1.0,1.0	-0.383	0.00694859
												2969	ENSG00000239382.10	ALKBH6	A3SS	chr19	-	36013020-36013089:36010893-36011077:36010893-36011065	0.382,0.435,1.0	1.0,1.0,1.0	-0.394	0.00103972
												2998	ENSG00000117407.16	ARTN	A3SS	chr1	+	43935589-43935716:43936068-43936231:43936092-43936231	0.0,0.535,0.073	1.0,0.0,0.838	-0.41	0.030405
												6371	ENSG00000125089.16	SH3TC1	A3SS	chr4	+	8235432-8235555:8236277-8237670:8237473-8237670	0.181,1.0,0.499	1.0,1.0,1.0	-0.44	0.0389444
												8307	ENSG00000173598.13	NUDT4	A3SS	chr12	+	93394608-93394719:93398767-93398855:93398770-93398855	0.329,0.551,0.495	1.0,0.723,1.0	-0.449	0.0389444
												9122	ENSG00000185880.12	TRIM69	A3SS	chr15	+	44756367-44756463:44758612-44758854:44758620-44758854	1.0,0.275,0.0	1.0,1.0,1.0	-0.575	0.00977849
												8582	ENSG00000048342.15	CC2D2A	A3SS	chr4	+	15478722-15478806:15479218-15479328:15479222-15479328	0.0,1.0,0.0	1.0,1.0,1.0	-0.667	0.000104616
												5286	ENSG00000213471.10	TTLL13P	A3SS	chr15	+	90262965-90263145:90263739-90264058:90263946-90264058	0.386,0.0,0.456	1.0,1.0,1.0	-0.719	0.00143484
												5287	ENSG00000213471.10	TTLL13P	A3SS	chr15	+	90262965-90263145:90263754-90264058:90263946-90264058	0.304,0.0,0.466	1.0,1.0,1.0	-0.743	0.000843385
												10962	ENSG00000173253.15	DMRT2	A3SS	chr9	+	1053721-1053824:1055721-1057552:1056215-1057552	0.188,0.0,0.0	0.481,1.0,1.0	-0.764	0.000205718

## Sheet: Overlap CLIP
	AS event											CLIP
direction	event.id	gene.id	gene.symbol	event.type	chr	strand	event.coords	inc.levels.KD	inc.levels.control	deltaPSI	FDR	chr	peak.start	peak.end
KD SERBP1	5367	ENSG00000136717.14	BIN1	MXE	chr2	-	127051153-127051243:127052254-127052362:127053904-127054012:127057472-127057601	1.0,1.0,1.0	1.0,0.0,0.0	0.667	0.00353	chr2	127052173	127052174
KD SERBP1	5367	ENSG00000136717.14	BIN1	MXE	chr2	-	127051153-127051243:127052254-127052362:127053904-127054012:127057472-127057601	1.0,1.0,1.0	1.0,0.0,0.0	0.667	0.00353	chr2	127052179	127052180
KD SERBP1	1216	ENSG00000149346.14	SLX4IP	MXE	chr20	+	10458175-10458231:10556230-10556320:10560699-10560820:10598674-10598752	0.693,1.0,0.798	0.361,0.0,0.361	0.59	0.0115174	chr20	10560680	10560681
KD SERBP1	1216	ENSG00000149346.14	SLX4IP	MXE	chr20	+	10458175-10458231:10556230-10556320:10560699-10560820:10598674-10598752	0.693,1.0,0.798	0.361,0.0,0.361	0.59	0.0115174	chr20	10560744	10560745
KD SERBP1	96231	ENSG00000108846.15	ABCC3	SE	chr17	+	50634813-50634981:50656701-50656827:50658434-50658496	0.153,0.394,0.448	1.0,1.0,0.765	0.59	0.000554295	chr17	50656642	50656643
KD SERBP1	96231	ENSG00000108846.15	ABCC3	SE	chr17	+	50634813-50634981:50656701-50656827:50658434-50658496	0.153,0.394,0.448	1.0,1.0,0.765	0.59	0.000554295	chr17	50656715	50656716
KD SERBP1	96231	ENSG00000108846.15	ABCC3	SE	chr17	+	50634813-50634981:50656701-50656827:50658434-50658496	0.153,0.394,0.448	1.0,1.0,0.765	0.59	0.000554295	chr17	50656742	50656743
KD SERBP1	96231	ENSG00000108846.15	ABCC3	SE	chr17	+	50634813-50634981:50656701-50656827:50658434-50658496	0.153,0.394,0.448	1.0,1.0,0.765	0.59	0.000554295	chr17	50656744	50656745
KD SERBP1	96231	ENSG00000108846.15	ABCC3	SE	chr17	+	50634813-50634981:50656701-50656827:50658434-50658496	0.153,0.394,0.448	1.0,1.0,0.765	0.59	0.000554295	chr17	50656789	50656790
KD SERBP1	96231	ENSG00000108846.15	ABCC3	SE	chr17	+	50634813-50634981:50656701-50656827:50658434-50658496	0.153,0.394,0.448	1.0,1.0,0.765	0.59	0.000554295	chr17	50656794	50656795
KD SERBP1	96231	ENSG00000108846.15	ABCC3	SE	chr17	+	50634813-50634981:50656701-50656827:50658434-50658496	0.153,0.394,0.448	1.0,1.0,0.765	0.59	0.000554295	chr17	50656797	50656798
KD SERBP1	96231	ENSG00000108846.15	ABCC3	SE	chr17	+	50634813-50634981:50656701-50656827:50658434-50658496	0.153,0.394,0.448	1.0,1.0,0.765	0.59	0.000554295	chr17	50656812	50656813
KD SERBP1	96231	ENSG00000108846.15	ABCC3	SE	chr17	+	50634813-50634981:50656701-50656827:50658434-50658496	0.153,0.394,0.448	1.0,1.0,0.765	0.59	0.000554295	chr17	50656818	50656819
KD SERBP1	96231	ENSG00000108846.15	ABCC3	SE	chr17	+	50634813-50634981:50656701-50656827:50658434-50658496	0.153,0.394,0.448	1.0,1.0,0.765	0.59	0.000554295	chr17	50656821	50656822
KD SERBP1	96231	ENSG00000108846.15	ABCC3	SE	chr17	+	50634813-50634981:50656701-50656827:50658434-50658496	0.153,0.394,0.448	1.0,1.0,0.765	0.59	0.000554295	chr17	50656827	50656828
KD SERBP1	96231	ENSG00000108846.15	ABCC3	SE	chr17	+	50634813-50634981:50656701-50656827:50658434-50658496	0.153,0.394,0.448	1.0,1.0,0.765	0.59	0.000554295	chr17	50656831	50656832
KD SERBP1	96231	ENSG00000108846.15	ABCC3	SE	chr17	+	50634813-50634981:50656701-50656827:50658434-50658496	0.153,0.394,0.448	1.0,1.0,0.765	0.59	0.000554295	chr17	50656832	50656833
KD SERBP1	96231	ENSG00000108846.15	ABCC3	SE	chr17	+	50634813-50634981:50656701-50656827:50658434-50658496	0.153,0.394,0.448	1.0,1.0,0.765	0.59	0.000554295	chr17	50656840	50656841
KD SERBP1	96231	ENSG00000108846.15	ABCC3	SE	chr17	+	50634813-50634981:50656701-50656827:50658434-50658496	0.153,0.394,0.448	1.0,1.0,0.765	0.59	0.000554295	chr17	50656846	50656847
KD SERBP1	96231	ENSG00000108846.15	ABCC3	SE	chr17	+	50634813-50634981:50656701-50656827:50658434-50658496	0.153,0.394,0.448	1.0,1.0,0.765	0.59	0.000554295	chr17	50656852	50656853
KD SERBP1	96231	ENSG00000108846.15	ABCC3	SE	chr17	+	50634813-50634981:50656701-50656827:50658434-50658496	0.153,0.394,0.448	1.0,1.0,0.765	0.59	0.000554295	chr17	50656872	50656873
KD SERBP1	96231	ENSG00000108846.15	ABCC3	SE	chr17	+	50634813-50634981:50656701-50656827:50658434-50658496	0.153,0.394,0.448	1.0,1.0,0.765	0.59	0.000554295	chr17	50656880	50656881
KD SERBP1	96231	ENSG00000108846.15	ABCC3	SE	chr17	+	50634813-50634981:50656701-50656827:50658434-50658496	0.153,0.394,0.448	1.0,1.0,0.765	0.59	0.000554295	chr17	50656882	50656883
KD SERBP1	96231	ENSG00000108846.15	ABCC3	SE	chr17	+	50634813-50634981:50656701-50656827:50658434-50658496	0.153,0.394,0.448	1.0,1.0,0.765	0.59	0.000554295	chr17	50656896	50656897
KD SERBP1	96231	ENSG00000108846.15	ABCC3	SE	chr17	+	50634813-50634981:50656701-50656827:50658434-50658496	0.153,0.394,0.448	1.0,1.0,0.765	0.59	0.000554295	chr17	50656901	50656902
KD SERBP1	96231	ENSG00000108846.15	ABCC3	SE	chr17	+	50634813-50634981:50656701-50656827:50658434-50658496	0.153,0.394,0.448	1.0,1.0,0.765	0.59	0.000554295	chr17	50656906	50656907
KD SERBP1	96231	ENSG00000108846.15	ABCC3	SE	chr17	+	50634813-50634981:50656701-50656827:50658434-50658496	0.153,0.394,0.448	1.0,1.0,0.765	0.59	0.000554295	chr17	50656909	50656910
KD SERBP1	96231	ENSG00000108846.15	ABCC3	SE	chr17	+	50634813-50634981:50656701-50656827:50658434-50658496	0.153,0.394,0.448	1.0,1.0,0.765	0.59	0.000554295	chr17	50656915	50656916
KD SERBP1	96231	ENSG00000108846.15	ABCC3	SE	chr17	+	50634813-50634981:50656701-50656827:50658434-50658496	0.153,0.394,0.448	1.0,1.0,0.765	0.59	0.000554295	chr17	50656922	50656923
KD SERBP1	96231	ENSG00000108846.15	ABCC3	SE	chr17	+	50634813-50634981:50656701-50656827:50658434-50658496	0.153,0.394,0.448	1.0,1.0,0.765	0.59	0.000554295	chr17	50656923	50656924
KD SERBP1	96231	ENSG00000108846.15	ABCC3	SE	chr17	+	50634813-50634981:50656701-50656827:50658434-50658496	0.153,0.394,0.448	1.0,1.0,0.765	0.59	0.000554295	chr17	50656926	50656927
KD SERBP1	98897	ENSG00000104881.15	PPP1R13L	SE	chr19	-	45396337-45396436:45398004-45398147:45406291-45406309	0.0,0.0,1.0	1.0,0.754,1.0	0.585	0.000413317	chr19	45398008	45398009
KD SERBP1	98897	ENSG00000104881.15	PPP1R13L	SE	chr19	-	45396337-45396436:45398004-45398147:45406291-45406309	0.0,0.0,1.0	1.0,0.754,1.0	0.585	0.000413317	chr19	45398108	45398109
KD SERBP1	67622	ENSG00000165996.13	HACD1	SE	chr10	-	17594204-17594383:17603559-17603648:17603929-17604047	0.334,0.0,0.0	0.653,1.0,0.385	0.568	0.0183262	chr10	17603474	17603475
KD SERBP1	67622	ENSG00000165996.13	HACD1	SE	chr10	-	17594204-17594383:17603559-17603648:17603929-17604047	0.334,0.0,0.0	0.653,1.0,0.385	0.568	0.0183262	chr10	17603689	17603690
KD SERBP1	102180	ENSG00000182986.13	ZNF320	SE	chr19	-	52891228-52891346:52893383-52893619:52897647-52897693	0.608,0.162,0.537	1.0,1.0,1.0	0.564	0.000853006	chr19	52893424	52893425
KD SERBP1	102180	ENSG00000182986.13	ZNF320	SE	chr19	-	52891228-52891346:52893383-52893619:52897647-52897693	0.608,0.162,0.537	1.0,1.0,1.0	0.564	0.000853006	chr19	52893556	52893557
KD SERBP1	102180	ENSG00000182986.13	ZNF320	SE	chr19	-	52891228-52891346:52893383-52893619:52897647-52897693	0.608,0.162,0.537	1.0,1.0,1.0	0.564	0.000853006	chr19	52893580	52893581
KD SERBP1	16644	ENSG00000077782.20	FGFR1	SE	chr8	-	38421796-38421941:38423024-38423175:38427920-38428093	0.0,0.199,0.153	0.332,0.713,1.0	0.564	0.014003	chr8	38422933	38422934
KD SERBP1	16644	ENSG00000077782.20	FGFR1	SE	chr8	-	38421796-38421941:38423024-38423175:38427920-38428093	0.0,0.199,0.153	0.332,0.713,1.0	0.564	0.014003	chr8	38422946	38422947
KD SERBP1	16644	ENSG00000077782.20	FGFR1	SE	chr8	-	38421796-38421941:38423024-38423175:38427920-38428093	0.0,0.199,0.153	0.332,0.713,1.0	0.564	0.014003	chr8	38423167	38423168
KD SERBP1	23710	ENSG00000174669.11	SLC29A2	SE	chr11	-	66368536-66368671:66369059-66369131:66369368-66369532	0.403,0.574,0.0	1.0,0.669,1.0	0.564	0.0402332	chr11	66369063	66369064
KD SERBP1	23710	ENSG00000174669.11	SLC29A2	SE	chr11	-	66368536-66368671:66369059-66369131:66369368-66369532	0.403,0.574,0.0	1.0,0.669,1.0	0.564	0.0402332	chr11	66369097	66369098
KD SERBP1	23710	ENSG00000174669.11	SLC29A2	SE	chr11	-	66368536-66368671:66369059-66369131:66369368-66369532	0.403,0.574,0.0	1.0,0.669,1.0	0.564	0.0402332	chr11	66369113	66369114
KD SERBP1	23710	ENSG00000174669.11	SLC29A2	SE	chr11	-	66368536-66368671:66369059-66369131:66369368-66369532	0.403,0.574,0.0	1.0,0.669,1.0	0.564	0.0402332	chr11	66369120	66369121
KD SERBP1	23710	ENSG00000174669.11	SLC29A2	SE	chr11	-	66368536-66368671:66369059-66369131:66369368-66369532	0.403,0.574,0.0	1.0,0.669,1.0	0.564	0.0402332	chr11	66369124	66369125
KD SERBP1	23710	ENSG00000174669.11	SLC29A2	SE	chr11	-	66368536-66368671:66369059-66369131:66369368-66369532	0.403,0.574,0.0	1.0,0.669,1.0	0.564	0.0402332	chr11	66369141	66369142
KD SERBP1	23710	ENSG00000174669.11	SLC29A2	SE	chr11	-	66368536-66368671:66369059-66369131:66369368-66369532	0.403,0.574,0.0	1.0,0.669,1.0	0.564	0.0402332	chr11	66369145	66369146
KD SERBP1	65066	ENSG00000204681.10	GABBR1	SE	chr6	-	29629086-29629107:29630521-29630643:29631395-29631599	0.524,0.268,0.579	1.0,1.0,1.0	0.543	0.000729754	chr6	29630426	29630427
KD SERBP1	65066	ENSG00000204681.10	GABBR1	SE	chr6	-	29629086-29629107:29630521-29630643:29631395-29631599	0.524,0.268,0.579	1.0,1.0,1.0	0.543	0.000729754	chr6	29630436	29630437
KD SERBP1	65066	ENSG00000204681.10	GABBR1	SE	chr6	-	29629086-29629107:29630521-29630643:29631395-29631599	0.524,0.268,0.579	1.0,1.0,1.0	0.543	0.000729754	chr6	29630502	29630503
KD SERBP1	65066	ENSG00000204681.10	GABBR1	SE	chr6	-	29629086-29629107:29630521-29630643:29631395-29631599	0.524,0.268,0.579	1.0,1.0,1.0	0.543	0.000729754	chr6	29630529	29630530
KD SERBP1	65066	ENSG00000204681.10	GABBR1	SE	chr6	-	29629086-29629107:29630521-29630643:29631395-29631599	0.524,0.268,0.579	1.0,1.0,1.0	0.543	0.000729754	chr6	29630561	29630562
KD SERBP1	65066	ENSG00000204681.10	GABBR1	SE	chr6	-	29629086-29629107:29630521-29630643:29631395-29631599	0.524,0.268,0.579	1.0,1.0,1.0	0.543	0.000729754	chr6	29630564	29630565
KD SERBP1	65066	ENSG00000204681.10	GABBR1	SE	chr6	-	29629086-29629107:29630521-29630643:29631395-29631599	0.524,0.268,0.579	1.0,1.0,1.0	0.543	0.000729754	chr6	29630621	29630622
KD SERBP1	65066	ENSG00000204681.10	GABBR1	SE	chr6	-	29629086-29629107:29630521-29630643:29631395-29631599	0.524,0.268,0.579	1.0,1.0,1.0	0.543	0.000729754	chr6	29630667	29630668
KD SERBP1	65066	ENSG00000204681.10	GABBR1	SE	chr6	-	29629086-29629107:29630521-29630643:29631395-29631599	0.524,0.268,0.579	1.0,1.0,1.0	0.543	0.000729754	chr6	29630677	29630678
KD SERBP1	3634	ENSG00000166619.13	BLCAP	A3SS	chr20	-	37527792-37527878:37521318-37521451:37521318-37521409	1.0,0.811,1.0	0.0,0.438,0.757	0.539	0.0376042	chr20	37521329	37521330
KD SERBP1	3634	ENSG00000166619.13	BLCAP	A3SS	chr20	-	37527792-37527878:37521318-37521451:37521318-37521409	1.0,0.811,1.0	0.0,0.438,0.757	0.539	0.0376042	chr20	37521480	37521481
KD SERBP1	25736	ENSG00000132780.16	NASP	SE	chr1	+	45591222-45591270:45613168-45613248:45614292-45614366	0.394,0.303,0.394	1.0,1.0,0.661	0.523	0.0013618	chr1	45613105	45613106
KD SERBP1	25736	ENSG00000132780.16	NASP	SE	chr1	+	45591222-45591270:45613168-45613248:45614292-45614366	0.394,0.303,0.394	1.0,1.0,0.661	0.523	0.0013618	chr1	45613159	45613160
KD SERBP1	25736	ENSG00000132780.16	NASP	SE	chr1	+	45591222-45591270:45613168-45613248:45614292-45614366	0.394,0.303,0.394	1.0,1.0,0.661	0.523	0.0013618	chr1	45613193	45613194
KD SERBP1	25736	ENSG00000132780.16	NASP	SE	chr1	+	45591222-45591270:45613168-45613248:45614292-45614366	0.394,0.303,0.394	1.0,1.0,0.661	0.523	0.0013618	chr1	45613218	45613219
KD SERBP1	25736	ENSG00000132780.16	NASP	SE	chr1	+	45591222-45591270:45613168-45613248:45614292-45614366	0.394,0.303,0.394	1.0,1.0,0.661	0.523	0.0013618	chr1	45613222	45613223
KD SERBP1	25736	ENSG00000132780.16	NASP	SE	chr1	+	45591222-45591270:45613168-45613248:45614292-45614366	0.394,0.303,0.394	1.0,1.0,0.661	0.523	0.0013618	chr1	45613225	45613226
KD SERBP1	25736	ENSG00000132780.16	NASP	SE	chr1	+	45591222-45591270:45613168-45613248:45614292-45614366	0.394,0.303,0.394	1.0,1.0,0.661	0.523	0.0013618	chr1	45613236	45613237
KD SERBP1	25736	ENSG00000132780.16	NASP	SE	chr1	+	45591222-45591270:45613168-45613248:45614292-45614366	0.394,0.303,0.394	1.0,1.0,0.661	0.523	0.0013618	chr1	45613240	45613241
KD SERBP1	25736	ENSG00000132780.16	NASP	SE	chr1	+	45591222-45591270:45613168-45613248:45614292-45614366	0.394,0.303,0.394	1.0,1.0,0.661	0.523	0.0013618	chr1	45613241	45613242
KD SERBP1	90053	ENSG00000135018.13	UBQLN1	SE	chr9	-	83666349-83669327:83682950-83683066:83707499-83707934	0.123,0.0,1.0	1.0,0.628,1.0	0.502	0.00168457	chr9	83683004	83683005
KD SERBP1	90053	ENSG00000135018.13	UBQLN1	SE	chr9	-	83666349-83669327:83682950-83683066:83707499-83707934	0.123,0.0,1.0	1.0,0.628,1.0	0.502	0.00168457	chr9	83683024	83683025
KD SERBP1	6689	ENSG00000183010.16	PYCR1	A5SS	chr17	-	81937179-81937239:81937192-81937239:81936747-81936861	1.0,0.535,1.0	0.116,0.763,0.155	0.5	0.0264583	chr17	81937145	81937146
KD SERBP1	6689	ENSG00000183010.16	PYCR1	A5SS	chr17	-	81937179-81937239:81937192-81937239:81936747-81936861	1.0,0.535,1.0	0.116,0.763,0.155	0.5	0.0264583	chr17	81937211	81937212
KD SERBP1	6689	ENSG00000183010.16	PYCR1	A5SS	chr17	-	81937179-81937239:81937192-81937239:81936747-81936861	1.0,0.535,1.0	0.116,0.763,0.155	0.5	0.0264583	chr17	81937232	81937233
KD SERBP1	6689	ENSG00000183010.16	PYCR1	A5SS	chr17	-	81937179-81937239:81937192-81937239:81936747-81936861	1.0,0.535,1.0	0.116,0.763,0.155	0.5	0.0264583	chr17	81937233	81937234
KD SERBP1	65064	ENSG00000204681.10	GABBR1	SE	chr6	-	29629086-29629107:29630457-29630643:29631395-29631599	0.572,0.308,0.64	1.0,1.0,1.0	0.493	0.00129798	chr6	29630412	29630413
KD SERBP1	65064	ENSG00000204681.10	GABBR1	SE	chr6	-	29629086-29629107:29630457-29630643:29631395-29631599	0.572,0.308,0.64	1.0,1.0,1.0	0.493	0.00129798	chr6	29630418	29630419
KD SERBP1	65064	ENSG00000204681.10	GABBR1	SE	chr6	-	29629086-29629107:29630457-29630643:29631395-29631599	0.572,0.308,0.64	1.0,1.0,1.0	0.493	0.00129798	chr6	29630426	29630427
KD SERBP1	65064	ENSG00000204681.10	GABBR1	SE	chr6	-	29629086-29629107:29630457-29630643:29631395-29631599	0.572,0.308,0.64	1.0,1.0,1.0	0.493	0.00129798	chr6	29630436	29630437
KD SERBP1	65064	ENSG00000204681.10	GABBR1	SE	chr6	-	29629086-29629107:29630457-29630643:29631395-29631599	0.572,0.308,0.64	1.0,1.0,1.0	0.493	0.00129798	chr6	29630502	29630503
KD SERBP1	65064	ENSG00000204681.10	GABBR1	SE	chr6	-	29629086-29629107:29630457-29630643:29631395-29631599	0.572,0.308,0.64	1.0,1.0,1.0	0.493	0.00129798	chr6	29630529	29630530
KD SERBP1	65064	ENSG00000204681.10	GABBR1	SE	chr6	-	29629086-29629107:29630457-29630643:29631395-29631599	0.572,0.308,0.64	1.0,1.0,1.0	0.493	0.00129798	chr6	29630561	29630562
KD SERBP1	65064	ENSG00000204681.10	GABBR1	SE	chr6	-	29629086-29629107:29630457-29630643:29631395-29631599	0.572,0.308,0.64	1.0,1.0,1.0	0.493	0.00129798	chr6	29630564	29630565
KD SERBP1	65064	ENSG00000204681.10	GABBR1	SE	chr6	-	29629086-29629107:29630457-29630643:29631395-29631599	0.572,0.308,0.64	1.0,1.0,1.0	0.493	0.00129798	chr6	29630621	29630622
KD SERBP1	65064	ENSG00000204681.10	GABBR1	SE	chr6	-	29629086-29629107:29630457-29630643:29631395-29631599	0.572,0.308,0.64	1.0,1.0,1.0	0.493	0.00129798	chr6	29630667	29630668
KD SERBP1	65064	ENSG00000204681.10	GABBR1	SE	chr6	-	29629086-29629107:29630457-29630643:29631395-29631599	0.572,0.308,0.64	1.0,1.0,1.0	0.493	0.00129798	chr6	29630677	29630678
KD SERBP1	61312	ENSG00000131507.10	NDFIP1	SE	chr5	+	142132211-142132342:142137733-142137858:142144570-142144676	0.12,1.0,0.405	1.0,1.0,1.0	0.492	0.000665257	chr5	142137747	142137748
KD SERBP1	61312	ENSG00000131507.10	NDFIP1	SE	chr5	+	142132211-142132342:142137733-142137858:142144570-142144676	0.12,1.0,0.405	1.0,1.0,1.0	0.492	0.000665257	chr5	142137801	142137802
KD SERBP1	61312	ENSG00000131507.10	NDFIP1	SE	chr5	+	142132211-142132342:142137733-142137858:142144570-142144676	0.12,1.0,0.405	1.0,1.0,1.0	0.492	0.000665257	chr5	142137808	142137809
KD SERBP1	10945	ENSG00000103042.8	SLC38A7	MXE	chr16	-	58670112-58670167:58672095-58672243:58675939-58676121:58683954-58684110	1.0,1.0,1.0	0.915,0.264,0.35	0.49	0.000372809	chr16	58672028	58672029
KD SERBP1	10945	ENSG00000103042.8	SLC38A7	MXE	chr16	-	58670112-58670167:58672095-58672243:58675939-58676121:58683954-58684110	1.0,1.0,1.0	0.915,0.264,0.35	0.49	0.000372809	chr16	58676075	58676076
KD SERBP1	10945	ENSG00000103042.8	SLC38A7	MXE	chr16	-	58670112-58670167:58672095-58672243:58675939-58676121:58683954-58684110	1.0,1.0,1.0	0.915,0.264,0.35	0.49	0.000372809	chr16	58676217	58676218
KD SERBP1	5603	ENSG00000132604.10	TERF2	RI	chr16	-	69368375-69368482:69368482-69368586:69368586-69368595	0.841,0.764,0.836	0.522,0.164,0.306	0.483	0.000258362	chr16	69368391	69368392
KD SERBP1	5603	ENSG00000132604.10	TERF2	RI	chr16	-	69368375-69368482:69368482-69368586:69368586-69368595	0.841,0.764,0.836	0.522,0.164,0.306	0.483	0.000258362	chr16	69368403	69368404
KD SERBP1	5603	ENSG00000132604.10	TERF2	RI	chr16	-	69368375-69368482:69368482-69368586:69368586-69368595	0.841,0.764,0.836	0.522,0.164,0.306	0.483	0.000258362	chr16	69368453	69368454
KD SERBP1	5603	ENSG00000132604.10	TERF2	RI	chr16	-	69368375-69368482:69368482-69368586:69368586-69368595	0.841,0.764,0.836	0.522,0.164,0.306	0.483	0.000258362	chr16	69368467	69368468
KD SERBP1	10346	ENSG00000205885.7	C1RL-AS1	A3SS	chr12	+	7110297-7110572:7111024-7111606:7111370-7111606	1.0,1.0,1.0	0.644,0.601,0.311	0.481	0.0145462	chr12	7111110	7111111
KD SERBP1	10346	ENSG00000205885.7	C1RL-AS1	A3SS	chr12	+	7110297-7110572:7111024-7111606:7111370-7111606	1.0,1.0,1.0	0.644,0.601,0.311	0.481	0.0145462	chr12	7111150	7111151
KD SERBP1	10346	ENSG00000205885.7	C1RL-AS1	A3SS	chr12	+	7110297-7110572:7111024-7111606:7111370-7111606	1.0,1.0,1.0	0.644,0.601,0.311	0.481	0.0145462	chr12	7111153	7111154
KD SERBP1	10346	ENSG00000205885.7	C1RL-AS1	A3SS	chr12	+	7110297-7110572:7111024-7111606:7111370-7111606	1.0,1.0,1.0	0.644,0.601,0.311	0.481	0.0145462	chr12	7111185	7111186
KD SERBP1	10346	ENSG00000205885.7	C1RL-AS1	A3SS	chr12	+	7110297-7110572:7111024-7111606:7111370-7111606	1.0,1.0,1.0	0.644,0.601,0.311	0.481	0.0145462	chr12	7111201	7111202
KD SERBP1	10346	ENSG00000205885.7	C1RL-AS1	A3SS	chr12	+	7110297-7110572:7111024-7111606:7111370-7111606	1.0,1.0,1.0	0.644,0.601,0.311	0.481	0.0145462	chr12	7111202	7111203
KD SERBP1	10346	ENSG00000205885.7	C1RL-AS1	A3SS	chr12	+	7110297-7110572:7111024-7111606:7111370-7111606	1.0,1.0,1.0	0.644,0.601,0.311	0.481	0.0145462	chr12	7111248	7111249
KD SERBP1	10346	ENSG00000205885.7	C1RL-AS1	A3SS	chr12	+	7110297-7110572:7111024-7111606:7111370-7111606	1.0,1.0,1.0	0.644,0.601,0.311	0.481	0.0145462	chr12	7111254	7111255
KD SERBP1	10346	ENSG00000205885.7	C1RL-AS1	A3SS	chr12	+	7110297-7110572:7111024-7111606:7111370-7111606	1.0,1.0,1.0	0.644,0.601,0.311	0.481	0.0145462	chr12	7111284	7111285
KD SERBP1	10346	ENSG00000205885.7	C1RL-AS1	A3SS	chr12	+	7110297-7110572:7111024-7111606:7111370-7111606	1.0,1.0,1.0	0.644,0.601,0.311	0.481	0.0145462	chr12	7111315	7111316
KD SERBP1	10346	ENSG00000205885.7	C1RL-AS1	A3SS	chr12	+	7110297-7110572:7111024-7111606:7111370-7111606	1.0,1.0,1.0	0.644,0.601,0.311	0.481	0.0145462	chr12	7111320	7111321
KD SERBP1	10346	ENSG00000205885.7	C1RL-AS1	A3SS	chr12	+	7110297-7110572:7111024-7111606:7111370-7111606	1.0,1.0,1.0	0.644,0.601,0.311	0.481	0.0145462	chr12	7111441	7111442
KD SERBP1	10346	ENSG00000205885.7	C1RL-AS1	A3SS	chr12	+	7110297-7110572:7111024-7111606:7111370-7111606	1.0,1.0,1.0	0.644,0.601,0.311	0.481	0.0145462	chr12	7111442	7111443
KD SERBP1	15871	ENSG00000064692.18	SNCAIP	SE	chr5	+	122403792-122403865:122422867-122423739:122431968-122432082	0.422,0.154,1.0	1.0,1.0,1.0	0.475	0.0135134	chr5	122423308	122423309
KD SERBP1	15871	ENSG00000064692.18	SNCAIP	SE	chr5	+	122403792-122403865:122422867-122423739:122431968-122432082	0.422,0.154,1.0	1.0,1.0,1.0	0.475	0.0135134	chr5	122423514	122423515
KD SERBP1	15871	ENSG00000064692.18	SNCAIP	SE	chr5	+	122403792-122403865:122422867-122423739:122431968-122432082	0.422,0.154,1.0	1.0,1.0,1.0	0.475	0.0135134	chr5	122423535	122423536
KD SERBP1	15871	ENSG00000064692.18	SNCAIP	SE	chr5	+	122403792-122403865:122422867-122423739:122431968-122432082	0.422,0.154,1.0	1.0,1.0,1.0	0.475	0.0135134	chr5	122423699	122423700
KD SERBP1	5044	ENSG00000111237.18	VPS29	A5SS	chr12	-	110499456-110499546:110499534-110499546:110496822-110497002	0.783,0.396,1.0	0.0,0.396,0.396	0.462	0.00143827	chr12	110499548	110499549
KD SERBP1	5044	ENSG00000111237.18	VPS29	A5SS	chr12	-	110499456-110499546:110499534-110499546:110496822-110497002	0.783,0.396,1.0	0.0,0.396,0.396	0.462	0.00143827	chr12	110499594	110499595
KD SERBP1	103111	ENSG00000100997.18	ABHD12	SE	chr20	-	25309445-25309575:25320198-25320318:25339226-25339351	1.0,0.156,0.156	1.0,0.689,1.0	0.459	0.00206219	chr20	25320210	25320211
KD SERBP1	103111	ENSG00000100997.18	ABHD12	SE	chr20	-	25309445-25309575:25320198-25320318:25339226-25339351	1.0,0.156,0.156	1.0,0.689,1.0	0.459	0.00206219	chr20	25320330	25320331
KD SERBP1	55910	ENSG00000114354.13	TFG	SE	chr3	+	100709969-100710295:100710970-100711068:100713642-100713869	0.547,0.0,0.335	0.707,0.547,1.0	0.457	0.0256262	chr3	100711011	100711012
KD SERBP1	55910	ENSG00000114354.13	TFG	SE	chr3	+	100709969-100710295:100710970-100711068:100713642-100713869	0.547,0.0,0.335	0.707,0.547,1.0	0.457	0.0256262	chr3	100711101	100711102
KD SERBP1	101747	ENSG00000215769.8	ARHGAP27P1-BPTFP1-KPNA2P3	SE	chr17	-	64749662-64750008:64750593-64750723:64751806-64751956	1.0,0.0,0.0	0.348,1.0,1.0	0.449	0.0232372	chr17	64750634	64750635
KD SERBP1	101747	ENSG00000215769.8	ARHGAP27P1-BPTFP1-KPNA2P3	SE	chr17	-	64749662-64750008:64750593-64750723:64751806-64751956	1.0,0.0,0.0	0.348,1.0,1.0	0.449	0.0232372	chr17	64750682	64750683
KD SERBP1	4948	ENSG00000130653.15	PNPLA7	RI	chr9	-	137464125-137464195:137464195-137464339:137464339-137464456	1.0,1.0,0.504	0.203,0.0,1.0	0.434	5.59335e-05	chr9	137464157	137464158
KD SERBP1	4948	ENSG00000130653.15	PNPLA7	RI	chr9	-	137464125-137464195:137464195-137464339:137464339-137464456	1.0,1.0,0.504	0.203,0.0,1.0	0.434	5.59335e-05	chr9	137464304	137464305
KD SERBP1	4948	ENSG00000130653.15	PNPLA7	RI	chr9	-	137464125-137464195:137464195-137464339:137464339-137464456	1.0,1.0,0.504	0.203,0.0,1.0	0.434	5.59335e-05	chr9	137464347	137464348
KD SERBP1	4948	ENSG00000130653.15	PNPLA7	RI	chr9	-	137464125-137464195:137464195-137464339:137464339-137464456	1.0,1.0,0.504	0.203,0.0,1.0	0.434	5.59335e-05	chr9	137464350	137464351
KD SERBP1	4948	ENSG00000130653.15	PNPLA7	RI	chr9	-	137464125-137464195:137464195-137464339:137464339-137464456	1.0,1.0,0.504	0.203,0.0,1.0	0.434	5.59335e-05	chr9	137464361	137464362
KD SERBP1	4948	ENSG00000130653.15	PNPLA7	RI	chr9	-	137464125-137464195:137464195-137464339:137464339-137464456	1.0,1.0,0.504	0.203,0.0,1.0	0.434	5.59335e-05	chr9	137464371	137464372
KD SERBP1	4948	ENSG00000130653.15	PNPLA7	RI	chr9	-	137464125-137464195:137464195-137464339:137464339-137464456	1.0,1.0,0.504	0.203,0.0,1.0	0.434	5.59335e-05	chr9	137464408	137464409
KD SERBP1	5444	ENSG00000162004.16	CCDC78	RI	chr16	-	722921-723161:723161-723856:723856-723936	0.514,1.0,1.0	0.6,0.402,0.227	0.428	0.0118933	chr16	723086	723087
KD SERBP1	5444	ENSG00000162004.16	CCDC78	RI	chr16	-	722921-723161:723161-723856:723856-723936	0.514,1.0,1.0	0.6,0.402,0.227	0.428	0.0118933	chr16	723181	723182
KD SERBP1	5444	ENSG00000162004.16	CCDC78	RI	chr16	-	722921-723161:723161-723856:723856-723936	0.514,1.0,1.0	0.6,0.402,0.227	0.428	0.0118933	chr16	723675	723676
KD SERBP1	5444	ENSG00000162004.16	CCDC78	RI	chr16	-	722921-723161:723161-723856:723856-723936	0.514,1.0,1.0	0.6,0.402,0.227	0.428	0.0118933	chr16	723719	723720
KD SERBP1	5444	ENSG00000162004.16	CCDC78	RI	chr16	-	722921-723161:723161-723856:723856-723936	0.514,1.0,1.0	0.6,0.402,0.227	0.428	0.0118933	chr16	723883	723884
KD SERBP1	75003	ENSG00000137497.17	NUMA1	SE	chr11	-	72050661-72050833:72068104-72068231:72069841-72070063	0.598,0.351,0.778	1.0,1.0,1.0	0.424	0.00267331	chr11	72068198	72068199
KD SERBP1	75003	ENSG00000137497.17	NUMA1	SE	chr11	-	72050661-72050833:72068104-72068231:72069841-72070063	0.598,0.351,0.778	1.0,1.0,1.0	0.424	0.00267331	chr11	72068199	72068200
KD SERBP1	75003	ENSG00000137497.17	NUMA1	SE	chr11	-	72050661-72050833:72068104-72068231:72069841-72070063	0.598,0.351,0.778	1.0,1.0,1.0	0.424	0.00267331	chr11	72068322	72068323
KD SERBP1	67074	ENSG00000127314.17	RAP1B	SE	chr12	+	68610907-68611052:68624674-68624873:68641037-68641153	0.658,0.461,0.461	1.0,0.811,1.0	0.41	0.000416323	chr12	68624686	68624687
KD SERBP1	67074	ENSG00000127314.17	RAP1B	SE	chr12	+	68610907-68611052:68624674-68624873:68641037-68641153	0.658,0.461,0.461	1.0,0.811,1.0	0.41	0.000416323	chr12	68624713	68624714
KD SERBP1	67074	ENSG00000127314.17	RAP1B	SE	chr12	+	68610907-68611052:68624674-68624873:68641037-68641153	0.658,0.461,0.461	1.0,0.811,1.0	0.41	0.000416323	chr12	68624851	68624852
KD SERBP1	13934	ENSG00000263020.6	AL662899.2	SE	chr6	+	31669117-31669172:31670972-31671008:31671155-31671284	0.212,0.0,0.0	0.349,0.287,0.801	0.408	0.00562446	chr6	31670949	31670950
KD SERBP1	13934	ENSG00000263020.6	AL662899.2	SE	chr6	+	31669117-31669172:31670972-31671008:31671155-31671284	0.212,0.0,0.0	0.349,0.287,0.801	0.408	0.00562446	chr6	31670965	31670966
KD SERBP1	13934	ENSG00000263020.6	AL662899.2	SE	chr6	+	31669117-31669172:31670972-31671008:31671155-31671284	0.212,0.0,0.0	0.349,0.287,0.801	0.408	0.00562446	chr6	31671019	31671020
KD SERBP1	13934	ENSG00000263020.6	AL662899.2	SE	chr6	+	31669117-31669172:31670972-31671008:31671155-31671284	0.212,0.0,0.0	0.349,0.287,0.801	0.408	0.00562446	chr6	31671043	31671044
KD SERBP1	72218	ENSG00000246273.7	SBF2-AS1	SE	chr11	+	9775730-9775765:9780375-9780575:9807847-9808038	0.146,0.631,0.316	0.847,0.587,0.872	0.404	0.0257057	chr11	9780407	9780408
KD SERBP1	72218	ENSG00000246273.7	SBF2-AS1	SE	chr11	+	9775730-9775765:9780375-9780575:9807847-9808038	0.146,0.631,0.316	0.847,0.587,0.872	0.404	0.0257057	chr11	9780412	9780413
KD SERBP1	72218	ENSG00000246273.7	SBF2-AS1	SE	chr11	+	9775730-9775765:9780375-9780575:9807847-9808038	0.146,0.631,0.316	0.847,0.587,0.872	0.404	0.0257057	chr11	9780430	9780431
KD SERBP1	72218	ENSG00000246273.7	SBF2-AS1	SE	chr11	+	9775730-9775765:9780375-9780575:9807847-9808038	0.146,0.631,0.316	0.847,0.587,0.872	0.404	0.0257057	chr11	9780434	9780435
KD SERBP1	1212	ENSG00000173230.15	GOLGB1	A5SS	chr3	-	121669196-121669355:121669211-121669355:121668060-121668158	0.522,0.82,0.476	0.062,0.312,0.24	0.401	0.0237073	chr3	121669121	121669122
KD SERBP1	1212	ENSG00000173230.15	GOLGB1	A5SS	chr3	-	121669196-121669355:121669211-121669355:121668060-121668158	0.522,0.82,0.476	0.062,0.312,0.24	0.401	0.0237073	chr3	121669226	121669227
KD SERBP1	1212	ENSG00000173230.15	GOLGB1	A5SS	chr3	-	121669196-121669355:121669211-121669355:121668060-121668158	0.522,0.82,0.476	0.062,0.312,0.24	0.401	0.0237073	chr3	121669241	121669242
KD SERBP1	84278	ENSG00000196497.16	IPO4	SE	chr14	-	24181512-24181617:24182277-24182423:24182791-24182842	0.431,0.574,0.431	0.639,1.0,1.0	0.401	0.0467008	chr14	24182352	24182353
KD SERBP1	84278	ENSG00000196497.16	IPO4	SE	chr14	-	24181512-24181617:24182277-24182423:24182791-24182842	0.431,0.574,0.431	0.639,1.0,1.0	0.401	0.0467008	chr14	24182372	24182373
KD SERBP1	84278	ENSG00000196497.16	IPO4	SE	chr14	-	24181512-24181617:24182277-24182423:24182791-24182842	0.431,0.574,0.431	0.639,1.0,1.0	0.401	0.0467008	chr14	24182481	24182482
KD SERBP1	13392	ENSG00000172765.17	TMCC1	SE	chr3	-	129848345-129848412:129860939-129861012:129893493-129893606	1.0,0.402,0.0	0.573,1.0,1.0	0.39	0.0410003	chr3	129860974	129860975
KD SERBP1	13392	ENSG00000172765.17	TMCC1	SE	chr3	-	129848345-129848412:129860939-129861012:129893493-129893606	1.0,0.402,0.0	0.573,1.0,1.0	0.39	0.0410003	chr3	129861042	129861043
KD SERBP1	4304	ENSG00000108352.12	RAPGEFL1	A5SS	chr17	+	40181298-40181486:40181298-40181373:40181615-40181694	1.0,1.0,0.862	0.363,0.773,0.556	0.39	0.00278774	chr17	40181305	40181306
KD SERBP1	4304	ENSG00000108352.12	RAPGEFL1	A5SS	chr17	+	40181298-40181486:40181298-40181373:40181615-40181694	1.0,1.0,0.862	0.363,0.773,0.556	0.39	0.00278774	chr17	40181359	40181360
KD SERBP1	4304	ENSG00000108352.12	RAPGEFL1	A5SS	chr17	+	40181298-40181486:40181298-40181373:40181615-40181694	1.0,1.0,0.862	0.363,0.773,0.556	0.39	0.00278774	chr17	40181370	40181371
KD SERBP1	51871	ENSG00000043093.13	DCUN1D1	SE	chr3	-	182963880-182964049:182965678-182965753:182980486-182980520	0.444,0.727,0.571	1.0,0.889,1.0	0.382	0.000833786	chr3	182965580	182965581
KD SERBP1	51871	ENSG00000043093.13	DCUN1D1	SE	chr3	-	182963880-182964049:182965678-182965753:182980486-182980520	0.444,0.727,0.571	1.0,0.889,1.0	0.382	0.000833786	chr3	182965584	182965585
KD SERBP1	51871	ENSG00000043093.13	DCUN1D1	SE	chr3	-	182963880-182964049:182965678-182965753:182980486-182980520	0.444,0.727,0.571	1.0,0.889,1.0	0.382	0.000833786	chr3	182965592	182965593
KD SERBP1	51871	ENSG00000043093.13	DCUN1D1	SE	chr3	-	182963880-182964049:182965678-182965753:182980486-182980520	0.444,0.727,0.571	1.0,0.889,1.0	0.382	0.000833786	chr3	182965605	182965606
KD SERBP1	51871	ENSG00000043093.13	DCUN1D1	SE	chr3	-	182963880-182964049:182965678-182965753:182980486-182980520	0.444,0.727,0.571	1.0,0.889,1.0	0.382	0.000833786	chr3	182965625	182965626
KD SERBP1	51871	ENSG00000043093.13	DCUN1D1	SE	chr3	-	182963880-182964049:182965678-182965753:182980486-182980520	0.444,0.727,0.571	1.0,0.889,1.0	0.382	0.000833786	chr3	182965646	182965647
KD SERBP1	51871	ENSG00000043093.13	DCUN1D1	SE	chr3	-	182963880-182964049:182965678-182965753:182980486-182980520	0.444,0.727,0.571	1.0,0.889,1.0	0.382	0.000833786	chr3	182965718	182965719
KD SERBP1	51871	ENSG00000043093.13	DCUN1D1	SE	chr3	-	182963880-182964049:182965678-182965753:182980486-182980520	0.444,0.727,0.571	1.0,0.889,1.0	0.382	0.000833786	chr3	182965727	182965728
KD SERBP1	51871	ENSG00000043093.13	DCUN1D1	SE	chr3	-	182963880-182964049:182965678-182965753:182980486-182980520	0.444,0.727,0.571	1.0,0.889,1.0	0.382	0.000833786	chr3	182965740	182965741
KD SERBP1	3854	ENSG00000168385.17	SEPT2	A5SS	chr2	+	241316421-241316555:241316421-241316540:241317498-241317599	0.803,0.602,0.342	0.275,0.142,0.199	0.377	0.0263441	chr2	241316451	241316452
KD SERBP1	3854	ENSG00000168385.17	SEPT2	A5SS	chr2	+	241316421-241316555:241316421-241316540:241317498-241317599	0.803,0.602,0.342	0.275,0.142,0.199	0.377	0.0263441	chr2	241316579	241316580
KD SERBP1	4223	ENSG00000179532.12	DNHD1	RI	chr11	+	6547862-6548040:6548040-6548209:6548209-6548402	0.701,1.0,0.789	0.413,0.319,0.64	0.373	0.0080699	chr11	6547947	6547948
KD SERBP1	4223	ENSG00000179532.12	DNHD1	RI	chr11	+	6547862-6548040:6548040-6548209:6548209-6548402	0.701,1.0,0.789	0.413,0.319,0.64	0.373	0.0080699	chr11	6548062	6548063
KD SERBP1	4223	ENSG00000179532.12	DNHD1	RI	chr11	+	6547862-6548040:6548040-6548209:6548209-6548402	0.701,1.0,0.789	0.413,0.319,0.64	0.373	0.0080699	chr11	6548078	6548079
KD SERBP1	4223	ENSG00000179532.12	DNHD1	RI	chr11	+	6547862-6548040:6548040-6548209:6548209-6548402	0.701,1.0,0.789	0.413,0.319,0.64	0.373	0.0080699	chr11	6548175	6548176
KD SERBP1	4223	ENSG00000179532.12	DNHD1	RI	chr11	+	6547862-6548040:6548040-6548209:6548209-6548402	0.701,1.0,0.789	0.413,0.319,0.64	0.373	0.0080699	chr11	6548218	6548219
KD SERBP1	4223	ENSG00000179532.12	DNHD1	RI	chr11	+	6547862-6548040:6548040-6548209:6548209-6548402	0.701,1.0,0.789	0.413,0.319,0.64	0.373	0.0080699	chr11	6548248	6548249
KD SERBP1	71219	ENSG00000125970.11	RALY	SE	chr20	+	34073818-34073866:34076701-34076815:34078504-34078553	1.0,0.221,0.274	1.0,0.586,1.0	0.364	0.0346295	chr20	34076699	34076700
KD SERBP1	71219	ENSG00000125970.11	RALY	SE	chr20	+	34073818-34073866:34076701-34076815:34078504-34078553	1.0,0.221,0.274	1.0,0.586,1.0	0.364	0.0346295	chr20	34076746	34076747
KD SERBP1	71219	ENSG00000125970.11	RALY	SE	chr20	+	34073818-34073866:34076701-34076815:34078504-34078553	1.0,0.221,0.274	1.0,0.586,1.0	0.364	0.0346295	chr20	34076809	34076810
KD SERBP1	10130	ENSG00000270647.5	TAF15	SE	chr17	+	35809454-35809576:35824077-35824198:35834565-35834598	0.734,0.181,1.0	1.0,1.0,1.0	0.362	0.0446525	chr17	35824067	35824068
KD SERBP1	10130	ENSG00000270647.5	TAF15	SE	chr17	+	35809454-35809576:35824077-35824198:35834565-35834598	0.734,0.181,1.0	1.0,1.0,1.0	0.362	0.0446525	chr17	35824079	35824080
KD SERBP1	10130	ENSG00000270647.5	TAF15	SE	chr17	+	35809454-35809576:35824077-35824198:35834565-35834598	0.734,0.181,1.0	1.0,1.0,1.0	0.362	0.0446525	chr17	35824088	35824089
KD SERBP1	10130	ENSG00000270647.5	TAF15	SE	chr17	+	35809454-35809576:35824077-35824198:35834565-35834598	0.734,0.181,1.0	1.0,1.0,1.0	0.362	0.0446525	chr17	35824089	35824090
KD SERBP1	10130	ENSG00000270647.5	TAF15	SE	chr17	+	35809454-35809576:35824077-35824198:35834565-35834598	0.734,0.181,1.0	1.0,1.0,1.0	0.362	0.0446525	chr17	35824090	35824091
KD SERBP1	10130	ENSG00000270647.5	TAF15	SE	chr17	+	35809454-35809576:35824077-35824198:35834565-35834598	0.734,0.181,1.0	1.0,1.0,1.0	0.362	0.0446525	chr17	35824091	35824092
KD SERBP1	10130	ENSG00000270647.5	TAF15	SE	chr17	+	35809454-35809576:35824077-35824198:35834565-35834598	0.734,0.181,1.0	1.0,1.0,1.0	0.362	0.0446525	chr17	35824093	35824094
KD SERBP1	10130	ENSG00000270647.5	TAF15	SE	chr17	+	35809454-35809576:35824077-35824198:35834565-35834598	0.734,0.181,1.0	1.0,1.0,1.0	0.362	0.0446525	chr17	35824100	35824101
KD SERBP1	10130	ENSG00000270647.5	TAF15	SE	chr17	+	35809454-35809576:35824077-35824198:35834565-35834598	0.734,0.181,1.0	1.0,1.0,1.0	0.362	0.0446525	chr17	35824101	35824102
KD SERBP1	10130	ENSG00000270647.5	TAF15	SE	chr17	+	35809454-35809576:35824077-35824198:35834565-35834598	0.734,0.181,1.0	1.0,1.0,1.0	0.362	0.0446525	chr17	35824110	35824111
KD SERBP1	10130	ENSG00000270647.5	TAF15	SE	chr17	+	35809454-35809576:35824077-35824198:35834565-35834598	0.734,0.181,1.0	1.0,1.0,1.0	0.362	0.0446525	chr17	35824121	35824122
KD SERBP1	10130	ENSG00000270647.5	TAF15	SE	chr17	+	35809454-35809576:35824077-35824198:35834565-35834598	0.734,0.181,1.0	1.0,1.0,1.0	0.362	0.0446525	chr17	35824122	35824123
KD SERBP1	10130	ENSG00000270647.5	TAF15	SE	chr17	+	35809454-35809576:35824077-35824198:35834565-35834598	0.734,0.181,1.0	1.0,1.0,1.0	0.362	0.0446525	chr17	35824129	35824130
KD SERBP1	10130	ENSG00000270647.5	TAF15	SE	chr17	+	35809454-35809576:35824077-35824198:35834565-35834598	0.734,0.181,1.0	1.0,1.0,1.0	0.362	0.0446525	chr17	35824130	35824131
KD SERBP1	10130	ENSG00000270647.5	TAF15	SE	chr17	+	35809454-35809576:35824077-35824198:35834565-35834598	0.734,0.181,1.0	1.0,1.0,1.0	0.362	0.0446525	chr17	35824132	35824133
KD SERBP1	10130	ENSG00000270647.5	TAF15	SE	chr17	+	35809454-35809576:35824077-35824198:35834565-35834598	0.734,0.181,1.0	1.0,1.0,1.0	0.362	0.0446525	chr17	35824139	35824140
KD SERBP1	10130	ENSG00000270647.5	TAF15	SE	chr17	+	35809454-35809576:35824077-35824198:35834565-35834598	0.734,0.181,1.0	1.0,1.0,1.0	0.362	0.0446525	chr17	35824140	35824141
KD SERBP1	10130	ENSG00000270647.5	TAF15	SE	chr17	+	35809454-35809576:35824077-35824198:35834565-35834598	0.734,0.181,1.0	1.0,1.0,1.0	0.362	0.0446525	chr17	35824145	35824146
KD SERBP1	10130	ENSG00000270647.5	TAF15	SE	chr17	+	35809454-35809576:35824077-35824198:35834565-35834598	0.734,0.181,1.0	1.0,1.0,1.0	0.362	0.0446525	chr17	35824148	35824149
KD SERBP1	10130	ENSG00000270647.5	TAF15	SE	chr17	+	35809454-35809576:35824077-35824198:35834565-35834598	0.734,0.181,1.0	1.0,1.0,1.0	0.362	0.0446525	chr17	35824151	35824152
KD SERBP1	10130	ENSG00000270647.5	TAF15	SE	chr17	+	35809454-35809576:35824077-35824198:35834565-35834598	0.734,0.181,1.0	1.0,1.0,1.0	0.362	0.0446525	chr17	35824182	35824183
KD SERBP1	10130	ENSG00000270647.5	TAF15	SE	chr17	+	35809454-35809576:35824077-35824198:35834565-35834598	0.734,0.181,1.0	1.0,1.0,1.0	0.362	0.0446525	chr17	35824192	35824193
KD SERBP1	10130	ENSG00000270647.5	TAF15	SE	chr17	+	35809454-35809576:35824077-35824198:35834565-35834598	0.734,0.181,1.0	1.0,1.0,1.0	0.362	0.0446525	chr17	35824196	35824197
KD SERBP1	10130	ENSG00000270647.5	TAF15	SE	chr17	+	35809454-35809576:35824077-35824198:35834565-35834598	0.734,0.181,1.0	1.0,1.0,1.0	0.362	0.0446525	chr17	35824226	35824227
KD SERBP1	10130	ENSG00000270647.5	TAF15	SE	chr17	+	35809454-35809576:35824077-35824198:35834565-35834598	0.734,0.181,1.0	1.0,1.0,1.0	0.362	0.0446525	chr17	35824227	35824228
KD SERBP1	85318	ENSG00000117859.18	OSBPL9	SE	chr1	+	51651990-51652041:51669433-51669814:51714002-51714079	0.747,0.529,0.29	1.0,0.797,0.842	0.358	0.0148934	chr1	51669529	51669530
KD SERBP1	85318	ENSG00000117859.18	OSBPL9	SE	chr1	+	51651990-51652041:51669433-51669814:51714002-51714079	0.747,0.529,0.29	1.0,0.797,0.842	0.358	0.0148934	chr1	51669612	51669613
KD SERBP1	30322	ENSG00000160688.18	FLAD1	SE	chr1	+	154983372-154984066:154990158-154990257:154992564-154992673	0.706,0.474,0.231	0.474,1.0,1.0	0.354	0.0248286	chr1	154990163	154990164
KD SERBP1	30322	ENSG00000160688.18	FLAD1	SE	chr1	+	154983372-154984066:154990158-154990257:154992564-154992673	0.706,0.474,0.231	0.474,1.0,1.0	0.354	0.0248286	chr1	154990227	154990228
KD SERBP1	30322	ENSG00000160688.18	FLAD1	SE	chr1	+	154983372-154984066:154990158-154990257:154992564-154992673	0.706,0.474,0.231	0.474,1.0,1.0	0.354	0.0248286	chr1	154990329	154990330
KD SERBP1	2786	ENSG00000115274.14	INO80B	A3SS	chr2	+	74455108-74455296:74455390-74455598:74455405-74455598	1.0,1.0,1.0	0.405,1.0,0.548	0.349	0.000894349	chr2	74455401	74455402
KD SERBP1	2786	ENSG00000115274.14	INO80B	A3SS	chr2	+	74455108-74455296:74455390-74455598:74455405-74455598	1.0,1.0,1.0	0.405,1.0,0.548	0.349	0.000894349	chr2	74455438	74455439
KD SERBP1	2786	ENSG00000115274.14	INO80B	A3SS	chr2	+	74455108-74455296:74455390-74455598:74455405-74455598	1.0,1.0,1.0	0.405,1.0,0.548	0.349	0.000894349	chr2	74455443	74455444
KD SERBP1	2786	ENSG00000115274.14	INO80B	A3SS	chr2	+	74455108-74455296:74455390-74455598:74455405-74455598	1.0,1.0,1.0	0.405,1.0,0.548	0.349	0.000894349	chr2	74455450	74455451
KD SERBP1	2786	ENSG00000115274.14	INO80B	A3SS	chr2	+	74455108-74455296:74455390-74455598:74455405-74455598	1.0,1.0,1.0	0.405,1.0,0.548	0.349	0.000894349	chr2	74455472	74455473
KD SERBP1	2786	ENSG00000115274.14	INO80B	A3SS	chr2	+	74455108-74455296:74455390-74455598:74455405-74455598	1.0,1.0,1.0	0.405,1.0,0.548	0.349	0.000894349	chr2	74455480	74455481
KD SERBP1	4243	ENSG00000243970.3	PPIEL	RI	chr1	-	39547578-39547634:39547634-39548861:39548861-39548951	1.0,1.0,0.494	1.0,0.413,0.035	0.349	0.0022184	chr1	39547763	39547764
KD SERBP1	4243	ENSG00000243970.3	PPIEL	RI	chr1	-	39547578-39547634:39547634-39548861:39548861-39548951	1.0,1.0,0.494	1.0,0.413,0.035	0.349	0.0022184	chr1	39547965	39547966
KD SERBP1	4243	ENSG00000243970.3	PPIEL	RI	chr1	-	39547578-39547634:39547634-39548861:39548861-39548951	1.0,1.0,0.494	1.0,0.413,0.035	0.349	0.0022184	chr1	39548920	39548921
KD SERBP1	9943	ENSG00000166579.15	NDEL1	A3SS	chr17	+	8436650-8436694:8443926-8444357:8444259-8444357	0.918,0.801,0.832	0.553,0.676,0.279	0.348	0.0294853	chr17	8444236	8444237
KD SERBP1	9943	ENSG00000166579.15	NDEL1	A3SS	chr17	+	8436650-8436694:8443926-8444357:8444259-8444357	0.918,0.801,0.832	0.553,0.676,0.279	0.348	0.0294853	chr17	8444322	8444323
KD SERBP1	5651	ENSG00000197912.15	SPG7	RI	chr16	+	89545871-89546030:89546030-89546657:89546657-89546760	1.0,1.0,0.729	0.434,0.277,1.0	0.339	0.00729312	chr16	89546673	89546674
KD SERBP1	5651	ENSG00000197912.15	SPG7	RI	chr16	+	89545871-89546030:89546030-89546657:89546657-89546760	1.0,1.0,0.729	0.434,0.277,1.0	0.339	0.00729312	chr16	89546689	89546690
KD SERBP1	5651	ENSG00000197912.15	SPG7	RI	chr16	+	89545871-89546030:89546030-89546657:89546657-89546760	1.0,1.0,0.729	0.434,0.277,1.0	0.339	0.00729312	chr16	89546735	89546736
KD SERBP1	5651	ENSG00000197912.15	SPG7	RI	chr16	+	89545871-89546030:89546030-89546657:89546657-89546760	1.0,1.0,0.729	0.434,0.277,1.0	0.339	0.00729312	chr16	89546743	89546744
KD SERBP1	5155	ENSG00000146243.13	IRAK1BP1	A3SS	chr6	+	78897828-78897959:78898063-78903102:78902618-78903102	1.0,1.0,1.0	0.606,0.753,0.629	0.337	0.0364525	chr6	78898096	78898097
KD SERBP1	5155	ENSG00000146243.13	IRAK1BP1	A3SS	chr6	+	78897828-78897959:78898063-78903102:78902618-78903102	1.0,1.0,1.0	0.606,0.753,0.629	0.337	0.0364525	chr6	78898655	78898656
KD SERBP1	5155	ENSG00000146243.13	IRAK1BP1	A3SS	chr6	+	78897828-78897959:78898063-78903102:78902618-78903102	1.0,1.0,1.0	0.606,0.753,0.629	0.337	0.0364525	chr6	78899482	78899483
KD SERBP1	5155	ENSG00000146243.13	IRAK1BP1	A3SS	chr6	+	78897828-78897959:78898063-78903102:78902618-78903102	1.0,1.0,1.0	0.606,0.753,0.629	0.337	0.0364525	chr6	78899605	78899606
KD SERBP1	5155	ENSG00000146243.13	IRAK1BP1	A3SS	chr6	+	78897828-78897959:78898063-78903102:78902618-78903102	1.0,1.0,1.0	0.606,0.753,0.629	0.337	0.0364525	chr6	78900055	78900056
KD SERBP1	5155	ENSG00000146243.13	IRAK1BP1	A3SS	chr6	+	78897828-78897959:78898063-78903102:78902618-78903102	1.0,1.0,1.0	0.606,0.753,0.629	0.337	0.0364525	chr6	78901269	78901270
KD SERBP1	5155	ENSG00000146243.13	IRAK1BP1	A3SS	chr6	+	78897828-78897959:78898063-78903102:78902618-78903102	1.0,1.0,1.0	0.606,0.753,0.629	0.337	0.0364525	chr6	78902373	78902374
KD SERBP1	31571	ENSG00000068745.14	IP6K2	SE	chr3	-	48708119-48708237:48715314-48715527:48717156-48717188	0.277,0.535,0.279	0.812,0.774,0.507	0.334	0.0451072	chr3	48715598	48715599
KD SERBP1	31571	ENSG00000068745.14	IP6K2	SE	chr3	-	48708119-48708237:48715314-48715527:48717156-48717188	0.277,0.535,0.279	0.812,0.774,0.507	0.334	0.0451072	chr3	48715623	48715624
KD SERBP1	31571	ENSG00000068745.14	IP6K2	SE	chr3	-	48708119-48708237:48715314-48715527:48717156-48717188	0.277,0.535,0.279	0.812,0.774,0.507	0.334	0.0451072	chr3	48715624	48715625
KD SERBP1	3552	ENSG00000114626.17	ABTB1	RI	chr3	+	127676535-127676581:127676581-127677167:127677167-127677286	1.0,0.169,1.0	1.0,0.0,0.169	0.333	0.000399797	chr3	127676856	127676857
KD SERBP1	3552	ENSG00000114626.17	ABTB1	RI	chr3	+	127676535-127676581:127676581-127677167:127677167-127677286	1.0,0.169,1.0	1.0,0.0,0.169	0.333	0.000399797	chr3	127676977	127676978
KD SERBP1	3552	ENSG00000114626.17	ABTB1	RI	chr3	+	127676535-127676581:127676581-127677167:127677167-127677286	1.0,0.169,1.0	1.0,0.0,0.169	0.333	0.000399797	chr3	127676996	127676997
KD SERBP1	3552	ENSG00000114626.17	ABTB1	RI	chr3	+	127676535-127676581:127676581-127677167:127677167-127677286	1.0,0.169,1.0	1.0,0.0,0.169	0.333	0.000399797	chr3	127677049	127677050
KD SERBP1	5359	ENSG00000170581.13	STAT2	A5SS	chr12	-	56349344-56349509:56349425-56349509:56348751-56348804	1.0,1.0,1.0	1.0,0.633,0.368	0.333	0.0011422	chr12	56349329	56349330
KD SERBP1	5359	ENSG00000170581.13	STAT2	A5SS	chr12	-	56349344-56349509:56349425-56349509:56348751-56348804	1.0,1.0,1.0	1.0,0.633,0.368	0.333	0.0011422	chr12	56349477	56349478
KD SERBP1	64372	ENSG00000108352.12	RAPGEFL1	SE	chr17	+	40178248-40178381:40181298-40181373:40181615-40181694	1.0,0.0,0.0	1.0,0.0,1.0	0.333	0.000607466	chr17	40181272	40181273
KD SERBP1	64372	ENSG00000108352.12	RAPGEFL1	SE	chr17	+	40178248-40178381:40181298-40181373:40181615-40181694	1.0,0.0,0.0	1.0,0.0,1.0	0.333	0.000607466	chr17	40181305	40181306
KD SERBP1	64372	ENSG00000108352.12	RAPGEFL1	SE	chr17	+	40178248-40178381:40181298-40181373:40181615-40181694	1.0,0.0,0.0	1.0,0.0,1.0	0.333	0.000607466	chr17	40181359	40181360
KD SERBP1	64372	ENSG00000108352.12	RAPGEFL1	SE	chr17	+	40178248-40178381:40181298-40181373:40181615-40181694	1.0,0.0,0.0	1.0,0.0,1.0	0.333	0.000607466	chr17	40181370	40181371
KD SERBP1	3655	ENSG00000157036.12	EXOG	A5SS	chr3	+	38497628-38497689:38497628-38497684:38501354-38501494	1.0,1.0,0.744	0.744,0.356,0.659	0.328	0.00423678	chr3	38497585	38497586
KD SERBP1	3655	ENSG00000157036.12	EXOG	A5SS	chr3	+	38497628-38497689:38497628-38497684:38501354-38501494	1.0,1.0,0.744	0.744,0.356,0.659	0.328	0.00423678	chr3	38497587	38497588
KD SERBP1	3655	ENSG00000157036.12	EXOG	A5SS	chr3	+	38497628-38497689:38497628-38497684:38501354-38501494	1.0,1.0,0.744	0.744,0.356,0.659	0.328	0.00423678	chr3	38497607	38497608
KD SERBP1	3655	ENSG00000157036.12	EXOG	A5SS	chr3	+	38497628-38497689:38497628-38497684:38501354-38501494	1.0,1.0,0.744	0.744,0.356,0.659	0.328	0.00423678	chr3	38497608	38497609
KD SERBP1	3655	ENSG00000157036.12	EXOG	A5SS	chr3	+	38497628-38497689:38497628-38497684:38501354-38501494	1.0,1.0,0.744	0.744,0.356,0.659	0.328	0.00423678	chr3	38497611	38497612
KD SERBP1	3655	ENSG00000157036.12	EXOG	A5SS	chr3	+	38497628-38497689:38497628-38497684:38501354-38501494	1.0,1.0,0.744	0.744,0.356,0.659	0.328	0.00423678	chr3	38497617	38497618
KD SERBP1	1418	ENSG00000204713.10	TRIM27	A3SS	chr6	-	28911695-28911718:28903001-28908840:28903001-28904665	0.849,1.0,1.0	0.779,0.508,0.588	0.325	0.000515406	chr6	28904785	28904786
KD SERBP1	1418	ENSG00000204713.10	TRIM27	A3SS	chr6	-	28911695-28911718:28903001-28908840:28903001-28904665	0.849,1.0,1.0	0.779,0.508,0.588	0.325	0.000515406	chr6	28905294	28905295
KD SERBP1	1418	ENSG00000204713.10	TRIM27	A3SS	chr6	-	28911695-28911718:28903001-28908840:28903001-28904665	0.849,1.0,1.0	0.779,0.508,0.588	0.325	0.000515406	chr6	28905732	28905733
KD SERBP1	1418	ENSG00000204713.10	TRIM27	A3SS	chr6	-	28911695-28911718:28903001-28908840:28903001-28904665	0.849,1.0,1.0	0.779,0.508,0.588	0.325	0.000515406	chr6	28906199	28906200
KD SERBP1	1418	ENSG00000204713.10	TRIM27	A3SS	chr6	-	28911695-28911718:28903001-28908840:28903001-28904665	0.849,1.0,1.0	0.779,0.508,0.588	0.325	0.000515406	chr6	28906868	28906869
KD SERBP1	1418	ENSG00000204713.10	TRIM27	A3SS	chr6	-	28911695-28911718:28903001-28908840:28903001-28904665	0.849,1.0,1.0	0.779,0.508,0.588	0.325	0.000515406	chr6	28907261	28907262
KD SERBP1	1418	ENSG00000204713.10	TRIM27	A3SS	chr6	-	28911695-28911718:28903001-28908840:28903001-28904665	0.849,1.0,1.0	0.779,0.508,0.588	0.325	0.000515406	chr6	28907315	28907316
KD SERBP1	1418	ENSG00000204713.10	TRIM27	A3SS	chr6	-	28911695-28911718:28903001-28908840:28903001-28904665	0.849,1.0,1.0	0.779,0.508,0.588	0.325	0.000515406	chr6	28907317	28907318
KD SERBP1	1418	ENSG00000204713.10	TRIM27	A3SS	chr6	-	28911695-28911718:28903001-28908840:28903001-28904665	0.849,1.0,1.0	0.779,0.508,0.588	0.325	0.000515406	chr6	28907494	28907495
KD SERBP1	1418	ENSG00000204713.10	TRIM27	A3SS	chr6	-	28911695-28911718:28903001-28908840:28903001-28904665	0.849,1.0,1.0	0.779,0.508,0.588	0.325	0.000515406	chr6	28908219	28908220
KD SERBP1	1418	ENSG00000204713.10	TRIM27	A3SS	chr6	-	28911695-28911718:28903001-28908840:28903001-28904665	0.849,1.0,1.0	0.779,0.508,0.588	0.325	0.000515406	chr6	28908220	28908221
KD SERBP1	1418	ENSG00000204713.10	TRIM27	A3SS	chr6	-	28911695-28911718:28903001-28908840:28903001-28904665	0.849,1.0,1.0	0.779,0.508,0.588	0.325	0.000515406	chr6	28908862	28908863
KD SERBP1	1418	ENSG00000204713.10	TRIM27	A3SS	chr6	-	28911695-28911718:28903001-28908840:28903001-28904665	0.849,1.0,1.0	0.779,0.508,0.588	0.325	0.000515406	chr6	28908907	28908908
KD SERBP1	514	ENSG00000160410.14	SHKBP1	A5SS	chr19	+	40577556-40577709:40577556-40577630:40578461-40578542	1.0,0.723,0.495	1.0,0.246,0.0	0.324	0.00695788	chr19	40577554	40577555
KD SERBP1	514	ENSG00000160410.14	SHKBP1	A5SS	chr19	+	40577556-40577709:40577556-40577630:40578461-40578542	1.0,0.723,0.495	1.0,0.246,0.0	0.324	0.00695788	chr19	40577589	40577590
KD SERBP1	2269	ENSG00000123737.12	EXOSC9	A3SS	chr4	+	121811582-121811671:121813754-121814047:121813865-121814047	1.0,0.863,1.0	0.632,0.632,0.632	0.322	0.022843	chr4	121813781	121813782
KD SERBP1	2269	ENSG00000123737.12	EXOSC9	A3SS	chr4	+	121811582-121811671:121813754-121814047:121813865-121814047	1.0,0.863,1.0	0.632,0.632,0.632	0.322	0.022843	chr4	121813868	121813869
KD SERBP1	2269	ENSG00000123737.12	EXOSC9	A3SS	chr4	+	121811582-121811671:121813754-121814047:121813865-121814047	1.0,0.863,1.0	0.632,0.632,0.632	0.322	0.022843	chr4	121813885	121813886
KD SERBP1	2269	ENSG00000123737.12	EXOSC9	A3SS	chr4	+	121811582-121811671:121813754-121814047:121813865-121814047	1.0,0.863,1.0	0.632,0.632,0.632	0.322	0.022843	chr4	121813889	121813890
KD SERBP1	2269	ENSG00000123737.12	EXOSC9	A3SS	chr4	+	121811582-121811671:121813754-121814047:121813865-121814047	1.0,0.863,1.0	0.632,0.632,0.632	0.322	0.022843	chr4	121813920	121813921
KD SERBP1	2269	ENSG00000123737.12	EXOSC9	A3SS	chr4	+	121811582-121811671:121813754-121814047:121813865-121814047	1.0,0.863,1.0	0.632,0.632,0.632	0.322	0.022843	chr4	121813922	121813923
KD SERBP1	2269	ENSG00000123737.12	EXOSC9	A3SS	chr4	+	121811582-121811671:121813754-121814047:121813865-121814047	1.0,0.863,1.0	0.632,0.632,0.632	0.322	0.022843	chr4	121813941	121813942
KD SERBP1	2269	ENSG00000123737.12	EXOSC9	A3SS	chr4	+	121811582-121811671:121813754-121814047:121813865-121814047	1.0,0.863,1.0	0.632,0.632,0.632	0.322	0.022843	chr4	121813944	121813945
KD SERBP1	2269	ENSG00000123737.12	EXOSC9	A3SS	chr4	+	121811582-121811671:121813754-121814047:121813865-121814047	1.0,0.863,1.0	0.632,0.632,0.632	0.322	0.022843	chr4	121813947	121813948
KD SERBP1	2269	ENSG00000123737.12	EXOSC9	A3SS	chr4	+	121811582-121811671:121813754-121814047:121813865-121814047	1.0,0.863,1.0	0.632,0.632,0.632	0.322	0.022843	chr4	121813948	121813949
KD SERBP1	3424	ENSG00000088340.15	FER1L4	RI	chr20	-	35559340-35559627:35559627-35560539:35560539-35560638	0.558,1.0,1.0	0.27,0.33,1.0	0.319	0.00499349	chr20	35560144	35560145
KD SERBP1	3424	ENSG00000088340.15	FER1L4	RI	chr20	-	35559340-35559627:35559627-35560539:35560539-35560638	0.558,1.0,1.0	0.27,0.33,1.0	0.319	0.00499349	chr20	35560166	35560167
KD SERBP1	3424	ENSG00000088340.15	FER1L4	RI	chr20	-	35559340-35559627:35559627-35560539:35560539-35560638	0.558,1.0,1.0	0.27,0.33,1.0	0.319	0.00499349	chr20	35560175	35560176
KD SERBP1	3424	ENSG00000088340.15	FER1L4	RI	chr20	-	35559340-35559627:35559627-35560539:35560539-35560638	0.558,1.0,1.0	0.27,0.33,1.0	0.319	0.00499349	chr20	35560400	35560401
KD SERBP1	3424	ENSG00000088340.15	FER1L4	RI	chr20	-	35559340-35559627:35559627-35560539:35560539-35560638	0.558,1.0,1.0	0.27,0.33,1.0	0.319	0.00499349	chr20	35560409	35560410
KD SERBP1	3424	ENSG00000088340.15	FER1L4	RI	chr20	-	35559340-35559627:35559627-35560539:35560539-35560638	0.558,1.0,1.0	0.27,0.33,1.0	0.319	0.00499349	chr20	35560504	35560505
KD SERBP1	3424	ENSG00000088340.15	FER1L4	RI	chr20	-	35559340-35559627:35559627-35560539:35560539-35560638	0.558,1.0,1.0	0.27,0.33,1.0	0.319	0.00499349	chr20	35560552	35560553
KD SERBP1	3424	ENSG00000088340.15	FER1L4	RI	chr20	-	35559340-35559627:35559627-35560539:35560539-35560638	0.558,1.0,1.0	0.27,0.33,1.0	0.319	0.00499349	chr20	35560569	35560570
KD SERBP1	3424	ENSG00000088340.15	FER1L4	RI	chr20	-	35559340-35559627:35559627-35560539:35560539-35560638	0.558,1.0,1.0	0.27,0.33,1.0	0.319	0.00499349	chr20	35560617	35560618
KD SERBP1	12386	ENSG00000172766.18	NAA16	MXE	chr13	+	41331273-41331369:41336649-41336756:41355143-41355216:41358303-41358718	0.722,0.849,0.943	0.394,0.494,0.684	0.314	0.0300185	chr13	41336605	41336606
KD SERBP1	12386	ENSG00000172766.18	NAA16	MXE	chr13	+	41331273-41331369:41336649-41336756:41355143-41355216:41358303-41358718	0.722,0.849,0.943	0.394,0.494,0.684	0.314	0.0300185	chr13	41336638	41336639
KD SERBP1	5686	ENSG00000113163.16	COL4A3BP	A3SS	chr5	-	75411010-75411103:75400204-75403058:75400204-75400297	1.0,1.0,1.0	1.0,0.51,0.556	0.311	0.0365638	chr5	75400209	75400210
KD SERBP1	5686	ENSG00000113163.16	COL4A3BP	A3SS	chr5	-	75411010-75411103:75400204-75403058:75400204-75400297	1.0,1.0,1.0	1.0,0.51,0.556	0.311	0.0365638	chr5	75403021	75403022
KD SERBP1	10694	ENSG00000107669.17	ATE1	MXE	chr10	-	121910905-121911151:121913789-121913893:121924265-121924329:121927843-121928063	0.586,0.609,0.389	0.109,0.237,0.308	0.31	0.0135595	chr10	121924297	121924298
KD SERBP1	10694	ENSG00000107669.17	ATE1	MXE	chr10	-	121910905-121911151:121913789-121913893:121924265-121924329:121927843-121928063	0.586,0.609,0.389	0.109,0.237,0.308	0.31	0.0135595	chr10	121924304	121924305
KD SERBP1	10694	ENSG00000107669.17	ATE1	MXE	chr10	-	121910905-121911151:121913789-121913893:121924265-121924329:121927843-121928063	0.586,0.609,0.389	0.109,0.237,0.308	0.31	0.0135595	chr10	121924373	121924374
KD SERBP1	30117	ENSG00000166169.16	POLL	SE	chr10	-	101585861-101586156:101587121-101587200:101588203-101588248	0.45,1.0,0.395	1.0,1.0,0.766	0.307	0.00959714	chr10	101587277	101587278
KD SERBP1	30117	ENSG00000166169.16	POLL	SE	chr10	-	101585861-101586156:101587121-101587200:101588203-101588248	0.45,1.0,0.395	1.0,1.0,0.766	0.307	0.00959714	chr10	101587283	101587284
KD SERBP1	5438	ENSG00000116560.10	SFPQ	A3SS	chr1	-	35177988-35178036:35176377-35176474:35176377-35176471	1.0,1.0,1.0	0.648,0.864,0.578	0.303	9.40495e-05	chr1	35176375	35176376
KD SERBP1	5438	ENSG00000116560.10	SFPQ	A3SS	chr1	-	35177988-35178036:35176377-35176474:35176377-35176471	1.0,1.0,1.0	0.648,0.864,0.578	0.303	9.40495e-05	chr1	35176443	35176444
KD SERBP1	5438	ENSG00000116560.10	SFPQ	A3SS	chr1	-	35177988-35178036:35176377-35176474:35176377-35176471	1.0,1.0,1.0	0.648,0.864,0.578	0.303	9.40495e-05	chr1	35176454	35176455
KD SERBP1	5438	ENSG00000116560.10	SFPQ	A3SS	chr1	-	35177988-35178036:35176377-35176474:35176377-35176471	1.0,1.0,1.0	0.648,0.864,0.578	0.303	9.40495e-05	chr1	35176465	35176466
KD SERBP1	5438	ENSG00000116560.10	SFPQ	A3SS	chr1	-	35177988-35178036:35176377-35176474:35176377-35176471	1.0,1.0,1.0	0.648,0.864,0.578	0.303	9.40495e-05	chr1	35176467	35176468
KD SERBP1	5438	ENSG00000116560.10	SFPQ	A3SS	chr1	-	35177988-35178036:35176377-35176474:35176377-35176471	1.0,1.0,1.0	0.648,0.864,0.578	0.303	9.40495e-05	chr1	35176469	35176470
KD SERBP1	9443	ENSG00000153048.10	CARHSP1	A3SS	chr16	-	8868048-8868401:8860104-8860309:8860104-8860218	1.0,1.0,1.0	1.0,0.713,0.383	0.301	0.00623765	chr16	8860143	8860144
KD SERBP1	9443	ENSG00000153048.10	CARHSP1	A3SS	chr16	-	8868048-8868401:8860104-8860309:8860104-8860218	1.0,1.0,1.0	1.0,0.713,0.383	0.301	0.00623765	chr16	8860290	8860291
KD SERBP1	10176	ENSG00000134470.20	IL15RA	MXE	chr10	-	5959753-5959786:5960366-5960468:5963742-5963841:5966144-5966339	0.378,0.415,0.574	0.158,0.16,0.152	0.299	0.0413362	chr10	5960411	5960412
KD SERBP1	10176	ENSG00000134470.20	IL15RA	MXE	chr10	-	5959753-5959786:5960366-5960468:5963742-5963841:5966144-5966339	0.378,0.415,0.574	0.158,0.16,0.152	0.299	0.0413362	chr10	5960456	5960457
KD SERBP1	10176	ENSG00000134470.20	IL15RA	MXE	chr10	-	5959753-5959786:5960366-5960468:5963742-5963841:5966144-5966339	0.378,0.415,0.574	0.158,0.16,0.152	0.299	0.0413362	chr10	5960534	5960535
KD SERBP1	10176	ENSG00000134470.20	IL15RA	MXE	chr10	-	5959753-5959786:5960366-5960468:5963742-5963841:5966144-5966339	0.378,0.415,0.574	0.158,0.16,0.152	0.299	0.0413362	chr10	5960544	5960545
KD SERBP1	6466	ENSG00000213930.11	GALT	A3SS	chr9	+	34647088-34647258:34647540-34648171:34648114-34648171	1.0,1.0,1.0	1.0,0.472,0.632	0.299	0.0089247	chr9	34647535	34647536
KD SERBP1	6466	ENSG00000213930.11	GALT	A3SS	chr9	+	34647088-34647258:34647540-34648171:34648114-34648171	1.0,1.0,1.0	1.0,0.472,0.632	0.299	0.0089247	chr9	34647595	34647596
KD SERBP1	6466	ENSG00000213930.11	GALT	A3SS	chr9	+	34647088-34647258:34647540-34648171:34648114-34648171	1.0,1.0,1.0	1.0,0.472,0.632	0.299	0.0089247	chr9	34647622	34647623
KD SERBP1	6466	ENSG00000213930.11	GALT	A3SS	chr9	+	34647088-34647258:34647540-34648171:34648114-34648171	1.0,1.0,1.0	1.0,0.472,0.632	0.299	0.0089247	chr9	34647726	34647727
KD SERBP1	6466	ENSG00000213930.11	GALT	A3SS	chr9	+	34647088-34647258:34647540-34648171:34648114-34648171	1.0,1.0,1.0	1.0,0.472,0.632	0.299	0.0089247	chr9	34647967	34647968
KD SERBP1	6466	ENSG00000213930.11	GALT	A3SS	chr9	+	34647088-34647258:34647540-34648171:34648114-34648171	1.0,1.0,1.0	1.0,0.472,0.632	0.299	0.0089247	chr9	34647982	34647983
KD SERBP1	6466	ENSG00000213930.11	GALT	A3SS	chr9	+	34647088-34647258:34647540-34648171:34648114-34648171	1.0,1.0,1.0	1.0,0.472,0.632	0.299	0.0089247	chr9	34648094	34648095
KD SERBP1	83586	ENSG00000184916.8	JAG2	SE	chr14	-	105150864-105150911:105150990-105151104:105151282-105151396	0.872,0.665,0.569	1.0,1.0,1.0	0.298	0.0170422	chr14	105150944	105150945
KD SERBP1	83586	ENSG00000184916.8	JAG2	SE	chr14	-	105150864-105150911:105150990-105151104:105151282-105151396	0.872,0.665,0.569	1.0,1.0,1.0	0.298	0.0170422	chr14	105150982	105150983
KD SERBP1	83586	ENSG00000184916.8	JAG2	SE	chr14	-	105150864-105150911:105150990-105151104:105151282-105151396	0.872,0.665,0.569	1.0,1.0,1.0	0.298	0.0170422	chr14	105150983	105150984
KD SERBP1	83586	ENSG00000184916.8	JAG2	SE	chr14	-	105150864-105150911:105150990-105151104:105151282-105151396	0.872,0.665,0.569	1.0,1.0,1.0	0.298	0.0170422	chr14	105151128	105151129
KD SERBP1	36353	ENSG00000092199.17	HNRNPC	SE	chr14	-	21212959-21213117:21230957-21231072:21269297-21269409	0.0,0.158,0.0	0.53,0.414,0.101	0.296	0.00649051	chr14	21230977	21230978
KD SERBP1	36353	ENSG00000092199.17	HNRNPC	SE	chr14	-	21212959-21213117:21230957-21231072:21269297-21269409	0.0,0.158,0.0	0.53,0.414,0.101	0.296	0.00649051	chr14	21231019	21231020
KD SERBP1	36353	ENSG00000092199.17	HNRNPC	SE	chr14	-	21212959-21213117:21230957-21231072:21269297-21269409	0.0,0.158,0.0	0.53,0.414,0.101	0.296	0.00649051	chr14	21231050	21231051
KD SERBP1	36353	ENSG00000092199.17	HNRNPC	SE	chr14	-	21212959-21213117:21230957-21231072:21269297-21269409	0.0,0.158,0.0	0.53,0.414,0.101	0.296	0.00649051	chr14	21231058	21231059
KD SERBP1	36353	ENSG00000092199.17	HNRNPC	SE	chr14	-	21212959-21213117:21230957-21231072:21269297-21269409	0.0,0.158,0.0	0.53,0.414,0.101	0.296	0.00649051	chr14	21231069	21231070
KD SERBP1	27878	ENSG00000254641.1	AC091564.3	SE	chr11	-	6608666-6608725:6608836-6608978:6609907-6610135	0.0,0.0,0.0	0.0,0.406,0.473	0.293	0.00281427	chr11	6608749	6608750
KD SERBP1	27878	ENSG00000254641.1	AC091564.3	SE	chr11	-	6608666-6608725:6608836-6608978:6609907-6610135	0.0,0.0,0.0	0.0,0.406,0.473	0.293	0.00281427	chr11	6608754	6608755
KD SERBP1	27878	ENSG00000254641.1	AC091564.3	SE	chr11	-	6608666-6608725:6608836-6608978:6609907-6610135	0.0,0.0,0.0	0.0,0.406,0.473	0.293	0.00281427	chr11	6608766	6608767
KD SERBP1	27878	ENSG00000254641.1	AC091564.3	SE	chr11	-	6608666-6608725:6608836-6608978:6609907-6610135	0.0,0.0,0.0	0.0,0.406,0.473	0.293	0.00281427	chr11	6608783	6608784
KD SERBP1	27878	ENSG00000254641.1	AC091564.3	SE	chr11	-	6608666-6608725:6608836-6608978:6609907-6610135	0.0,0.0,0.0	0.0,0.406,0.473	0.293	0.00281427	chr11	6608883	6608884
KD SERBP1	27878	ENSG00000254641.1	AC091564.3	SE	chr11	-	6608666-6608725:6608836-6608978:6609907-6610135	0.0,0.0,0.0	0.0,0.406,0.473	0.293	0.00281427	chr11	6608936	6608937
KD SERBP1	27878	ENSG00000254641.1	AC091564.3	SE	chr11	-	6608666-6608725:6608836-6608978:6609907-6610135	0.0,0.0,0.0	0.0,0.406,0.473	0.293	0.00281427	chr11	6608942	6608943
KD SERBP1	27878	ENSG00000254641.1	AC091564.3	SE	chr11	-	6608666-6608725:6608836-6608978:6609907-6610135	0.0,0.0,0.0	0.0,0.406,0.473	0.293	0.00281427	chr11	6608949	6608950
KD SERBP1	27878	ENSG00000254641.1	AC091564.3	SE	chr11	-	6608666-6608725:6608836-6608978:6609907-6610135	0.0,0.0,0.0	0.0,0.406,0.473	0.293	0.00281427	chr11	6608958	6608959
KD SERBP1	27878	ENSG00000254641.1	AC091564.3	SE	chr11	-	6608666-6608725:6608836-6608978:6609907-6610135	0.0,0.0,0.0	0.0,0.406,0.473	0.293	0.00281427	chr11	6608968	6608969
KD SERBP1	27878	ENSG00000254641.1	AC091564.3	SE	chr11	-	6608666-6608725:6608836-6608978:6609907-6610135	0.0,0.0,0.0	0.0,0.406,0.473	0.293	0.00281427	chr11	6609052	6609053
KD SERBP1	6468	ENSG00000213930.11	GALT	A3SS	chr9	+	34647088-34647258:34648047-34648171:34648114-34648171	1.0,1.0,1.0	1.0,0.717,0.408	0.292	0.0254233	chr9	34647967	34647968
KD SERBP1	6468	ENSG00000213930.11	GALT	A3SS	chr9	+	34647088-34647258:34648047-34648171:34648114-34648171	1.0,1.0,1.0	1.0,0.717,0.408	0.292	0.0254233	chr9	34647982	34647983
KD SERBP1	6468	ENSG00000213930.11	GALT	A3SS	chr9	+	34647088-34647258:34648047-34648171:34648114-34648171	1.0,1.0,1.0	1.0,0.717,0.408	0.292	0.0254233	chr9	34648094	34648095
KD SERBP1	3682	ENSG00000054654.16	SYNE2	MXE	chr14	+	64002719-64003330:64007042-64007222:64009965-64010116:64016472-64016631	0.854,0.725,0.609	0.451,0.412,0.451	0.291	0.00965991	chr14	64006987	64006988
KD SERBP1	3682	ENSG00000054654.16	SYNE2	MXE	chr14	+	64002719-64003330:64007042-64007222:64009965-64010116:64016472-64016631	0.854,0.725,0.609	0.451,0.412,0.451	0.291	0.00965991	chr14	64007054	64007055
KD SERBP1	3682	ENSG00000054654.16	SYNE2	MXE	chr14	+	64002719-64003330:64007042-64007222:64009965-64010116:64016472-64016631	0.854,0.725,0.609	0.451,0.412,0.451	0.291	0.00965991	chr14	64007133	64007134
KD SERBP1	3682	ENSG00000054654.16	SYNE2	MXE	chr14	+	64002719-64003330:64007042-64007222:64009965-64010116:64016472-64016631	0.854,0.725,0.609	0.451,0.412,0.451	0.291	0.00965991	chr14	64010047	64010048
KD SERBP1	3682	ENSG00000054654.16	SYNE2	MXE	chr14	+	64002719-64003330:64007042-64007222:64009965-64010116:64016472-64016631	0.854,0.725,0.609	0.451,0.412,0.451	0.291	0.00965991	chr14	64010061	64010062
KD SERBP1	17514	ENSG00000242802.7	AP5Z1	SE	chr7	+	4781174-4781312:4783315-4783460:4784202-4784371	0.82,0.603,0.537	0.921,1.0,0.901	0.287	0.00649071	chr7	4783438	4783439
KD SERBP1	17514	ENSG00000242802.7	AP5Z1	SE	chr7	+	4781174-4781312:4783315-4783460:4784202-4784371	0.82,0.603,0.537	0.921,1.0,0.901	0.287	0.00649071	chr7	4783498	4783499
KD SERBP1	17514	ENSG00000242802.7	AP5Z1	SE	chr7	+	4781174-4781312:4783315-4783460:4784202-4784371	0.82,0.603,0.537	0.921,1.0,0.901	0.287	0.00649071	chr7	4783506	4783507
KD SERBP1	17514	ENSG00000242802.7	AP5Z1	SE	chr7	+	4781174-4781312:4783315-4783460:4784202-4784371	0.82,0.603,0.537	0.921,1.0,0.901	0.287	0.00649071	chr7	4783511	4783512
KD SERBP1	17514	ENSG00000242802.7	AP5Z1	SE	chr7	+	4781174-4781312:4783315-4783460:4784202-4784371	0.82,0.603,0.537	0.921,1.0,0.901	0.287	0.00649071	chr7	4783514	4783515
KD SERBP1	17514	ENSG00000242802.7	AP5Z1	SE	chr7	+	4781174-4781312:4783315-4783460:4784202-4784371	0.82,0.603,0.537	0.921,1.0,0.901	0.287	0.00649071	chr7	4783541	4783542
KD SERBP1	3476	ENSG00000082258.12	CCNT2	A5SS	chr2	+	134946100-134946465:134946100-134946146:134947735-134947899	0.637,0.515,0.315	0.248,0.06,0.305	0.285	0.0201431	chr2	134946073	134946074
KD SERBP1	3476	ENSG00000082258.12	CCNT2	A5SS	chr2	+	134946100-134946465:134946100-134946146:134947735-134947899	0.637,0.515,0.315	0.248,0.06,0.305	0.285	0.0201431	chr2	134946082	134946083
KD SERBP1	3476	ENSG00000082258.12	CCNT2	A5SS	chr2	+	134946100-134946465:134946100-134946146:134947735-134947899	0.637,0.515,0.315	0.248,0.06,0.305	0.285	0.0201431	chr2	134946086	134946087
KD SERBP1	3476	ENSG00000082258.12	CCNT2	A5SS	chr2	+	134946100-134946465:134946100-134946146:134947735-134947899	0.637,0.515,0.315	0.248,0.06,0.305	0.285	0.0201431	chr2	134946087	134946088
KD SERBP1	3476	ENSG00000082258.12	CCNT2	A5SS	chr2	+	134946100-134946465:134946100-134946146:134947735-134947899	0.637,0.515,0.315	0.248,0.06,0.305	0.285	0.0201431	chr2	134946418	134946419
KD SERBP1	3476	ENSG00000082258.12	CCNT2	A5SS	chr2	+	134946100-134946465:134946100-134946146:134947735-134947899	0.637,0.515,0.315	0.248,0.06,0.305	0.285	0.0201431	chr2	134946438	134946439
KD SERBP1	5421	ENSG00000122335.15	SERAC1	A3SS	chr6	-	158158272-158158364:158150452-158150589:158150452-158150587	1.0,0.664,1.0	0.747,0.559,0.526	0.277	0.00370352	chr6	158150499	158150500
KD SERBP1	5421	ENSG00000122335.15	SERAC1	A3SS	chr6	-	158158272-158158364:158150452-158150589:158150452-158150587	1.0,0.664,1.0	0.747,0.559,0.526	0.277	0.00370352	chr6	158150555	158150556
KD SERBP1	15343	ENSG00000167460.15	TPM4	SE	chr19	+	16077020-16077130:16080914-16081075:16081912-16082046	0.375,0.569,1.0	0.771,1.0,1.0	0.276	0.00753365	chr19	16080893	16080894
KD SERBP1	15343	ENSG00000167460.15	TPM4	SE	chr19	+	16077020-16077130:16080914-16081075:16081912-16082046	0.375,0.569,1.0	0.771,1.0,1.0	0.276	0.00753365	chr19	16080896	16080897
KD SERBP1	15343	ENSG00000167460.15	TPM4	SE	chr19	+	16077020-16077130:16080914-16081075:16081912-16082046	0.375,0.569,1.0	0.771,1.0,1.0	0.276	0.00753365	chr19	16080973	16080974
KD SERBP1	15343	ENSG00000167460.15	TPM4	SE	chr19	+	16077020-16077130:16080914-16081075:16081912-16082046	0.375,0.569,1.0	0.771,1.0,1.0	0.276	0.00753365	chr19	16081031	16081032
KD SERBP1	3776	ENSG00000213930.11	GALT	RI	chr9	+	34647088-34647258:34647258-34648114:34648114-34648171	1.0,1.0,1.0	1.0,0.532,0.64	0.276	0.00537213	chr9	34647188	34647189
KD SERBP1	3776	ENSG00000213930.11	GALT	RI	chr9	+	34647088-34647258:34647258-34648114:34648114-34648171	1.0,1.0,1.0	1.0,0.532,0.64	0.276	0.00537213	chr9	34647240	34647241
KD SERBP1	3776	ENSG00000213930.11	GALT	RI	chr9	+	34647088-34647258:34647258-34648114:34648114-34648171	1.0,1.0,1.0	1.0,0.532,0.64	0.276	0.00537213	chr9	34647287	34647288
KD SERBP1	3776	ENSG00000213930.11	GALT	RI	chr9	+	34647088-34647258:34647258-34648114:34648114-34648171	1.0,1.0,1.0	1.0,0.532,0.64	0.276	0.00537213	chr9	34647425	34647426
KD SERBP1	3776	ENSG00000213930.11	GALT	RI	chr9	+	34647088-34647258:34647258-34648114:34648114-34648171	1.0,1.0,1.0	1.0,0.532,0.64	0.276	0.00537213	chr9	34647535	34647536
KD SERBP1	3776	ENSG00000213930.11	GALT	RI	chr9	+	34647088-34647258:34647258-34648114:34648114-34648171	1.0,1.0,1.0	1.0,0.532,0.64	0.276	0.00537213	chr9	34647595	34647596
KD SERBP1	3776	ENSG00000213930.11	GALT	RI	chr9	+	34647088-34647258:34647258-34648114:34648114-34648171	1.0,1.0,1.0	1.0,0.532,0.64	0.276	0.00537213	chr9	34647622	34647623
KD SERBP1	3776	ENSG00000213930.11	GALT	RI	chr9	+	34647088-34647258:34647258-34648114:34648114-34648171	1.0,1.0,1.0	1.0,0.532,0.64	0.276	0.00537213	chr9	34647726	34647727
KD SERBP1	3776	ENSG00000213930.11	GALT	RI	chr9	+	34647088-34647258:34647258-34648114:34648114-34648171	1.0,1.0,1.0	1.0,0.532,0.64	0.276	0.00537213	chr9	34647967	34647968
KD SERBP1	3776	ENSG00000213930.11	GALT	RI	chr9	+	34647088-34647258:34647258-34648114:34648114-34648171	1.0,1.0,1.0	1.0,0.532,0.64	0.276	0.00537213	chr9	34647982	34647983
KD SERBP1	3776	ENSG00000213930.11	GALT	RI	chr9	+	34647088-34647258:34647258-34648114:34648114-34648171	1.0,1.0,1.0	1.0,0.532,0.64	0.276	0.00537213	chr9	34648094	34648095
KD SERBP1	3944	ENSG00000177943.13	MAMDC4	RI	chr9	+	136859208-136859317:136859317-136859885:136859885-136860064	1.0,0.798,0.737	0.702,0.284,0.722	0.276	0.0384117	chr9	136859445	136859446
KD SERBP1	3944	ENSG00000177943.13	MAMDC4	RI	chr9	+	136859208-136859317:136859317-136859885:136859885-136860064	1.0,0.798,0.737	0.702,0.284,0.722	0.276	0.0384117	chr9	136859479	136859480
KD SERBP1	3944	ENSG00000177943.13	MAMDC4	RI	chr9	+	136859208-136859317:136859317-136859885:136859885-136860064	1.0,0.798,0.737	0.702,0.284,0.722	0.276	0.0384117	chr9	136859518	136859519
KD SERBP1	3944	ENSG00000177943.13	MAMDC4	RI	chr9	+	136859208-136859317:136859317-136859885:136859885-136860064	1.0,0.798,0.737	0.702,0.284,0.722	0.276	0.0384117	chr9	136859649	136859650
KD SERBP1	3944	ENSG00000177943.13	MAMDC4	RI	chr9	+	136859208-136859317:136859317-136859885:136859885-136860064	1.0,0.798,0.737	0.702,0.284,0.722	0.276	0.0384117	chr9	136859943	136859944
KD SERBP1	16961	ENSG00000234062.7	AL390879.1	SE	chrX	+	136909394-136909780:136921243-136922776:136925246-136925379	0.579,0.751,0.334	0.739,0.745,1.0	0.273	0.0286034	chrX	136921777	136921778
KD SERBP1	16961	ENSG00000234062.7	AL390879.1	SE	chrX	+	136909394-136909780:136921243-136922776:136925246-136925379	0.579,0.751,0.334	0.739,0.745,1.0	0.273	0.0286034	chrX	136922475	136922476
KD SERBP1	2683	ENSG00000177000.12	MTHFR	RI	chr1	-	11802880-11803129:11803129-11803404:11803404-11803526	1.0,1.0,0.794	1.0,0.584,0.413	0.266	0.0022184	chr1	11803092	11803093
KD SERBP1	2683	ENSG00000177000.12	MTHFR	RI	chr1	-	11802880-11803129:11803129-11803404:11803404-11803526	1.0,1.0,0.794	1.0,0.584,0.413	0.266	0.0022184	chr1	11803164	11803165
KD SERBP1	2683	ENSG00000177000.12	MTHFR	RI	chr1	-	11802880-11803129:11803129-11803404:11803404-11803526	1.0,1.0,0.794	1.0,0.584,0.413	0.266	0.0022184	chr1	11803167	11803168
KD SERBP1	2320	ENSG00000164609.9	SLU7	A5SS	chr5	-	160418595-160419081:160419022-160419081:160417111-160417241	1.0,0.0,1.0	0.206,0.28,0.721	0.264	0.0375425	chr5	160418998	160418999
KD SERBP1	2320	ENSG00000164609.9	SLU7	A5SS	chr5	-	160418595-160419081:160419022-160419081:160417111-160417241	1.0,0.0,1.0	0.206,0.28,0.721	0.264	0.0375425	chr5	160419039	160419040
KD SERBP1	70042	ENSG00000149273.14	RPS3	SE	chr11	+	75399519-75399577:75401639-75401733:75404671-75404730	0.235,0.424,0.551	1.0,0.0,1.0	0.263	0.038718	chr11	75401673	75401674
KD SERBP1	70042	ENSG00000149273.14	RPS3	SE	chr11	+	75399519-75399577:75401639-75401733:75404671-75404730	0.235,0.424,0.551	1.0,0.0,1.0	0.263	0.038718	chr11	75401686	75401687
KD SERBP1	70042	ENSG00000149273.14	RPS3	SE	chr11	+	75399519-75399577:75401639-75401733:75404671-75404730	0.235,0.424,0.551	1.0,0.0,1.0	0.263	0.038718	chr11	75401714	75401715
KD SERBP1	70042	ENSG00000149273.14	RPS3	SE	chr11	+	75399519-75399577:75401639-75401733:75404671-75404730	0.235,0.424,0.551	1.0,0.0,1.0	0.263	0.038718	chr11	75401775	75401776
KD SERBP1	49254	ENSG00000176261.15	ZBTB8OS	SE	chr1	-	32627507-32627544:32633950-32634072:32650401-32650525	0.49,0.099,1.0	1.0,0.355,1.0	0.255	0.0139521	chr1	32633993	32633994
KD SERBP1	49254	ENSG00000176261.15	ZBTB8OS	SE	chr1	-	32627507-32627544:32633950-32634072:32650401-32650525	0.49,0.099,1.0	1.0,0.355,1.0	0.255	0.0139521	chr1	32634124	32634125
KD SERBP1	67011	ENSG00000148399.12	DPH7	SE	chr9	-	137565084-137565154:137574751-137574846:137576079-137576167	0.647,0.667,0.594	0.928,1.0,0.733	0.251	0.00606764	chr9	137574767	137574768
KD SERBP1	67011	ENSG00000148399.12	DPH7	SE	chr9	-	137565084-137565154:137574751-137574846:137576079-137576167	0.647,0.667,0.594	0.928,1.0,0.733	0.251	0.00606764	chr9	137574849	137574850
KD SERBP1	67011	ENSG00000148399.12	DPH7	SE	chr9	-	137565084-137565154:137574751-137574846:137576079-137576167	0.647,0.667,0.594	0.928,1.0,0.733	0.251	0.00606764	chr9	137574924	137574925
KD SERBP1	4411	ENSG00000001631.15	KRIT1	A5SS	chr7	-	92245789-92245914:92245843-92245914:92244901-92245171	1.0,1.0,1.0	0.669,0.786,0.801	0.248	0.0048888	chr7	92245696	92245697
KD SERBP1	4411	ENSG00000001631.15	KRIT1	A5SS	chr7	-	92245789-92245914:92245843-92245914:92244901-92245171	1.0,1.0,1.0	0.669,0.786,0.801	0.248	0.0048888	chr7	92245753	92245754
KD SERBP1	4411	ENSG00000001631.15	KRIT1	A5SS	chr7	-	92245789-92245914:92245843-92245914:92244901-92245171	1.0,1.0,1.0	0.669,0.786,0.801	0.248	0.0048888	chr7	92245874	92245875
KD SERBP1	4411	ENSG00000001631.15	KRIT1	A5SS	chr7	-	92245789-92245914:92245843-92245914:92244901-92245171	1.0,1.0,1.0	0.669,0.786,0.801	0.248	0.0048888	chr7	92245913	92245914
KD SERBP1	48697	ENSG00000177565.16	TBL1XR1	SE	chr3	-	177098486-177098541:177110808-177110887:177131362-177131449	0.0,0.246,0.0	0.359,0.495,0.133	0.247	0.00643824	chr3	177110709	177110710
KD SERBP1	48697	ENSG00000177565.16	TBL1XR1	SE	chr3	-	177098486-177098541:177110808-177110887:177131362-177131449	0.0,0.246,0.0	0.359,0.495,0.133	0.247	0.00643824	chr3	177110742	177110743
KD SERBP1	99712	ENSG00000171466.9	ZNF562	SE	chr19	-	9652278-9653881:9659378-9659467:9660719-9660821	0.61,0.898,0.75	1.0,1.0,1.0	0.247	0.000596246	chr19	9659338	9659339
KD SERBP1	99712	ENSG00000171466.9	ZNF562	SE	chr19	-	9652278-9653881:9659378-9659467:9660719-9660821	0.61,0.898,0.75	1.0,1.0,1.0	0.247	0.000596246	chr19	9659449	9659450
KD SERBP1	99712	ENSG00000171466.9	ZNF562	SE	chr19	-	9652278-9653881:9659378-9659467:9660719-9660821	0.61,0.898,0.75	1.0,1.0,1.0	0.247	0.000596246	chr19	9659460	9659461
KD SERBP1	16586	ENSG00000152348.15	ATG10	SE	chr5	+	82178489-82178587:82252561-82252659:82276144-82276297	0.491,0.644,0.723	0.809,0.882,0.906	0.246	0.038046	chr5	82252534	82252535
KD SERBP1	16586	ENSG00000152348.15	ATG10	SE	chr5	+	82178489-82178587:82252561-82252659:82276144-82276297	0.491,0.644,0.723	0.809,0.882,0.906	0.246	0.038046	chr5	82252592	82252593
KD SERBP1	16586	ENSG00000152348.15	ATG10	SE	chr5	+	82178489-82178587:82252561-82252659:82276144-82276297	0.491,0.644,0.723	0.809,0.882,0.906	0.246	0.038046	chr5	82252615	82252616
KD SERBP1	57523	ENSG00000141446.10	ESCO1	SE	chr18	-	21529280-21530490:21532472-21532660:21536041-21536185	0.699,0.399,1.0	1.0,1.0,0.829	0.244	0.0221453	chr18	21532588	21532589
KD SERBP1	57523	ENSG00000141446.10	ESCO1	SE	chr18	-	21529280-21530490:21532472-21532660:21536041-21536185	0.699,0.399,1.0	1.0,1.0,0.829	0.244	0.0221453	chr18	21532650	21532651
KD SERBP1	28736	ENSG00000106723.16	SPIN1	SE	chr9	+	88388429-88388538:88448940-88448989:88468371-88468605	0.653,0.751,0.819	1.0,1.0,0.948	0.242	0.00293746	chr9	88448920	88448921
KD SERBP1	28736	ENSG00000106723.16	SPIN1	SE	chr9	+	88388429-88388538:88448940-88448989:88468371-88468605	0.653,0.751,0.819	1.0,1.0,0.948	0.242	0.00293746	chr9	88448950	88448951
KD SERBP1	28736	ENSG00000106723.16	SPIN1	SE	chr9	+	88388429-88388538:88448940-88448989:88468371-88468605	0.653,0.751,0.819	1.0,1.0,0.948	0.242	0.00293746	chr9	88448960	88448961
KD SERBP1	28736	ENSG00000106723.16	SPIN1	SE	chr9	+	88388429-88388538:88448940-88448989:88468371-88468605	0.653,0.751,0.819	1.0,1.0,0.948	0.242	0.00293746	chr9	88448962	88448963
KD SERBP1	67621	ENSG00000165996.13	HACD1	SE	chr10	-	17594204-17594383:17599289-17599411:17603929-17604047	0.798,0.815,0.551	0.943,1.0,0.948	0.242	0.000526208	chr10	17599213	17599214
KD SERBP1	67621	ENSG00000165996.13	HACD1	SE	chr10	-	17594204-17594383:17599289-17599411:17603929-17604047	0.798,0.815,0.551	0.943,1.0,0.948	0.242	0.000526208	chr10	17599348	17599349
KD SERBP1	100709	ENSG00000268362.5	AC092279.1	SE	chr19	+	24049404-24049548:24063815-24063941:24065462-24066688	0.404,1.0,0.876	1.0,1.0,1.0	0.24	0.0107715	chr19	24063790	24063791
KD SERBP1	100709	ENSG00000268362.5	AC092279.1	SE	chr19	+	24049404-24049548:24063815-24063941:24065462-24066688	0.404,1.0,0.876	1.0,1.0,1.0	0.24	0.0107715	chr19	24063849	24063850
KD SERBP1	5099	ENSG00000183426.16	NPIPA1	A5SS	chr16	+	14929250-14930031:14929250-14929421:14930165-14930322	0.906,0.797,1.0	0.525,0.836,0.621	0.24	0.025757	chr16	14929335	14929336
KD SERBP1	5099	ENSG00000183426.16	NPIPA1	A5SS	chr16	+	14929250-14930031:14929250-14929421:14930165-14930322	0.906,0.797,1.0	0.525,0.836,0.621	0.24	0.025757	chr16	14929357	14929358
KD SERBP1	5099	ENSG00000183426.16	NPIPA1	A5SS	chr16	+	14929250-14930031:14929250-14929421:14930165-14930322	0.906,0.797,1.0	0.525,0.836,0.621	0.24	0.025757	chr16	14929361	14929362
KD SERBP1	31297	ENSG00000105997.22	HOXA3	SE	chr7	-	27122558-27122642:27126885-27127070:27140082-27140219	0.0,0.0,0.0	0.182,0.401,0.129	0.237	0.00435902	chr7	27126866	27126867
KD SERBP1	31297	ENSG00000105997.22	HOXA3	SE	chr7	-	27122558-27122642:27126885-27127070:27140082-27140219	0.0,0.0,0.0	0.182,0.401,0.129	0.237	0.00435902	chr7	27126870	27126871
KD SERBP1	31297	ENSG00000105997.22	HOXA3	SE	chr7	-	27122558-27122642:27126885-27127070:27140082-27140219	0.0,0.0,0.0	0.182,0.401,0.129	0.237	0.00435902	chr7	27126956	27126957
KD SERBP1	31297	ENSG00000105997.22	HOXA3	SE	chr7	-	27122558-27122642:27126885-27127070:27140082-27140219	0.0,0.0,0.0	0.182,0.401,0.129	0.237	0.00435902	chr7	27127044	27127045
KD SERBP1	31297	ENSG00000105997.22	HOXA3	SE	chr7	-	27122558-27122642:27126885-27127070:27140082-27140219	0.0,0.0,0.0	0.182,0.401,0.129	0.237	0.00435902	chr7	27127084	27127085
KD SERBP1	4476	ENSG00000168763.15	CNNM3	RI	chr2	+	96827730-96827900:96827900-96828995:96828995-96829134	0.917,0.857,0.791	0.59,0.622,0.642	0.237	0.0167795	chr2	96827856	96827857
KD SERBP1	4476	ENSG00000168763.15	CNNM3	RI	chr2	+	96827730-96827900:96827900-96828995:96828995-96829134	0.917,0.857,0.791	0.59,0.622,0.642	0.237	0.0167795	chr2	96828354	96828355
KD SERBP1	4476	ENSG00000168763.15	CNNM3	RI	chr2	+	96827730-96827900:96827900-96828995:96828995-96829134	0.917,0.857,0.791	0.59,0.622,0.642	0.237	0.0167795	chr2	96828582	96828583
KD SERBP1	4476	ENSG00000168763.15	CNNM3	RI	chr2	+	96827730-96827900:96827900-96828995:96828995-96829134	0.917,0.857,0.791	0.59,0.622,0.642	0.237	0.0167795	chr2	96828652	96828653
KD SERBP1	4476	ENSG00000168763.15	CNNM3	RI	chr2	+	96827730-96827900:96827900-96828995:96828995-96829134	0.917,0.857,0.791	0.59,0.622,0.642	0.237	0.0167795	chr2	96828661	96828662
KD SERBP1	4476	ENSG00000168763.15	CNNM3	RI	chr2	+	96827730-96827900:96827900-96828995:96828995-96829134	0.917,0.857,0.791	0.59,0.622,0.642	0.237	0.0167795	chr2	96828678	96828679
KD SERBP1	4476	ENSG00000168763.15	CNNM3	RI	chr2	+	96827730-96827900:96827900-96828995:96828995-96829134	0.917,0.857,0.791	0.59,0.622,0.642	0.237	0.0167795	chr2	96829016	96829017
KD SERBP1	1135	ENSG00000229180.7	AC006001.3	MXE	chr7	-	66573384-66573550:66576754-66576929:66588511-66588580:66592256-66592397	0.598,0.498,0.382	0.294,0.268,0.22	0.232	0.0240986	chr7	66576796	66576797
KD SERBP1	1135	ENSG00000229180.7	AC006001.3	MXE	chr7	-	66573384-66573550:66576754-66576929:66588511-66588580:66592256-66592397	0.598,0.498,0.382	0.294,0.268,0.22	0.232	0.0240986	chr7	66576820	66576821
KD SERBP1	1135	ENSG00000229180.7	AC006001.3	MXE	chr7	-	66573384-66573550:66576754-66576929:66588511-66588580:66592256-66592397	0.598,0.498,0.382	0.294,0.268,0.22	0.232	0.0240986	chr7	66576922	66576923
KD SERBP1	1135	ENSG00000229180.7	AC006001.3	MXE	chr7	-	66573384-66573550:66576754-66576929:66588511-66588580:66592256-66592397	0.598,0.498,0.382	0.294,0.268,0.22	0.232	0.0240986	chr7	66576941	66576942
KD SERBP1	1135	ENSG00000229180.7	AC006001.3	MXE	chr7	-	66573384-66573550:66576754-66576929:66588511-66588580:66592256-66592397	0.598,0.498,0.382	0.294,0.268,0.22	0.232	0.0240986	chr7	66588553	66588554
KD SERBP1	87615	ENSG00000167004.12	PDIA3	SE	chr15	+	43768488-43768597:43770249-43770329:43771104-43771545	1.0,0.82,0.51	1.0,1.0,1.0	0.223	0.0414931	chr15	43770249	43770250
KD SERBP1	87615	ENSG00000167004.12	PDIA3	SE	chr15	+	43768488-43768597:43770249-43770329:43771104-43771545	1.0,0.82,0.51	1.0,1.0,1.0	0.223	0.0414931	chr15	43770258	43770259
KD SERBP1	87615	ENSG00000167004.12	PDIA3	SE	chr15	+	43768488-43768597:43770249-43770329:43771104-43771545	1.0,0.82,0.51	1.0,1.0,1.0	0.223	0.0414931	chr15	43770260	43770261
KD SERBP1	87615	ENSG00000167004.12	PDIA3	SE	chr15	+	43768488-43768597:43770249-43770329:43771104-43771545	1.0,0.82,0.51	1.0,1.0,1.0	0.223	0.0414931	chr15	43770293	43770294
KD SERBP1	87615	ENSG00000167004.12	PDIA3	SE	chr15	+	43768488-43768597:43770249-43770329:43771104-43771545	1.0,0.82,0.51	1.0,1.0,1.0	0.223	0.0414931	chr15	43770295	43770296
KD SERBP1	87615	ENSG00000167004.12	PDIA3	SE	chr15	+	43768488-43768597:43770249-43770329:43771104-43771545	1.0,0.82,0.51	1.0,1.0,1.0	0.223	0.0414931	chr15	43770299	43770300
KD SERBP1	87615	ENSG00000167004.12	PDIA3	SE	chr15	+	43768488-43768597:43770249-43770329:43771104-43771545	1.0,0.82,0.51	1.0,1.0,1.0	0.223	0.0414931	chr15	43770312	43770313
KD SERBP1	87615	ENSG00000167004.12	PDIA3	SE	chr15	+	43768488-43768597:43770249-43770329:43771104-43771545	1.0,0.82,0.51	1.0,1.0,1.0	0.223	0.0414931	chr15	43770321	43770322
KD SERBP1	2861	ENSG00000242086.8	MUC20-OT1	RI	chr3	+	195708153-195708513:195708513-195708746:195708746-195708841	1.0,1.0,1.0	1.0,0.854,0.484	0.221	0.0356865	chr3	195708489	195708490
KD SERBP1	2861	ENSG00000242086.8	MUC20-OT1	RI	chr3	+	195708153-195708513:195708513-195708746:195708746-195708841	1.0,1.0,1.0	1.0,0.854,0.484	0.221	0.0356865	chr3	195708767	195708768
KD SERBP1	5050	ENSG00000100888.13	CHD8	RI	chr14	-	21428963-21429335:21429335-21431810:21431810-21431858	0.706,0.805,0.708	0.555,0.467,0.542	0.218	0.00183712	chr14	21429272	21429273
KD SERBP1	5050	ENSG00000100888.13	CHD8	RI	chr14	-	21428963-21429335:21429335-21431810:21431810-21431858	0.706,0.805,0.708	0.555,0.467,0.542	0.218	0.00183712	chr14	21429308	21429309
KD SERBP1	5050	ENSG00000100888.13	CHD8	RI	chr14	-	21428963-21429335:21429335-21431810:21431810-21431858	0.706,0.805,0.708	0.555,0.467,0.542	0.218	0.00183712	chr14	21429485	21429486
KD SERBP1	5050	ENSG00000100888.13	CHD8	RI	chr14	-	21428963-21429335:21429335-21431810:21431810-21431858	0.706,0.805,0.708	0.555,0.467,0.542	0.218	0.00183712	chr14	21429622	21429623
KD SERBP1	5050	ENSG00000100888.13	CHD8	RI	chr14	-	21428963-21429335:21429335-21431810:21431810-21431858	0.706,0.805,0.708	0.555,0.467,0.542	0.218	0.00183712	chr14	21429983	21429984
KD SERBP1	5050	ENSG00000100888.13	CHD8	RI	chr14	-	21428963-21429335:21429335-21431810:21431810-21431858	0.706,0.805,0.708	0.555,0.467,0.542	0.218	0.00183712	chr14	21429995	21429996
KD SERBP1	5050	ENSG00000100888.13	CHD8	RI	chr14	-	21428963-21429335:21429335-21431810:21431810-21431858	0.706,0.805,0.708	0.555,0.467,0.542	0.218	0.00183712	chr14	21430029	21430030
KD SERBP1	5050	ENSG00000100888.13	CHD8	RI	chr14	-	21428963-21429335:21429335-21431810:21431810-21431858	0.706,0.805,0.708	0.555,0.467,0.542	0.218	0.00183712	chr14	21430037	21430038
KD SERBP1	5050	ENSG00000100888.13	CHD8	RI	chr14	-	21428963-21429335:21429335-21431810:21431810-21431858	0.706,0.805,0.708	0.555,0.467,0.542	0.218	0.00183712	chr14	21430236	21430237
KD SERBP1	5050	ENSG00000100888.13	CHD8	RI	chr14	-	21428963-21429335:21429335-21431810:21431810-21431858	0.706,0.805,0.708	0.555,0.467,0.542	0.218	0.00183712	chr14	21430269	21430270
KD SERBP1	5050	ENSG00000100888.13	CHD8	RI	chr14	-	21428963-21429335:21429335-21431810:21431810-21431858	0.706,0.805,0.708	0.555,0.467,0.542	0.218	0.00183712	chr14	21430413	21430414
KD SERBP1	5050	ENSG00000100888.13	CHD8	RI	chr14	-	21428963-21429335:21429335-21431810:21431810-21431858	0.706,0.805,0.708	0.555,0.467,0.542	0.218	0.00183712	chr14	21431051	21431052
KD SERBP1	5050	ENSG00000100888.13	CHD8	RI	chr14	-	21428963-21429335:21429335-21431810:21431810-21431858	0.706,0.805,0.708	0.555,0.467,0.542	0.218	0.00183712	chr14	21431222	21431223
KD SERBP1	5050	ENSG00000100888.13	CHD8	RI	chr14	-	21428963-21429335:21429335-21431810:21431810-21431858	0.706,0.805,0.708	0.555,0.467,0.542	0.218	0.00183712	chr14	21431304	21431305
KD SERBP1	5050	ENSG00000100888.13	CHD8	RI	chr14	-	21428963-21429335:21429335-21431810:21431810-21431858	0.706,0.805,0.708	0.555,0.467,0.542	0.218	0.00183712	chr14	21431353	21431354
KD SERBP1	5050	ENSG00000100888.13	CHD8	RI	chr14	-	21428963-21429335:21429335-21431810:21431810-21431858	0.706,0.805,0.708	0.555,0.467,0.542	0.218	0.00183712	chr14	21431401	21431402
KD SERBP1	5050	ENSG00000100888.13	CHD8	RI	chr14	-	21428963-21429335:21429335-21431810:21431810-21431858	0.706,0.805,0.708	0.555,0.467,0.542	0.218	0.00183712	chr14	21431429	21431430
KD SERBP1	5050	ENSG00000100888.13	CHD8	RI	chr14	-	21428963-21429335:21429335-21431810:21431810-21431858	0.706,0.805,0.708	0.555,0.467,0.542	0.218	0.00183712	chr14	21431449	21431450
KD SERBP1	5050	ENSG00000100888.13	CHD8	RI	chr14	-	21428963-21429335:21429335-21431810:21431810-21431858	0.706,0.805,0.708	0.555,0.467,0.542	0.218	0.00183712	chr14	21431518	21431519
KD SERBP1	5050	ENSG00000100888.13	CHD8	RI	chr14	-	21428963-21429335:21429335-21431810:21431810-21431858	0.706,0.805,0.708	0.555,0.467,0.542	0.218	0.00183712	chr14	21431519	21431520
KD SERBP1	5050	ENSG00000100888.13	CHD8	RI	chr14	-	21428963-21429335:21429335-21431810:21431810-21431858	0.706,0.805,0.708	0.555,0.467,0.542	0.218	0.00183712	chr14	21431544	21431545
KD SERBP1	5050	ENSG00000100888.13	CHD8	RI	chr14	-	21428963-21429335:21429335-21431810:21431810-21431858	0.706,0.805,0.708	0.555,0.467,0.542	0.218	0.00183712	chr14	21431644	21431645
KD SERBP1	5050	ENSG00000100888.13	CHD8	RI	chr14	-	21428963-21429335:21429335-21431810:21431810-21431858	0.706,0.805,0.708	0.555,0.467,0.542	0.218	0.00183712	chr14	21431709	21431710
KD SERBP1	5050	ENSG00000100888.13	CHD8	RI	chr14	-	21428963-21429335:21429335-21431810:21431810-21431858	0.706,0.805,0.708	0.555,0.467,0.542	0.218	0.00183712	chr14	21431817	21431818
KD SERBP1	5050	ENSG00000100888.13	CHD8	RI	chr14	-	21428963-21429335:21429335-21431810:21431810-21431858	0.706,0.805,0.708	0.555,0.467,0.542	0.218	0.00183712	chr14	21431845	21431846
KD SERBP1	27501	ENSG00000140416.20	TPM1	SE	chr15	+	63042750-63042943:63043468-63043831:63056984-63057010	0.739,0.85,0.612	1.0,0.85,1.0	0.216	0.00696774	chr15	63043383	63043384
KD SERBP1	27501	ENSG00000140416.20	TPM1	SE	chr15	+	63042750-63042943:63043468-63043831:63056984-63057010	0.739,0.85,0.612	1.0,0.85,1.0	0.216	0.00696774	chr15	63043488	63043489
KD SERBP1	27501	ENSG00000140416.20	TPM1	SE	chr15	+	63042750-63042943:63043468-63043831:63056984-63057010	0.739,0.85,0.612	1.0,0.85,1.0	0.216	0.00696774	chr15	63043515	63043516
KD SERBP1	27501	ENSG00000140416.20	TPM1	SE	chr15	+	63042750-63042943:63043468-63043831:63056984-63057010	0.739,0.85,0.612	1.0,0.85,1.0	0.216	0.00696774	chr15	63043579	63043580
KD SERBP1	27501	ENSG00000140416.20	TPM1	SE	chr15	+	63042750-63042943:63043468-63043831:63056984-63057010	0.739,0.85,0.612	1.0,0.85,1.0	0.216	0.00696774	chr15	63043649	63043650
KD SERBP1	27501	ENSG00000140416.20	TPM1	SE	chr15	+	63042750-63042943:63043468-63043831:63056984-63057010	0.739,0.85,0.612	1.0,0.85,1.0	0.216	0.00696774	chr15	63043653	63043654
KD SERBP1	27501	ENSG00000140416.20	TPM1	SE	chr15	+	63042750-63042943:63043468-63043831:63056984-63057010	0.739,0.85,0.612	1.0,0.85,1.0	0.216	0.00696774	chr15	63043736	63043737
KD SERBP1	27501	ENSG00000140416.20	TPM1	SE	chr15	+	63042750-63042943:63043468-63043831:63056984-63057010	0.739,0.85,0.612	1.0,0.85,1.0	0.216	0.00696774	chr15	63043795	63043796
KD SERBP1	27501	ENSG00000140416.20	TPM1	SE	chr15	+	63042750-63042943:63043468-63043831:63056984-63057010	0.739,0.85,0.612	1.0,0.85,1.0	0.216	0.00696774	chr15	63043873	63043874
KD SERBP1	27501	ENSG00000140416.20	TPM1	SE	chr15	+	63042750-63042943:63043468-63043831:63056984-63057010	0.739,0.85,0.612	1.0,0.85,1.0	0.216	0.00696774	chr15	63043878	63043879
KD SERBP1	27501	ENSG00000140416.20	TPM1	SE	chr15	+	63042750-63042943:63043468-63043831:63056984-63057010	0.739,0.85,0.612	1.0,0.85,1.0	0.216	0.00696774	chr15	63043882	63043883
KD SERBP1	27501	ENSG00000140416.20	TPM1	SE	chr15	+	63042750-63042943:63043468-63043831:63056984-63057010	0.739,0.85,0.612	1.0,0.85,1.0	0.216	0.00696774	chr15	63043884	63043885
KD SERBP1	27501	ENSG00000140416.20	TPM1	SE	chr15	+	63042750-63042943:63043468-63043831:63056984-63057010	0.739,0.85,0.612	1.0,0.85,1.0	0.216	0.00696774	chr15	63043904	63043905
KD SERBP1	27501	ENSG00000140416.20	TPM1	SE	chr15	+	63042750-63042943:63043468-63043831:63056984-63057010	0.739,0.85,0.612	1.0,0.85,1.0	0.216	0.00696774	chr15	63043907	63043908
KD SERBP1	8210	ENSG00000075711.20	DLG1	MXE	chr3	-	197069218-197069260:197075836-197075870:197076585-197076682:197081050-197081117	0.874,0.849,0.896	0.667,0.627,0.679	0.215	4.2913e-10	chr3	197075743	197075744
KD SERBP1	8210	ENSG00000075711.20	DLG1	MXE	chr3	-	197069218-197069260:197075836-197075870:197076585-197076682:197081050-197081117	0.874,0.849,0.896	0.667,0.627,0.679	0.215	4.2913e-10	chr3	197075856	197075857
KD SERBP1	8210	ENSG00000075711.20	DLG1	MXE	chr3	-	197069218-197069260:197075836-197075870:197076585-197076682:197081050-197081117	0.874,0.849,0.896	0.667,0.627,0.679	0.215	4.2913e-10	chr3	197076637	197076638
KD SERBP1	8210	ENSG00000075711.20	DLG1	MXE	chr3	-	197069218-197069260:197075836-197075870:197076585-197076682:197081050-197081117	0.874,0.849,0.896	0.667,0.627,0.679	0.215	4.2913e-10	chr3	197076640	197076641
KD SERBP1	8210	ENSG00000075711.20	DLG1	MXE	chr3	-	197069218-197069260:197075836-197075870:197076585-197076682:197081050-197081117	0.874,0.849,0.896	0.667,0.627,0.679	0.215	4.2913e-10	chr3	197076651	197076652
KD SERBP1	8210	ENSG00000075711.20	DLG1	MXE	chr3	-	197069218-197069260:197075836-197075870:197076585-197076682:197081050-197081117	0.874,0.849,0.896	0.667,0.627,0.679	0.215	4.2913e-10	chr3	197076677	197076678
KD SERBP1	8210	ENSG00000075711.20	DLG1	MXE	chr3	-	197069218-197069260:197075836-197075870:197076585-197076682:197081050-197081117	0.874,0.849,0.896	0.667,0.627,0.679	0.215	4.2913e-10	chr3	197076678	197076679
KD SERBP1	8210	ENSG00000075711.20	DLG1	MXE	chr3	-	197069218-197069260:197075836-197075870:197076585-197076682:197081050-197081117	0.874,0.849,0.896	0.667,0.627,0.679	0.215	4.2913e-10	chr3	197076704	197076705
KD SERBP1	36899	ENSG00000070501.11	POLB	SE	chr8	+	42344959-42345019:42352518-42352568:42355515-42355567	0.866,0.483,0.847	0.868,0.971,1.0	0.214	0.0213006	chr8	42352528	42352529
KD SERBP1	36899	ENSG00000070501.11	POLB	SE	chr8	+	42344959-42345019:42352518-42352568:42355515-42355567	0.866,0.483,0.847	0.868,0.971,1.0	0.214	0.0213006	chr8	42352555	42352556
KD SERBP1	3090	ENSG00000187796.14	CARD9	RI	chr9	-	136364482-136365217:136365217-136366799:136366799-136366845	1.0,0.664,1.0	0.601,0.647,0.779	0.212	0.0281381	chr9	136365664	136365665
KD SERBP1	3090	ENSG00000187796.14	CARD9	RI	chr9	-	136364482-136365217:136365217-136366799:136366799-136366845	1.0,0.664,1.0	0.601,0.647,0.779	0.212	0.0281381	chr9	136366112	136366113
KD SERBP1	3090	ENSG00000187796.14	CARD9	RI	chr9	-	136364482-136365217:136365217-136366799:136366799-136366845	1.0,0.664,1.0	0.601,0.647,0.779	0.212	0.0281381	chr9	136366143	136366144
KD SERBP1	3090	ENSG00000187796.14	CARD9	RI	chr9	-	136364482-136365217:136365217-136366799:136366799-136366845	1.0,0.664,1.0	0.601,0.647,0.779	0.212	0.0281381	chr9	136366147	136366148
KD SERBP1	2802	ENSG00000134825.15	TMEM258	A5SS	chr11	-	61790374-61790602:61790422-61790602:61789784-61789990	0.708,0.769,0.78	0.608,0.467,0.56	0.207	0.0205185	chr11	61790326	61790327
KD SERBP1	2802	ENSG00000134825.15	TMEM258	A5SS	chr11	-	61790374-61790602:61790422-61790602:61789784-61789990	0.708,0.769,0.78	0.608,0.467,0.56	0.207	0.0205185	chr11	61790486	61790487
KD SERBP1	75249	ENSG00000172965.15	MIR4435-2HG	SE	chr2	-	111207775-111208661:111248147-111248241:111344060-111344237	0.421,0.443,0.488	0.682,0.574,0.717	0.207	0.0392086	chr2	111248060	111248061
KD SERBP1	75249	ENSG00000172965.15	MIR4435-2HG	SE	chr2	-	111207775-111208661:111248147-111248241:111344060-111344237	0.421,0.443,0.488	0.682,0.574,0.717	0.207	0.0392086	chr2	111248141	111248142
KD SERBP1	21830	ENSG00000145868.16	FBXO38	SE	chr5	+	148425521-148425701:148427212-148427722:148433423-148433524	0.607,0.684,0.666	0.893,0.74,0.94	0.205	0.0391322	chr5	148427314	148427315
KD SERBP1	21830	ENSG00000145868.16	FBXO38	SE	chr5	+	148425521-148425701:148427212-148427722:148433423-148433524	0.607,0.684,0.666	0.893,0.74,0.94	0.205	0.0391322	chr5	148427320	148427321
KD SERBP1	21830	ENSG00000145868.16	FBXO38	SE	chr5	+	148425521-148425701:148427212-148427722:148433423-148433524	0.607,0.684,0.666	0.893,0.74,0.94	0.205	0.0391322	chr5	148427348	148427349
KD SERBP1	21830	ENSG00000145868.16	FBXO38	SE	chr5	+	148425521-148425701:148427212-148427722:148433423-148433524	0.607,0.684,0.666	0.893,0.74,0.94	0.205	0.0391322	chr5	148427391	148427392
KD SERBP1	21830	ENSG00000145868.16	FBXO38	SE	chr5	+	148425521-148425701:148427212-148427722:148433423-148433524	0.607,0.684,0.666	0.893,0.74,0.94	0.205	0.0391322	chr5	148427593	148427594
KD SERBP1	21830	ENSG00000145868.16	FBXO38	SE	chr5	+	148425521-148425701:148427212-148427722:148433423-148433524	0.607,0.684,0.666	0.893,0.74,0.94	0.205	0.0391322	chr5	148427684	148427685
KD SERBP1	711	ENSG00000271147.7	ARMCX5-GPRASP2	SE	chrX	+	102605481-102605653:102639399-102639533:102649953-102650145	0.531,1.0,0.853	1.0,1.0,1.0	0.205	0.0023028	chrX	102639444	102639445
KD SERBP1	711	ENSG00000271147.7	ARMCX5-GPRASP2	SE	chrX	+	102605481-102605653:102639399-102639533:102649953-102650145	0.531,1.0,0.853	1.0,1.0,1.0	0.205	0.0023028	chrX	102639461	102639462
KD SERBP1	3752	ENSG00000227036.7	LINC00511	A3SS	chr17	-	72428235-72428298:72420699-72421066:72420699-72420964	0.581,0.439,0.563	0.278,0.366,0.331	0.203	0.0149407	chr17	72421004	72421005
KD SERBP1	3752	ENSG00000227036.7	LINC00511	A3SS	chr17	-	72428235-72428298:72420699-72421066:72420699-72420964	0.581,0.439,0.563	0.278,0.366,0.331	0.203	0.0149407	chr17	72421092	72421093
KD SERBP1	94411	ENSG00000072310.16	SREBF1	SE	chr17	-	17820089-17820521:17823517-17823607:17836726-17836987	0.528,0.488,0.508	0.707,0.708,0.717	0.203	0	chr17	17823471	17823472
KD SERBP1	94411	ENSG00000072310.16	SREBF1	SE	chr17	-	17820089-17820521:17823517-17823607:17836726-17836987	0.528,0.488,0.508	0.707,0.708,0.717	0.203	0	chr17	17823481	17823482
KD SERBP1	94411	ENSG00000072310.16	SREBF1	SE	chr17	-	17820089-17820521:17823517-17823607:17836726-17836987	0.528,0.488,0.508	0.707,0.708,0.717	0.203	0	chr17	17823530	17823531
KD SERBP1	27503	ENSG00000140416.20	TPM1	SE	chr15	+	63042750-63042943:63043705-63043831:63056984-63057118	0.757,0.862,0.692	1.0,0.914,1.0	0.201	0.00378739	chr15	63043649	63043650
KD SERBP1	27503	ENSG00000140416.20	TPM1	SE	chr15	+	63042750-63042943:63043705-63043831:63056984-63057118	0.757,0.862,0.692	1.0,0.914,1.0	0.201	0.00378739	chr15	63043653	63043654
KD SERBP1	27503	ENSG00000140416.20	TPM1	SE	chr15	+	63042750-63042943:63043705-63043831:63056984-63057118	0.757,0.862,0.692	1.0,0.914,1.0	0.201	0.00378739	chr15	63043736	63043737
KD SERBP1	27503	ENSG00000140416.20	TPM1	SE	chr15	+	63042750-63042943:63043705-63043831:63056984-63057118	0.757,0.862,0.692	1.0,0.914,1.0	0.201	0.00378739	chr15	63043795	63043796
KD SERBP1	27503	ENSG00000140416.20	TPM1	SE	chr15	+	63042750-63042943:63043705-63043831:63056984-63057118	0.757,0.862,0.692	1.0,0.914,1.0	0.201	0.00378739	chr15	63043873	63043874
KD SERBP1	27503	ENSG00000140416.20	TPM1	SE	chr15	+	63042750-63042943:63043705-63043831:63056984-63057118	0.757,0.862,0.692	1.0,0.914,1.0	0.201	0.00378739	chr15	63043878	63043879
KD SERBP1	27503	ENSG00000140416.20	TPM1	SE	chr15	+	63042750-63042943:63043705-63043831:63056984-63057118	0.757,0.862,0.692	1.0,0.914,1.0	0.201	0.00378739	chr15	63043882	63043883
KD SERBP1	27503	ENSG00000140416.20	TPM1	SE	chr15	+	63042750-63042943:63043705-63043831:63056984-63057118	0.757,0.862,0.692	1.0,0.914,1.0	0.201	0.00378739	chr15	63043884	63043885
KD SERBP1	27503	ENSG00000140416.20	TPM1	SE	chr15	+	63042750-63042943:63043705-63043831:63056984-63057118	0.757,0.862,0.692	1.0,0.914,1.0	0.201	0.00378739	chr15	63043904	63043905
KD SERBP1	27503	ENSG00000140416.20	TPM1	SE	chr15	+	63042750-63042943:63043705-63043831:63056984-63057118	0.757,0.862,0.692	1.0,0.914,1.0	0.201	0.00378739	chr15	63043907	63043908
KD SERBP1	97428	ENSG00000182446.13	NPLOC4	SE	chr17	-	81572016-81572088:81606690-81606814:81613317-81613402	1.0,0.489,0.766	1.0,1.0,0.857	0.201	0.0414931	chr17	81606714	81606715
KD SERBP1	97428	ENSG00000182446.13	NPLOC4	SE	chr17	-	81572016-81572088:81606690-81606814:81613317-81613402	1.0,0.489,0.766	1.0,1.0,0.857	0.201	0.0414931	chr17	81606728	81606729
KD SERBP1	48903	ENSG00000204839.8	MROH6	SE	chr8	-	143566186-143567465:143567610-143567676:143567785-143567888	0.702,0.754,0.492	0.776,0.847,0.926	0.2	0.0499264	chr8	143567552	143567553
KD SERBP1	48903	ENSG00000204839.8	MROH6	SE	chr8	-	143566186-143567465:143567610-143567676:143567785-143567888	0.702,0.754,0.492	0.776,0.847,0.926	0.2	0.0499264	chr8	143567561	143567562
KD SERBP1	48903	ENSG00000204839.8	MROH6	SE	chr8	-	143566186-143567465:143567610-143567676:143567785-143567888	0.702,0.754,0.492	0.776,0.847,0.926	0.2	0.0499264	chr8	143567578	143567579
KD SERBP1	48903	ENSG00000204839.8	MROH6	SE	chr8	-	143566186-143567465:143567610-143567676:143567785-143567888	0.702,0.754,0.492	0.776,0.847,0.926	0.2	0.0499264	chr8	143567583	143567584
KD SERBP1	48903	ENSG00000204839.8	MROH6	SE	chr8	-	143566186-143567465:143567610-143567676:143567785-143567888	0.702,0.754,0.492	0.776,0.847,0.926	0.2	0.0499264	chr8	143567628	143567629
KD SERBP1	48903	ENSG00000204839.8	MROH6	SE	chr8	-	143566186-143567465:143567610-143567676:143567785-143567888	0.702,0.754,0.492	0.776,0.847,0.926	0.2	0.0499264	chr8	143567751	143567752
KD SERBP1	1438	ENSG00000145020.15	AMT	RI	chr3	-	49419709-49419788:49419788-49420210:49420210-49420342	0.439,1.0,1.0	0.758,0.701,0.383	0.199	0.00499349	chr3	49419752	49419753
KD SERBP1	1438	ENSG00000145020.15	AMT	RI	chr3	-	49419709-49419788:49419788-49420210:49420210-49420342	0.439,1.0,1.0	0.758,0.701,0.383	0.199	0.00499349	chr3	49419768	49419769
KD SERBP1	1438	ENSG00000145020.15	AMT	RI	chr3	-	49419709-49419788:49419788-49420210:49420210-49420342	0.439,1.0,1.0	0.758,0.701,0.383	0.199	0.00499349	chr3	49419802	49419803
KD SERBP1	1438	ENSG00000145020.15	AMT	RI	chr3	-	49419709-49419788:49419788-49420210:49420210-49420342	0.439,1.0,1.0	0.758,0.701,0.383	0.199	0.00499349	chr3	49419902	49419903
KD SERBP1	1438	ENSG00000145020.15	AMT	RI	chr3	-	49419709-49419788:49419788-49420210:49420210-49420342	0.439,1.0,1.0	0.758,0.701,0.383	0.199	0.00499349	chr3	49420044	49420045
KD SERBP1	90405	ENSG00000168096.14	ANKS3	SE	chr16	-	4724749-4724831:4726658-4726780:4729979-4730151	0.532,0.466,0.575	0.644,0.755,0.765	0.197	0.021317	chr16	4726739	4726740
KD SERBP1	90405	ENSG00000168096.14	ANKS3	SE	chr16	-	4724749-4724831:4726658-4726780:4729979-4730151	0.532,0.466,0.575	0.644,0.755,0.765	0.197	0.021317	chr16	4726787	4726788
KD SERBP1	90405	ENSG00000168096.14	ANKS3	SE	chr16	-	4724749-4724831:4726658-4726780:4729979-4730151	0.532,0.466,0.575	0.644,0.755,0.765	0.197	0.021317	chr16	4726868	4726869
KD SERBP1	5537	ENSG00000144283.21	PKP4	A3SS	chr2	+	158631752-158631941:158634069-158634289:158634072-158634289	0.822,0.768,0.837	0.602,0.636,0.609	0.193	0.000205718	chr2	158634094	158634095
KD SERBP1	5537	ENSG00000144283.21	PKP4	A3SS	chr2	+	158631752-158631941:158634069-158634289:158634072-158634289	0.822,0.768,0.837	0.602,0.636,0.609	0.193	0.000205718	chr2	158634108	158634109
KD SERBP1	531	ENSG00000119801.12	YPEL5	A5SS	chr2	+	30148244-30148541:30148244-30148305:30156627-30156792	1.0,1.0,0.941	1.0,0.73,0.64	0.19	0.00396892	chr2	30148329	30148330
KD SERBP1	531	ENSG00000119801.12	YPEL5	A5SS	chr2	+	30148244-30148541:30148244-30148305:30156627-30156792	1.0,1.0,0.941	1.0,0.73,0.64	0.19	0.00396892	chr2	30148573	30148574
KD SERBP1	531	ENSG00000119801.12	YPEL5	A5SS	chr2	+	30148244-30148541:30148244-30148305:30156627-30156792	1.0,1.0,0.941	1.0,0.73,0.64	0.19	0.00396892	chr2	30148596	30148597
KD SERBP1	531	ENSG00000119801.12	YPEL5	A5SS	chr2	+	30148244-30148541:30148244-30148305:30156627-30156792	1.0,1.0,0.941	1.0,0.73,0.64	0.19	0.00396892	chr2	30148604	30148605
KD SERBP1	60048	ENSG00000175455.14	CCDC14	SE	chr3	-	123948895-123949132:123955842-123955965:123956045-123956115	0.711,0.733,0.804	0.854,1.0,0.962	0.189	0.00249239	chr3	123955853	123955854
KD SERBP1	60048	ENSG00000175455.14	CCDC14	SE	chr3	-	123948895-123949132:123955842-123955965:123956045-123956115	0.711,0.733,0.804	0.854,1.0,0.962	0.189	0.00249239	chr3	123955860	123955861
KD SERBP1	60048	ENSG00000175455.14	CCDC14	SE	chr3	-	123948895-123949132:123955842-123955965:123956045-123956115	0.711,0.733,0.804	0.854,1.0,0.962	0.189	0.00249239	chr3	123955866	123955867
KD SERBP1	60048	ENSG00000175455.14	CCDC14	SE	chr3	-	123948895-123949132:123955842-123955965:123956045-123956115	0.711,0.733,0.804	0.854,1.0,0.962	0.189	0.00249239	chr3	123955870	123955871
KD SERBP1	60048	ENSG00000175455.14	CCDC14	SE	chr3	-	123948895-123949132:123955842-123955965:123956045-123956115	0.711,0.733,0.804	0.854,1.0,0.962	0.189	0.00249239	chr3	123955875	123955876
KD SERBP1	60048	ENSG00000175455.14	CCDC14	SE	chr3	-	123948895-123949132:123955842-123955965:123956045-123956115	0.711,0.733,0.804	0.854,1.0,0.962	0.189	0.00249239	chr3	123955920	123955921
KD SERBP1	60048	ENSG00000175455.14	CCDC14	SE	chr3	-	123948895-123949132:123955842-123955965:123956045-123956115	0.711,0.733,0.804	0.854,1.0,0.962	0.189	0.00249239	chr3	123955954	123955955
KD SERBP1	60048	ENSG00000175455.14	CCDC14	SE	chr3	-	123948895-123949132:123955842-123955965:123956045-123956115	0.711,0.733,0.804	0.854,1.0,0.962	0.189	0.00249239	chr3	123955970	123955971
KD SERBP1	60048	ENSG00000175455.14	CCDC14	SE	chr3	-	123948895-123949132:123955842-123955965:123956045-123956115	0.711,0.733,0.804	0.854,1.0,0.962	0.189	0.00249239	chr3	123956012	123956013
KD SERBP1	60048	ENSG00000175455.14	CCDC14	SE	chr3	-	123948895-123949132:123955842-123955965:123956045-123956115	0.711,0.733,0.804	0.854,1.0,0.962	0.189	0.00249239	chr3	123956049	123956050
KD SERBP1	3415	ENSG00000099326.8	MZF1	A5SS	chr19	-	58573054-58573575:58573372-58573575:58570993-58571429	0.771,0.693,0.833	0.653,0.447,0.642	0.185	0.0375425	chr19	58572992	58572993
KD SERBP1	3415	ENSG00000099326.8	MZF1	A5SS	chr19	-	58573054-58573575:58573372-58573575:58570993-58571429	0.771,0.693,0.833	0.653,0.447,0.642	0.185	0.0375425	chr19	58573010	58573011
KD SERBP1	3415	ENSG00000099326.8	MZF1	A5SS	chr19	-	58573054-58573575:58573372-58573575:58570993-58571429	0.771,0.693,0.833	0.653,0.447,0.642	0.185	0.0375425	chr19	58573013	58573014
KD SERBP1	3415	ENSG00000099326.8	MZF1	A5SS	chr19	-	58573054-58573575:58573372-58573575:58570993-58571429	0.771,0.693,0.833	0.653,0.447,0.642	0.185	0.0375425	chr19	58573020	58573021
KD SERBP1	3415	ENSG00000099326.8	MZF1	A5SS	chr19	-	58573054-58573575:58573372-58573575:58570993-58571429	0.771,0.693,0.833	0.653,0.447,0.642	0.185	0.0375425	chr19	58573021	58573022
KD SERBP1	3415	ENSG00000099326.8	MZF1	A5SS	chr19	-	58573054-58573575:58573372-58573575:58570993-58571429	0.771,0.693,0.833	0.653,0.447,0.642	0.185	0.0375425	chr19	58573024	58573025
KD SERBP1	3415	ENSG00000099326.8	MZF1	A5SS	chr19	-	58573054-58573575:58573372-58573575:58570993-58571429	0.771,0.693,0.833	0.653,0.447,0.642	0.185	0.0375425	chr19	58573030	58573031
KD SERBP1	3415	ENSG00000099326.8	MZF1	A5SS	chr19	-	58573054-58573575:58573372-58573575:58570993-58571429	0.771,0.693,0.833	0.653,0.447,0.642	0.185	0.0375425	chr19	58573071	58573072
KD SERBP1	3415	ENSG00000099326.8	MZF1	A5SS	chr19	-	58573054-58573575:58573372-58573575:58570993-58571429	0.771,0.693,0.833	0.653,0.447,0.642	0.185	0.0375425	chr19	58573085	58573086
KD SERBP1	3415	ENSG00000099326.8	MZF1	A5SS	chr19	-	58573054-58573575:58573372-58573575:58570993-58571429	0.771,0.693,0.833	0.653,0.447,0.642	0.185	0.0375425	chr19	58573091	58573092
KD SERBP1	3415	ENSG00000099326.8	MZF1	A5SS	chr19	-	58573054-58573575:58573372-58573575:58570993-58571429	0.771,0.693,0.833	0.653,0.447,0.642	0.185	0.0375425	chr19	58573124	58573125
KD SERBP1	3415	ENSG00000099326.8	MZF1	A5SS	chr19	-	58573054-58573575:58573372-58573575:58570993-58571429	0.771,0.693,0.833	0.653,0.447,0.642	0.185	0.0375425	chr19	58573126	58573127
KD SERBP1	3415	ENSG00000099326.8	MZF1	A5SS	chr19	-	58573054-58573575:58573372-58573575:58570993-58571429	0.771,0.693,0.833	0.653,0.447,0.642	0.185	0.0375425	chr19	58573131	58573132
KD SERBP1	3415	ENSG00000099326.8	MZF1	A5SS	chr19	-	58573054-58573575:58573372-58573575:58570993-58571429	0.771,0.693,0.833	0.653,0.447,0.642	0.185	0.0375425	chr19	58573136	58573137
KD SERBP1	3415	ENSG00000099326.8	MZF1	A5SS	chr19	-	58573054-58573575:58573372-58573575:58570993-58571429	0.771,0.693,0.833	0.653,0.447,0.642	0.185	0.0375425	chr19	58573152	58573153
KD SERBP1	3415	ENSG00000099326.8	MZF1	A5SS	chr19	-	58573054-58573575:58573372-58573575:58570993-58571429	0.771,0.693,0.833	0.653,0.447,0.642	0.185	0.0375425	chr19	58573199	58573200
KD SERBP1	3415	ENSG00000099326.8	MZF1	A5SS	chr19	-	58573054-58573575:58573372-58573575:58570993-58571429	0.771,0.693,0.833	0.653,0.447,0.642	0.185	0.0375425	chr19	58573229	58573230
KD SERBP1	3415	ENSG00000099326.8	MZF1	A5SS	chr19	-	58573054-58573575:58573372-58573575:58570993-58571429	0.771,0.693,0.833	0.653,0.447,0.642	0.185	0.0375425	chr19	58573231	58573232
KD SERBP1	3415	ENSG00000099326.8	MZF1	A5SS	chr19	-	58573054-58573575:58573372-58573575:58570993-58571429	0.771,0.693,0.833	0.653,0.447,0.642	0.185	0.0375425	chr19	58573233	58573234
KD SERBP1	3415	ENSG00000099326.8	MZF1	A5SS	chr19	-	58573054-58573575:58573372-58573575:58570993-58571429	0.771,0.693,0.833	0.653,0.447,0.642	0.185	0.0375425	chr19	58573243	58573244
KD SERBP1	3415	ENSG00000099326.8	MZF1	A5SS	chr19	-	58573054-58573575:58573372-58573575:58570993-58571429	0.771,0.693,0.833	0.653,0.447,0.642	0.185	0.0375425	chr19	58573281	58573282
KD SERBP1	3415	ENSG00000099326.8	MZF1	A5SS	chr19	-	58573054-58573575:58573372-58573575:58570993-58571429	0.771,0.693,0.833	0.653,0.447,0.642	0.185	0.0375425	chr19	58573292	58573293
KD SERBP1	3415	ENSG00000099326.8	MZF1	A5SS	chr19	-	58573054-58573575:58573372-58573575:58570993-58571429	0.771,0.693,0.833	0.653,0.447,0.642	0.185	0.0375425	chr19	58573305	58573306
KD SERBP1	3415	ENSG00000099326.8	MZF1	A5SS	chr19	-	58573054-58573575:58573372-58573575:58570993-58571429	0.771,0.693,0.833	0.653,0.447,0.642	0.185	0.0375425	chr19	58573366	58573367
KD SERBP1	3415	ENSG00000099326.8	MZF1	A5SS	chr19	-	58573054-58573575:58573372-58573575:58570993-58571429	0.771,0.693,0.833	0.653,0.447,0.642	0.185	0.0375425	chr19	58573386	58573387
KD SERBP1	3415	ENSG00000099326.8	MZF1	A5SS	chr19	-	58573054-58573575:58573372-58573575:58570993-58571429	0.771,0.693,0.833	0.653,0.447,0.642	0.185	0.0375425	chr19	58573393	58573394
KD SERBP1	3415	ENSG00000099326.8	MZF1	A5SS	chr19	-	58573054-58573575:58573372-58573575:58570993-58571429	0.771,0.693,0.833	0.653,0.447,0.642	0.185	0.0375425	chr19	58573425	58573426
KD SERBP1	3415	ENSG00000099326.8	MZF1	A5SS	chr19	-	58573054-58573575:58573372-58573575:58570993-58571429	0.771,0.693,0.833	0.653,0.447,0.642	0.185	0.0375425	chr19	58573463	58573464
KD SERBP1	281	ENSG00000124222.22	STX16	A5SS	chr20	+	58652072-58652138:58652072-58652087:58659622-58659634	0.642,0.671,0.531	0.396,0.517,0.383	0.183	0.0209285	chr20	58652005	58652006
KD SERBP1	281	ENSG00000124222.22	STX16	A5SS	chr20	+	58652072-58652138:58652072-58652087:58659622-58659634	0.642,0.671,0.531	0.396,0.517,0.383	0.183	0.0209285	chr20	58652077	58652078
KD SERBP1	13393	ENSG00000172765.17	TMCC1	SE	chr3	-	129857249-129857405:129860939-129861012:129880308-129880559	0.0,0.0,0.0	0.0,0.058,0.489	0.182	0.0228545	chr3	129860974	129860975
KD SERBP1	13393	ENSG00000172765.17	TMCC1	SE	chr3	-	129857249-129857405:129860939-129861012:129880308-129880559	0.0,0.0,0.0	0.0,0.058,0.489	0.182	0.0228545	chr3	129861042	129861043
KD SERBP1	752	ENSG00000114107.8	CEP70	A3SS	chr3	-	138591853-138591956:138572858-138572984:138572858-138572914	1.0,1.0,1.0	0.841,0.685,0.932	0.181	0.000351466	chr3	138572997	138572998
KD SERBP1	752	ENSG00000114107.8	CEP70	A3SS	chr3	-	138591853-138591956:138572858-138572984:138572858-138572914	1.0,1.0,1.0	0.841,0.685,0.932	0.181	0.000351466	chr3	138573017	138573018
KD SERBP1	75456	ENSG00000132952.11	USPL1	SE	chr13	+	30630834-30631474:30637743-30637857:30642627-30642757	1.0,0.613,0.843	1.0,1.0,1.0	0.181	0.0426431	chr13	30637773	30637774
KD SERBP1	75456	ENSG00000132952.11	USPL1	SE	chr13	+	30630834-30631474:30637743-30637857:30642627-30642757	1.0,0.613,0.843	1.0,1.0,1.0	0.181	0.0426431	chr13	30637821	30637822
KD SERBP1	1145	ENSG00000161010.14	MRNIP	RI	chr5	-	179837275-179837885:179837885-179840871:179840871-179840959	0.541,0.568,0.53	0.345,0.397,0.358	0.18	5.59335e-05	chr5	179837852	179837853
KD SERBP1	1145	ENSG00000161010.14	MRNIP	RI	chr5	-	179837275-179837885:179837885-179840871:179840871-179840959	0.541,0.568,0.53	0.345,0.397,0.358	0.18	5.59335e-05	chr5	179837898	179837899
KD SERBP1	1145	ENSG00000161010.14	MRNIP	RI	chr5	-	179837275-179837885:179837885-179840871:179840871-179840959	0.541,0.568,0.53	0.345,0.397,0.358	0.18	5.59335e-05	chr5	179837915	179837916
KD SERBP1	1145	ENSG00000161010.14	MRNIP	RI	chr5	-	179837275-179837885:179837885-179840871:179840871-179840959	0.541,0.568,0.53	0.345,0.397,0.358	0.18	5.59335e-05	chr5	179837978	179837979
KD SERBP1	1145	ENSG00000161010.14	MRNIP	RI	chr5	-	179837275-179837885:179837885-179840871:179840871-179840959	0.541,0.568,0.53	0.345,0.397,0.358	0.18	5.59335e-05	chr5	179838004	179838005
KD SERBP1	1145	ENSG00000161010.14	MRNIP	RI	chr5	-	179837275-179837885:179837885-179840871:179840871-179840959	0.541,0.568,0.53	0.345,0.397,0.358	0.18	5.59335e-05	chr5	179838027	179838028
KD SERBP1	1145	ENSG00000161010.14	MRNIP	RI	chr5	-	179837275-179837885:179837885-179840871:179840871-179840959	0.541,0.568,0.53	0.345,0.397,0.358	0.18	5.59335e-05	chr5	179838139	179838140
KD SERBP1	1145	ENSG00000161010.14	MRNIP	RI	chr5	-	179837275-179837885:179837885-179840871:179840871-179840959	0.541,0.568,0.53	0.345,0.397,0.358	0.18	5.59335e-05	chr5	179838169	179838170
KD SERBP1	1145	ENSG00000161010.14	MRNIP	RI	chr5	-	179837275-179837885:179837885-179840871:179840871-179840959	0.541,0.568,0.53	0.345,0.397,0.358	0.18	5.59335e-05	chr5	179838235	179838236
KD SERBP1	1145	ENSG00000161010.14	MRNIP	RI	chr5	-	179837275-179837885:179837885-179840871:179840871-179840959	0.541,0.568,0.53	0.345,0.397,0.358	0.18	5.59335e-05	chr5	179838241	179838242
KD SERBP1	1145	ENSG00000161010.14	MRNIP	RI	chr5	-	179837275-179837885:179837885-179840871:179840871-179840959	0.541,0.568,0.53	0.345,0.397,0.358	0.18	5.59335e-05	chr5	179838255	179838256
KD SERBP1	1145	ENSG00000161010.14	MRNIP	RI	chr5	-	179837275-179837885:179837885-179840871:179840871-179840959	0.541,0.568,0.53	0.345,0.397,0.358	0.18	5.59335e-05	chr5	179838294	179838295
KD SERBP1	1145	ENSG00000161010.14	MRNIP	RI	chr5	-	179837275-179837885:179837885-179840871:179840871-179840959	0.541,0.568,0.53	0.345,0.397,0.358	0.18	5.59335e-05	chr5	179838320	179838321
KD SERBP1	1145	ENSG00000161010.14	MRNIP	RI	chr5	-	179837275-179837885:179837885-179840871:179840871-179840959	0.541,0.568,0.53	0.345,0.397,0.358	0.18	5.59335e-05	chr5	179838422	179838423
KD SERBP1	1145	ENSG00000161010.14	MRNIP	RI	chr5	-	179837275-179837885:179837885-179840871:179840871-179840959	0.541,0.568,0.53	0.345,0.397,0.358	0.18	5.59335e-05	chr5	179838686	179838687
KD SERBP1	1145	ENSG00000161010.14	MRNIP	RI	chr5	-	179837275-179837885:179837885-179840871:179840871-179840959	0.541,0.568,0.53	0.345,0.397,0.358	0.18	5.59335e-05	chr5	179838758	179838759
KD SERBP1	1145	ENSG00000161010.14	MRNIP	RI	chr5	-	179837275-179837885:179837885-179840871:179840871-179840959	0.541,0.568,0.53	0.345,0.397,0.358	0.18	5.59335e-05	chr5	179839439	179839440
KD SERBP1	1145	ENSG00000161010.14	MRNIP	RI	chr5	-	179837275-179837885:179837885-179840871:179840871-179840959	0.541,0.568,0.53	0.345,0.397,0.358	0.18	5.59335e-05	chr5	179839567	179839568
KD SERBP1	1145	ENSG00000161010.14	MRNIP	RI	chr5	-	179837275-179837885:179837885-179840871:179840871-179840959	0.541,0.568,0.53	0.345,0.397,0.358	0.18	5.59335e-05	chr5	179839578	179839579
KD SERBP1	1145	ENSG00000161010.14	MRNIP	RI	chr5	-	179837275-179837885:179837885-179840871:179840871-179840959	0.541,0.568,0.53	0.345,0.397,0.358	0.18	5.59335e-05	chr5	179839595	179839596
KD SERBP1	1145	ENSG00000161010.14	MRNIP	RI	chr5	-	179837275-179837885:179837885-179840871:179840871-179840959	0.541,0.568,0.53	0.345,0.397,0.358	0.18	5.59335e-05	chr5	179839632	179839633
KD SERBP1	1145	ENSG00000161010.14	MRNIP	RI	chr5	-	179837275-179837885:179837885-179840871:179840871-179840959	0.541,0.568,0.53	0.345,0.397,0.358	0.18	5.59335e-05	chr5	179839644	179839645
KD SERBP1	1145	ENSG00000161010.14	MRNIP	RI	chr5	-	179837275-179837885:179837885-179840871:179840871-179840959	0.541,0.568,0.53	0.345,0.397,0.358	0.18	5.59335e-05	chr5	179839791	179839792
KD SERBP1	1145	ENSG00000161010.14	MRNIP	RI	chr5	-	179837275-179837885:179837885-179840871:179840871-179840959	0.541,0.568,0.53	0.345,0.397,0.358	0.18	5.59335e-05	chr5	179839838	179839839
KD SERBP1	1145	ENSG00000161010.14	MRNIP	RI	chr5	-	179837275-179837885:179837885-179840871:179840871-179840959	0.541,0.568,0.53	0.345,0.397,0.358	0.18	5.59335e-05	chr5	179839888	179839889
KD SERBP1	1145	ENSG00000161010.14	MRNIP	RI	chr5	-	179837275-179837885:179837885-179840871:179840871-179840959	0.541,0.568,0.53	0.345,0.397,0.358	0.18	5.59335e-05	chr5	179840438	179840439
KD SERBP1	1145	ENSG00000161010.14	MRNIP	RI	chr5	-	179837275-179837885:179837885-179840871:179840871-179840959	0.541,0.568,0.53	0.345,0.397,0.358	0.18	5.59335e-05	chr5	179840887	179840888
KD SERBP1	1145	ENSG00000161010.14	MRNIP	RI	chr5	-	179837275-179837885:179837885-179840871:179840871-179840959	0.541,0.568,0.53	0.345,0.397,0.358	0.18	5.59335e-05	chr5	179840932	179840933
KD SERBP1	1145	ENSG00000161010.14	MRNIP	RI	chr5	-	179837275-179837885:179837885-179840871:179840871-179840959	0.541,0.568,0.53	0.345,0.397,0.358	0.18	5.59335e-05	chr5	179840939	179840940
KD SERBP1	1145	ENSG00000161010.14	MRNIP	RI	chr5	-	179837275-179837885:179837885-179840871:179840871-179840959	0.541,0.568,0.53	0.345,0.397,0.358	0.18	5.59335e-05	chr5	179840957	179840958
KD SERBP1	5192	ENSG00000126746.17	ZNF384	A5SS	chr12	-	6689097-6689510:6689367-6689510:6688166-6688226	0.629,0.704,0.654	0.504,0.467,0.476	0.18	0.00200435	chr12	6689218	6689219
KD SERBP1	5192	ENSG00000126746.17	ZNF384	A5SS	chr12	-	6689097-6689510:6689367-6689510:6688166-6688226	0.629,0.704,0.654	0.504,0.467,0.476	0.18	0.00200435	chr12	6689442	6689443
KD SERBP1	18713	ENSG00000205581.10	HMGN1	SE	chr21	-	39345145-39345274:39345829-39347292:39347378-39347483	0.116,0.163,0.14	0.328,0.222,0.4	0.177	0.000263129	chr21	39345833	39345834
KD SERBP1	18713	ENSG00000205581.10	HMGN1	SE	chr21	-	39345145-39345274:39345829-39347292:39347378-39347483	0.116,0.163,0.14	0.328,0.222,0.4	0.177	0.000263129	chr21	39345834	39345835
KD SERBP1	18713	ENSG00000205581.10	HMGN1	SE	chr21	-	39345145-39345274:39345829-39347292:39347378-39347483	0.116,0.163,0.14	0.328,0.222,0.4	0.177	0.000263129	chr21	39345835	39345836
KD SERBP1	18713	ENSG00000205581.10	HMGN1	SE	chr21	-	39345145-39345274:39345829-39347292:39347378-39347483	0.116,0.163,0.14	0.328,0.222,0.4	0.177	0.000263129	chr21	39345840	39345841
KD SERBP1	18713	ENSG00000205581.10	HMGN1	SE	chr21	-	39345145-39345274:39345829-39347292:39347378-39347483	0.116,0.163,0.14	0.328,0.222,0.4	0.177	0.000263129	chr21	39345861	39345862
KD SERBP1	18713	ENSG00000205581.10	HMGN1	SE	chr21	-	39345145-39345274:39345829-39347292:39347378-39347483	0.116,0.163,0.14	0.328,0.222,0.4	0.177	0.000263129	chr21	39345873	39345874
KD SERBP1	18713	ENSG00000205581.10	HMGN1	SE	chr21	-	39345145-39345274:39345829-39347292:39347378-39347483	0.116,0.163,0.14	0.328,0.222,0.4	0.177	0.000263129	chr21	39345972	39345973
KD SERBP1	18713	ENSG00000205581.10	HMGN1	SE	chr21	-	39345145-39345274:39345829-39347292:39347378-39347483	0.116,0.163,0.14	0.328,0.222,0.4	0.177	0.000263129	chr21	39345977	39345978
KD SERBP1	18713	ENSG00000205581.10	HMGN1	SE	chr21	-	39345145-39345274:39345829-39347292:39347378-39347483	0.116,0.163,0.14	0.328,0.222,0.4	0.177	0.000263129	chr21	39345996	39345997
KD SERBP1	18713	ENSG00000205581.10	HMGN1	SE	chr21	-	39345145-39345274:39345829-39347292:39347378-39347483	0.116,0.163,0.14	0.328,0.222,0.4	0.177	0.000263129	chr21	39346223	39346224
KD SERBP1	18713	ENSG00000205581.10	HMGN1	SE	chr21	-	39345145-39345274:39345829-39347292:39347378-39347483	0.116,0.163,0.14	0.328,0.222,0.4	0.177	0.000263129	chr21	39346237	39346238
KD SERBP1	18713	ENSG00000205581.10	HMGN1	SE	chr21	-	39345145-39345274:39345829-39347292:39347378-39347483	0.116,0.163,0.14	0.328,0.222,0.4	0.177	0.000263129	chr21	39346276	39346277
KD SERBP1	18713	ENSG00000205581.10	HMGN1	SE	chr21	-	39345145-39345274:39345829-39347292:39347378-39347483	0.116,0.163,0.14	0.328,0.222,0.4	0.177	0.000263129	chr21	39346295	39346296
KD SERBP1	18713	ENSG00000205581.10	HMGN1	SE	chr21	-	39345145-39345274:39345829-39347292:39347378-39347483	0.116,0.163,0.14	0.328,0.222,0.4	0.177	0.000263129	chr21	39346304	39346305
KD SERBP1	18713	ENSG00000205581.10	HMGN1	SE	chr21	-	39345145-39345274:39345829-39347292:39347378-39347483	0.116,0.163,0.14	0.328,0.222,0.4	0.177	0.000263129	chr21	39346327	39346328
KD SERBP1	18713	ENSG00000205581.10	HMGN1	SE	chr21	-	39345145-39345274:39345829-39347292:39347378-39347483	0.116,0.163,0.14	0.328,0.222,0.4	0.177	0.000263129	chr21	39346401	39346402
KD SERBP1	18713	ENSG00000205581.10	HMGN1	SE	chr21	-	39345145-39345274:39345829-39347292:39347378-39347483	0.116,0.163,0.14	0.328,0.222,0.4	0.177	0.000263129	chr21	39346605	39346606
KD SERBP1	18713	ENSG00000205581.10	HMGN1	SE	chr21	-	39345145-39345274:39345829-39347292:39347378-39347483	0.116,0.163,0.14	0.328,0.222,0.4	0.177	0.000263129	chr21	39346617	39346618
KD SERBP1	18713	ENSG00000205581.10	HMGN1	SE	chr21	-	39345145-39345274:39345829-39347292:39347378-39347483	0.116,0.163,0.14	0.328,0.222,0.4	0.177	0.000263129	chr21	39346851	39346852
KD SERBP1	18713	ENSG00000205581.10	HMGN1	SE	chr21	-	39345145-39345274:39345829-39347292:39347378-39347483	0.116,0.163,0.14	0.328,0.222,0.4	0.177	0.000263129	chr21	39346859	39346860
KD SERBP1	18713	ENSG00000205581.10	HMGN1	SE	chr21	-	39345145-39345274:39345829-39347292:39347378-39347483	0.116,0.163,0.14	0.328,0.222,0.4	0.177	0.000263129	chr21	39346886	39346887
KD SERBP1	18713	ENSG00000205581.10	HMGN1	SE	chr21	-	39345145-39345274:39345829-39347292:39347378-39347483	0.116,0.163,0.14	0.328,0.222,0.4	0.177	0.000263129	chr21	39346904	39346905
KD SERBP1	18713	ENSG00000205581.10	HMGN1	SE	chr21	-	39345145-39345274:39345829-39347292:39347378-39347483	0.116,0.163,0.14	0.328,0.222,0.4	0.177	0.000263129	chr21	39346928	39346929
KD SERBP1	18713	ENSG00000205581.10	HMGN1	SE	chr21	-	39345145-39345274:39345829-39347292:39347378-39347483	0.116,0.163,0.14	0.328,0.222,0.4	0.177	0.000263129	chr21	39346989	39346990
KD SERBP1	18713	ENSG00000205581.10	HMGN1	SE	chr21	-	39345145-39345274:39345829-39347292:39347378-39347483	0.116,0.163,0.14	0.328,0.222,0.4	0.177	0.000263129	chr21	39347034	39347035
KD SERBP1	18713	ENSG00000205581.10	HMGN1	SE	chr21	-	39345145-39345274:39345829-39347292:39347378-39347483	0.116,0.163,0.14	0.328,0.222,0.4	0.177	0.000263129	chr21	39347189	39347190
KD SERBP1	18713	ENSG00000205581.10	HMGN1	SE	chr21	-	39345145-39345274:39345829-39347292:39347378-39347483	0.116,0.163,0.14	0.328,0.222,0.4	0.177	0.000263129	chr21	39347302	39347303
KD SERBP1	18713	ENSG00000205581.10	HMGN1	SE	chr21	-	39345145-39345274:39345829-39347292:39347378-39347483	0.116,0.163,0.14	0.328,0.222,0.4	0.177	0.000263129	chr21	39347352	39347353
KD SERBP1	18713	ENSG00000205581.10	HMGN1	SE	chr21	-	39345145-39345274:39345829-39347292:39347378-39347483	0.116,0.163,0.14	0.328,0.222,0.4	0.177	0.000263129	chr21	39347365	39347366
KD SERBP1	3227	ENSG00000116127.17	ALMS1	A5SS	chr2	+	73489633-73491498:73489633-73490158:73519774-73520016	1.0,0.82,1.0	0.891,0.895,0.508	0.175	0.0234506	chr2	73490489	73490490
KD SERBP1	3227	ENSG00000116127.17	ALMS1	A5SS	chr2	+	73489633-73491498:73489633-73490158:73519774-73520016	1.0,0.82,1.0	0.891,0.895,0.508	0.175	0.0234506	chr2	73490728	73490729
KD SERBP1	3227	ENSG00000116127.17	ALMS1	A5SS	chr2	+	73489633-73491498:73489633-73490158:73519774-73520016	1.0,0.82,1.0	0.891,0.895,0.508	0.175	0.0234506	chr2	73490824	73490825
KD SERBP1	3227	ENSG00000116127.17	ALMS1	A5SS	chr2	+	73489633-73491498:73489633-73490158:73519774-73520016	1.0,0.82,1.0	0.891,0.895,0.508	0.175	0.0234506	chr2	73490837	73490838
KD SERBP1	3227	ENSG00000116127.17	ALMS1	A5SS	chr2	+	73489633-73491498:73489633-73490158:73519774-73520016	1.0,0.82,1.0	0.891,0.895,0.508	0.175	0.0234506	chr2	73490916	73490917
KD SERBP1	3227	ENSG00000116127.17	ALMS1	A5SS	chr2	+	73489633-73491498:73489633-73490158:73519774-73520016	1.0,0.82,1.0	0.891,0.895,0.508	0.175	0.0234506	chr2	73490922	73490923
KD SERBP1	3227	ENSG00000116127.17	ALMS1	A5SS	chr2	+	73489633-73491498:73489633-73490158:73519774-73520016	1.0,0.82,1.0	0.891,0.895,0.508	0.175	0.0234506	chr2	73491035	73491036
KD SERBP1	3227	ENSG00000116127.17	ALMS1	A5SS	chr2	+	73489633-73491498:73489633-73490158:73519774-73520016	1.0,0.82,1.0	0.891,0.895,0.508	0.175	0.0234506	chr2	73491074	73491075
KD SERBP1	3227	ENSG00000116127.17	ALMS1	A5SS	chr2	+	73489633-73491498:73489633-73490158:73519774-73520016	1.0,0.82,1.0	0.891,0.895,0.508	0.175	0.0234506	chr2	73491308	73491309
KD SERBP1	3227	ENSG00000116127.17	ALMS1	A5SS	chr2	+	73489633-73491498:73489633-73490158:73519774-73520016	1.0,0.82,1.0	0.891,0.895,0.508	0.175	0.0234506	chr2	73491347	73491348
KD SERBP1	3227	ENSG00000116127.17	ALMS1	A5SS	chr2	+	73489633-73491498:73489633-73490158:73519774-73520016	1.0,0.82,1.0	0.891,0.895,0.508	0.175	0.0234506	chr2	73491413	73491414
KD SERBP1	7972	ENSG00000198270.12	TMEM116	MXE	chr12	-	111932584-111932659:111933885-111936830:111937159-111937243:111938160-111938210	0.847,0.899,0.902	0.618,0.747,0.764	0.173	0.0175088	chr12	111933810	111933811
KD SERBP1	7972	ENSG00000198270.12	TMEM116	MXE	chr12	-	111932584-111932659:111933885-111936830:111937159-111937243:111938160-111938210	0.847,0.899,0.902	0.618,0.747,0.764	0.173	0.0175088	chr12	111933863	111933864
KD SERBP1	7972	ENSG00000198270.12	TMEM116	MXE	chr12	-	111932584-111932659:111933885-111936830:111937159-111937243:111938160-111938210	0.847,0.899,0.902	0.618,0.747,0.764	0.173	0.0175088	chr12	111936321	111936322
KD SERBP1	1166	ENSG00000119599.16	DCAF4	A3SS	chr14	+	72939801-72939902:72940219-72940377:72940251-72940377	0.866,0.941,0.974	0.719,0.85,0.7	0.171	0.0115392	chr14	72940163	72940164
KD SERBP1	1166	ENSG00000119599.16	DCAF4	A3SS	chr14	+	72939801-72939902:72940219-72940377:72940251-72940377	0.866,0.941,0.974	0.719,0.85,0.7	0.171	0.0115392	chr14	72940281	72940282
KD SERBP1	1166	ENSG00000119599.16	DCAF4	A3SS	chr14	+	72939801-72939902:72940219-72940377:72940251-72940377	0.866,0.941,0.974	0.719,0.85,0.7	0.171	0.0115392	chr14	72940298	72940299
KD SERBP1	1166	ENSG00000119599.16	DCAF4	A3SS	chr14	+	72939801-72939902:72940219-72940377:72940251-72940377	0.866,0.941,0.974	0.719,0.85,0.7	0.171	0.0115392	chr14	72940302	72940303
KD SERBP1	16132	ENSG00000151422.12	FER	SE	chr5	+	108798113-108798389:108832769-108832943:108835707-108835807	0.606,0.887,1.0	1.0,1.0,1.0	0.169	0.0103249	chr5	108832802	108832803
KD SERBP1	16132	ENSG00000151422.12	FER	SE	chr5	+	108798113-108798389:108832769-108832943:108835707-108835807	0.606,0.887,1.0	1.0,1.0,1.0	0.169	0.0103249	chr5	108832861	108832862
KD SERBP1	16132	ENSG00000151422.12	FER	SE	chr5	+	108798113-108798389:108832769-108832943:108835707-108835807	0.606,0.887,1.0	1.0,1.0,1.0	0.169	0.0103249	chr5	108832876	108832877
KD SERBP1	16132	ENSG00000151422.12	FER	SE	chr5	+	108798113-108798389:108832769-108832943:108835707-108835807	0.606,0.887,1.0	1.0,1.0,1.0	0.169	0.0103249	chr5	108832878	108832879
KD SERBP1	16132	ENSG00000151422.12	FER	SE	chr5	+	108798113-108798389:108832769-108832943:108835707-108835807	0.606,0.887,1.0	1.0,1.0,1.0	0.169	0.0103249	chr5	108832910	108832911
KD SERBP1	16132	ENSG00000151422.12	FER	SE	chr5	+	108798113-108798389:108832769-108832943:108835707-108835807	0.606,0.887,1.0	1.0,1.0,1.0	0.169	0.0103249	chr5	108832916	108832917
KD SERBP1	4246	ENSG00000143207.20	COP1	MXE	chr1	-	176116623-176116681:176135009-176135086:176184632-176184692:176206571-176206691	0.459,0.494,0.491	0.299,0.321,0.319	0.168	0.0164521	chr1	176135014	176135015
KD SERBP1	4246	ENSG00000143207.20	COP1	MXE	chr1	-	176116623-176116681:176135009-176135086:176184632-176184692:176206571-176206691	0.459,0.494,0.491	0.299,0.321,0.319	0.168	0.0164521	chr1	176184648	176184649
KD SERBP1	4246	ENSG00000143207.20	COP1	MXE	chr1	-	176116623-176116681:176135009-176135086:176184632-176184692:176206571-176206691	0.459,0.494,0.491	0.299,0.321,0.319	0.168	0.0164521	chr1	176184650	176184651
KD SERBP1	4246	ENSG00000143207.20	COP1	MXE	chr1	-	176116623-176116681:176135009-176135086:176184632-176184692:176206571-176206691	0.459,0.494,0.491	0.299,0.321,0.319	0.168	0.0164521	chr1	176184675	176184676
KD SERBP1	49270	ENSG00000176261.15	ZBTB8OS	SE	chr1	-	32627507-32627544:32633950-32634110:32650401-32650525	0.717,0.689,1.0	1.0,0.91,1.0	0.168	0.0115947	chr1	32633993	32633994
KD SERBP1	49270	ENSG00000176261.15	ZBTB8OS	SE	chr1	-	32627507-32627544:32633950-32634110:32650401-32650525	0.717,0.689,1.0	1.0,0.91,1.0	0.168	0.0115947	chr1	32634124	32634125
KD SERBP1	85806	ENSG00000100722.19	ZC3H14	SE	chr14	+	88575839-88575940:88577992-88578140:88601923-88602009	1.0,0.501,1.0	1.0,1.0,1.0	0.166	0.0466838	chr14	88577982	88577983
KD SERBP1	85806	ENSG00000100722.19	ZC3H14	SE	chr14	+	88575839-88575940:88577992-88578140:88601923-88602009	1.0,0.501,1.0	1.0,1.0,1.0	0.166	0.0466838	chr14	88578006	88578007
KD SERBP1	85806	ENSG00000100722.19	ZC3H14	SE	chr14	+	88575839-88575940:88577992-88578140:88601923-88602009	1.0,0.501,1.0	1.0,1.0,1.0	0.166	0.0466838	chr14	88578024	88578025
KD SERBP1	85806	ENSG00000100722.19	ZC3H14	SE	chr14	+	88575839-88575940:88577992-88578140:88601923-88602009	1.0,0.501,1.0	1.0,1.0,1.0	0.166	0.0466838	chr14	88578051	88578052
KD SERBP1	85806	ENSG00000100722.19	ZC3H14	SE	chr14	+	88575839-88575940:88577992-88578140:88601923-88602009	1.0,0.501,1.0	1.0,1.0,1.0	0.166	0.0466838	chr14	88578064	88578065
KD SERBP1	85806	ENSG00000100722.19	ZC3H14	SE	chr14	+	88575839-88575940:88577992-88578140:88601923-88602009	1.0,0.501,1.0	1.0,1.0,1.0	0.166	0.0466838	chr14	88578075	88578076
KD SERBP1	85806	ENSG00000100722.19	ZC3H14	SE	chr14	+	88575839-88575940:88577992-88578140:88601923-88602009	1.0,0.501,1.0	1.0,1.0,1.0	0.166	0.0466838	chr14	88578095	88578096
KD SERBP1	85806	ENSG00000100722.19	ZC3H14	SE	chr14	+	88575839-88575940:88577992-88578140:88601923-88602009	1.0,0.501,1.0	1.0,1.0,1.0	0.166	0.0466838	chr14	88578118	88578119
KD SERBP1	72807	ENSG00000026508.18	CD44	SE	chr11	+	35189834-35190065:35204511-35204640:35208104-35208206	0.372,0.421,0.41	0.544,0.571,0.581	0.164	1.245e-05	chr11	35204532	35204533
KD SERBP1	72807	ENSG00000026508.18	CD44	SE	chr11	+	35189834-35190065:35204511-35204640:35208104-35208206	0.372,0.421,0.41	0.544,0.571,0.581	0.164	1.245e-05	chr11	35204544	35204545
KD SERBP1	72807	ENSG00000026508.18	CD44	SE	chr11	+	35189834-35190065:35204511-35204640:35208104-35208206	0.372,0.421,0.41	0.544,0.571,0.581	0.164	1.245e-05	chr11	35204727	35204728
KD SERBP1	93122	ENSG00000185324.21	CDK10	SE	chr16	+	89686683-89686797:89687588-89687815:89690552-89690624	0.124,0.171,0.193	0.398,0.338,0.244	0.164	0.0138016	chr16	89687565	89687566
KD SERBP1	93122	ENSG00000185324.21	CDK10	SE	chr16	+	89686683-89686797:89687588-89687815:89690552-89690624	0.124,0.171,0.193	0.398,0.338,0.244	0.164	0.0138016	chr16	89687782	89687783
KD SERBP1	93122	ENSG00000185324.21	CDK10	SE	chr16	+	89686683-89686797:89687588-89687815:89690552-89690624	0.124,0.171,0.193	0.398,0.338,0.244	0.164	0.0138016	chr16	89687813	89687814
KD SERBP1	93122	ENSG00000185324.21	CDK10	SE	chr16	+	89686683-89686797:89687588-89687815:89690552-89690624	0.124,0.171,0.193	0.398,0.338,0.244	0.164	0.0138016	chr16	89687909	89687910
KD SERBP1	42750	ENSG00000122483.17	CCDC18	SE	chr1	+	93216635-93216746:93217737-93217869:93221608-93221743	1.0,0.788,0.488	1.0,1.0,0.761	0.162	0.0435102	chr1	93217716	93217717
KD SERBP1	42750	ENSG00000122483.17	CCDC18	SE	chr1	+	93216635-93216746:93217737-93217869:93221608-93221743	1.0,0.788,0.488	1.0,1.0,0.761	0.162	0.0435102	chr1	93217723	93217724
KD SERBP1	42750	ENSG00000122483.17	CCDC18	SE	chr1	+	93216635-93216746:93217737-93217869:93221608-93221743	1.0,0.788,0.488	1.0,1.0,0.761	0.162	0.0435102	chr1	93217815	93217816
KD SERBP1	42750	ENSG00000122483.17	CCDC18	SE	chr1	+	93216635-93216746:93217737-93217869:93221608-93221743	1.0,0.788,0.488	1.0,1.0,0.761	0.162	0.0435102	chr1	93217828	93217829
KD SERBP1	42750	ENSG00000122483.17	CCDC18	SE	chr1	+	93216635-93216746:93217737-93217869:93221608-93221743	1.0,0.788,0.488	1.0,1.0,0.761	0.162	0.0435102	chr1	93217832	93217833
KD SERBP1	42750	ENSG00000122483.17	CCDC18	SE	chr1	+	93216635-93216746:93217737-93217869:93221608-93221743	1.0,0.788,0.488	1.0,1.0,0.761	0.162	0.0435102	chr1	93217852	93217853
KD SERBP1	42750	ENSG00000122483.17	CCDC18	SE	chr1	+	93216635-93216746:93217737-93217869:93221608-93221743	1.0,0.788,0.488	1.0,1.0,0.761	0.162	0.0435102	chr1	93217934	93217935
KD SERBP1	47071	ENSG00000138778.11	CENPE	SE	chr4	-	103138350-103138452:103139788-103140079:103140255-103140414	0.05,0.053,0.0	0.078,0.213,0.297	0.162	0.0330619	chr4	103139796	103139797
KD SERBP1	47071	ENSG00000138778.11	CENPE	SE	chr4	-	103138350-103138452:103139788-103140079:103140255-103140414	0.05,0.053,0.0	0.078,0.213,0.297	0.162	0.0330619	chr4	103139912	103139913
KD SERBP1	47071	ENSG00000138778.11	CENPE	SE	chr4	-	103138350-103138452:103139788-103140079:103140255-103140414	0.05,0.053,0.0	0.078,0.213,0.297	0.162	0.0330619	chr4	103139958	103139959
KD SERBP1	47071	ENSG00000138778.11	CENPE	SE	chr4	-	103138350-103138452:103139788-103140079:103140255-103140414	0.05,0.053,0.0	0.078,0.213,0.297	0.162	0.0330619	chr4	103140057	103140058
KD SERBP1	36945	ENSG00000227036.7	LINC00511	SE	chr17	-	72403321-72404816:72420699-72421066:72422746-72423079	0.625,0.579,0.692	0.802,0.833,0.745	0.161	0.00800196	chr17	72420629	72420630
KD SERBP1	36945	ENSG00000227036.7	LINC00511	SE	chr17	-	72403321-72404816:72420699-72421066:72422746-72423079	0.625,0.579,0.692	0.802,0.833,0.745	0.161	0.00800196	chr17	72421004	72421005
KD SERBP1	36945	ENSG00000227036.7	LINC00511	SE	chr17	-	72403321-72404816:72420699-72421066:72422746-72423079	0.625,0.579,0.692	0.802,0.833,0.745	0.161	0.00800196	chr17	72421092	72421093
KD SERBP1	37343	ENSG00000204356.13	NELFE	SE	chr6	-	31956940-31957010:31958307-31958454:31958891-31958968	1.0,0.696,0.779	1.0,0.957,1.0	0.161	0.00119778	chr6	31958405	31958406
KD SERBP1	37343	ENSG00000204356.13	NELFE	SE	chr6	-	31956940-31957010:31958307-31958454:31958891-31958968	1.0,0.696,0.779	1.0,0.957,1.0	0.161	0.00119778	chr6	31958416	31958417
KD SERBP1	37343	ENSG00000204356.13	NELFE	SE	chr6	-	31956940-31957010:31958307-31958454:31958891-31958968	1.0,0.696,0.779	1.0,0.957,1.0	0.161	0.00119778	chr6	31958419	31958420
KD SERBP1	37343	ENSG00000204356.13	NELFE	SE	chr6	-	31956940-31957010:31958307-31958454:31958891-31958968	1.0,0.696,0.779	1.0,0.957,1.0	0.161	0.00119778	chr6	31958484	31958485
KD SERBP1	37343	ENSG00000204356.13	NELFE	SE	chr6	-	31956940-31957010:31958307-31958454:31958891-31958968	1.0,0.696,0.779	1.0,0.957,1.0	0.161	0.00119778	chr6	31958547	31958548
KD SERBP1	68904	ENSG00000204130.13	RUFY2	SE	chr10	-	68341106-68341288:68345701-68345911:68346006-68346084	0.521,1.0,1.0	1.0,1.0,1.0	0.16	0.049553	chr10	68345661	68345662
KD SERBP1	68904	ENSG00000204130.13	RUFY2	SE	chr10	-	68341106-68341288:68345701-68345911:68346006-68346084	0.521,1.0,1.0	1.0,1.0,1.0	0.16	0.049553	chr10	68345768	68345769
KD SERBP1	68904	ENSG00000204130.13	RUFY2	SE	chr10	-	68341106-68341288:68345701-68345911:68346006-68346084	0.521,1.0,1.0	1.0,1.0,1.0	0.16	0.049553	chr10	68345814	68345815
KD SERBP1	68904	ENSG00000204130.13	RUFY2	SE	chr10	-	68341106-68341288:68345701-68345911:68346006-68346084	0.521,1.0,1.0	1.0,1.0,1.0	0.16	0.049553	chr10	68345824	68345825
KD SERBP1	3391	ENSG00000159214.12	CCDC24	A3SS	chr1	+	43992522-43992639:43993803-43993964:43993839-43993964	1.0,0.547,1.0	0.79,0.617,0.662	0.159	0.0357123	chr1	43993807	43993808
KD SERBP1	3391	ENSG00000159214.12	CCDC24	A3SS	chr1	+	43992522-43992639:43993803-43993964:43993839-43993964	1.0,0.547,1.0	0.79,0.617,0.662	0.159	0.0357123	chr1	43993927	43993928
KD SERBP1	3391	ENSG00000159214.12	CCDC24	A3SS	chr1	+	43992522-43992639:43993803-43993964:43993839-43993964	1.0,0.547,1.0	0.79,0.617,0.662	0.159	0.0357123	chr1	43993932	43993933
KD SERBP1	4999	ENSG00000174483.19	BBS1	A5SS	chr11	+	66531655-66532205:66531655-66531742:66532295-66533603	1.0,1.0,1.0	0.641,0.883,1.0	0.159	0.0172465	chr11	66531678	66531679
KD SERBP1	4999	ENSG00000174483.19	BBS1	A5SS	chr11	+	66531655-66532205:66531655-66531742:66532295-66533603	1.0,1.0,1.0	0.641,0.883,1.0	0.159	0.0172465	chr11	66531784	66531785
KD SERBP1	4999	ENSG00000174483.19	BBS1	A5SS	chr11	+	66531655-66532205:66531655-66531742:66532295-66533603	1.0,1.0,1.0	0.641,0.883,1.0	0.159	0.0172465	chr11	66531927	66531928
KD SERBP1	4999	ENSG00000174483.19	BBS1	A5SS	chr11	+	66531655-66532205:66531655-66531742:66532295-66533603	1.0,1.0,1.0	0.641,0.883,1.0	0.159	0.0172465	chr11	66531990	66531991
KD SERBP1	4999	ENSG00000174483.19	BBS1	A5SS	chr11	+	66531655-66532205:66531655-66531742:66532295-66533603	1.0,1.0,1.0	0.641,0.883,1.0	0.159	0.0172465	chr11	66532061	66532062
KD SERBP1	12082	ENSG00000058272.18	PPP1R12A	MXE	chr12	-	79798493-79798584:79805591-79805768:79806165-79806333:79807225-79807330	0.291,0.312,0.386	0.219,0.15,0.145	0.158	0.0105071	chr12	79805644	79805645
KD SERBP1	12082	ENSG00000058272.18	PPP1R12A	MXE	chr12	-	79798493-79798584:79805591-79805768:79806165-79806333:79807225-79807330	0.291,0.312,0.386	0.219,0.15,0.145	0.158	0.0105071	chr12	79805686	79805687
KD SERBP1	12082	ENSG00000058272.18	PPP1R12A	MXE	chr12	-	79798493-79798584:79805591-79805768:79806165-79806333:79807225-79807330	0.291,0.312,0.386	0.219,0.15,0.145	0.158	0.0105071	chr12	79805695	79805696
KD SERBP1	12082	ENSG00000058272.18	PPP1R12A	MXE	chr12	-	79798493-79798584:79805591-79805768:79806165-79806333:79807225-79807330	0.291,0.312,0.386	0.219,0.15,0.145	0.158	0.0105071	chr12	79805751	79805752
KD SERBP1	12082	ENSG00000058272.18	PPP1R12A	MXE	chr12	-	79798493-79798584:79805591-79805768:79806165-79806333:79807225-79807330	0.291,0.312,0.386	0.219,0.15,0.145	0.158	0.0105071	chr12	79806187	79806188
KD SERBP1	3876	ENSG00000088340.15	FER1L4	A5SS	chr20	-	35560122-35560638:35560539-35560638:35559340-35559627	0.208,1.0,1.0	0.313,0.42,1.0	0.158	0.0211834	chr20	35560144	35560145
KD SERBP1	3876	ENSG00000088340.15	FER1L4	A5SS	chr20	-	35560122-35560638:35560539-35560638:35559340-35559627	0.208,1.0,1.0	0.313,0.42,1.0	0.158	0.0211834	chr20	35560166	35560167
KD SERBP1	3876	ENSG00000088340.15	FER1L4	A5SS	chr20	-	35560122-35560638:35560539-35560638:35559340-35559627	0.208,1.0,1.0	0.313,0.42,1.0	0.158	0.0211834	chr20	35560175	35560176
KD SERBP1	3876	ENSG00000088340.15	FER1L4	A5SS	chr20	-	35560122-35560638:35560539-35560638:35559340-35559627	0.208,1.0,1.0	0.313,0.42,1.0	0.158	0.0211834	chr20	35560400	35560401
KD SERBP1	3876	ENSG00000088340.15	FER1L4	A5SS	chr20	-	35560122-35560638:35560539-35560638:35559340-35559627	0.208,1.0,1.0	0.313,0.42,1.0	0.158	0.0211834	chr20	35560409	35560410
KD SERBP1	3876	ENSG00000088340.15	FER1L4	A5SS	chr20	-	35560122-35560638:35560539-35560638:35559340-35559627	0.208,1.0,1.0	0.313,0.42,1.0	0.158	0.0211834	chr20	35560504	35560505
KD SERBP1	3876	ENSG00000088340.15	FER1L4	A5SS	chr20	-	35560122-35560638:35560539-35560638:35559340-35559627	0.208,1.0,1.0	0.313,0.42,1.0	0.158	0.0211834	chr20	35560552	35560553
KD SERBP1	3876	ENSG00000088340.15	FER1L4	A5SS	chr20	-	35560122-35560638:35560539-35560638:35559340-35559627	0.208,1.0,1.0	0.313,0.42,1.0	0.158	0.0211834	chr20	35560569	35560570
KD SERBP1	3876	ENSG00000088340.15	FER1L4	A5SS	chr20	-	35560122-35560638:35560539-35560638:35559340-35559627	0.208,1.0,1.0	0.313,0.42,1.0	0.158	0.0211834	chr20	35560617	35560618
KD SERBP1	10444	ENSG00000142765.17	SYTL1	A3SS	chr1	+	27347966-27348012:27349079-27349152:27349115-27349152	1.0,1.0,1.0	0.787,1.0,0.744	0.156	0.00345424	chr1	27349088	27349089
KD SERBP1	10444	ENSG00000142765.17	SYTL1	A3SS	chr1	+	27347966-27348012:27349079-27349152:27349115-27349152	1.0,1.0,1.0	0.787,1.0,0.744	0.156	0.00345424	chr1	27349145	27349146
KD SERBP1	8211	ENSG00000075711.20	DLG1	MXE	chr3	-	197069218-197069260:197075836-197075870:197076585-197076685:197081050-197081117	0.917,0.889,0.917	0.754,0.715,0.79	0.155	8.68364e-09	chr3	197075743	197075744
KD SERBP1	8211	ENSG00000075711.20	DLG1	MXE	chr3	-	197069218-197069260:197075836-197075870:197076585-197076685:197081050-197081117	0.917,0.889,0.917	0.754,0.715,0.79	0.155	8.68364e-09	chr3	197075856	197075857
KD SERBP1	8211	ENSG00000075711.20	DLG1	MXE	chr3	-	197069218-197069260:197075836-197075870:197076585-197076685:197081050-197081117	0.917,0.889,0.917	0.754,0.715,0.79	0.155	8.68364e-09	chr3	197076637	197076638
KD SERBP1	8211	ENSG00000075711.20	DLG1	MXE	chr3	-	197069218-197069260:197075836-197075870:197076585-197076685:197081050-197081117	0.917,0.889,0.917	0.754,0.715,0.79	0.155	8.68364e-09	chr3	197076640	197076641
KD SERBP1	8211	ENSG00000075711.20	DLG1	MXE	chr3	-	197069218-197069260:197075836-197075870:197076585-197076685:197081050-197081117	0.917,0.889,0.917	0.754,0.715,0.79	0.155	8.68364e-09	chr3	197076651	197076652
KD SERBP1	8211	ENSG00000075711.20	DLG1	MXE	chr3	-	197069218-197069260:197075836-197075870:197076585-197076685:197081050-197081117	0.917,0.889,0.917	0.754,0.715,0.79	0.155	8.68364e-09	chr3	197076677	197076678
KD SERBP1	8211	ENSG00000075711.20	DLG1	MXE	chr3	-	197069218-197069260:197075836-197075870:197076585-197076685:197081050-197081117	0.917,0.889,0.917	0.754,0.715,0.79	0.155	8.68364e-09	chr3	197076678	197076679
KD SERBP1	8211	ENSG00000075711.20	DLG1	MXE	chr3	-	197069218-197069260:197075836-197075870:197076585-197076685:197081050-197081117	0.917,0.889,0.917	0.754,0.715,0.79	0.155	8.68364e-09	chr3	197076704	197076705
KD SERBP1	9383	ENSG00000007541.16	PIGQ	A3SS	chr16	+	579068-579180:580182-580972:580857-580972	0.812,0.756,0.806	0.629,0.592,0.688	0.155	0.000613165	chr16	580184	580185
KD SERBP1	9383	ENSG00000007541.16	PIGQ	A3SS	chr16	+	579068-579180:580182-580972:580857-580972	0.812,0.756,0.806	0.629,0.592,0.688	0.155	0.000613165	chr16	580204	580205
KD SERBP1	9383	ENSG00000007541.16	PIGQ	A3SS	chr16	+	579068-579180:580182-580972:580857-580972	0.812,0.756,0.806	0.629,0.592,0.688	0.155	0.000613165	chr16	580240	580241
KD SERBP1	9383	ENSG00000007541.16	PIGQ	A3SS	chr16	+	579068-579180:580182-580972:580857-580972	0.812,0.756,0.806	0.629,0.592,0.688	0.155	0.000613165	chr16	580246	580247
KD SERBP1	9383	ENSG00000007541.16	PIGQ	A3SS	chr16	+	579068-579180:580182-580972:580857-580972	0.812,0.756,0.806	0.629,0.592,0.688	0.155	0.000613165	chr16	580282	580283
KD SERBP1	9383	ENSG00000007541.16	PIGQ	A3SS	chr16	+	579068-579180:580182-580972:580857-580972	0.812,0.756,0.806	0.629,0.592,0.688	0.155	0.000613165	chr16	580327	580328
KD SERBP1	9383	ENSG00000007541.16	PIGQ	A3SS	chr16	+	579068-579180:580182-580972:580857-580972	0.812,0.756,0.806	0.629,0.592,0.688	0.155	0.000613165	chr16	580451	580452
KD SERBP1	9383	ENSG00000007541.16	PIGQ	A3SS	chr16	+	579068-579180:580182-580972:580857-580972	0.812,0.756,0.806	0.629,0.592,0.688	0.155	0.000613165	chr16	580453	580454
KD SERBP1	9383	ENSG00000007541.16	PIGQ	A3SS	chr16	+	579068-579180:580182-580972:580857-580972	0.812,0.756,0.806	0.629,0.592,0.688	0.155	0.000613165	chr16	580595	580596
KD SERBP1	9383	ENSG00000007541.16	PIGQ	A3SS	chr16	+	579068-579180:580182-580972:580857-580972	0.812,0.756,0.806	0.629,0.592,0.688	0.155	0.000613165	chr16	580621	580622
KD SERBP1	9383	ENSG00000007541.16	PIGQ	A3SS	chr16	+	579068-579180:580182-580972:580857-580972	0.812,0.756,0.806	0.629,0.592,0.688	0.155	0.000613165	chr16	580693	580694
KD SERBP1	2384	ENSG00000130349.9	C6orf203	A5SS	chr6	+	107028212-107028797:107028212-107028271:107039748-107040230	0.274,0.325,0.383	0.13,0.147,0.243	0.154	0.0241862	chr6	107028229	107028230
KD SERBP1	2384	ENSG00000130349.9	C6orf203	A5SS	chr6	+	107028212-107028797:107028212-107028271:107039748-107040230	0.274,0.325,0.383	0.13,0.147,0.243	0.154	0.0241862	chr6	107028537	107028538
KD SERBP1	2384	ENSG00000130349.9	C6orf203	A5SS	chr6	+	107028212-107028797:107028212-107028271:107039748-107040230	0.274,0.325,0.383	0.13,0.147,0.243	0.154	0.0241862	chr6	107028559	107028560
KD SERBP1	2384	ENSG00000130349.9	C6orf203	A5SS	chr6	+	107028212-107028797:107028212-107028271:107039748-107040230	0.274,0.325,0.383	0.13,0.147,0.243	0.154	0.0241862	chr6	107028746	107028747
KD SERBP1	2384	ENSG00000130349.9	C6orf203	A5SS	chr6	+	107028212-107028797:107028212-107028271:107039748-107040230	0.274,0.325,0.383	0.13,0.147,0.243	0.154	0.0241862	chr6	107028880	107028881
KD SERBP1	1770	ENSG00000100429.17	HDAC10	SE	chr22	-	50248830-50248890:50249102-50249198:50249327-50249454	0.838,0.77,0.938	1.0,1.0,1.0	0.151	0.027622	chr22	50249010	50249011
KD SERBP1	1770	ENSG00000100429.17	HDAC10	SE	chr22	-	50248830-50248890:50249102-50249198:50249327-50249454	0.838,0.77,0.938	1.0,1.0,1.0	0.151	0.027622	chr22	50249014	50249015
KD SERBP1	1770	ENSG00000100429.17	HDAC10	SE	chr22	-	50248830-50248890:50249102-50249198:50249327-50249454	0.838,0.77,0.938	1.0,1.0,1.0	0.151	0.027622	chr22	50249051	50249052
KD SERBP1	1770	ENSG00000100429.17	HDAC10	SE	chr22	-	50248830-50248890:50249102-50249198:50249327-50249454	0.838,0.77,0.938	1.0,1.0,1.0	0.151	0.027622	chr22	50249078	50249079
KD SERBP1	1770	ENSG00000100429.17	HDAC10	SE	chr22	-	50248830-50248890:50249102-50249198:50249327-50249454	0.838,0.77,0.938	1.0,1.0,1.0	0.151	0.027622	chr22	50249098	50249099
KD SERBP1	1770	ENSG00000100429.17	HDAC10	SE	chr22	-	50248830-50248890:50249102-50249198:50249327-50249454	0.838,0.77,0.938	1.0,1.0,1.0	0.151	0.027622	chr22	50249099	50249100
KD SERBP1	1770	ENSG00000100429.17	HDAC10	SE	chr22	-	50248830-50248890:50249102-50249198:50249327-50249454	0.838,0.77,0.938	1.0,1.0,1.0	0.151	0.027622	chr22	50249105	50249106
KD SERBP1	1770	ENSG00000100429.17	HDAC10	SE	chr22	-	50248830-50248890:50249102-50249198:50249327-50249454	0.838,0.77,0.938	1.0,1.0,1.0	0.151	0.027622	chr22	50249120	50249121
KD SERBP1	1770	ENSG00000100429.17	HDAC10	SE	chr22	-	50248830-50248890:50249102-50249198:50249327-50249454	0.838,0.77,0.938	1.0,1.0,1.0	0.151	0.027622	chr22	50249184	50249185
KD SERBP1	1770	ENSG00000100429.17	HDAC10	SE	chr22	-	50248830-50248890:50249102-50249198:50249327-50249454	0.838,0.77,0.938	1.0,1.0,1.0	0.151	0.027622	chr22	50249187	50249188
KD SERBP1	4412	ENSG00000142186.16	SCYL1	RI	chr11	+	65538269-65538324:65538324-65538446:65538446-65538704	0.832,0.861,0.887	0.799,0.615,0.712	0.151	0.0202357	chr11	65538324	65538325
KD SERBP1	4412	ENSG00000142186.16	SCYL1	RI	chr11	+	65538269-65538324:65538324-65538446:65538446-65538704	0.832,0.861,0.887	0.799,0.615,0.712	0.151	0.0202357	chr11	65538329	65538330
KD SERBP1	4412	ENSG00000142186.16	SCYL1	RI	chr11	+	65538269-65538324:65538324-65538446:65538446-65538704	0.832,0.861,0.887	0.799,0.615,0.712	0.151	0.0202357	chr11	65538467	65538468
KD SERBP1	4412	ENSG00000142186.16	SCYL1	RI	chr11	+	65538269-65538324:65538324-65538446:65538446-65538704	0.832,0.861,0.887	0.799,0.615,0.712	0.151	0.0202357	chr11	65538497	65538498
KD SERBP1	101505	ENSG00000104856.13	RELB	SE	chr19	+	45002948-45002996:45009813-45009822:45011935-45012229	0.91,0.635,0.785	1.0,0.85,0.93	0.15	0.0468978	chr19	45009800	45009801
KD SERBP1	3104	ENSG00000269893.6	SNHG8	A5SS	chr4	+	118278708-118279137:118278708-118278792:118279388-118279431	0.708,0.728,0.701	0.57,0.581,0.535	0.15	5.4589e-09	chr4	118278754	118278755
KD SERBP1	3104	ENSG00000269893.6	SNHG8	A5SS	chr4	+	118278708-118279137:118278708-118278792:118279388-118279431	0.708,0.728,0.701	0.57,0.581,0.535	0.15	5.4589e-09	chr4	118278755	118278756
KD SERBP1	3104	ENSG00000269893.6	SNHG8	A5SS	chr4	+	118278708-118279137:118278708-118278792:118279388-118279431	0.708,0.728,0.701	0.57,0.581,0.535	0.15	5.4589e-09	chr4	118278758	118278759
KD SERBP1	3104	ENSG00000269893.6	SNHG8	A5SS	chr4	+	118278708-118279137:118278708-118278792:118279388-118279431	0.708,0.728,0.701	0.57,0.581,0.535	0.15	5.4589e-09	chr4	118278775	118278776
KD SERBP1	3104	ENSG00000269893.6	SNHG8	A5SS	chr4	+	118278708-118279137:118278708-118278792:118279388-118279431	0.708,0.728,0.701	0.57,0.581,0.535	0.15	5.4589e-09	chr4	118278840	118278841
KD SERBP1	3104	ENSG00000269893.6	SNHG8	A5SS	chr4	+	118278708-118279137:118278708-118278792:118279388-118279431	0.708,0.728,0.701	0.57,0.581,0.535	0.15	5.4589e-09	chr4	118278846	118278847
KD SERBP1	3104	ENSG00000269893.6	SNHG8	A5SS	chr4	+	118278708-118279137:118278708-118278792:118279388-118279431	0.708,0.728,0.701	0.57,0.581,0.535	0.15	5.4589e-09	chr4	118278847	118278848
KD SERBP1	3104	ENSG00000269893.6	SNHG8	A5SS	chr4	+	118278708-118279137:118278708-118278792:118279388-118279431	0.708,0.728,0.701	0.57,0.581,0.535	0.15	5.4589e-09	chr4	118278858	118278859
KD SERBP1	3104	ENSG00000269893.6	SNHG8	A5SS	chr4	+	118278708-118279137:118278708-118278792:118279388-118279431	0.708,0.728,0.701	0.57,0.581,0.535	0.15	5.4589e-09	chr4	118278861	118278862
KD SERBP1	3104	ENSG00000269893.6	SNHG8	A5SS	chr4	+	118278708-118279137:118278708-118278792:118279388-118279431	0.708,0.728,0.701	0.57,0.581,0.535	0.15	5.4589e-09	chr4	118278872	118278873
KD SERBP1	3104	ENSG00000269893.6	SNHG8	A5SS	chr4	+	118278708-118279137:118278708-118278792:118279388-118279431	0.708,0.728,0.701	0.57,0.581,0.535	0.15	5.4589e-09	chr4	118278977	118278978
KD SERBP1	3104	ENSG00000269893.6	SNHG8	A5SS	chr4	+	118278708-118279137:118278708-118278792:118279388-118279431	0.708,0.728,0.701	0.57,0.581,0.535	0.15	5.4589e-09	chr4	118279034	118279035
KD SERBP1	3104	ENSG00000269893.6	SNHG8	A5SS	chr4	+	118278708-118279137:118278708-118278792:118279388-118279431	0.708,0.728,0.701	0.57,0.581,0.535	0.15	5.4589e-09	chr4	118279046	118279047
KD SERBP1	3104	ENSG00000269893.6	SNHG8	A5SS	chr4	+	118278708-118279137:118278708-118278792:118279388-118279431	0.708,0.728,0.701	0.57,0.581,0.535	0.15	5.4589e-09	chr4	118279103	118279104
KD SERBP1	3104	ENSG00000269893.6	SNHG8	A5SS	chr4	+	118278708-118279137:118278708-118278792:118279388-118279431	0.708,0.728,0.701	0.57,0.581,0.535	0.15	5.4589e-09	chr4	118279106	118279107
KD SERBP1	3104	ENSG00000269893.6	SNHG8	A5SS	chr4	+	118278708-118279137:118278708-118278792:118279388-118279431	0.708,0.728,0.701	0.57,0.581,0.535	0.15	5.4589e-09	chr4	118279173	118279174
KD SERBP1	3104	ENSG00000269893.6	SNHG8	A5SS	chr4	+	118278708-118279137:118278708-118278792:118279388-118279431	0.708,0.728,0.701	0.57,0.581,0.535	0.15	5.4589e-09	chr4	118279185	118279186
KD SERBP1	3104	ENSG00000269893.6	SNHG8	A5SS	chr4	+	118278708-118279137:118278708-118278792:118279388-118279431	0.708,0.728,0.701	0.57,0.581,0.535	0.15	5.4589e-09	chr4	118279186	118279187
KD SERBP1	3104	ENSG00000269893.6	SNHG8	A5SS	chr4	+	118278708-118279137:118278708-118278792:118279388-118279431	0.708,0.728,0.701	0.57,0.581,0.535	0.15	5.4589e-09	chr4	118279187	118279188
KD SERBP1	36476	ENSG00000198825.13	INPP5F	SE	chr10	+	119781634-119781771:119791516-119791645:119791868-119792036	0.968,0.767,0.734	1.0,0.918,1.0	0.15	0.0017189	chr10	119791614	119791615
KD SERBP1	36476	ENSG00000198825.13	INPP5F	SE	chr10	+	119781634-119781771:119791516-119791645:119791868-119792036	0.968,0.767,0.734	1.0,0.918,1.0	0.15	0.0017189	chr10	119791639	119791640
KD SERBP1	25495	ENSG00000149657.19	LSM14B	SE	chr20	+	62126303-62126439:62127584-62127701:62130218-62130296	0.73,0.576,0.642	0.793,0.829,0.772	0.149	0.0400793	chr20	62127538	62127539
KD SERBP1	25495	ENSG00000149657.19	LSM14B	SE	chr20	+	62126303-62126439:62127584-62127701:62130218-62130296	0.73,0.576,0.642	0.793,0.829,0.772	0.149	0.0400793	chr20	62127551	62127552
KD SERBP1	25495	ENSG00000149657.19	LSM14B	SE	chr20	+	62126303-62126439:62127584-62127701:62130218-62130296	0.73,0.576,0.642	0.793,0.829,0.772	0.149	0.0400793	chr20	62127632	62127633
KD SERBP1	25495	ENSG00000149657.19	LSM14B	SE	chr20	+	62126303-62126439:62127584-62127701:62130218-62130296	0.73,0.576,0.642	0.793,0.829,0.772	0.149	0.0400793	chr20	62127685	62127686
KD SERBP1	41408	ENSG00000100852.12	ARHGAP5	SE	chr14	+	32077288-32077435:32090501-32094386:32117142-32117287	0.692,0.853,0.939	0.948,0.974,1.0	0.146	0.000710824	chr14	32090472	32090473
KD SERBP1	41408	ENSG00000100852.12	ARHGAP5	SE	chr14	+	32077288-32077435:32090501-32094386:32117142-32117287	0.692,0.853,0.939	0.948,0.974,1.0	0.146	0.000710824	chr14	32090478	32090479
KD SERBP1	41408	ENSG00000100852.12	ARHGAP5	SE	chr14	+	32077288-32077435:32090501-32094386:32117142-32117287	0.692,0.853,0.939	0.948,0.974,1.0	0.146	0.000710824	chr14	32090479	32090480
KD SERBP1	41408	ENSG00000100852.12	ARHGAP5	SE	chr14	+	32077288-32077435:32090501-32094386:32117142-32117287	0.692,0.853,0.939	0.948,0.974,1.0	0.146	0.000710824	chr14	32090480	32090481
KD SERBP1	41408	ENSG00000100852.12	ARHGAP5	SE	chr14	+	32077288-32077435:32090501-32094386:32117142-32117287	0.692,0.853,0.939	0.948,0.974,1.0	0.146	0.000710824	chr14	32090481	32090482
KD SERBP1	41408	ENSG00000100852.12	ARHGAP5	SE	chr14	+	32077288-32077435:32090501-32094386:32117142-32117287	0.692,0.853,0.939	0.948,0.974,1.0	0.146	0.000710824	chr14	32090482	32090483
KD SERBP1	41408	ENSG00000100852.12	ARHGAP5	SE	chr14	+	32077288-32077435:32090501-32094386:32117142-32117287	0.692,0.853,0.939	0.948,0.974,1.0	0.146	0.000710824	chr14	32090508	32090509
KD SERBP1	41408	ENSG00000100852.12	ARHGAP5	SE	chr14	+	32077288-32077435:32090501-32094386:32117142-32117287	0.692,0.853,0.939	0.948,0.974,1.0	0.146	0.000710824	chr14	32090509	32090510
KD SERBP1	41408	ENSG00000100852.12	ARHGAP5	SE	chr14	+	32077288-32077435:32090501-32094386:32117142-32117287	0.692,0.853,0.939	0.948,0.974,1.0	0.146	0.000710824	chr14	32090563	32090564
KD SERBP1	41408	ENSG00000100852.12	ARHGAP5	SE	chr14	+	32077288-32077435:32090501-32094386:32117142-32117287	0.692,0.853,0.939	0.948,0.974,1.0	0.146	0.000710824	chr14	32090603	32090604
KD SERBP1	41408	ENSG00000100852.12	ARHGAP5	SE	chr14	+	32077288-32077435:32090501-32094386:32117142-32117287	0.692,0.853,0.939	0.948,0.974,1.0	0.146	0.000710824	chr14	32090605	32090606
KD SERBP1	41408	ENSG00000100852.12	ARHGAP5	SE	chr14	+	32077288-32077435:32090501-32094386:32117142-32117287	0.692,0.853,0.939	0.948,0.974,1.0	0.146	0.000710824	chr14	32090607	32090608
KD SERBP1	41408	ENSG00000100852.12	ARHGAP5	SE	chr14	+	32077288-32077435:32090501-32094386:32117142-32117287	0.692,0.853,0.939	0.948,0.974,1.0	0.146	0.000710824	chr14	32090609	32090610
KD SERBP1	41408	ENSG00000100852.12	ARHGAP5	SE	chr14	+	32077288-32077435:32090501-32094386:32117142-32117287	0.692,0.853,0.939	0.948,0.974,1.0	0.146	0.000710824	chr14	32090610	32090611
KD SERBP1	41408	ENSG00000100852.12	ARHGAP5	SE	chr14	+	32077288-32077435:32090501-32094386:32117142-32117287	0.692,0.853,0.939	0.948,0.974,1.0	0.146	0.000710824	chr14	32090634	32090635
KD SERBP1	41408	ENSG00000100852.12	ARHGAP5	SE	chr14	+	32077288-32077435:32090501-32094386:32117142-32117287	0.692,0.853,0.939	0.948,0.974,1.0	0.146	0.000710824	chr14	32090640	32090641
KD SERBP1	41408	ENSG00000100852.12	ARHGAP5	SE	chr14	+	32077288-32077435:32090501-32094386:32117142-32117287	0.692,0.853,0.939	0.948,0.974,1.0	0.146	0.000710824	chr14	32090654	32090655
KD SERBP1	41408	ENSG00000100852.12	ARHGAP5	SE	chr14	+	32077288-32077435:32090501-32094386:32117142-32117287	0.692,0.853,0.939	0.948,0.974,1.0	0.146	0.000710824	chr14	32090671	32090672
KD SERBP1	41408	ENSG00000100852.12	ARHGAP5	SE	chr14	+	32077288-32077435:32090501-32094386:32117142-32117287	0.692,0.853,0.939	0.948,0.974,1.0	0.146	0.000710824	chr14	32090689	32090690
KD SERBP1	41408	ENSG00000100852.12	ARHGAP5	SE	chr14	+	32077288-32077435:32090501-32094386:32117142-32117287	0.692,0.853,0.939	0.948,0.974,1.0	0.146	0.000710824	chr14	32090715	32090716
KD SERBP1	41408	ENSG00000100852.12	ARHGAP5	SE	chr14	+	32077288-32077435:32090501-32094386:32117142-32117287	0.692,0.853,0.939	0.948,0.974,1.0	0.146	0.000710824	chr14	32090746	32090747
KD SERBP1	41408	ENSG00000100852.12	ARHGAP5	SE	chr14	+	32077288-32077435:32090501-32094386:32117142-32117287	0.692,0.853,0.939	0.948,0.974,1.0	0.146	0.000710824	chr14	32090791	32090792
KD SERBP1	41408	ENSG00000100852.12	ARHGAP5	SE	chr14	+	32077288-32077435:32090501-32094386:32117142-32117287	0.692,0.853,0.939	0.948,0.974,1.0	0.146	0.000710824	chr14	32090825	32090826
KD SERBP1	41408	ENSG00000100852.12	ARHGAP5	SE	chr14	+	32077288-32077435:32090501-32094386:32117142-32117287	0.692,0.853,0.939	0.948,0.974,1.0	0.146	0.000710824	chr14	32090845	32090846
KD SERBP1	41408	ENSG00000100852.12	ARHGAP5	SE	chr14	+	32077288-32077435:32090501-32094386:32117142-32117287	0.692,0.853,0.939	0.948,0.974,1.0	0.146	0.000710824	chr14	32090903	32090904
KD SERBP1	41408	ENSG00000100852.12	ARHGAP5	SE	chr14	+	32077288-32077435:32090501-32094386:32117142-32117287	0.692,0.853,0.939	0.948,0.974,1.0	0.146	0.000710824	chr14	32090932	32090933
KD SERBP1	41408	ENSG00000100852.12	ARHGAP5	SE	chr14	+	32077288-32077435:32090501-32094386:32117142-32117287	0.692,0.853,0.939	0.948,0.974,1.0	0.146	0.000710824	chr14	32091002	32091003
KD SERBP1	41408	ENSG00000100852.12	ARHGAP5	SE	chr14	+	32077288-32077435:32090501-32094386:32117142-32117287	0.692,0.853,0.939	0.948,0.974,1.0	0.146	0.000710824	chr14	32091058	32091059
KD SERBP1	41408	ENSG00000100852.12	ARHGAP5	SE	chr14	+	32077288-32077435:32090501-32094386:32117142-32117287	0.692,0.853,0.939	0.948,0.974,1.0	0.146	0.000710824	chr14	32091065	32091066
KD SERBP1	41408	ENSG00000100852.12	ARHGAP5	SE	chr14	+	32077288-32077435:32090501-32094386:32117142-32117287	0.692,0.853,0.939	0.948,0.974,1.0	0.146	0.000710824	chr14	32091098	32091099
KD SERBP1	41408	ENSG00000100852.12	ARHGAP5	SE	chr14	+	32077288-32077435:32090501-32094386:32117142-32117287	0.692,0.853,0.939	0.948,0.974,1.0	0.146	0.000710824	chr14	32091100	32091101
KD SERBP1	41408	ENSG00000100852.12	ARHGAP5	SE	chr14	+	32077288-32077435:32090501-32094386:32117142-32117287	0.692,0.853,0.939	0.948,0.974,1.0	0.146	0.000710824	chr14	32091106	32091107
KD SERBP1	41408	ENSG00000100852.12	ARHGAP5	SE	chr14	+	32077288-32077435:32090501-32094386:32117142-32117287	0.692,0.853,0.939	0.948,0.974,1.0	0.146	0.000710824	chr14	32091143	32091144
KD SERBP1	41408	ENSG00000100852.12	ARHGAP5	SE	chr14	+	32077288-32077435:32090501-32094386:32117142-32117287	0.692,0.853,0.939	0.948,0.974,1.0	0.146	0.000710824	chr14	32091144	32091145
KD SERBP1	41408	ENSG00000100852.12	ARHGAP5	SE	chr14	+	32077288-32077435:32090501-32094386:32117142-32117287	0.692,0.853,0.939	0.948,0.974,1.0	0.146	0.000710824	chr14	32091145	32091146
KD SERBP1	41408	ENSG00000100852.12	ARHGAP5	SE	chr14	+	32077288-32077435:32090501-32094386:32117142-32117287	0.692,0.853,0.939	0.948,0.974,1.0	0.146	0.000710824	chr14	32091158	32091159
KD SERBP1	41408	ENSG00000100852.12	ARHGAP5	SE	chr14	+	32077288-32077435:32090501-32094386:32117142-32117287	0.692,0.853,0.939	0.948,0.974,1.0	0.146	0.000710824	chr14	32091217	32091218
KD SERBP1	41408	ENSG00000100852.12	ARHGAP5	SE	chr14	+	32077288-32077435:32090501-32094386:32117142-32117287	0.692,0.853,0.939	0.948,0.974,1.0	0.146	0.000710824	chr14	32091288	32091289
KD SERBP1	41408	ENSG00000100852.12	ARHGAP5	SE	chr14	+	32077288-32077435:32090501-32094386:32117142-32117287	0.692,0.853,0.939	0.948,0.974,1.0	0.146	0.000710824	chr14	32091302	32091303
KD SERBP1	41408	ENSG00000100852.12	ARHGAP5	SE	chr14	+	32077288-32077435:32090501-32094386:32117142-32117287	0.692,0.853,0.939	0.948,0.974,1.0	0.146	0.000710824	chr14	32091318	32091319
KD SERBP1	41408	ENSG00000100852.12	ARHGAP5	SE	chr14	+	32077288-32077435:32090501-32094386:32117142-32117287	0.692,0.853,0.939	0.948,0.974,1.0	0.146	0.000710824	chr14	32091328	32091329
KD SERBP1	41408	ENSG00000100852.12	ARHGAP5	SE	chr14	+	32077288-32077435:32090501-32094386:32117142-32117287	0.692,0.853,0.939	0.948,0.974,1.0	0.146	0.000710824	chr14	32091334	32091335
[truncated: 2,023 more rows]

## Sheet: rMATS hnRNPU
AS Events KD												AS Events Control
[truncated: 4,838 more rows]

## Sheet: Overlap SERBP1 hnRNPU
AS Events KD						SERBP1				HNRNPU					AS Events Control						SERBP1				HNRNPU
[truncated: 247 more rows]

## Sheet: Splicing events in snoRNA hosts
gene.id	event.id	gene.symbol	event.type	chr	strand	event.coords	inc.levels.KD	inc.levels.control	deltaPSI	FDR	snoRNA.id	snoRNA.symbol	snoRNA.coord	overlap
[truncated: 25 more rows]
